# Supplementary material
Source: publisher figshare collection journal article supplement (https://gsajournals.figshare.com/ndownloader/files/25118438)
Supplement: Supplementary file 1 [file 25118438]

serial	sampname	type	content_type	consensus_strain	chromosomal_sex_marker_selection	replicate	replicate_name	array_calibration_sample	chromosomal_sex	sample_x_intensity	sample_y_intensity	median_autosomal_intensity	mean_autosome_xyraw	sample_h_calls	sample_n_calls	H_calls_on_X	ks_stat	pd_stat	negative_construct_control	BlastR	Cas9	Cre	DTA	IRES	Luc	SV40	bpA	chlor	g_FP	hCMV_a	hCMV_b	hTK_pr	iCre	r_FP	rtTA	tTA
TH7775	(129S1/SvImJxA/J)F1_F0056	F1	Final	0	FALSE	TRUE	(129S1/SvImJxA/J)F1_F0056	TRUE	XX	0.881105991	0.053917051	1.085	9876.28	3204	30	182	0.090041731	1417.898541	TRUE	0.414427418	0.589695891	1.324689447	0.949750593	0.504339841	0.700466376	1.249256164	0.900339262	0.780557284	1.769593936	0.522666584	1.127044121	0.146816456	0.707959078	0.466572573	0.507984939	1.083201689
LZ0698	(129S1/SvImJxNOD/ShiLtJ)F1_F063	F1	Final	0	FALSE	TRUE	(129S1/SvImJxNOD/ShiLtJ)F1_F063	TRUE	XX	0.868421053	0.049909256	1.102	11157.94	2846	17	103	0.062821217	371.4031842	TRUE	0.40043248	0.539078194	1.285273545	1.095184626	0.51721035	0.72594071	1.155769307	0.840657266	0.729704847	1.659088199	0.701294574	0.911996625	0.128518392	0.778907495	0.268418818	0.412083381	1.010670788
XW7739	(129S1/SvImJxNZO/HlLtJ)F1_F0005	F1	Final	0	FALSE	TRUE	(129S1/SvImJxNZO/HlLtJ)F1_F0005	TRUE	XX	0.825329567	0.061205273	1.062	7383.4	2699	72	118	0.085151548	1310.894111	TRUE	0.499092343	0.530107851	2.790312199	0.942112982	0.550965441	0.775387697	1.374433948	0.863829298	0.844055219	1.880704553	0.634124926	1.248882088	0.208711343	0.854484014	0.4428852	0.614486285	1.241026632
FG6750	(129S6/SvEvTacx C57BL/6J)F1_F001	F1	Final	0	FALSE	TRUE	(129S6/SvEvTacx C57BL/6J)F1_F001	TRUE	XX	0.952067669	0.054511278	1.064	10028.08	2982	89	112	0.052235888	637.3783838	TRUE	0.505081799	0.537091919	1.241613719	1.139500439	0.518942879	0.924105239	1.315306799	0.769938119	0.744609239	1.640693158	0.609787799	1.083058919	0.17790048	0.707513399	0.3729528	0.538687439	1.025321039
QA6853	(129S6/SvEvTacxC57BL/6J)F1_F002	F1	Final	0	FALSE	TRUE	(129S6/SvEvTacxC57BL/6J)F1_F002	TRUE	XX	0.871428571	0.051152074	1.085	11225.91	3016	34	113	0.074862728	783.5399283	TRUE	0.309284569	0.540446279	1.188411705	0.987180759	0.451544782	0.803409427	1.245779004	0.805012861	0.666315835	1.624545705	0.534299783	1.057642768	0.109924297	0.732947418	0.381617251	0.484237016	1.036798128
GI8356	(129T2/SvEmsJxBALB/cAnNHsd)F1_F003	F1	Final	0	FALSE	TRUE	(129T2/SvEmsJxBALB/cAnNHsd)F1_F003	TRUE	XX	0.892857143	0.047920434	1.106	11844.61	3212	29	198	0.083709642	826.6079216	TRUE	0.334835738	0.50022737	0.967612808	0.844941016	0.405163063	0.563884997	1.206793254	0.755617715	0.671444435	1.509631326	0.52648403	0.818262223	0.146817788	0.606942542	0.31761272	0.488069945	0.835654094
QN0622	(129T2/SvEmsJxBALB/cAnNHsd)F1_F007	F1	Final	0	FALSE	TRUE	(129T2/SvEmsJxBALB/cAnNHsd)F1_F007	TRUE	XX	0.933541481	0.016503122	1.121	11180.52	3221	15	198	0.059654074	210.7532142	TRUE	0.194624181	0.328786071	0.832608688	0.865970278	0.386386243	0.415812417	0.537989178	0.750591053	0.477348004	1.162915261	0.46643617	0.635211828	0.15544891	0.635032945	0.161709798	0.206072663	0.607485037
AN1306	(129X1/SvJxC57BL/6JBomTac)F1_F001	F1	Final	0	FALSE	TRUE	(129X1/SvJxC57BL/6JBomTac)F1_F001	TRUE	XX	0.883122744	0.024819495	1.108	16792.61	2689	15	169	0.049141226	204.1832036	TRUE	0.227659608	0.388444578	1.059156103	1.077080649	0.452818116	0.577753992	0.724723365	1.033132757	0.607767187	1.365898095	0.706441518	0.831198745	0.150065972	0.600263888	0.232840457	0.226051758	0.740920962
LD1227	(129X1/SvJxDDK/Pas)F1_F001	F1	Final	0	FALSE	TRUE	(129X1/SvJxDDK/Pas)F1_F001	TRUE	XX	0.892921147	0.027777778	1.116	15937.89	2876	20	154	0.063334065	251.626371	TRUE	0.206991061	0.388194512	1.077683681	1.09380878	0.432303247	0.615890953	0.673615044	0.837062063	0.594934598	1.386695798	0.75493072	0.878535567	0.140733844	0.626494618	0.193877653	0.294016402	0.777581152
LY4163	(129X1/SvJxFVB/NJ)F1_F005	F1	Final	0	FALSE	TRUE	(129X1/SvJxFVB/NJ)F1_F005	TRUE	XX	0.922182469	0.018783542	1.118	9343.21	2937	17	131	0.057042609	200.037296	TRUE	0.303963987	0.352983532	0.846817981	0.869829339	0.404036638	0.604610058	0.734865048	0.814816139	0.615205985	1.491778188	0.572822274	0.795229727	0.126723014	0.603325703	0.163969306	0.275815209	0.725660505
LC2414	(129X1/SvJxFVB/NJ)F1_F006	F1	Final	0	FALSE	TRUE	(129X1/SvJxFVB/NJ)F1_F006	TRUE	XX	0.943497758	0.030493274	1.115	9798.33	2940	14	131	0.051770261	164.8269452	TRUE	0.242388291	0.355672924	0.94046657	0.996190363	0.409559669	0.595611818	0.785950413	0.948427112	0.636230993	1.552815937	0.545909461	1.002007682	0.162884932	0.657969395	0.263310228	0.335669512	0.73604394
HL2097	(129X1/SvJxFVB/NJ)F1_M001	F1	Final	0	FALSE	TRUE	(129X1/SvJxFVB/NJ)F1_M001	TRUE	XY	0.628647215	0.640141468	1.131	14293	2801	25	2	0.072882715	328.4894799	TRUE	0.233261084	0.373749464	1.10312763	1.016581751	0.437766828	0.569299773	0.716994479	0.882809947	0.593437468	1.319387381	0.627510098	0.774085374	0.132652374	0.635206174	0.201497277	0.30182613	0.787168704
PN7516	(A/JCrlxDBA/1J)F1_F001	F1	Final	0	FALSE	TRUE	(A/JCrlxDBA/1J)F1_F001	TRUE	XX	0.985054348	0.024456522	1.104	10943.24	2651	9	180	0.046895454	140.5128478	TRUE	0.258698456	0.383889868	0.893884953	0.756539923	0.409567814	0.544811091	0.821511524	0.63116575	0.610879259	1.461815333	0.522422845	0.915999056	0.146026186	0.684440635	0.25312424	0.375208711	0.659036831
FW4874	(A/JCrlxDBA/1J)F1_F003	F1	Final	0	FALSE	TRUE	(A/JCrlxDBA/1J)F1_F003	TRUE	XX	0.943938013	0.017319964	1.097	9901.36	2647	10	179	0.034358665	78.86686923	TRUE	0.243400914	0.339953309	1.087224413	0.899977403	0.391966368	0.594867793	0.733737609	0.676169758	0.523564455	1.532819779	0.598301665	0.947445631	0.133113031	0.684855434	0.220373773	0.304705625	0.703741729
MM4893	Cr_LTWV_3129	CROSS	Final	0	FALSE	FALSE		TRUE	XX*	0.565928778	0.034648701	1.039	9208.02	2514	176	92	0.187604876	10238.93216	FALSE	0.223392207	0.421914791	1.287464569	1.131404967	0.540398456	0.58872589	0.823629801	0.981970024	0.644763994	1.816568524	0.704277329	1.051148846	0.121524492	0.762921856	0.216333144	0.248479033	0.855232685
NB6105	Cr_LTWV_2707	CROSS	Final	0	FALSE	FALSE		TRUE	XX*	0.573239437	0.042253521	1.065	8746.25	2475	107	94	0.178470239	8385.450147	FALSE	0.226840063	0.38873801	1.260425832	1.09818488	0.55212231	0.522623955	0.7424896	1.536315484	0.680634523	1.729083804	0.874431854	0.90175785	0.145776754	0.769586926	0.210604534	0.285836772	0.840703115
CW4358	(A/JOlaHsdxC3H/HeJ)F1_F008	F1	Final	0	FALSE	TRUE	(A/JOlaHsdxC3H/HeJ)F1_F008	TRUE	XX	0.910946197	0.02690167	1.078	8269.44	1961	3	67	0.022937624	57.48032447	TRUE	0.272327879	0.408491819	1.041061595	0.846973564	0.455048761	0.578999061	0.764017558	0.781068282	0.684447512	1.576647819	0.690372941	0.850601377	0.153577445	0.676345394	0.256244572	0.343795808	0.74418551
WQ8019	(A/JOlaHsdxC57BL/6NJ)F1_F002	F1	Final	0	FALSE	TRUE	(A/JOlaHsdxC57BL/6NJ)F1_F002	TRUE	XX	0.971518987	0.02079566	1.106	9670.98	3087	10	187	0.069251043	325.6540932	TRUE	0.193568867	0.412781472	1.047981017	0.981183214	0.434702733	0.535313046	0.803228075	0.774999282	0.553822035	1.292837361	0.582361035	0.773241445	0.164926465	0.631890675	0.204322693	0.322511376	0.660946686
HK2132	(A/JOlaHsdxC57BL/6NJ)F1_F003	F1	Final	0	FALSE	TRUE	(A/JOlaHsdxC57BL/6NJ)F1_F003	TRUE	XX	0.929602888	0.022111913	1.108	9834.43	3093	4	189	0.05033714	174.2624212	TRUE	0.25868298	0.379076317	0.919117711	0.864615322	0.419749741	0.539736344	0.657384224	0.758152634	0.572478451	1.360932786	0.615490597	0.713716917	0.139814897	0.637149196	0.226754342	0.332708613	0.713106816
BB2647	(A/JxNZO/HlLtJ)F1_F001	F1	Final	0	FALSE	TRUE	(A/JxNZO/HlLtJ)F1_F001	TRUE	XX	0.89801444	0.02933213	1.108	7849.34	2840	6	181	0.053797496	208.8481177	TRUE	0.252505351	0.407168063	1.176914444	0.953838325	0.444623448	0.672031142	0.791149458	0.698275392	0.645532094	1.47719452	0.55393202	0.789238469	0.117207327	0.556607405	0.284992164	0.324868135	0.843383159
GL5565	(ALS/LtJxC57BL/6J)F1_F002	F1	Final	0	FALSE	TRUE	(ALS/LtJxC57BL/6J)F1_F002	TRUE	XX	0.84573991	0.02735426	1.115	16730.64	2807	8	130	0.052105205	197.2574204	TRUE	0.200350966	0.37243045	1.182082652	1.051424176	0.487548576	0.550188138	0.706189338	0.935708344	0.651140639	1.615957252	0.729858485	0.951248693	0.153849459	0.689393806	0.209734946	0.289947057	0.785983055
GN2579	(B6N/Tyr<c-Brd>BrdCrCrlxDBA/1OlaHsd)F1_F005	F1	Final	0	FALSE	FALSE		TRUE	XX	0.879046763	0.01618705	1.112	9446.48	2846	9	106	0.06470459	257.0674126	TRUE	0.186842162	0.333351824	0.942361998	0.754884679	0.373684324	0.465676301	0.625841848	0.793205847	0.558197576	1.150693656	0.535967063	0.629546934	0.105436144	0.530356505	0.173609714	0.233314519	0.565184308
FB7537	(B6N/Tyr<c-Brd>BrdCrCrlxDBA/1OlaHsd)F1_F006	F1	Final	0	FALSE	TRUE	(B6N/Tyr<c-Brd>BrdCrCrlxDBA/1OlaHsd)F1_F006	TRUE	XY	0.624888492	0.690900981	1.121	7793.03	2740	9	0	0.079378432	403.5378487	TRUE	0.215577188	0.370202493	1.058253019	0.905167552	0.391503572	0.477862768	0.679324783	0.644935089	0.622864091	1.323233314	0.509814387	0.672010557	0.108815152	0.554726301	0.216603746	0.308480691	0.660205139
PK5500	(B6N/Tyr<c-Brd>BrdCrCrlxDBA/1OlaHsd)F1_F008	F1	Final	0	FALSE	TRUE	(B6N/Tyr<c-Brd>BrdCrCrlxDBA/1OlaHsd)F1_F008	TRUE	XX	0.899728997	0.022131888	1.107	9184.99	2848	8	106	0.04593345	149.4245898	TRUE	0.254545624	0.431246885	1.038977285	0.994230385	0.465541954	0.616875752	0.754927014	0.730648283	0.625258991	1.37800854	0.598585048	0.816875885	0.149700699	0.6370173	0.212847175	0.333260973	0.758846451
RV3318	(BALB/cAnNCrlxFVB/NHsd)F1	F1	Final	0	FALSE	FALSE		TRUE	XY	0.623655914	0.619175627	1.116	16205.15	2406	11	0	0.053761256	207.1756886	TRUE	0.245168964	0.382902951	1.010172653	0.997460645	0.40110704	0.62683774	0.680462666	0.961299302	0.586418492	1.367528171	0.696260112	0.787897644	0.128662797	0.604499163	0.209809836	0.300706862	0.66361617
II1487	(BALB/cAnNCrlxFVB/NTac)F1_F001	F1	Final	0	FALSE	TRUE	(BALB/cAnNCrlxFVB/NTac)F1_F001	TRUE	XX	0.932025547	0.024635036	1.096	7724.87	2551	12	149	0.037447837	94.23907347	TRUE	0.242593169	0.384472632	0.931019248	0.844027461	0.374116467	0.518067162	0.69722882	0.716128821	0.654121282	1.247270642	0.568941824	0.630561006	0.151976724	0.555608261	0.229130154	0.331397285	0.670820599
MI4066	(BALB/cAnNCrlxFVB/NTac)F1_F002	F1	Final	0	FALSE	TRUE	(BALB/cAnNCrlxFVB/NTac)F1_F002	TRUE	XX	0.928801102	0.028020211	1.0885	8164.54	2552	10	149	0.033245113	76.84965926	TRUE	0.2128718	0.361073686	0.940285852	0.765138168	0.345518612	0.540140759	0.617916129	0.770404846	0.53352679	1.409020247	0.56206484	0.668255778	0.138280933	0.527770188	0.155918183	0.334740293	0.652455742
SB1956	(BALB/cByJxBALB/cJ)F1_F005	F1	Final	0	FALSE	TRUE	(BALB/cByJxBALB/cJ)F1_F005	TRUE	XX	0.941316794	0.027671756	1.048	9499.93	281	22	8	0.061034483	321.0580243	TRUE	0.205264744	0.327265687	0.98895501	0.812322066	0.415687423	0.439371816	0.606425739	0.739163606	0.569688613	1.236220079	0.54947793	0.697268546	0.135895787	0.662847227	0.164211795	0.305581309	0.616215288
SX7052	(BALB/cByJxBALB/cJ)F1_F022	F1	Final	0	FALSE	TRUE	(BALB/cByJxBALB/cJ)F1_F022	TRUE	XX	0.922602089	0.02374169	1.053	10346.59	288	12	8	0.031285965	97.39572123	TRUE	0.196199824	0.315659421	2.219860866	0.898943135	0.392109698	0.464887268	0.604256798	0.815630697	0.531672528	1.163184671	0.662053593	0.685442932	0.141012583	0.622523678	0.169041129	0.275356305	0.621847127
TD8567	(BALB/cJxBALB/cByJ)F1_F006	F1	Final	0	FALSE	TRUE	(BALB/cJxBALB/cByJ)F1_F006	TRUE	XX	0.883632923	0.028382214	1.057	14493.61	286	20	9	0.04052383	136.361761	TRUE	0.225892576	0.381754314	1.123253249	0.962423806	0.477313635	0.519608121	0.686992174	0.949797556	0.645387647	1.500384837	0.806424077	0.920267311	0.149859094	0.723422009	0.171868786	0.307031754	0.800559425
RL9778	(BALB/cJxDDK/Pas)F1_F001	F1	Final	0	FALSE	TRUE	(BALB/cJxDDK/Pas)F1_F001	TRUE	XX	0.896925859	0.024412297	1.106	15881.52	2651	21	129	0.052466506	181.1052311	TRUE	0.201869897	0.373453014	1.05197766	0.908036741	0.49812625	0.603846637	0.774422292	0.924219075	0.667316648	1.474796238	0.75735843	0.79003793	0.14645957	0.582627	0.209425851	0.274658919	0.693069857
PE7627	(BXD22/TyJxWSB/EiJ)F1	F1	Final	0	FALSE	FALSE		TRUE	XX	0.856373429	0.034111311	1.114	16113.67	3174	8	198	0.054479464	185.0197938	TRUE	0.201878244	0.389172601	1.179557267	1.002937075	0.367638094	0.585155231	0.757617463	0.746384766	0.589809663	1.42351158	0.682712132	0.83550163	0.166566618	0.599552941	0.212242114	0.327796153	0.692269233
YF6874	(BXD90/RwwJxWSB/EiJ)F1	F1	Final	0	FALSE	FALSE		TRUE	XX	0.847942755	0.025044723	1.118	16641.17	3239	10	201	0.058869976	237.8767606	TRUE	0.237543438	0.387472828	1.172754298	1.063266783	0.463248764	0.523340704	0.772782346	0.96279306	0.61924744	1.425741364	0.703676615	0.865263842	0.152333067	0.654821868	0.182559313	0.271615568	0.741834997
ZS6794	(C3H/HeJxDBA/1OlaHsd)F1_F007	F1	Final	0	FALSE	TRUE	(C3H/HeJxDBA/1OlaHsd)F1_F007	TRUE	XX	0.886052871	0.023701003	1.097	16258.28	2158	11	140	0.039721063	102.1991271	TRUE	0.222471239	0.407976701	1.175277974	1.087753348	0.459519664	0.560821884	0.714405153	0.964554594	0.610089084	1.534356517	0.687772572	0.892529761	0.162686322	0.638812907	0.202911976	0.29111318	0.828500853
TP7193	(C3H/HeJxDBA/2NCrl)F1_M005	F1	Final	0	FALSE	FALSE		TRUE	XX	0.883105023	0.029223744	1.095	14550.32	2215	19	138	0.033766747	101.4512713	TRUE	0.218276913	0.380953694	1.122586619	1.090078754	0.448374869	0.542530842	0.696341841	0.827129299	0.582804857	1.446840548	0.632219561	0.77029208	0.141440141	0.588921559	0.171680016	0.287141355	0.754416146
WX0240	(C3H/HeNHsdxA/JOlaHsd)F1_ F007	F1	Final	0	FALSE	TRUE	(C3H/HeNHsdxA/JOlaHsd)F1_ F007	TRUE	XX	0.90462963	0.025	1.08	8512.86	1806	6	59	0.019978036	30.86964759	TRUE	0.204749062	0.356401982	0.929652368	0.878200796	0.425473955	0.473871323	0.738647219	0.778116917	0.549169171	1.326698742	0.641382604	0.745108032	0.151183042	0.56902149	0.18912564	0.352173085	0.724550898
XI1306	(C3H/HeNHsdxA/JOlaHsd)F1_F003	F1	Final	0	FALSE	TRUE	(C3H/HeNHsdxA/JOlaHsd)F1_F003	TRUE	XX	0.912801484	0.023654917	1.078	8352.5	1807	4	59	0.019538766	31.11878569	TRUE	0.210356123	0.400119614	1.061238856	0.915773467	0.360849945	0.577312022	0.710206329	0.721939339	0.59443264	1.303441723	0.650583478	0.69045177	0.143908969	0.541035468	0.161029587	0.297156458	0.710326053
TT5711	(C3H/HeNTacxC57BL/6NJ)F1_F008	F1	Final	0	FALSE	TRUE	(C3H/HeNTacxC57BL/6NJ)F1_F008	TRUE	XX	0.893939394	0.023618538	1.122	17547.39	3127	15	166	0.069330112	341.4251052	TRUE	0.186067608	0.411058395	1.090133929	1.100961754	0.483034931	0.578148817	0.653145746	0.873919379	0.580200404	1.257338329	0.648871604	0.740167258	0.134435984	0.678106729	0.173701093	0.285512624	0.73264477
BZ8851	(C3H/HeNTacxFVB/NJ)F1_F001	F1	Final	0	FALSE	FALSE		TRUE	XY	0.639483066	0.671568627	1.122	14785.34	2528	22	0	0.061743905	257.9669468	TRUE	0.233609772	0.366308779	1.158580019	1.06084808	0.422513099	0.627513451	0.687572941	0.916651197	0.578072588	1.287964933	0.613648366	0.844282217	0.157047449	0.691969187	0.17841997	0.306722731	0.671070108
XR0123	(C57BL/10ScSnJxFVB/NHsd)F1_M001	F1	Final	0	FALSE	TRUE	(C57BL/10ScSnJxFVB/NHsd)F1_M001	TRUE	XY	0.638864241	0.691215617	1.127	11086.76	2700	23	0	0.063872172	277.2009892	TRUE	0.20132125	0.35772405	0.979095956	0.839560125	0.408866142	0.473086899	0.597920506	0.716259879	0.609736403	1.200350896	0.516471989	0.674317952	0.130876852	0.573657326	0.147653623	0.282859965	0.603332367
UI7852	(C57BL/10ScSnJxFVB/NHsd)F1_M001	F1	Final	0	FALSE	TRUE	(C57BL/10ScSnJxFVB/NHsd)F1_M001	TRUE	XY	0.654602324	0.688561215	1.119	9414.35	2705	19	0	0.057907973	247.7428374	TRUE	0.236978663	0.365824525	1.068050408	0.793363351	0.394079265	0.475019535	0.633607228	0.781147956	0.474594651	1.238216171	0.594517964	0.684380783	0.125234354	0.535565406	0.186948654	0.279891877	0.649115469
HV1931	(C57BL/6JxC57BL/6JBomTac)F1_F004	F1	Final	0	FALSE	TRUE	(C57BL/6JxC57BL/6JBomTac)F1_F004	TRUE	XX	0.905803996	0.030922931	1.051	9025.13	203	1	11	0.041481441	193.8216915	TRUE	0.231243151	0.409523089	0.886746018	1.023918525	0.425256931	0.517111541	0.770071826	0.737939333	0.590462268	1.330396031	0.619603115	0.766747775	0.186922471	0.636112569	0.254843914	0.331629493	0.688078567
WE9785	(C57BL/6JxC57BL/6JBomTac)F1_M002	F1	Final	0	FALSE	TRUE	(C57BL/6JxC57BL/6JBomTac)F1_M002	TRUE	XY	0.67074318	0.713076199	1.063	10046.23	194	2	0	0.033254997	143.9546058	TRUE	0.18862806	0.350778514	1.03859904	0.92820932	0.462263172	0.531841544	0.625508565	0.824986471	0.557920991	1.259975719	0.576534947	0.725446598	0.142740179	0.596542462	0.168023306	0.278114407	0.646212859
IS6916	(C57BL/6JxC57BR/cdJ)F1_F001	F1	Final	0	FALSE	FALSE		TRUE	XX	0.901109057	0.024029575	1.082	17321.5	1436	11	80	0.046346365	237.9765034	TRUE	0.223768131	0.374332447	1.145685904	1.085471724	0.48511961	0.573853257	0.720434084	0.884103499	0.613457214	1.474179368	0.618941727	0.869035521	0.137978801	0.622752021	0.175158026	0.290563727	0.694858934
JL4589	(C57BL/6JxNOD/ShiLtJ)F1_F0018	F1	Final	0	FALSE	TRUE	(C57BL/6JxNOD/ShiLtJ)F1_F0018	TRUE	XX	0.831607384	0.025664115	1.1105	8053.92	2936	10	138	0.058263782	243.2149039	TRUE	0.245594693	0.403778535	1.048309399	0.854739063	0.441399966	0.479145561	0.758140139	0.738894852	0.661292889	1.38119078	0.64751078	0.754291082	0.138441902	0.604674497	0.221879533	0.305689653	0.660051258
TE1377	(C57BL/6NCrlxDBA/2NCrl)F1	F1	Final	0	FALSE	TRUE	(C57BL/6NCrlxDBA/2NCrl)F1	TRUE	XX	0.887311446	0.025288376	1.127	15954.12	2974	35	107	0.086871294	548.9003763	FALSE	0.346054847	0.403908247	1.188971996	1.016163952	0.47567655	0.656068843	0.927848198	0.924714211	0.72445244	1.90759522	0.858712444	1.195866768	0.237806935	0.83802813	0.304936937	0.463516681	0.876262771
LK7292	(C57BL/6NCrlxDBA/2NCrl)F1	F1	Final	0	FALSE	TRUE	(C57BL/6NCrlxDBA/2NCrl)F1	TRUE	XX	0.856046931	0.022563177	1.108	14602.74	2977	22	108	0.05422908	199.5790895	FALSE	0.21002908	0.333019698	1.056582546	0.86120825	0.413552531	0.541610691	0.593518758	0.855866787	0.551334894	1.266200743	0.55044465	0.726986863	0.092106003	0.643235456	0.18955347	0.274263601	0.608105062
MX8193	(C57BL/6NCrlxDBA/2NCrl)F1	F1	Final	0	FALSE	TRUE	(C57BL/6NCrlxDBA/2NCrl)F1	TRUE	XX	0.84961729	0.027915353	1.1105	10571.41	2972	28	108	0.046683505	149.5055232	TRUE	0.224473267	0.438162735	1.069866264	1.027487831	0.484135768	0.565014253	0.739446913	0.92542013	0.647784631	1.346745005	0.595662941	0.750987469	0.156838043	0.554703428	0.205743512	0.296554442	0.721663106
TQ8860	(C57BL/6NCrlxDBA/2NCrl)F1_F004	F1	Final	0	FALSE	FALSE		TRUE	XX	0.913901345	0.022421525	1.115	9848.05	2982	17	108	0.052385241	192.5067666	TRUE	0.253857456	0.417544743	1.018476112	0.832449368	0.474814985	0.530663625	0.739740625	0.671402198	0.544270385	1.289697417	0.501419246	0.834683314	0.155056134	0.625200142	0.232838058	0.364133134	0.697701831
HE1289	(C57BL/6NCrlxDBA/2NCrl)F1_F005	F1	Final	0	FALSE	TRUE	(C57BL/6NCrlxDBA/2NCrl)F1_F005	TRUE	XX	0.844874101	0.024280576	1.112	14121.06	2975	27	107	0.054722161	225.0447815	TRUE	0.234118364	0.408609487	1.154445728	1.148143086	0.474893452	0.569291449	0.744773998	0.954673221	0.570353692	1.353722521	0.659511291	0.833294251	0.151263408	0.644285807	0.200055771	0.294737033	0.816015098
EV1483	(C57BL/6NCrlxDBA/2NCrl)F1_F005	F1	Final	0	FALSE	TRUE	(C57BL/6NCrlxDBA/2NCrl)F1_F005	TRUE	XX	0.899186257	0.028028933	1.106	8380.26	2980	20	108	0.047671865	141.3045511	TRUE	0.243787314	0.381969258	0.990423255	0.859997638	0.417529032	0.539243697	0.728736725	0.72587285	0.563944615	1.207958386	0.558097538	0.733151865	0.119686087	0.528265512	0.187345122	0.343306952	0.663344924
LU2506	(C57BL/6NHsdxBALB/cByJ)F1_F006	F1	Final	0	FALSE	TRUE	(C57BL/6NHsdxBALB/cByJ)F1_F006	TRUE	XX	0.887888339	0.026564611	1.1105	15761.59	2956	24	198	0.055429387	226.7499695	TRUE	0.237793303	0.414932819	1.143666513	1.128883738	0.475142489	0.539856782	0.802457231	0.899465225	0.576147542	1.271445518	0.61193074	0.791544625	0.134694553	0.632360154	0.18614876	0.283600872	0.751700923
CG0580	(C57BL/6NHsdxBALB/cByJ)F1_F006	F1	Final	0	FALSE	TRUE	(C57BL/6NHsdxBALB/cByJ)F1_F006	TRUE	XX	0.911870504	0.022482014	1.112	10714.38	2965	13	197	0.049990116	170.4750498	TRUE	0.212704813	0.355316903	1.037390959	0.817406209	0.381730006	0.487569084	0.656034282	0.708767156	0.531435368	1.375814676	0.554675166	0.880685658	0.165478558	0.579594949	0.192451656	0.286344171	0.612354663
HQ4593	(C57BL/6NHsdxBALB/cByJ)F1_F007	F1	Final	0	FALSE	TRUE	(C57BL/6NHsdxBALB/cByJ)F1_F007	TRUE	XX	0.937556561	0.023529412	1.105	9109.1	2962	18	198	0.040826927	119.4647263	TRUE	0.22878233	0.344929981	0.986706133	0.722903859	0.380498827	0.456576636	0.673941806	0.720159349	0.561746249	1.18936073	0.577993746	0.70896175	0.152045838	0.55647679	0.166975971	0.267973929	0.602255212
YZ3760	(C57BL/6NTacxC3H/HeJ)F1_F008	F1	Final	0	FALSE	FALSE		TRUE	XY	0.629188713	0.822751323	1.134	15229.34	3010	9	0	0.071691193	371.6112709	TRUE	0.227127396	0.376247464	1.087965835	0.955195787	0.492733154	0.437248144	0.68144785	0.831749848	0.512957276	1.334595063	0.748883478	0.771799772	0.157524898	0.634039357	0.165338763	0.254443093	0.72419429
JX1792	(DBA/1LacJxC3H/HeNTac)F1	F1	Final	0	FALSE	TRUE	(DBA/1LacJxC3H/HeNTac)F1	TRUE	XY	0.655017921	0.72625448	1.116	16776.06	1997	25	0	0.059092906	190.0775733	FALSE	0.411061916	0.438005069	1.398003931	1.401103585	0.5867885	0.810321299	1.093105193	1.079991268	1.00142694	2.228592204	0.914100127	1.309842595	0.19593395	0.886441669	0.276226931	0.44271416	1.160641902
VC5339	(DBA/1LacJxC3H/HeNTac)F1	F1	Final	0	FALSE	TRUE	(DBA/1LacJxC3H/HeNTac)F1	TRUE	XY	0.629963899	0.694043321	1.108	16406.83	1999	16	0	0.05045794	153.4554805	TRUE	0.225515779	0.394835464	1.141231743	0.964658983	0.475289742	0.579575553	0.773092471	0.935707633	0.614560973	1.494742965	0.738168001	0.800581016	0.146524306	0.690565886	0.220152161	0.306518609	0.837273043
RY9983	(DBA/1LacJxC3H/HeNTac)F1	F1	Final	0	FALSE	TRUE	(DBA/1LacJxC3H/HeNTac)F1	TRUE	XY	0.601174345	0.652213189	1.107	16455.35	2001	13	0	0.044162091	124.0024261	FALSE	0.174958276	0.313150399	0.868471249	0.880199956	0.34596647	0.41129476	0.583214511	0.644106554	0.489324085	1.263175662	0.475711492	0.651399015	0.126706497	0.547663767	0.194040214	0.233541041	0.606915007
XN7545	(DBA/1LacJxC3H/HeNTac)F1_F003	F1	Final	0	FALSE	TRUE	(DBA/1LacJxC3H/HeNTac)F1_F003	TRUE	XX	0.924563017	0.019779209	1.087	9606.53	2134	13	134	0.025065891	49.93774301	TRUE	0.216207182	0.32842256	1.043249097	0.876591563	0.398583196	0.520271302	0.671522642	0.685783781	0.579293676	1.799609896	0.666526039	0.684846917	0.167178013	0.613541227	0.166032958	0.279913872	0.639148818
XD0102	(DBA/1LacJxC3H/HeNTac)F1_M001	F1	Final	0	FALSE	TRUE	(DBA/1LacJxC3H/HeNTac)F1_M001	TRUE	XY	0.659315932	0.746174617	1.111	11155.17	1996	17	0	0.055895014	182.865756	TRUE	0.227248859	0.389415796	1.027146914	0.892949067	0.452704828	0.495644553	0.731947508	0.778293725	0.596763572	1.410735816	0.601066509	0.873854784	0.151768173	0.640330809	0.244819185	0.301474522	0.711508558
IS7468	(DBA/2JxC3H/HeJ)F1_F007	F1	Final	0	FALSE	TRUE	(DBA/2JxC3H/HeJ)F1_F007	TRUE	XX	0.897903373	0.027347311	1.097	17040.68	2231	15	141	0.052736657	193.1065277	TRUE	0.274578294	0.34816692	1.135107488	1.167324518	0.444759326	0.598098305	0.710183054	0.938108272	0.675677383	1.432161415	0.721274163	0.911994286	0.189429094	0.641171711	0.201341767	0.298286272	0.793454394
KV1129	(DBA/2JxDDK/Pas)F1_F001	F1	Final	0	FALSE	TRUE	(DBA/2JxDDK/Pas)F1_F001	TRUE	XX	0.908764045	0.021123596	1.1125	19965.72	2659	12	152	0.069827586	304.2555857	TRUE	0.191578331	0.319347305	1.066077067	0.988393932	0.420170097	0.530509199	0.684573237	0.930444617	0.593967956	1.50182386	0.691585255	1.000114018	0.146400905	0.661934439	0.195184512	0.2656052	0.714324225
CZ2127	(DBA/2JxFVB/NJ)F1_F008	F1	Final	0	FALSE	TRUE	(DBA/2JxFVB/NJ)F1_F008	TRUE	XX	0.854954955	0.024324324	1.11	15427.45	2839	24	129	0.049684823	175.8119828	TRUE	0.188624823	0.388657882	1.003146995	1.151194794	0.441809894	0.507601714	0.728960397	0.834875504	0.624795418	1.426937061	0.737646214	0.764740776	0.150057204	0.574301007	0.186356139	0.279890716	0.735960906
SK8121	(DBA/2NTacxFVB/NTac)F1_F003	F1	Final	0	FALSE	TRUE	(DBA/2NTacxFVB/NTac)F1_F003	TRUE	XX	0.929919137	0.018867925	1.113	10923.97	2685	18	123	0.052641116	186.6821449	TRUE	0.270780629	0.350605074	0.99212997	0.846486975	0.354632912	0.600605715	0.7692257	0.807215545	0.662121801	1.422925656	0.665234222	0.961646553	0.173563243	0.643904984	0.22089035	0.32186095	0.687753503
WE1914	(DBA/2NTacxFVB/NTac)F1_F004	F1	Final	0	FALSE	TRUE	(DBA/2NTacxFVB/NTac)F1_F004	TRUE	XX	0.871389892	0.022563177	1.108	16641.38	2681	22	123	0.05037338	179.3077962	TRUE	0.212302118	0.413908006	1.119378389	1.188603421	0.48373395	0.587691681	0.759973077	0.93976587	0.645739755	1.380534631	0.72836512	0.82204726	0.164349361	0.648263585	0.219212603	0.284471618	0.731730225
DL5535	(DBA/2NTacxFVB/NTac)F1_F004	F1	Final	0	FALSE	TRUE	(DBA/2NTacxFVB/NTac)F1_F004	TRUE	XX	0.911181244	0.019386835	1.109	9520.1	2686	16	121	0.044593675	126.572273	TRUE	0.216384233	0.363126357	1.0953664	0.796420028	0.433923916	0.545582382	0.669110469	0.649887986	0.556296553	1.33969151	0.572682932	0.864906688	0.1487379	0.529616167	0.220795951	0.318063815	0.656505562
MQ2334	(FVB/NCrlxC3H/HeNCrl)F1_F006	F1	Final	0	FALSE	TRUE	(FVB/NCrlxC3H/HeNCrl)F1_F006	TRUE	XX	0.948087432	0.02140255	1.098	9015.94	2573	6	161	0.032747639	89.59611727	TRUE	0.275844657	0.376887875	1.038715406	0.830085008	0.399736287	0.550247424	0.73048368	0.815998851	0.604928331	1.361587862	0.582967237	0.782946295	0.154947723	0.589400285	0.218612714	0.315884835	0.723163315
UY4077	(FVB/NCrlxC3H/HeNCrl)F1_F006	F1	Final	0	FALSE	TRUE	(FVB/NCrlxC3H/HeNCrl)F1_F006	TRUE	XX	0.934822242	0.018231541	1.097	10756.43	2572	7	161	0.035304195	83.63020413	TRUE	0.208247619	0.306607432	0.93014171	0.782787926	0.35253347	0.502304414	0.639989559	0.719383964	0.575098113	1.223361796	0.505465315	0.73602518	0.133966437	0.49040455	0.188724405	0.242645664	0.636084916
BN5517	(FVB/NTacxC3H/HeNTac)F1_F008	F1	Final	0	FALSE	FALSE		TRUE	XX	0.878500452	0.025293586	1.107	17432.46	2624	16	160	0.046468263	174.8881993	TRUE	0.229284964	0.38313592	1.154685273	1.279165726	0.576338762	0.665999107	0.652747962	1.040473023	0.639955731	1.478678637	0.778662521	0.935668512	0.159874204	0.668408406	0.196185783	0.267719021	0.852891879
FF6354	(NOD/MrkTacxA/JOlaHsd )F1_F009	F1	Final	0	FALSE	TRUE	(NOD/MrkTacxA/JOlaHsd )F1_F009	TRUE	XX	0.94967978	0.021043001	1.093	10772.92	2318	9	167	0.037254557	103.4977049	TRUE	0.239025358	0.333892899	0.996944602	0.878963542	0.42653263	0.453080689	0.644208151	0.823639614	0.576167146	1.331487278	0.578302129	0.758847497	0.153347531	0.590833556	0.156410769	0.235683645	0.672798368
NC8254	(NOD/MrkTacxA/JOlaHsd)F1_F007	F1	Final	0	FALSE	TRUE	(NOD/MrkTacxA/JOlaHsd)F1_F007	TRUE	XY	0.643050542	0.703068592	1.108	9784.12	2157	6	0	0.043392269	123.4174873	TRUE	0.184584728	0.309480928	1.111085591	0.855160808	0.375301839	0.535868067	0.631022209	0.674051097	0.630613384	1.141645299	0.522990062	0.635928116	0.140227158	0.528918033	0.142373492	0.223831979	0.633883988
DR0085	(NOD/ShiLtJxA/J)F1_F0018	F1	Final	0	FALSE	TRUE	(NOD/ShiLtJxA/J)F1_F0018	TRUE	XX	0.837874659	0.027247956	1.101	14018.2	2463	9	167	0.051691193	234.5707847	TRUE	0.215790903	0.385784199	1.064116661	0.992994832	0.454266601	0.576964239	0.75287841	0.861166208	0.570330006	1.471586954	0.667846093	0.824071574	0.136679461	0.614772232	0.205304535	0.33249633	0.675407692
FL9153	(NU/JxC57BL/6J)F1_F001	F1	Final	0	FALSE	TRUE	(NU/JxC57BL/6J)F1_F001	TRUE	XX	0.911020777	0.028003613	1.107	15157.56	2807	11	139	0.059008346	235.8019906	TRUE	0.228664768	0.391619753	1.040734771	1.041130613	0.450798142	0.624110994	0.746162299	0.775652533	0.698133461	1.270323171	0.661320149	0.801382267	0.154510354	0.655514465	0.198712718	0.313968734	0.765096744
KZ8184	(NZO/HlLtJxNOD/ShiLtJ)F1_F0042	F1	Final	0	FALSE	TRUE	(NZO/HlLtJxNOD/ShiLtJ)F1_F0042	TRUE	XX	0.812219227	0.023360288	1.113	15358.36	2510	14	138	0.063246211	329.9626725	TRUE	0.234985969	0.372826172	1.160475178	1.149536513	0.534822595	0.573563701	0.714529238	0.881148549	0.74181079	1.585780899	0.746824345	0.928809876	0.184720198	0.780617007	0.217405971	0.323862623	0.729179236
GC5879	129;B6;FVB-Btbd18tm1Dean Tg(Btbd18/mCherry)#Dean/Mmnc_M_38874	UNCLASSIFIED	Final	0	FALSE	FALSE		TRUE	XY	0.635637047	0.707569346	1.0635	9417.6	723	4	0	0.017793762	85.54846812	FALSE	0.196759202	0.354336459	0.923589606	0.832483619	0.378015521	0.503100432	0.661633345	13.30922567	0.524655811	1.168025485	0.482819262	0.638591388	0.118501495	0.482182157	5.760595509	0.28117559	0.606417595
UY4411	129;B6;FVB-Btbd18tm1Dean Tg(Btbd18/mCherry)#Dean/Mmnc_M_39479	UNCLASSIFIED	Final	0	FALSE	FALSE		TRUE	XY	0.59180791	0.633239171	1.062	6903.08	533	12	0	0.044616736	255.7852032	FALSE	0.266837523	0.323044341	0.794862914	0.708090017	0.387653209	0.457622006	0.774002652	13.48152401	0.43560284	1.086761725	0.423144628	0.624504105	0.094160907	0.448785367	4.806407259	0.32695564	0.586405153
UQ2926	129P2/OlaHsd_7601	CELL LINE	Final	129P2/OlaHsd	FALSE	FALSE		TRUE	XY	0.639359699	0.677966102	1.062	14017.1	0	8	0	0.022576323	57.10182754	FALSE	0.157022522	0.317255409	0.866798565	0.806086994	0.4194877	0.527569991	0.520293163	0.771985783	0.487404757	1.098372897	0.666329102	0.635010208	0.124419481	0.513801091	0.167652397	0.203893852	0.576795588
UU8972	129P2/OlaHsd_7602	CELL LINE	Final	129P2/OlaHsd	FALSE	FALSE		TRUE	XY	0.611320755	0.658490566	1.06	14236.53	0	4	0	0.02223479	62.60712162	FALSE	0.214026826	0.337020253	0.940116521	0.916234302	0.400167649	0.462682869	0.625643892	0.839811201	0.532924689	1.263790828	0.598109098	0.674110748	0.139921706	0.627821388	0.159097723	0.1983629	0.636952825
KB3616	129P3/J	INBRED	Final	129P3/J	FALSE	TRUE	129P3/J	TRUE	XY	0.640818268	0.662226451	1.051	4743.26	0	6	0	0.031503404	108.0032755	TRUE	0.303166738	0.464237245	1.083009412	0.902542981	0.516943562	0.595581388	0.972326145	0.743369902	0.700150722	1.439936594	0.57365556	0.766771507	0.158118952	0.695090915	0.207452066	0.348072521	0.874292395
KM9602	129S;B6-Gt(ROSA)26Sortm4(ACTB-tdTomato,-EGFP)Luo Rb1tm3Tyj Rbl2tm2Tyj Trp53tm1Brn/Mmucd_M_5343	UNCLASSIFIED	Final	0	FALSE	FALSE		TRUE	XY	0.622117647	0.694588235	1.0625	6885.9	332	6	0	0.02754228	140.2933752	FALSE	0.252109229	0.36872427	1.13478198	1.009017814	0.472995253	0.606165854	0.796700018	18.47789286	0.642326683	37.48672543	10.53775916	13.08252299	0.149435713	0.607908545	8.10902946	0.318476693	0.741660043
TF9562	129S;B6-Gt(ROSA)26Sortm4(ACTB-tdTomato,-EGFP)Luo Rb1tm3Tyj Rbl2tm2Tyj Trp53tm1Brn/Mmucd_M_5346	UNCLASSIFIED	Final	0	FALSE	FALSE		TRUE	XY	0.603853383	0.717105263	1.064	6840.17	270	6	0	0.034468482	223.4828851	FALSE	0.270461161	0.40422979	1.101434805	0.937696156	0.389610268	0.433030249	0.788138444	18.82073434	0.687702326	38.73369319	10.90119295	12.38624402	0.177481	0.587997184	7.622180308	0.326892517	0.635656827
MU6453	129S1/SvImJ_1001	INBRED	Final	129S1/SvImJ	FALSE	FALSE		TRUE	XY	0.642891108	0.697099382	1.0515	5756.1	4	1	0	0.022149132	80.83860501	TRUE	0.242351621	0.401487166	1.12975813	0.946821745	0.431542241	0.564792201	0.84935991	0.744427739	0.652351496	1.34135976	0.551936272	0.754851465	0.132728773	0.545160851	0.222546542	0.322961766	0.716109951
LK7757	129S1/SvImJ_1002	INBRED	Final	129S1/SvImJ	FALSE	TRUE	129S1/SvImJ_1002	TRUE	XY	0.653992395	0.676330798	1.052	5761.1	3	0	0	0.02551834	81.2592546	TRUE	0.245612812	0.392633343	0.995643172	0.865112547	0.423703798	0.48810122	0.815989985	0.881255297	0.705073669	1.32665634	0.504417549	0.750377516	0.144937596	0.521775344	0.246480702	0.357397017	0.766346689
JL3082	129S1/SvImJ_1002	INBRED	Final	129S1/SvImJ	FALSE	TRUE	129S1/SvImJ_1002	TRUE	XY	0.649197356	0.717186025	1.059	7250.3	3	0	0	0.024960466	76.85461853	TRUE	0.222059726	0.371846597	1.031543285	0.922306451	0.401638461	0.582596448	0.629353123	0.800932191	0.646042084	1.320496779	0.540115457	0.702177679	0.154890107	0.616112295	0.14951102	0.28702254	0.616801922
VV0940	129S2/SvHsd_Mxxx	INBRED	Final	129S2/SvHsd	FALSE	TRUE	129S2/SvHsd_M001	TRUE	XY	0.578544061	0.660440613	1.044	5744.06	1	3	0	0.052152427	514.9605786	TRUE	0.289168109	0.346966912	0.915379842	0.670953578	0.327990799	0.523148807	0.867852513	0.616810723	0.548044074	1.053957696	0.42948689	0.663989866	0.117338534	0.567368373	0.275066594	0.321027088	0.730841494
VK0705	129S2/SvHsd_Mxxx	INBRED	Final	129S2/SvHsd	FALSE	TRUE	129S2/SvHsd_M001	TRUE	XY	0.644561069	0.698473282	1.048	5652.55	0	2	0	0.027052493	131.7523791	TRUE	0.331177887	0.450239168	1.111710385	1.032277227	0.427240703	0.570008094	0.861380946	0.6926076	0.572131029	1.396006787	0.574253964	0.753818897	0.113930854	0.569654271	0.231399934	0.378767017	0.752580519
FP7411	129S2/SvPasOrlRj	INBRED	Final	129S2/SvPasOrlRj	FALSE	TRUE	129S2/SvPasOrlRj_M001	TRUE	XY	0.669047619	0.704285714	1.05	7414.45	1	1	0	0.032962882	121.752579	TRUE	0.21741323	0.378450076	0.903640595	0.915239564	0.415944417	0.451011067	0.621219191	0.69984941	0.588715104	1.26482709	0.537463847	0.578869468	0.131499937	0.51979565	0.180593247	0.246410652	0.651430459
XV5409	129S2/SvPasOrlRj	INBRED	Final	129S2/SvPasOrlRj	FALSE	TRUE	129S2/SvPasOrlRj_M001	TRUE	XY	0.683031459	0.721639657	1.049	6897.46	1	2	0	0.026314518	93.38433577	TRUE	0.264590276	0.362017489	0.960064002	0.80913881	0.354188517	0.505258691	0.607905219	0.700983004	0.644585405	1.13853558	0.530920323	0.656618826	0.106416034	0.505693633	0.178181616	0.332441371	0.518161997
TG6013	129S2/SvPasOrlRj	INBRED	Final	129S2/SvPasOrlRj	FALSE	TRUE	129S2/SvPasOrlRj_M001	TRUE	XY	0.650808754	0.696479543	1.051	5957.15	1	2	0	0.02449374	79.33833873	TRUE	0.266570445	0.397673416	1.024986862	0.961030099	0.423860437	0.550095307	0.808440342	0.83059859	0.631510084	1.294411021	0.483116965	0.680191085	0.14872885	0.566210397	0.248440969	0.335059577	0.79165379
SB4321	129S4/SvJaeJ_F001	INBRED	Final	129S4/SvJaeJ	FALSE	FALSE		TRUE	XX	0.900671785	0.033109405	1.042	5682.27	1	3	0	0.031528662	109.1195286	TRUE	0.261867156	0.429757793	1.104136114	0.958419713	0.461259285	0.562451231	0.814463171	0.824846345	0.642348871	1.465435356	0.615774986	0.726646161	0.151347953	0.5703706	0.215758826	0.34686839	0.744596733
JH3101	129S4/SvJaeJ_M001	INBRED	Final	129S4/SvJaeJ	FALSE	TRUE	129S4/SvJaeJ_M001	TRUE	XY	0.666508539	0.712998102	1.054	5673.83	0	2	0	0.020243795	76.0505499	TRUE	0.259260445	0.415944698	1.103487183	0.844050491	0.466527803	0.632376939	0.845284225	0.784654998	0.605411033	1.435361703	0.595893654	0.798226075	0.139411973	0.549716743	0.170431577	0.34756057	0.811973399
MN8189	129S4/SvJaeJ_M001	INBRED	Final	129S4/SvJaeJ	FALSE	TRUE	129S4/SvJaeJ_M001	TRUE	XY	0.669201521	0.735741445	1.052	6380.07	0	1	0	0.025765429	74.36422921	TRUE	0.248743407	0.417080156	1.021932587	0.896855562	0.428992253	0.547956492	0.784004111	0.80077509	0.590275786	1.231961677	0.569272877	0.778675014	0.13636217	0.61754822	0.192317682	0.322410327	0.700619427
LE0235	129S6/SvEvTac_F1001	INBRED	Final	129S6/SvEvTac	FALSE	FALSE		TRUE	XX	0.870565676	0.028763183	1.043	6430.66	0	1	0	0.036188228	119.635204	TRUE	0.24398725	0.386429775	1.013581197	0.914991065	0.487818996	0.557796219	0.854810653	0.782189847	0.594650889	1.324435571	0.63057253	0.754976482	0.163435692	0.686398804	0.192515115	0.336357185	0.749844819
BI9675	129S6/SvEvTac_F1002	INBRED	Final	129S6/SvEvTac	FALSE	TRUE	129S6/SvEvTac_F1002	TRUE	XX	0.906340058	0.036023055	1.041	5040.04	0	2	0	0.036316714	104.2124547	TRUE	0.33372724	0.428766091	1.114077557	0.915071361	0.410512282	0.621819958	0.968840732	0.779159851	0.709914425	1.340662876	0.655946643	0.827175304	0.15039551	0.674398863	0.243251841	0.383528391	0.886301771
MX8748	129S6/SvEvTac_F1002	INBRED	Final	129S6/SvEvTac	FALSE	TRUE	129S6/SvEvTac_F1002	TRUE	XX	0.884245917	0.041786744	1.041	4845.25	0	3	0	0.036895454	97.91951219	TRUE	0.30751765	0.491409076	1.133893938	0.99643974	0.474898062	0.665600282	0.934110659	0.862081357	0.70502033	1.477323044	0.53743353	0.778287958	0.127547589	0.718848304	0.229503105	0.376657524	0.876734883
ZB3675	129T2/SvEmsJ_F1001	INBRED	Final	129T2/SvEmsJ	FALSE	FALSE		TRUE	XX	0.889367816	0.022030651	1.044	7015.28	0	2	0	0.031232155	123.0851423	TRUE	0.270267065	0.391573644	1.052131439	0.953489662	0.427210124	0.487507048	0.694056087	0.678376036	0.584723366	1.28448129	0.624351132	0.722422725	0.15480487	0.595556856	0.215671978	0.301484622	0.651577403
WP2407	129T2/SvEmsJ_F1002	INBRED	Final	129T2/SvEmsJ	FALSE	TRUE	129T2/SvEmsJ_F1002	TRUE	XX	0.893027698	0.032951289	1.047	5489.33	0	1	0	0.031072919	110.5511529	TRUE	0.279086904	0.431746712	1.019614493	0.999211273	0.464901945	0.548336542	0.898288202	0.961319578	0.726682546	1.461198472	0.654542589	0.842361518	0.170876969	0.760202122	0.241741724	0.384928609	0.759291264
TI0700	129T2/SvEmsJ_F1002	INBRED	Final	129T2/SvEmsJ	FALSE	TRUE	129T2/SvEmsJ_F1002	TRUE	XX	0.916026871	0.025911708	1.042	5897.19	0	1	0	0.031032286	97.31199873	TRUE	0.243505747	0.390355314	1.016755196	0.891950022	0.370345788	0.562640717	0.769349287	0.781728061	0.604016345	1.332837865	0.527200117	0.747135322	0.127179186	0.54856622	0.216713332	0.37797654	0.824629839
MV6476	129X1/SvJ_1002	INBRED	Final	129X1/SvJ	FALSE	FALSE		TRUE	XY	0.645575642	0.728353949	1.051	5312.46	0	2	0	0.023779925	71.69099448	TRUE	0.284613863	0.463062237	1.192479379	1.041513561	0.57976898	0.693652173	0.86795934	0.82372372	0.688381545	1.584764624	0.649981262	0.834641447	0.190119049	0.646028292	0.253366574	0.405085339	0.973936592
PG2454	129X1/SvJ_F999	INBRED	Final	129X1/SvJ	FALSE	TRUE	129X1/SvJ_F999	TRUE	XX	0.926371511	0.025505294	1.039	7383.71	0	2	0	0.033910608	107.6193804	TRUE	0.250145243	0.337905999	0.916341479	0.863116205	0.4022368	0.53157557	0.71156638	0.740549099	0.67919783	1.338486969	0.620555226	0.805150767	0.144371862	0.560422855	0.227121587	0.295109087	0.676895464
VT1326	129X1/SvJ_M1001	INBRED	Final	129X1/SvJ	FALSE	TRUE	129X1/SvJ_M001	TRUE	XY	0.672068637	0.738322212	1.049	5481.96	0	2	0	0.027967274	95.22658863	TRUE	0.258301547	0.39493139	1.022078789	0.860457906	0.394566557	0.622586991	0.72948297	0.754474009	0.563484094	1.342037061	0.542871047	0.722368732	0.158154972	0.577530153	0.215798538	0.341300984	0.827987797
VL5293	A/J_M1001	INBRED	Final	A/J	FALSE	FALSE		TRUE	XY	0.654467681	0.682034221	1.052	5595.66	4	5	0	0.030617175	71.60437961	TRUE	0.276106683	0.44445134	1.111753834	0.948413052	0.39262549	0.585274684	0.821529075	0.742896751	0.711443821	1.375886958	0.587419201	0.75433418	0.140108504	0.642104409	0.23732665	0.349377712	0.752368372
QQ8233	A/J_M1002	INBRED	Final	A/J	FALSE	FALSE		TRUE	XY	0.673003802	0.789448669	1.052	5260.58	1	5	0	0.026562706	58.95555108	TRUE	0.333993798	0.443297403	1.120599568	0.95046613	0.493672108	0.630919417	0.849906814	0.807896211	0.762844116	1.395664466	0.602025247	0.837360661	0.157777378	0.742504141	0.2357156	0.438735166	0.843443644
LC8024	A/J_M1003	INBRED	Final	A/J	FALSE	FALSE		TRUE	XY	0.664448669	0.70960076	1.052	4282.94	3	9	0	0.028271469	64.09481183	TRUE	0.328746254	0.515533898	1.18353321	0.984370884	0.536780992	0.58791411	1.128897824	0.777270084	0.783107198	1.508777195	0.637412835	0.925532776	0.156434652	0.756022989	0.314970665	0.455294882	0.922964446
SH6986	A/JCrl	INBRED	Final	A/JCr	FALSE	TRUE	A/JCrl_F1001	TRUE	XX	0.905508072	0.024691358	1.053	19204.31	1	13	0	0.069868219	559.2312329	TRUE	0.206359965	0.390537406	1.209936955	1.126049521	0.458542986	0.663444945	0.832157105	0.912659882	0.779720949	1.741900974	0.768317257	1.050701837	0.189853251	0.773836852	0.194591771	0.255567678	0.834135828
CQ1039	A/JCrl_F1001	INBRED	Final	A/JCr	FALSE	TRUE	A/JCrl_F1001	TRUE	XX	0.924373796	0.032755299	1.038	5283.4	1	7	0	0.038279157	105.0499166	TRUE	0.301321332	0.416966642	1.012227691	0.891472031	0.476776655	0.583147628	0.802892645	0.752356969	0.649582168	1.245600305	0.494378969	0.709959998	0.177348045	0.643525458	0.229587171	0.381762014	0.702010566
ID4742	A/JCrl_F1001	INBRED	Final	A/JCr	FALSE	TRUE	A/JCrl_F1001	TRUE	XX	0.916786917	0.022607023	1.0395	7467.27	1	6	0	0.035273446	95.10125592	TRUE	0.213866773	0.345775835	0.868323203	0.89751729	0.382603238	0.532055535	0.688873313	0.709094905	0.661955829	1.204858708	0.435366862	0.566070663	0.135926596	0.454784947	0.187083207	0.2726567	0.667178624
ES1832	A/JOlaHsd_F1002	INBRED	Final	A/JOlaHsd	FALSE	FALSE		TRUE	XX	0.891969407	0.035372849	1.046	4720.94	2	5	0	0.043782122	154.6466301	TRUE	0.305447699	0.47702373	1.131342692	0.943879992	0.488462132	0.604328908	1.005943914	0.830978727	0.713417372	1.448016971	0.637373181	0.758747336	0.138108114	0.603481619	0.203561192	0.373442645	0.815727524
EM5446	A/JOlaHsd_M001	INBRED	Final	A/JOlaHsd	FALSE	TRUE	A/JOlaHsd_M001	TRUE	XY	0.564102564	0.618233618	1.053	6432.09	2	8	0	0.063821656	628.836339	TRUE	0.23133991	0.365199898	0.9334441	0.865348078	0.353695091	0.469054105	1.400010679	0.828968011	0.649399734	1.199609372	0.495639539	0.648933323	0.110694903	0.541192357	0.211284232	0.332862061	0.690754853
ID6743	A/JOlaHsd_M1001	INBRED	Final	A/JOlaHsd	FALSE	TRUE	A/JOlaHsd_M001	TRUE	XY	0.626901141	0.720532319	1.052	4895.85	2	5	0	0.028690973	82.04228919	TRUE	0.322518258	0.444458347	1.059877923	1.010039763	0.395437206	0.692832129	0.863589104	0.824576446	0.685274703	1.460012988	0.581309033	0.783316985	0.148697462	0.730415004	0.228152561	0.367045795	0.877682682
QE6853	A/WySnJ_M1001	INBRED	Final	A/WySnJ	FALSE	TRUE	A/WySnJ_M1001	TRUE	XY	0.64952381	0.707142857	1.05	5243.25	1	6	0	0.0325906	118.5782086	TRUE	0.260143907	0.420921997	0.938348992	0.941019091	0.451055969	0.60496809	0.836313075	0.674199936	0.72321532	1.368234892	0.510942469	0.702998858	0.148381202	0.525628012	0.242978987	0.334334509	0.768797721
ZS5867	AKR/J	INBRED	Final	AKR/J	FALSE	TRUE	AKR/J_MjaxDNA	TRUE	XY	0.692234848	0.723958333	1.056	10410.54	4	10	0	0.042712497	240.4364604	TRUE	0.372026676	0.49814881	1.581569641	1.057485587	0.52638941	0.707263727	0.959988278	0.931459509	0.784589179	1.679931458	0.659427609	0.953648552	0.184908689	0.759806612	0.236491009	0.41995885	0.864604212
BZ1177	ALS/LtJ	INBRED	Final	ALS/LtJ	FALSE	TRUE	ALS/LtJ	TRUE	XY	0.66855257	0.700141443	1.0605	10343.25	4	12	1	0.031843839	123.6262609	TRUE	0.36806615	0.541029203	3.274309507	1.102264821	0.461750442	0.690305308	1.075290706	0.845672344	0.859691149	1.720155749	0.701423671	1.101007962	0.19123584	0.746960618	0.315278097	0.455176105	1.009837387
YF7952	B6(129S)-Stktm1.1Bwh/Mmmh_M_383SR	UNCLASSIFIED	Final	0	FALSE	FALSE		TRUE	XY	0.647556391	0.71287594	1.064	8889.88	218	1	0	0.013127608	42.00732236	FALSE	0.248822166	0.360522172	1.11879985	0.955580608	0.440613213	0.664800635	0.669187644	0.799335585	0.686960656	1.36919684	0.705858542	0.699446759	0.166031428	0.665138097	0.195503131	0.348710993	0.732293085
HN1979	B6(129S)-Stktm1.1Bwh/Mmmh_M_481AG	UNCLASSIFIED	Final	0	FALSE	FALSE		TRUE	XY	0.533301842	0.638167218	1.0585	5694.13	160	42	1	0.098370305	2005.100046	FALSE	0.2822204	0.443790262	1.367899624	1.231618958	0.649264978	0.658397187	0.839460804	4.000785896	0.921650691	1.894406631	1.00875792	0.964677447	0.164906631	0.745504417	0.251135764	0.379337937	2.90070588
PV8351	B6(129S4)-Prdx6tm4.1Abf/Mmnc_M_33397	UNCLASSIFIED	Final	0	FALSE	FALSE		TRUE	XY	0.640698772	0.694995279	1.059	9613.56	54	3	0	0.018787613	65.3568844	FALSE	0.182450701	0.34669794	0.849529575	0.855562722	0.349714513	0.469857364	0.59176855	0.57252489	0.469441285	1.075564565	0.494093973	0.62089409	0.132937284	0.485356311	0.198781807	0.277524783	0.603210727
DS2217	B6(129S4)-Prdx6tm4.1Abf/Mmnc_M_33398	UNCLASSIFIED	Final	0	FALSE	FALSE		TRUE	XY	0.601244615	0.661081857	1.0445	6880.36	49	10	0	0.05075884	339.499848	FALSE	0.21612232	0.352452338	0.897336386	0.7003991	0.316262387	0.487183603	0.68426623	0.469015957	0.409716759	1.044857674	0.395182642	0.590811858	0.130516371	0.446924099	0.191414321	0.328761727	0.584126164
TT3143	B6(Cg)-Cux2tm1.1(cre)Mull/Mmmh_M_957AB	UNCLASSIFIED	Final	0	FALSE	FALSE		TRUE	XY	0.638559924	0.603505448	1.0555	8166.04	48	1	0	0.018958928	64.45783091	FALSE	0.189198143	0.349006284	20.39127382	0.896272629	4.940826856	0.529632343	0.652335605	0.847411749	0.701074027	1.168864905	0.50097709	0.639477479	0.098701426	0.599556058	0.17389085	0.281286819	2.15428721
VP4508	B6.129P2-Izumo1rtm1Salb/Mmmh_M_618AG	UNCLASSIFIED	Final	0	FALSE	FALSE		TRUE	XY	0.561971831	0.663380282	1.065	9207.16	6	6	0	0.051155282	478.5507646	FALSE	0.211465885	0.354941198	1.278353091	1.078617209	0.476042617	0.514273737	0.753109629	0.856072988	0.743117404	1.550858436	0.818384923	0.923411893	1.411510346	0.659921273	0.195825881	0.306500631	7.313874016
II2513	B6.129S2-Rbp1tm1Ipc/Mmucd_M_2L	UNCLASSIFIED	Final	0	FALSE	FALSE		TRUE	XY	0.581852198	0.512160898	1.069	8369.17	19	7	0	0.043021085	349.8104506	FALSE	0.189863486	0.354156936	1.135476843	1.057810848	0.468983122	0.531713349	0.703773398	0.892680995	0.583092391	1.391655139	0.777615836	0.771761015	0.141949541	0.59551895	0.176600523	0.291665682	0.745235091
HX5727	B6.129S2-Rbp1tm1Ipc/Mmucd_M_2L2R	UNCLASSIFIED	Final	0	FALSE	FALSE		TRUE	XY	0.520833333	0.642045455	1.056	6222.73	68	37	2	0.098474632	1959.469087	FALSE	0.268531494	0.439517437	1.39343901	1.028968975	0.540116309	0.656463886	0.718012397	15.0869382	0.921138554	1.59993989	0.705477713	0.83660979	0.146880781	0.742921064	0.202161951	0.349524835	0.824075106
IJ4438	B6.129S7-Bbs1Gt1Nk/Mmmh_M_8016.1	UNCLASSIFIED	Final	0	FALSE	FALSE		TRUE	XY	0.63027179	0.67760075	1.067	8203.84	424	4	0	0.02219855	84.05300116	FALSE	0.221603541	0.387135779	1.127398873	1.05158072	0.504641727	0.501472479	0.720150561	0.951018057	0.885073328	39.10741786	12.31923095	19.22538707	0.120431407	0.684435579	0.196615243	0.328870382	1.112405894
UY8135	B6.129X1-Gt(ROSA)26Sortm2(ECFP)Cos/Mmnc_M_32587	UNCLASSIFIED	Final	0	FALSE	FALSE		TRUE	XY	0.680358829	0.774315392	1.059	9725.98	28	3	0	0.032832199	172.6558463	FALSE	0.360477924	0.535473197	1.275347453	0.957333129	0.442937506	0.728461521	1.084826748	13.01257446	0.680754231	32.71486246	0.59263969	1.146105938	0.210878557	0.771027939	0.264137988	0.58945235	0.922272384
NR3313	B6.129X1-Gt(ROSA)26Sortm2(ECFP)Cos/Mmnc_M_32588	UNCLASSIFIED	Final	0	FALSE	FALSE		TRUE	XY	0.671052632	0.748120301	1.064	10521.24	43	6	0	0.028600922	182.1014841	FALSE	0.270880611	0.471997583	1.281597949	1.055198786	0.463443459	0.714364446	0.99313386	13.40364785	0.936296455	32.58807801	0.65980814	1.072592172	0.26451254	0.890959595	0.305857475	0.450992455	1.000072205
KK6859	B6.129X1-Ptpn11tm1Yan/Mmnc_F_39807	UNCLASSIFIED	Final	0	FALSE	FALSE		TRUE	XX	0.906368821	0.048003802	1.052	9461.84	219	3	1	0.037814628	191.7879022	FALSE	0.357012901	0.521779957	1.203676712	1.140898244	0.566802898	0.772682452	0.998431284	0.866850153	0.76644688	1.695124312	0.695319088	1.053917304	0.201440672	0.807876441	0.340419939	0.463334683	0.904263583
PS6245	B6.129X1-Ptpn11tm1Yan/Mmnc_M_39808	UNCLASSIFIED	Final	0	FALSE	FALSE		TRUE	XY	0.657156221	0.725444341	1.069	9457.27	254	3	0	0.026949264	153.4122588	FALSE	0.372729051	0.493059735	1.328078549	1.111631352	0.560626789	0.691108392	1.108353452	0.908718714	0.803931625	1.809401284	0.685609977	1.096616452	0.196779791	0.802768499	0.367442115	0.474555456	0.892857904
XJ9730	B6.CC027-Ccgss1/f-0139	CROSS	Final	0	FALSE	FALSE		TRUE	XX	0.840994371	0.032833021	1.066	18817.84	256	15	0	0.028510872	154.4884843	FALSE	0.218994368	0.360349627	1.296854784	1.083918498	0.531517028	0.660809262	0.728882979	1.049961351	0.772883789	1.834961305	0.767144552	1.133339697	0.231163674	0.778569883	0.268149862	0.303594959	0.816512611
VC2248	B6.CC027-Ccgss1/f-0140	CROSS	Final	0	FALSE	FALSE		TRUE	XX	0.880794702	0.037842952	1.057	14402.34	334	5	0	0.02631342	88.71677838	FALSE	0.263290605	0.37007883	1.104473537	1.280972672	0.482560576	0.575462166	0.732658878	1.027124979	0.663156268	1.343601397	0.778554207	0.830837389	0.171083347	0.619760533	0.184206217	0.278357604	0.795981935
QS3757	B6.CC027-Ccgss1/f-0141	CROSS	Final	0	FALSE	FALSE		TRUE	XX	0.861531191	0.032608696	1.058	16082.9	324	4	0	0.027576323	116.3524741	FALSE	0.233850843	0.411865989	1.080775154	1.209172386	0.480759032	0.604990349	0.74377128	1.052235527	0.715977787	1.473676902	0.690049629	0.878697185	0.160978419	0.681904333	0.160045751	0.260649491	0.745139192
YE2032	B6.CC027-Ccgss1/m-0136	CROSS	Final	0	FALSE	FALSE		TRUE	XY	0.623590226	0.687969925	1.064	15590.44	207	3	0	0.023051834	88.43260468	FALSE	0.213464144	0.467465949	1.186239746	1.242684592	0.469326064	0.504988943	0.755334663	0.886184078	0.680930093	1.455763884	0.843273166	0.903694808	0.149322274	0.800105688	0.201405472	0.253616954	0.790291982
AJ9883	B6.CC027-Ccgss1/m-0137	CROSS	Final	0	FALSE	FALSE		TRUE	XY	0.657585721	0.695631752	1.0645	16549.71	104	4	0	0.034234571	157.0449516	FALSE	0.197223988	0.46357305	1.195005763	1.026181062	0.505990709	0.584118962	0.740979707	0.863700883	0.569617198	1.563471412	0.735239426	0.794938353	0.159156858	0.694755335	0.185078761	0.308766721	0.719347909
HG8122	B6.CC027-Ccgss1/m-0138	CROSS	Final	0	FALSE	FALSE		TRUE	XY	0.641588785	0.714953271	1.07	17323.34	357	4	0	0.028444981	159.2141158	FALSE	0.225476153	0.400442415	1.259687817	1.263382255	0.507061579	0.689878522	0.637348235	1.037732925	0.660727099	1.606503159	0.720588535	0.808100529	0.154473678	0.692476173	0.179699761	0.257802483	0.78270127
GB3241	B6.CC027-Ccgss4/f-0153	CROSS	Final	0	FALSE	FALSE		TRUE	XX	0.85694051	0.030217186	1.059	16137.18	212	2	0	0.031103668	102.7202782	FALSE	0.199910962	0.434772261	1.307787028	1.215949444	0.474308279	0.629601791	0.694606937	1.016968012	0.735444297	1.513027297	0.828707161	0.848227295	0.145688367	0.731664208	0.173574273	0.298751007	0.864648996
MY2512	B6.CC027-Ccgss4/f-0154	CROSS	Final	0	FALSE	FALSE		TRUE	XX	0.840545626	0.032925682	1.063	16923.42	325	5	0	0.016671425	52.89160223	FALSE	0.229563496	0.400569096	1.26481509	1.240292864	0.512780442	0.627059927	0.752211918	1.143326661	0.730762356	1.716142241	0.745298423	0.919731226	0.202736771	0.789970238	0.169941986	0.24262232	0.804092677
BS9638	B6.CC027-Ccgss4/f-0155	CROSS	Final	0	FALSE	FALSE		TRUE	XX	0.854853911	0.030160226	1.061	18553.49	95	13	0	0.041790029	258.8463922	FALSE	0.249764323	0.381868844	1.282939182	1.181933929	0.446492803	0.573584791	0.861401252	0.856873802	0.837470445	1.779449527	0.825343347	1.238419257	0.192093234	0.791441371	0.213059639	0.285337144	0.893093402
WW8820	B6.CC027-Ccgss4/m-0150	CROSS	Final	0	FALSE	FALSE		TRUE	XY	0.624647225	0.677328316	1.063	16642.47	316	2	0	0.024233472	125.3970213	FALSE	0.196244887	0.438877115	1.247771381	1.134326694	0.448551159	0.574073378	0.677243149	0.945772972	0.629413716	1.450325427	0.759983262	0.872526641	0.14589179	0.70368153	0.213790358	0.248821212	0.663543261
KU0493	B6.CC027-Ccgss4/m-0151	CROSS	Final	0	FALSE	FALSE		TRUE	XY	0.627094972	0.720204842	1.074	18877.95	391	10	0	0.027155722	133.3736816	FALSE	0.251775281	0.38600599	1.289017397	1.284673704	0.55429761	0.658228412	0.80660261	0.998413738	0.757550661	1.686094507	0.914930076	1.06801877	0.205001123	0.75098215	0.258926483	0.268249531	0.834730671
FM5767	B6.CC027-Ccgss4/m-0152	CROSS	Final	0	FALSE	FALSE		TRUE	XY	0.637383178	0.668691589	1.07	15057.38	342	6	0	0.018732704	91.41404675	FALSE	0.255356442	0.42298184	1.229496437	1.079403965	0.583965979	0.579184272	0.662664909	0.912841167	0.670302357	1.415252476	0.72940957	0.786856468	0.148100095	0.750196713	0.208402734	0.253895364	0.82039483
NZ8891	B6.CC027-Ccmss2/f-0129	CROSS	Final	0	FALSE	FALSE		TRUE	XX	0.835305253	0.027449124	1.0565	16160.4	297	2	0	0.032089831	107.3759056	FALSE	0.213299114	0.436003933	1.275524987	1.102880796	0.467067511	0.587794686	0.752456404	0.958144322	0.5956534	1.506707317	0.654253417	0.858270585	0.176975766	0.750971292	0.212804077	0.339719215	0.764337294
KR4286	B6.CC027-Ccmss2/m-0126	CROSS	Final	0	FALSE	FALSE		TRUE	XY	0.613551402	0.695327103	1.07	16564.57	199	10	0	0.012882715	62.3599622	FALSE	0.250293304	0.425184694	1.342926809	1.125414321	0.470824283	0.755830238	0.775329692	1.239815144	0.777865225	1.834156094	0.846928308	1.060939346	0.202299291	0.845539802	0.24467891	0.322193768	0.892628267
SP7126	B6.CC027-Ccmss2/m-0127	CROSS	Final	0	FALSE	FALSE		TRUE	XY	0.617399439	0.656688494	1.069	17503.39	254	5	0	0.020258072	85.94164271	FALSE	0.208988058	0.417576194	1.232332536	1.14943432	0.521441773	0.542523401	0.735971615	0.902453627	0.58640061	1.616715164	0.854977116	0.912737348	0.153798757	0.840065721	0.23532581	0.26194922	0.811956884
DL6682	B6.CC027-Ccmss2/m-0128	CROSS	Final	0	FALSE	FALSE		TRUE	XY	0.630028064	0.702993452	1.069	16261.83	226	7	0	0.022948605	81.34992755	FALSE	0.22832607	0.428242055	1.167273216	1.257361472	0.436851171	0.600916335	0.809133968	0.992446657	0.675754155	1.566059794	0.79966394	0.851933576	0.158469238	0.615613327	0.180729954	0.287913455	0.781154339
FD2363	B6.CC027-Ccmss2/m-0204	CROSS	Final	0	FALSE	FALSE		TRUE	XY	0.601679104	0.658115672	1.072	16135.98	164	13	0	0.012290797	75.91952187	FALSE	0.26902605	0.369918566	1.22583167	1.035325777	0.485188885	0.650037835	0.707053262	1.039477987	0.660511321	1.682512841	0.861738593	1.01747747	0.196207435	0.689452847	0.25582574	0.285139106	0.823686993
XD4570	B6.CC027-Ccmss2/m-0205	CROSS	Final	0	FALSE	FALSE		TRUE	XY	0.619473189	0.723424271	1.063	14556.07	236	5	0	0.025686361	88.85390696	FALSE	0.226709548	0.391589219	1.116097974	1.156974392	0.46612857	0.574536954	0.699364605	0.82728375	0.538400826	1.508030692	0.729249045	0.746561411	0.169963461	0.708707786	0.210015481	0.281257239	0.836077332
VG9725	B6.CC027-Ccmss2/m-0206	CROSS	Final	0	FALSE	FALSE		TRUE	XY	0.608184384	0.675446849	1.063	13287.46	120	8	0	0.013735998	53.60303611	FALSE	0.229690323	0.355146997	1.076278281	0.937425514	0.462089969	0.468110685	0.708337262	0.821075173	0.644818706	1.320418324	0.57701039	0.888281418	0.158946908	0.652720896	0.18182563	0.307207045	0.753191598
KX6863	B6.CC027-Ccmss3/Ccgss3/f-0115	CROSS	Final	0	FALSE	FALSE		TRUE	XX	0.837748344	0.02743614	1.057	15880.71	237	5	0	0.027799253	102.4787583	FALSE	0.239472986	0.450672669	1.258760185	1.061035974	0.549219927	0.647200459	0.703935973	1.027221356	0.692223648	1.663276214	0.813943679	0.877416929	0.166491342	0.783781292	0.228705202	0.326496826	0.79026715
ED8781	B6.CC027-Ccmss3/Ccgss3/f-0116	CROSS	Final	0	FALSE	FALSE		TRUE	XX	0.866415804	0.027281279	1.063	17545.82	235	3	0	0.029677136	126.5387491	FALSE	0.258181155	0.47777762	1.436182542	1.304641239	0.574153852	0.729062545	0.770154954	1.132463475	0.841396995	1.846023752	0.955156285	1.039905816	0.157416413	0.702902468	0.223700007	0.367095986	0.858780053
TI1836	B6.CC027-Ccmss3/Ccgss3/f-0117	CROSS	Final	0	FALSE	FALSE		TRUE	XX	0.861742424	0.029356061	1.056	17261.5	134	3	0	0.026961344	112.4785078	FALSE	0.320366105	0.527242662	1.461634145	1.353937836	0.580772188	0.705674416	0.887640047	1.131245737	0.746864344	2.074616741	0.866089198	1.076557563	0.216435401	0.885844142	0.254670777	0.405932242	1.079975574
NZ4628	B6.CC027-Ccmss3/Ccgss3/f-0118	CROSS	Final	0	FALSE	FALSE		TRUE	XX	0.876893939	0.028409091	1.056	16447.09	233	2	0	0.031773556	129.738153	FALSE	0.239191217	0.425485546	1.233652719	1.19917854	0.6251561	0.543925935	0.749311785	1.086575049	0.654218988	1.594567581	0.737455586	0.955974456	0.174255727	0.716175228	0.243933697	0.280779116	0.818564148
RK5158	B6.CC027-Ccmss3/Ccgss3/f-0119	CROSS	Final	0	FALSE	FALSE		TRUE	XX	0.84557082	0.029843676	1.0555	15933	179	3	0	0.026034483	93.25094859	FALSE	0.202410048	0.399234206	1.142283059	1.238561203	0.450699706	0.60716738	0.655243689	0.976338202	0.673695954	1.574530501	0.823699059	0.901148361	0.124709694	0.739534137	0.200087824	0.282244336	0.733634433
BZ2560	B6.CC027-Ccmss3/Ccgss3/f-0178	CROSS	Final	0	FALSE	FALSE		TRUE	XX	0.859095193	0.027803959	1.061	18254.31	157	13	0	0.023525148	107.113654	FALSE	0.243230245	0.389880553	1.195936819	1.189143902	0.505524482	0.667184944	0.76924304	0.919728059	0.699999115	1.733453748	0.770996051	1.03301638	0.20061017	0.79789381	0.208717845	0.29313627	0.835309634
BF5043	B6.CC027-Ccmss3/Ccgss3/f-0179	CROSS	Final	0	FALSE	FALSE		TRUE	XX	0.853358562	0.027909177	1.057	14856.85	170	5	0	0.022521414	79.3909121	FALSE	0.26129366	0.429902784	1.137589941	1.076607959	0.450970511	0.559741906	0.753726535	0.944278403	0.699408146	1.55746368	0.756418896	0.803602527	0.127281379	0.767457577	0.191628813	0.255639702	0.817804733
HM3147	B6.CC027-Ccmss3/Ccgss3/f-0180	CROSS	Final	0	FALSE	FALSE		TRUE	XX	0.874172185	0.025543992	1.057	14795.43	94	2	0	0.034321327	121.877106	FALSE	0.219662365	0.411613477	1.132038444	1.220917216	0.488596687	0.524959257	0.764627794	1.003012151	0.524486138	1.38759026	0.65060613	0.870606436	0.164510214	0.749014869	0.195127768	0.308473548	0.767128565
KI7464	B6.CC027-Ccmss3/Ccgss3/f-0198	CROSS	Final	0	FALSE	FALSE		TRUE	XX	0.840113529	0.030747398	1.057	14348.3	274	5	0	0.030306391	130.9662865	FALSE	0.205808344	0.375445157	1.1703825	1.070788824	0.454757685	0.564596477	0.679592673	0.980255455	0.632897248	1.355491529	0.780580242	0.696667866	0.142177115	0.578326326	0.205738649	0.268324458	0.725730541
MJ2934	B6.CC027-Ccmss3/Ccgss3/f-0199	CROSS	Final	0	FALSE	FALSE		TRUE	XX	0.863078376	0.033050047	1.059	13726.01	214	8	0	0.023188008	65.56761929	FALSE	0.19816389	0.360629138	1.096458288	1.015954207	0.457379743	0.547719163	0.690222313	0.81116057	0.620282117	1.441860862	0.630481729	0.806716453	0.132303538	0.674267206	0.159769636	0.251711853	0.674194352
UQ4392	B6.CC027-Ccmss3/Ccgss3/f-0200	CROSS	Final	0	FALSE	FALSE		TRUE	XX	0.875354108	0.03068933	1.059	15415.4	229	9	0	0.022674061	102.2081599	FALSE	0.209595564	0.364375823	1.126276132	1.134190294	0.401935659	0.582988342	0.689505184	0.831116795	0.734071	1.415791762	0.703841495	0.920248428	0.222634471	0.656616001	0.182025736	0.224515706	0.805168722
UX6904	B6.CC027-Ccmss3/Ccgss3/m-0111	CROSS	Final	0	FALSE	FALSE		TRUE	XY	0.635895033	0.670103093	1.067	15817.47	234	2	0	0.025219635	108.0390851	FALSE	0.229682716	0.470113041	1.200634315	1.094675539	0.454813504	0.677668328	0.743987395	0.942754932	0.720405877	1.56630589	0.717624144	0.987894887	0.158179509	0.711744569	0.223044488	0.355176851	0.743797731
YL3627	B6.CC027-Ccmss3/Ccgss3/m-0112	CROSS	Final	0	FALSE	FALSE		TRUE	XY	0.599719101	0.674625468	1.068	16084.58	272	4	0	0.021533055	73.16571506	FALSE	0.211320345	0.447757907	1.2229722	1.115913172	0.4872367	0.714535077	0.749910562	1.001642271	0.674061542	1.594694572	0.863621922	0.961168736	0.172525436	0.718265356	0.199880821	0.291707873	0.760044489
LG8203	B6.CC027-Ccmss3/Ccgss3/m-0113	CROSS	Final	0	FALSE	FALSE		TRUE	XY	0.619270346	0.694574369	1.069	17397.37	346	5	0	0.01673512	67.45389028	FALSE	0.232621375	0.423339863	1.194146049	1.125055144	0.491913448	0.59072149	0.773967584	0.870936267	0.706371158	1.653468364	0.818227149	0.959627836	0.170887904	0.792016289	0.195259405	0.288147011	0.722235625
CY8217	B6.CC027-Ccmss3/Ccgss3/m-0114	CROSS	Final	0	FALSE	FALSE		TRUE	XY	0.641986879	0.707591378	1.067	17954.53	150	7	0	0.030311882	143.4412682	FALSE	0.230916716	0.514410707	1.326963522	1.342224299	0.53106389	0.643291865	0.846081967	1.131803808	0.836112335	1.96006297	0.721322332	1.054887266	0.163078665	0.901109877	0.220779996	0.312678834	0.954633988
SI9194	B6.CC027-Ccmss3/Ccgss3/m-0175	CROSS	Final	0	FALSE	FALSE		TRUE	XY	0.608108108	0.682665424	1.073	14333.71	340	5	0	0.010670986	48.99057581	FALSE	0.186762585	0.397664078	1.23164239	1.084646213	0.50517291	0.581845334	0.731353075	1.080599806	0.544241661	1.397963647	0.755910575	0.889162924	0.162972506	0.71642323	0.189343913	0.279829932	0.72695784
TT5873	B6.CC027-Ccmss3/Ccgss3/m-0176	CROSS	Final	0	FALSE	FALSE		TRUE	XY	0.600187266	0.68071161	1.068	13746.35	180	3	0	0.015465627	55.99585335	FALSE	0.200998742	0.415310104	1.131572722	1.111494672	0.502678721	0.631076398	0.745652228	1.096290641	0.599868124	1.493996078	0.648753812	0.909477478	0.160842642	0.674433347	0.193505846	0.313028443	0.777005995
HV8919	B6.CC027-Ccmss3/Ccgss3/m-0177	CROSS	Final	0	FALSE	FALSE		TRUE	XY	0.609506058	0.691985089	1.073	15103.66	268	8	0	0.012479684	51.30768825	FALSE	0.158703249	0.443005189	1.154157293	1.17229859	0.504513456	0.515901424	0.669307944	1.077023674	0.643287761	1.528636047	0.857143203	0.824237273	0.180750884	0.649643836	0.212729887	0.256361693	0.787888469
GH0691	B6.CC027-Ccmss3/Ccgss3/m-0193	CROSS	Final	0	FALSE	FALSE		TRUE	XY	0.61281337	0.688950789	1.077	18010.83	377	9	0	0.017521414	70.12981172	FALSE	0.221977567	0.437181432	1.139259055	1.253523645	0.446120498	0.585869757	0.788470093	1.097784007	0.716291294	1.648341674	0.883135364	1.004173657	0.169231522	0.82450397	0.245130305	0.284384467	0.831999461
XL0304	B6.CC027-Ccmss3/Ccgss3/m-0194	CROSS	Final	0	FALSE	FALSE		TRUE	XY	0.621141254	0.677736202	1.069	14271.7	325	8	0	0.009747419	50.55469734	FALSE	0.263318283	0.378861617	1.201398425	0.96190351	0.450822201	0.546115673	0.770335605	0.968209695	0.58703581	1.4282109	0.692839591	0.7441299	0.164381238	0.716452753	0.21223818	0.24748275	0.744199969
WJ3900	B6.CC027-Ccmss3/Ccgss3/m-0195	CROSS	Final	0	FALSE	FALSE		TRUE	XY	0.634020619	0.693533271	1.067	14962.51	244	5	0	0.015873051	61.42375972	FALSE	0.222021578	0.369055735	1.196323373	1.260483733	0.5172929	0.595020502	0.697008741	0.975437968	0.753616891	1.458645677	0.698211747	0.844510734	0.146232153	0.648220134	0.19555543	0.258846951	0.713717168
DD0911	B6.CC027-Ccmss3/Ccgss3/m-0196	CROSS	Final	0	FALSE	FALSE		TRUE	XY	0.606542056	0.669626168	1.07	15841.91	309	5	0	0.013622886	62.6568043	FALSE	0.227308503	0.364728833	1.08282423	1.09437587	0.471218542	0.576256406	0.662167784	0.986371192	0.6933509	1.602963653	0.763544473	0.82022957	0.200228428	0.706291262	0.204647088	0.233494627	0.749152266
AH7719	B6.CC027-Ccmss3/Ccgss3/m-0197	CROSS	Final	0	FALSE	FALSE		TRUE	XY	0.630819367	0.712756052	1.074	17190.89	325	10	0	0.023275862	122.0472162	FALSE	0.247980123	0.392533397	1.212269708	1.215061884	0.55279266	0.568905842	0.739868446	0.970862833	0.825786026	1.698980872	0.731957281	1.021529191	0.190856858	0.862666016	0.221803474	0.247514761	0.735389331
NF1995	B6.CC027-Ccmss4/f-0132	CROSS	Final	0	FALSE	FALSE		TRUE	XX	0.855996223	0.03210576	1.059	16943.9	270	7	0	0.030899407	110.7736549	FALSE	0.219784079	0.44051245	1.266473294	1.366450262	0.422747947	0.610603136	0.820295089	1.105884551	0.731413558	1.718907437	0.797218941	0.84496473	0.173985893	0.742568013	0.195468547	0.276795738	0.858125807
QK3603	B6.CC027-Ccmss4/f-0133	CROSS	Final	0	FALSE	FALSE		TRUE	XX	0.842278719	0.02259887	1.062	15929.37	354	7	0	0.02440369	80.7488834	FALSE	0.230894284	0.443645977	1.271927428	1.243866051	0.570016339	0.586338393	0.78063361	0.96544948	0.659410972	1.634214244	0.811080518	0.947244112	0.135347492	0.77341424	0.247090783	0.305285182	0.779503621
XX5184	B6.CC027-Ccmss4/f-0134	CROSS	Final	0	FALSE	FALSE		TRUE	XX	0.856534091	0.028882576	1.056	17392.28	155	2	0	0.038649242	195.4429216	FALSE	0.171110404	0.443932604	1.264871564	1.398954045	0.433065713	0.619182775	0.677886983	1.183513627	0.770514289	1.776592866	0.74998794	0.979400074	0.148226687	0.7043355	0.156506223	0.240624005	0.689731319
CR8717	B6.CC027-Ccmss4/f-0135	CROSS	Final	0	FALSE	FALSE		TRUE	XX	0.850047304	0.027909177	1.057	17799.29	102	17	0	0.021269493	104.4327799	FALSE	0.188153522	0.398498935	1.081222615	1.124538938	0.436028512	0.497884895	0.710983226	0.987960493	0.696993908	1.663661422	0.683116954	1.006950009	0.16421999	0.709466312	0.206131763	0.231863119	0.793739314
UE6959	B6.CC027-Ccmss4/m-0130	CROSS	Final	0	FALSE	FALSE		TRUE	XY	0.627570093	0.674766355	1.07	17170.54	288	12	0	0.029767186	192.6056707	FALSE	0.255786922	0.381525529	1.157738665	1.033980193	0.526191903	0.608891682	0.772544061	0.878190117	0.802129616	1.658305285	0.768292594	1.027573872	0.197372923	0.820474989	0.25025419	0.286944937	0.922044295
JF1485	B6.CC027-Ccmss4/m-0131	CROSS	Final	0	FALSE	FALSE		TRUE	XY	0.615277778	0.719907407	1.08	19096.06	446	22	0	0.030540303	124.4938236	FALSE	0.200983907	0.372485288	1.303619957	1.193125938	0.447265126	0.573469195	0.778642449	1.110124506	0.83750277	1.722868827	0.83106165	1.138245496	0.217374726	0.772567897	0.236279153	0.245967018	0.781208424
TH5789	B6.Cg-Cd1d1tm1.1Fdba/Mmmh_M_370SR	UNCLASSIFIED	Final	0	FALSE	FALSE		TRUE	XY	0.665881244	0.697926484	1.061	10433.42	25	2	0	0.025841204	85.797431	FALSE	0.162650361	0.330763934	1.138169146	0.900950734	0.480762647	0.521209584	0.650984828	0.867117159	0.666991081	1.477846741	0.618972324	0.788715276	0.139839055	0.550634252	0.165813273	0.277186119	0.650313908
MU7901	B6.Cg-Cd1d1tm1.1Fdba/Mmmh_M_371SR	UNCLASSIFIED	Final	0	FALSE	FALSE		TRUE	XY	0.668406072	0.726280835	1.054	8165.2	19	4	0	0.020416209	76.58022816	FALSE	0.229265739	0.413829558	1.224955086	0.891711456	0.459388775	0.572184579	0.745726007	0.652892978	0.554426282	1.347915985	0.567653152	0.78834592	0.176603203	0.614804493	0.162763978	0.309606725	0.740704695
IA5692	B6.Cg-Cdkn2atm3.1Nesh Tyrc-2J/Mmnc_F_35406	UNCLASSIFIED	Final	0	FALSE	FALSE		TRUE	XX	0.888784166	0.035815269	1.061	10398.94	378	3	4	0.020568856	109.3402236	FALSE	0.27425874	0.510340509	1.189159739	1.073571028	0.489953815	18.14896633	1.056742388	0.80383198	0.734113331	1.649495149	0.73276704	1.053184333	0.137514025	0.738633023	0.31926333	0.367729811	0.980773102
ZI7740	B6.Cg-Cdkn2atm3.1Nesh Tyrc-2J/Mmnc_M_35405	UNCLASSIFIED	Final	0	FALSE	FALSE		TRUE	XY	0.65917603	0.685861423	1.068	10958.84	299	5	0	0.017787173	97.35663514	FALSE	0.322935724	0.428695121	1.052027681	0.951560817	0.419205063	18.45168405	0.998189852	0.753273355	0.742049536	1.691694092	0.608002467	1.021641245	0.18487363	0.71485687	0.295834308	0.356424679	0.89963925
EY2768	B6.C-Tg(CMV-cre)1Cgn/J_M_DWT	CELL LINE	Final	0	FALSE	TRUE	B6.C-Tg(CMV-cre)1Cgn/J_M_DWT	TRUE	XY	0.598848369	0.704894434	1.042	9575.54	9	48	1	0.047279816	270.3620944	FALSE	0.379404116	0.523103555	32.79292223	0.862614368	0.471200488	22.17211336	1.090382156	0.650302623	0.769460371	1.585288874	0.512869148	1.116281474	0.158842186	0.709307117	0.294187006	0.448016421	0.881412259
ZY5522	B6.C-Tg(CMV-cre)1Cgn/J_M_DWT	CELL LINE	Final	0	FALSE	TRUE	B6.C-Tg(CMV-cre)1Cgn/J_M_DWT	TRUE	XY	0.680094787	0.751658768	1.055	10169.68	3	10	1	0.019946189	78.45126479	FALSE	0.295092982	0.447506885	30.19162084	1.107311587	0.597167504	20.68413991	1.195613319	0.885868936	0.679471012	1.711165636	0.667671226	0.894423781	0.178766758	0.751843033	0.372381581	0.485364532	0.957945962
GM3709	B6;129-Gata2tm1Sac/Mmmh_M_598AC	UNCLASSIFIED	Final	0	FALSE	FALSE		TRUE	XY	0.575958353	0.651206815	1.0565	7014.8	131	13	0	0.068352734	700.2364829	FALSE	0.191594849	0.399583602	1.221844829	1.040941657	0.411130613	0.528311391	0.768802842	1.094257485	0.851485143	1.46133839	0.558675754	0.72817447	0.177196724	0.689114211	0.192165072	0.272423926	1.761275564
YY3787	B6;129S4-Cdkn2atm2.1Nesh/Mmnc_F_36271	UNCLASSIFIED	Final	0	FALSE	FALSE		TRUE	XX	0.885334646	0.066437008	1.016	1564.9	155	59	37	0.08155392	962.3190572	FALSE	0.453063227	0.607705401	1.463349493	1.121475266	0.487570158	0.855644092	1.403920889	0.89781923	0.818581092	1.906188444	0.565530262	1.056934524	0.201290432	0.784713178	0.343791278	0.618568694	1.196879301
DD0873	B6;129S4-Cdkn2atm2.1Nesh/Mmnc_M_36270	UNCLASSIFIED	Final	0	FALSE	FALSE		TRUE	XY	0.632183908	0.653256705	1.044	4349.11	132	19	1	0.040662201	213.6013756	FALSE	0.272699172	0.43916983	0.992385857	0.849138316	0.458024242	0.636681288	0.981349128	0.742449938	0.622195581	1.248300004	0.385365778	0.801312491	0.155433929	0.632082651	0.304429767	0.477338517	0.92685528
FT1970	B6;129S6-Tg(APPswe,PSEN1dE9)85Dbo/Mmjax Gt(ROSA)26Sortm32(CAG-COP4*H134R/EYFP)Hze/J Tg(Arc-cre/ERT2)MRhn/CdnyJ/Mmucd_M_2L	UNCLASSIFIED	Final	0	FALSE	FALSE		TRUE	XY	0.568128241	0.671381424	1.0605	7459.23	26	9	0	0.070563365	958.0544015	FALSE	0.251902833	0.429133033	30.30824107	1.092472693	0.510374714	0.639610654	0.764690666	1.621884236	0.752759132	1.610891137	0.750211951	0.835877683	0.159936179	0.65904967	0.182056438	0.347221042	0.872342596
PN9205	B6;FVB-Apoc2em1Arem/Mmnc_M_31714	UNCLASSIFIED	Final	0	FALSE	FALSE		TRUE	XY	0.66712963	0.7375	1.08	11156.28	758	7	0	0.034243356	119.2335671	FALSE	0.271237449	0.423169861	1.220120344	0.968244193	0.481164121	0.704356866	0.853869116	0.780547161	0.734743349	1.697788675	0.633275803	1.117756442	0.187069583	0.796771212	0.257971375	0.48322574	0.889095922
AK4761	B6;FVB-Apoc2em1Arem/Mmnc_M_31715	UNCLASSIFIED	Final	0	FALSE	FALSE		TRUE	XY	0.645716946	0.701582868	1.074	9832.02	733	11	0	0.020829124	69.13409385	FALSE	0.377338568	0.418327097	1.191006639	1.021255138	0.491150389	0.623269742	0.957178777	0.911715074	0.755694221	1.798918397	0.605877587	1.002540772	0.147375629	0.740132819	0.258136196	0.374185604	0.895034878
XC6829	B6;FVB-Ppp1r12aem1Sfsh Tg(Myh11-cre/ERT2)1Soff/JMmmh_M_356SR	UNCLASSIFIED	Final	0	FALSE	FALSE		TRUE	XY	0.673604541	0.709082308	1.057	8222.46	55	1	1	0.02286734	87.82761889	FALSE	0.194467339	0.371300054	1.26677411	0.826881449	0.435271173	0.499242293	0.693223159	12.53675841	0.624508934	1.344974547	0.633387055	0.637886925	0.141806702	8.984050528	0.222074647	0.249925192	0.656008021
NA6730	B6J.129-Cdkn2atm2.2Tg(tdTomato/SV40)Nesh/Mmnc_F_36760	UNCLASSIFIED	Final	0	FALSE	FALSE		TRUE	XX	0.911290323	0.047912713	1.054	10556.89	314	2	8	0.035272348	177.1341609	FALSE	0.33333677	0.388750812	1.204521277	0.988738054	0.48252842	0.696606596	0.98087589	0.885582685	0.823253729	1.71110981	0.691965078	1.102597331	1.662231784	0.763292895	6.35622733	0.463583448	0.952932058
WW1510	B6J.129-Cdkn2atm2.2Tg(tdTomato/SV40)Nesh/Mmnc_M_36757	UNCLASSIFIED	Final	0	FALSE	FALSE		TRUE	XY	0.672778561	0.748001881	1.0635	11943.22	286	1	0	0.031346365	185.570912	FALSE	0.285517544	0.425010867	1.178911151	1.105229204	0.487138145	0.687251614	0.92043823	0.883764716	0.784545276	1.723236534	0.626547737	1.033807953	2.737702976	0.780191343	7.481983064	0.361711376	0.874135825
GP9270	B6J.129-Pak2tm1.1Cher/Mmucd_M_20	UNCLASSIFIED	Final	0	FALSE	FALSE		TRUE	XY	0.647587512	0.721381268	1.057	8338.56	3	1	0	0.016851526	51.89286615	FALSE	0.225698489	0.421295852	1.160512371	1.000172902	0.453195851	0.518195097	0.780350728	1.07692478	0.772795465	1.419070258	0.615933816	0.747371406	0.151704883	0.603941335	0.186483077	0.277506007	0.784548097
WF3822	B6J.129-Pak2tm1.1Cher/Mmucd_M_5	UNCLASSIFIED	Final	0	FALSE	FALSE		TRUE	XY	0.636882129	0.700095057	1.052	5297.18	5	8	0	0.028371403	68.44451117	FALSE	0.273541888	0.413616477	1.212154907	1.026206833	0.59239092	0.61768741	0.921056501	0.956547098	0.744358636	1.658996624	0.550481811	0.796273073	0.178396883	0.705281223	0.227290844	0.448540735	0.828743193
KB8289	B6J.129S2-Polntm1.2Rwd/Mmucd_M_NEP	UNCLASSIFIED	Final	0	FALSE	FALSE		TRUE	XY	0.634815516	0.695364238	1.057	9917.07	22	3	0	0.019539864	78.91973179	FALSE	0.260258212	0.355750086	29.34101266	0.912668374	0.41705849	0.538465266	0.648376715	0.855897598	0.610966488	1.297862628	0.729348177	0.839662971	0.147321677	0.610462307	0.20893259	0.268022599	0.646158319
KE8084	B6J.129S7-Bbs4Gt1Nk/Mmmh_M_9031A.2	UNCLASSIFIED	Final	0	FALSE	FALSE		TRUE	XY	0.643867925	0.75990566	1.06	7209.67	185	4	0	0.01665056	59.73378132	FALSE	0.258402986	0.360765521	1.176336943	0.980904947	0.384761075	0.518331701	0.77479285	0.796014351	0.990336726	1.468860774	0.639002982	0.777566902	0.162420771	0.660779294	0.207221718	0.325535055	0.989365807
GV8486	B6J.129S7-Rgs12tm1Dski/Mmucd_M_479	UNCLASSIFIED	Final	0	FALSE	FALSE		TRUE	XY	0.644507308	0.715700141	1.0605	9299.2	62	2	0	0.015564463	44.65757216	FALSE	0.168401535	0.375300994	1.066327982	0.991590392	5.38906419	0.495526356	0.671240345	0.903840933	0.667153974	1.351298651	0.716190436	0.702748423	1.392484978	0.524023423	0.160658936	0.299918187	0.750817061
IJ2007	B6J.129S-Sprr3tm1.1Ppy/Mmucd_M_1	UNCLASSIFIED	Final	0	FALSE	FALSE		TRUE	XY	0.615819209	0.683145009	1.062	9207.27	4	4	0	0.023082583	99.29862203	FALSE	0.143473596	0.357109148	1.185476384	0.898637802	0.461591813	0.520784174	0.628199304	1.092289143	0.619401907	1.433324035	0.702053994	0.661433915	0.116212527	0.629176793	0.132721222	0.296722078	0.588556713
DI4491	B6J.129S-Sprr3tm1.1Ppy/Mmucd_M_648	UNCLASSIFIED	Final	0	FALSE	FALSE		TRUE	XY	0.642722117	0.698960302	1.058	6259.9	15	2	0	0.022502745	60.22712719	FALSE	0.250004071	0.367418123	1.151775942	1.126216421	0.447291628	0.582437599	0.829086982	0.934679756	0.701928362	1.534529778	0.645218173	0.73994815	0.164379673	0.638828293	0.198565533	0.386907258	0.777169204
IM0269	B6J.B6N-Tmem35atm1(KOMP)Vlcg/TranMmnc_F_34941	UNCLASSIFIED	Final	0	FALSE	FALSE		TRUE	XX	0.922488038	0.03923445	1.045	6153.37	785	12	47	0.03214474	117.8146155	FALSE	0.245881591	0.432446077	0.943710773	0.823776461	0.429033312	0.58163266	0.949561227	0.635261824	0.652488162	1.217056997	0.498263687	0.733906983	0.103520538	0.59219598	0.211103891	0.459585684	0.839702698
MM1024	B6J.B6N-Tmem35atm1(KOMP)Vlcg/TranMmnc_M_34942	UNCLASSIFIED	Final	0	FALSE	FALSE		TRUE	XY	0.615900383	0.699712644	1.044	2953.4	745	24	0	0.047059082	301.9057875	FALSE	0.397846485	0.355522391	1.11803327	0.893207682	0.444233692	0.588135612	0.945689559	0.736439238	0.693776551	1.415317708	0.558000857	0.808898087	0.153043924	0.573237531	0.253267379	0.437461837	0.794338599
MV8000	B6J.Cg-Hprttm1Rerf/Mmmh_M_8450	UNCLASSIFIED	Final	0	FALSE	FALSE		TRUE	XY	0.61121673	0.684885932	1.052	5789.83	2	11	0	0.038037558	208.6913845	FALSE	0.198796863	0.396557427	1.618873153	0.976539935	0.479461418	0.603126539	0.72938241	15.69424376	0.808659352	1.436138938	5.026745359	5.04729864	2.183138446	0.638533452	0.217277545	0.336970183	0.89432681
LL8892	B6J.Cg-Selltm1.1Rpmc/Mmmh_M_322SR	UNCLASSIFIED	Final	0	FALSE	FALSE		TRUE	XY	0.640831758	0.680529301	1.058	8035.86	7	1	0	0.017840984	62.34389526	FALSE	0.225738247	0.358642573	1.241560358	0.953725427	0.403068458	0.536470553	0.756982225	0.798794822	0.688165659	1.361771575	0.633162183	0.706956439	0.12979327	0.610015924	0.183303439	0.322927647	0.722138394
TI3900	B6J.Cg-Sptlc1tm1.1Rlp/Mmucd_M_160	UNCLASSIFIED	Final	0	FALSE	FALSE		TRUE	XY	0.587017874	0.694731891	1.063	7254.8	6	11	0	0.054735339	624.8140946	FALSE	0.266719785	0.458868302	1.37522651	1.260819574	0.596294466	0.668798139	0.976594149	1.161437163	0.722555615	1.665103362	0.812702767	0.934415206	0.133290973	0.753983062	0.17795103	0.307796011	0.704774296
LJ6889	B6J.Cg-Sptlc1tm1.1Rlp/Mmucd_M_859	UNCLASSIFIED	Final	0	FALSE	FALSE		TRUE	XY	0.627589454	0.667137476	1.062	8948.67	5	4	0	0.019589282	76.51317792	FALSE	0.233665937	0.422073766	1.151902669	0.967517783	0.413022145	0.553936897	0.673284205	1.071779055	0.622885669	1.520113699	0.699880328	0.784250382	0.134992086	0.620203707	0.186284609	0.31602452	0.702674038
BL5233	B6J.Cg-Tg(Eif2s3x)6Mjmm/Mmucd_M_3	UNCLASSIFIED	Final	0	FALSE	FALSE		TRUE	XY	0.554981203	0.692669173	1.064	8380.86	49	9	0	0.067344608	872.0630803	FALSE	0.221218382	0.391725969	1.115398831	1.058364102	0.456874425	0.461885844	0.679047362	1.289963282	14.07755507	1.451044627	0.626427456	0.800037351	0.128745757	0.676064375	0.15010395	0.305696599	0.666757452
FH4111	B6J.Cg-Tg(Eif2s3x)6Mjmm/Mmucd_M_68603	UNCLASSIFIED	Final	0	FALSE	FALSE		TRUE	XY	0.668401135	0.715231788	1.057	8354.84	47	1	0	0.020600703	65.65314878	FALSE	0.178459433	0.376189134	1.028146568	0.889903345	0.460212288	0.463324257	0.73191109	0.6927721	14.60016003	1.31061757	0.683914958	0.701988315	0.135250946	0.505814598	0.249316566	0.295277949	0.681521136
FP4495	B6J.Cg-Tg(Eif2s3y)10Psb/Mmucd_M_1	UNCLASSIFIED	Final	0	FALSE	FALSE		TRUE	XY	0.445304937	0.61713456	1.033	5757.75	71	141	4	0.14802438	5165.575272	FALSE	0.313664244	0.614128885	2.232990687	1.538622112	0.673874455	0.828275071	1.061004909	23.07794225	11.1644324	2.104815598	1.07437819	1.061178588	0.231861443	1.054752465	0.345621177	0.463028169	1.005601313
JU7790	B6J.Cg-Tg(Eif2s3y)10Psb/Mmucd_M_2	UNCLASSIFIED	Final	0	FALSE	FALSE		TRUE	XY	0.604245283	0.711320755	1.06	8365.86	15	4	0	0.031227762	162.9694874	FALSE	0.20177248	0.398644089	1.305185848	1.028944023	0.453031813	0.486979316	0.757483535	1.02679242	14.99463581	1.6372498	0.669985043	0.716722625	0.155154431	0.684329058	0.192209803	0.315329267	0.789757569
DK7459	B6J.Cg-Tg(Hoxa4-cre)2Jlzn/Mmmh_M_306SR	UNCLASSIFIED	Final	0	FALSE	FALSE		TRUE	XY	0.64028436	0.743127962	1.055	7453.83	22	2	0	0.018535032	52.63987305	FALSE	0.193055231	0.372426214	35.90076011	0.901013853	0.378731701	0.538247108	0.751292075	0.781612076	0.681126761	1.385463081	0.547906577	0.746596499	0.142611335	0.580507287	0.186615585	0.336471522	0.75035296
GQ5395	B6J.Cg-Tg(Hoxa4-cre)2Jlzn/Mmmh_M_308SR	UNCLASSIFIED	Final	0	FALSE	FALSE		TRUE	XY	0.676275992	0.72731569	1.058	10350.59	20	2	0	0.028985284	129.1041836	FALSE	0.162599407	0.34587396	36.00345041	0.842463948	0.366355882	0.409831659	0.656870686	0.770970448	0.653489237	1.190270166	0.585570412	0.602670884	0.117577824	0.593202826	0.152744897	0.294379318	0.561417202
JG1986	B6J.Cg-Tg(Kdm5d)Mjmm/Mmucd_M_2	UNCLASSIFIED	Final	0	FALSE	FALSE		TRUE	XY	0.633144476	0.797450425	1.059	7035.07	48	5	0	0.035736877	189.4584997	FALSE	0.256429632	0.420607141	1.188048152	0.965306892	0.433968774	0.58563752	0.830837695	0.819608237	24.00573679	1.47006389	0.649176347	0.765166691	0.156785967	0.658842209	0.19644443	0.32025275	0.749530738
MB9328	B6J.Cg-Tg(Kdm5d)Mjmm/Mmucd_M_20083	UNCLASSIFIED	Final	0	FALSE	FALSE		TRUE	XY	0.515151515	0.744318182	1.056	5948.51	64	22	0	0.084273007	1457.926385	FALSE	0.245439517	0.397914615	1.308562467	1.19676981	0.61662476	0.560308158	0.714296239	1.089684213	24.25598057	1.483396096	0.907621886	0.779186413	0.170462788	0.626543206	0.179372579	0.289988471	0.724382794
PN8221	B6J.Cg-Tg(Uty)1Psb/Mmucd _M_0071	UNCLASSIFIED	Final	0	FALSE	FALSE		TRUE	XY	0.661931818	0.785037879	1.056	8176.69	18	2	0	0.032155722	136.6628624	FALSE	0.211821607	0.397715858	1.185075851	1.076352174	0.430125053	0.631306661	0.887889647	0.841171486	19.31588028	1.484708032	0.585933788	0.75152643	0.16045609	0.621155856	0.197634941	0.357601836	0.752504821
NI9654	B6J.CJ-Fechm1Pas/Mmmh_M_310SR	UNCLASSIFIED	Final	0	FALSE	FALSE		TRUE	XY	0.610640301	0.678907721	1.062	7167.56	29	6	0	0.028382385	109.3676922	FALSE	0.205090842	0.387161284	1.22147641	1.118651954	0.488869599	0.588345633	0.72228251	0.981366655	0.791622747	1.472608053	0.682240964	0.712376762	0.182209959	0.65601166	0.187790662	0.265501954	1.893114038
AM2762	B6J;129S7-Gt(ROSA)26Sorem2Rray/Mmucd_M_X415	UNCLASSIFIED	Final	0	FALSE	FALSE		TRUE	XY	0.633208255	0.696060038	1.066	8562.31	454	5	0	0.026158577	137.4696074	FALSE	0.196092	0.370811257	1.175734463	0.942386151	0.439367542	0.524391352	0.655080421	14.52143597	0.587575254	39.01588448	8.165322265	10.11362884	0.147623757	0.713242313	2.307321948	0.278663199	0.661387133
UE3131	B6J;129S7-Gt(ROSA)26Sorem2Rray/Mmucd_M_X416	UNCLASSIFIED	Final	0	FALSE	FALSE		TRUE	XY	0.463485881	0.595423564	1.027	4807.37	646	227	9	0.162950802	6400.063773	FALSE	0.34863107	0.577238197	1.746483569	1.525780964	0.686445424	0.866793358	1.103513022	17.53514434	1.125354467	42.38904498	8.652956586	7.108454383	0.204269517	0.904859877	1.179230032	0.534387362	1.235809776
CS5838	B6J;129S7-Gt(ROSA)26Sortm1(CAG-mCherry/CHRM3*)Rray/Mmucd_M_X918	UNCLASSIFIED	Final	0	FALSE	FALSE		TRUE	XY	0.668406072	0.744781784	1.054	6907.93	92	4	0	0.01823523	75.35151517	FALSE	0.285903389	0.378840086	1.222508417	0.968307733	0.356112576	0.604088529	0.941237386	10.73230658	0.594100005	1.454271114	7.32390389	8.434367131	0.171397272	0.681246254	3.048526318	0.377681997	0.79691046
EZ3462	B6J;129S7-Gt(ROSA)26Sortm3Rray/Mmucd_M_487	UNCLASSIFIED	Final	0	FALSE	FALSE		TRUE	XY	0.576097106	0.68767507	1.071	8316.58	508	6	0	0.053161652	439.3214507	FALSE	0.185292587	0.41880213	0.989469631	0.893276205	0.445856531	0.571388952	0.714837399	14.1134995	0.654355782	33.61202725	9.294329087	12.6245455	0.155592867	0.65014732	3.164282757	0.310464283	0.709907486
MB8057	B6J;129S7-Gt(ROSA)26Sortm3Rray/Mmucd_M_6	UNCLASSIFIED	Final	0	FALSE	FALSE		TRUE	XY	0.597918638	0.684011353	1.057	6911.4	407	6	0	0.041545135	348.0636534	FALSE	0.232803612	0.426251983	1.096882648	1.000664872	0.465607224	0.590762677	0.677575708	14.76631784	0.720114093	35.11717328	11.07604058	13.31654022	0.132679249	0.589315793	3.282400707	0.266805382	0.774806303
DH2273	B6J;129S7-Gt(ROSA)26Sortm4Rray/Mmucd_M_30383	UNCLASSIFIED	Final	0	FALSE	FALSE		TRUE	XY	0.614877589	0.671374765	1.062	6615.33	101	6	0	0.036972326	260.3058789	FALSE	0.284037113	0.524236672	1.16003236	0.936460838	0.485236366	0.653784201	0.905169895	14.19565792	0.65605166	1.586768267	10.04424162	12.73949533	0.163861751	0.784087549	2.97913966	0.372619203	0.811448229
YL4500	B6J;B6N-Sema3gtm1(KOMP)Vlcg/MukoMmucd_M_311	UNCLASSIFIED	Final	0	FALSE	FALSE		TRUE	XY	0.563294118	0.670117647	1.0625	9097.03	58	7	0	0.042320448	354.6699406	FALSE	0.171154685	0.373638263	1.111900863	1.070129006	0.441242715	0.490159757	0.622950291	0.875889874	0.563040654	1.332851998	0.837195944	0.848628241	0.124326236	0.618883031	0.204462245	0.229635284	0.675055185
AG3795	B6J;B6N-Sema3gtm1(KOMP)Vlcg/MukoMmucd_M_4	UNCLASSIFIED	Final	0	FALSE	FALSE		TRUE	XY	0.620169651	0.745051838	1.061	8410.61	75	3	0	0.020593016	72.07570422	FALSE	0.224953939	0.358356857	1.063299724	0.980903805	0.446697648	0.484031441	0.686394868	0.956173139	0.735618405	1.37219525	0.695074381	0.745486891	0.162176096	0.550138413	0.172044582	0.267638117	0.702564919
EU5983	B6J-Nrastm1Nesh Tg(Tyr-cre/ERT2)13Bos/Mmnc_F_35834	UNCLASSIFIED	Final	0	FALSE	FALSE		TRUE	XX	0.898843931	0.035163776	1.038	6229.47	52	7	0	0.038797496	102.9810557	FALSE	0.3043596	0.426841866	31.52481613	1.018224127	0.437757716	0.57934272	0.877762814	0.786743882	0.580305883	1.28726774	0.416407597	0.775506977	0.131471789	0.66811427	0.233888153	0.357494109	0.719964561
EU3955	B6J-Nrastm1Nesh Tg(Tyr-cre/ERT2)13Bos/Mmnc_M_35836	UNCLASSIFIED	Final	0	FALSE	FALSE		TRUE	XY	0.616777884	0.685891325	1.049	7767.74	36	8	0	0.038677795	188.4079922	FALSE	0.248978451	0.378488442	30.99743094	0.666345637	0.360465182	0.48328082	0.707412921	0.561038309	0.482379657	0.992695365	0.416980974	0.640469387	0.165170296	0.492421187	0.216150372	0.33098428	0.5425001
RB9718	B6J-Tg(Fcer1g-cre)NIDA168Htz/Mmucd_M_5032	UNCLASSIFIED	Final	0	FALSE	FALSE		TRUE	XY	0.555032926	0.682972719	1.063	6794.45	57	13	0	0.068073797	868.4510484	FALSE	0.245052818	0.412395192	31.30008863	1.015239841	0.461700113	0.577382705	0.738249209	0.970939002	20.28742972	1.533456641	0.745313795	0.765624479	0.146001438	0.677905873	0.185298197	0.339247294	0.74590251
KK6001	B6J-Tg(Fcer1g-cre)NIDA168Htz/Mmucd_M_5033	UNCLASSIFIED	Final	0	FALSE	FALSE		TRUE	XY	0.571631206	0.687943262	1.0575	6963.57	57	7	0	0.054370745	524.2725527	FALSE	0.212821958	0.469586911	31.59285956	1.110206852	0.484808994	0.524300248	0.781639619	0.941040681	18.94101063	1.49434905	0.678387941	0.773597764	0.158252225	0.664027485	0.203056848	0.339624784	0.687004214
SZ6465	B6N/Tyr<c-Brd>BrdCrCrl	INBRED	Final	B6N-Tyr<c-Brd>/BrdCrCrl	FALSE	FALSE		TRUE	XY	0.672316384	0.723163842	1.062	15899.9	6	5	0	0.060552383	420.5479982	TRUE	0.24886954	0.399813917	1.146611218	1.137680343	0.45880801	0.549500423	0.76101123	0.879250992	0.59088434	1.456047189	0.73560226	0.902898944	0.187737068	0.688369249	0.21245421	0.274907445	0.769942106
CZ9843	B6N/Tyr<c-Brd>BrdCrCrl_M1001	INBRED	Final	B6N-Tyr<c-Brd>/BrdCrCrl	FALSE	TRUE	B6N/Tyr<c-Brd>BrdCrCrl_M1001	TRUE	XY	0.626119755	0.683168317	1.0605	5037.33	9	6	0	0.028522952	153.8391001	TRUE	0.322194407	0.471876836	1.171056566	1.042218507	0.519521111	0.687864214	1.000728284	0.817496345	0.795460868	1.565709973	0.656299882	0.792880136	0.168343104	0.609846715	0.223928091	0.407358548	0.860773227
WY9706	B6N/Tyr<c-Brd>BrdCrCrl_M1001	INBRED	Final	B6N-Tyr<c-Brd>/BrdCrCrl	FALSE	TRUE	B6N/Tyr<c-Brd>BrdCrCrl_M1001	TRUE	XY	0.63878327	0.742395437	1.052	5293.57	9	3	0	0.030575445	114.2094813	TRUE	0.297719483	0.445445775	1.108513914	0.992902033	0.51836438	0.598083683	0.997813649	0.763189539	0.70406124	1.532046326	0.585237918	0.781702552	0.149426467	0.640210234	0.240858085	0.397840883	0.821562204
EY2426	BALB/cAnNCrl	INBRED	Final	BALB/cAnNCrl	FALSE	FALSE		TRUE	XY	0.729562738	0.756653992	1.052	15901.73	0	6	0	0.086366132	825.4783814	TRUE	0.221170973	0.458440828	1.271560157	1.324007297	0.528810552	0.522584812	0.692755029	0.975240105	0.695396252	1.629005654	0.752496975	0.797083333	0.17130217	0.767275246	0.19752574	0.279780966	0.792618409
MR3479	BALB/cAnNCrl_F1001	INBRED	Final	BALB/cAnNCrl	FALSE	FALSE		TRUE	XX	0.903938521	0.029779059	1.041	6492.08	2	3	0	0.040725895	154.3534438	TRUE	0.256466359	0.367524764	1.005070866	0.881997821	0.419126104	0.483512253	0.881381685	0.741364916	0.630614579	1.144163432	0.498761604	0.715025128	0.104588984	0.520942478	0.21811193	0.346268093	0.69469266
CX8025	BALB/cAnNCrl_M1002	INBRED	Final	BALB/cAnNCrl	FALSE	FALSE		TRUE	XY	0.627272727	0.69138756	1.045	5146.8	1	9	0	0.044259829	265.3440495	TRUE	0.261910438	0.409186485	0.884822058	0.659050597	0.370133074	0.517992008	0.860535111	0.608145156	0.573754839	1.27438469	0.399277411	0.653027435	0.149024708	0.515854757	0.223051322	0.333022619	0.708013083
KA9536	BALB/cAnNHsd_M1001	INBRED	Final	BALB/cAnNHsd	FALSE	TRUE	BALB/cAnNHsd_M1001	TRUE	XY	0.577397911	0.584995252	1.053	5223.4	4	16	0	0.070140567	865.9929331	TRUE	0.331967998	0.600950142	1.191945072	1.088564035	0.521691346	0.672551082	0.963741004	0.876632908	0.758319054	1.678218841	0.626221062	0.843129794	0.109507321	0.643259788	0.24600858	0.384807195	0.909370236
TL0150	BALB/cAnNHsd_M1002	INBRED	Final	BALB/cAnNHsd	FALSE	TRUE	BALB/cAnNHsd_M1001	TRUE	XY	0.609756098	0.635102822	1.0455	5818.39	2	6	0	0.064255436	572.7536755	TRUE	0.262959489	0.42107892	1.012823705	0.906093089	0.446859262	0.570604904	0.903171317	0.804002934	0.681116637	1.395060243	0.512685069	0.787503516	0.168431568	0.628524739	0.249038104	0.379486635	0.750379823
EF4250	BALB/cAnNHsd_M1003	INBRED	Final	BALB/cAnNHsd	FALSE	TRUE	BALB/cAnNHsd_M1001	TRUE	XY	0.517039922	0.580817916	1.027	4137.37	11	53	1	0.115598506	2644.675008	TRUE	0.318076733	0.455120432	1.054535552	0.951088104	0.484607788	0.657181335	1.093690894	0.909274065	0.767879773	1.575881686	0.640745759	0.866009828	0.143569589	0.602315516	0.298257362	0.436509559	0.869393623
BN8785	BALB/cAnNHsd_Mxxx	INBRED	Final	BALB/cAnNHsd	FALSE	TRUE	BALB/cAnNHsd_M1001	TRUE	XY	0.647478592	0.683634634	1.051	5304.62	2	4	0	0.029029212	75.68975574	TRUE	0.249593972	0.453944324	1.143532504	1.103190276	0.453755809	0.65659804	0.966705355	0.855104425	0.744634585	1.369562091	0.677523215	0.782903147	0.144025525	0.637369502	0.296157198	0.401348615	0.878103265
LB7264	BALB/cByJ_F1001	INBRED	Final	BALB/cByJ	FALSE	TRUE	BALB/cByJ_F001	TRUE	XX	0.891762452	0.028735632	1.044	4840.67	3	2	1	0.034693609	93.8493071	TRUE	0.259055236	0.445186629	1.079396815	0.909585488	0.470802936	0.556948098	0.767869466	0.715603936	0.707340611	1.463641422	0.551576937	0.802575431	0.175389071	0.552403269	0.208235787	0.341275318	0.918468562
YP2180	BALB/cByJ_F1003	INBRED	Final	BALB/cByJ	FALSE	FALSE		TRUE	XX	0.849229287	0.034682081	1.038	5987.85	5	11	1	0.084511311	1117.073648	TRUE	0.302446031	0.412836327	0.996184746	0.779078263	0.356555647	0.539092097	0.784923438	0.803460991	0.639295089	1.276753124	0.616749416	0.732483872	0.12926186	0.611405257	0.218609528	0.37876731	0.676036186
PU1539	BALB/cByJ_M1002	INBRED	Final	BALB/cByJ	FALSE	FALSE		TRUE	XY	0.665711557	0.722540592	1.047	5568.58	2	7	0	0.025016473	58.77238599	TRUE	0.253386157	0.435658977	1.073524058	0.969727319	0.40800379	0.607875366	0.887300497	0.653668044	0.65456594	1.316315046	0.521318223	0.800563775	0.141867515	0.560825633	0.224294337	0.337070033	0.846895192
QP4625	BALB/cByJRj_M1001	INBRED	Final	BALB/cByJRj	FALSE	TRUE	BALB/cByJRj_M1001	TRUE	XY	0.619731801	0.648467433	1.044	4887.05	2	10	0	0.053382385	451.5846143	TRUE	0.249639435	0.419476099	1.039277613	0.799460058	0.382234806	0.572124475	0.789228934	0.738891802	0.696125702	1.268045554	0.505212921	0.634125088	0.165744215	0.463674556	0.250662547	0.323098907	0.775109982
DH1526	BALB/cByJRj_M1001	INBRED	Final	BALB/cByJRj	FALSE	TRUE	BALB/cByJRj_M1001	TRUE	XY	0.659847764	0.750713606	1.051	5185.79	1	7	0	0.032533494	73.88186378	TRUE	0.293494319	0.441591321	1.124225941	0.94334705	0.478615572	0.646574542	0.980949805	0.75128375	0.662579817	1.457444195	0.613021315	0.862549337	0.171622828	0.62613407	0.269197155	0.408423764	0.885303824
MY9938	BALB/cByJRj_M1001	INBRED	Final	BALB/cByJRj	FALSE	TRUE	BALB/cByJRj_M1001	TRUE	XY	0.673177704	0.718913768	1.0495	5802.77	1	4	0	0.022321546	58.36337989	TRUE	0.229717811	0.394122006	0.955060847	0.95661183	0.485630001	0.577137997	0.739129551	0.769632217	0.708109892	1.294036792	0.596439118	0.634179704	0.15303032	0.643140939	0.201455455	0.33242735	0.787899349
GX6649	BALB/c-Gnptabtm1Ddray/Mmmh_M_391SR	UNCLASSIFIED	Final	0	FALSE	FALSE		TRUE	XY	0.638941399	0.665406427	1.058	6566.88	2	7	0	0.033991873	107.9954925	FALSE	0.253545191	0.441001124	1.343408812	1.089711342	0.481507443	0.697591903	0.757285425	1.108593987	0.907128349	1.484724089	0.626172867	0.855505634	0.188674169	0.729722855	0.220043724	0.353745032	0.817131227
YQ9332	BALB/cJ_F1001	INBRED	Final	BALB/cJ	FALSE	FALSE		TRUE	XX	0.909047161	0.040423484	1.039	5408.94	0	5	0	0.049243356	181.9285001	TRUE	0.257351926	0.445004371	1.041239975	0.827149796	0.428550118	0.572940817	0.83103226	0.782778774	0.610841065	1.163999802	0.522653659	0.746542439	0.132373548	0.522283901	0.289890675	0.402667022	0.722877895
ZW8992	BALB/cJ_F1003	INBRED	Final	BALB/cJ	FALSE	TRUE	BALB/cJ_F003	TRUE	XX	0.906280193	0.03236715	1.035	4553.58	0	5	0	0.04781902	185.8820438	TRUE	0.31908941	0.460516512	1.087934575	0.865033163	0.402759792	0.730194279	0.999652439	0.76599027	0.639716071	1.309079128	0.462053764	0.759841265	0.144940819	0.704719832	0.309646296	0.381238276	0.933550641
XB5751	BALB/cJ_M1002	INBRED	Final	BALB/cJ	FALSE	TRUE	BALB/cJ_M002	TRUE	XY	0.622848948	0.651529637	1.046	4397.49	0	9	0	0.045103229	235.6538081	TRUE	0.299489269	0.432747212	1.003073018	0.866858841	0.430927991	0.712907257	1.023766658	0.784993892	0.778626619	1.298241637	0.458216307	0.830701822	0.158954441	0.55599944	0.235361726	0.391814738	0.911429757
RW9951	BALB/cJBomTac	INBRED	Final	BALB/cJBomTac	FALSE	TRUE	BALB/cJBomTac_M	TRUE	XY	0.617183771	0.665871122	1.0475	5730.45	1	8	0	0.045798375	275.2310992	TRUE	0.30207054	0.396827503	1.144761837	0.989625668	0.410439	0.78283561	0.947046112	0.772365228	0.612866398	1.881876777	0.623336781	0.801856805	0.159324323	0.510780167	0.289680587	0.333132675	0.789466853
DN5468	BALB/cJBomTac	INBRED	Final	BALB/cJBomTac	FALSE	TRUE	BALB/cJBomTac_M	TRUE	XY	0.651006711	0.707574305	1.043	4849.93	3	13	0	0.049454206	251.1833691	TRUE	0.278973231	0.442687012	1.000427285	0.951560578	0.47794527	0.522688205	0.870116064	0.671762592	0.70537134	1.270740594	0.465573951	0.665783121	0.158352876	0.598359436	0.252168708	0.334231787	0.795681965
MW6253	BALB/cJBomTac	INBRED	Final	BALB/cJBomTac	FALSE	TRUE	BALB/cJBomTac_M	TRUE	XY	0.65351711	0.682509506	1.052	4919.98	1	6	0	0.035555678	137.3167377	TRUE	0.298172198	0.461994142	1.151021922	0.988826002	0.489839808	0.810166587	0.917890694	0.716263686	0.683336695	2.002042368	0.622157532	0.992484557	0.132927483	0.584352468	0.268903762	0.372969314	0.897158885
DU7551	BDP/J	INBRED	Final	BDP/J	FALSE	TRUE	BDP/J_MjaxDNA	TRUE	XY	0.68957346	0.799526066	1.055	9338.51	5	22	0	0.031734022	143.522359	TRUE	0.395566242	0.544198062	1.339828051	1.090751961	0.568398921	0.769287462	1.227497519	1.027358562	0.853347965	1.663005885	0.749048691	1.206187913	0.155699328	0.805160415	0.32863909	0.50275677	1.132728671
MQ5866	Cr_LTWV_2909	CROSS	Final	0	FALSE	FALSE		TRUE	XX*	0.624652456	0.036144578	1.079	9246.16	2573	122	151	0.148156161	6108.297195	FALSE	0.215873345	0.43758695	1.328226727	1.120140397	0.490041145	0.67833548	0.812985938	1.18524849	0.620149178	1.480722427	0.947636396	0.863385226	0.114101392	0.678011021	0.188510641	0.341871565	0.840673101
HL0190	BK_eRCyc_F127	CELL LINE	Final	0	FALSE	TRUE	BK_eRCyc_F127	TRUE	XX	0.905405405	0.056949807	1.036	9654.99	4	28	1	0.039195036	134.8407667	FALSE	0.457483769	0.51092765	34.50382564	0.993061892	0.434490471	22.5654361	1.021026714	0.807872628	0.769032598	1.646092266	0.536821004	1.042362837	0.174003335	0.662248408	0.316831073	0.491766569	0.954843302
EE0032	BK_eRCyc_M125	CELL LINE	Final	0	FALSE	TRUE	BK_eRCyc_M125	TRUE	XY	0.661105815	0.705433746	1.049	10046.01	1	8	1	0.023044147	72.5465095	FALSE	0.365020444	0.480986852	30.78893196	1.080428661	0.458092196	20.74723646	1.115766064	0.860142257	0.705254935	1.707144973	0.643538907	1.039417365	0.145331292	0.698386538	0.3326693	0.505175553	0.894484241
GN3715	BK_eRCyc_M126	CELL LINE	Final	0	FALSE	TRUE	BK_eRCyc_M126	TRUE	XY	0.681731684	0.722169363	1.051	11303.1	0	9	0	0.029262025	102.2442258	FALSE	0.405729408	0.602047236	31.41279876	1.062186497	0.465889896	21.34149073	1.067494775	1.007688172	0.731834641	1.532323016	0.656280146	0.979377355	0.195521586	0.845874154	0.309914984	0.487742309	0.877016054
NZ3611	BTBR T<+>tf/J	INBRED	Final	BTBR T<+> Itpr3<tf>/J	FALSE	TRUE	BTBR T<+>tf/J_MjaxDNA	TRUE	XY	0.61734213	0.63336475	1.061	9325.08	4	13	0	0.020618274	65.03877011	TRUE	0.390023344	0.512595982	1.21500261	0.904013416	0.53189876	0.59538345	1.203528181	0.867445376	0.845032707	2.160945949	0.630771876	0.984870606	0.187022467	0.729430517	0.232062281	0.492542541	0.844925469
CM1842	BUB/BnJ	INBRED	Final	BUB/BnJ	FALSE	TRUE	BUB/BnJ_M	TRUE	XY	0.668714556	0.728733459	1.058	10504.31	4	18	0	0.034591478	135.235154	TRUE	0.306160075	0.511313981	1.189226262	1.005587336	0.480374297	0.709232761	0.994829846	0.863264789	0.688574572	1.599819671	0.648495781	1.015297637	0.167645489	0.748073964	0.281027532	0.459716108	0.999684996
FI5504	BXD31/TyJ_F_001	INBRED	Final	BXD31/TyJ	FALSE	FALSE		TRUE	XX	0.817836812	0.032732448	1.054	10834.61	1	3	0	0.043733802	162.1496718	FALSE	0.212005842	0	1.544587624	1.691339601	0.696656552	0.840824216	0.778154662	1.276280709	0.807505057	1.952170472	0.951488128	0.921583952	0.13789148	0.866298144	0.171118342	0.291473422	0.924629747
AU7016	BXD6/TyJ_F001	INBRED	Final	BXD6/TyJ	FALSE	TRUE	BXD6/TyJ_F001	TRUE	XX	0.84838403	0.042775665	1.052	10846.95	1	3	0	0.026461674	66.03907067	TRUE	0.247535051	0.479858452	1.122988626	1.054121332	0.503828326	0.545130264	0.698537462	0.901820437	0.657604291	1.407400408	0.644605244	0.785289969	0.144188015	0.722599528	0.246889709	0.3045096	0.831662458
HZ3077	BXD6/TyJ_F001	INBRED	Final	0	FALSE	TRUE	BXD6/TyJ_F001	TRUE	XX	0.840132827	0.018975332	1.054	15888.7	1	2	0	0.025359104	64.35797902	FALSE	0.16993207	0.304744846	0.877982363	0.818506139	0.432319775	0.46139704	0.556307248	0.732029596	0.514579484	1.173223601	0.543593812	0.698924312	0.095602524	0.586643269	0.12895956	0.203729671	0.569838876
SC8961	C3H/HeJ_F1001	INBRED	Final	C3H/HeJ	FALSE	FALSE		TRUE	XX	0.896353167	0.036948177	1.042	6510.66	2	5	0	0.036225566	141.6433977	TRUE	0.302580715	0.439433212	1.076849439	1.028467244	0.432675064	0.668288676	0.81297448	0.661376934	0.716056495	1.84236329	0.541112619	0.756605383	0.128712	0.571217097	0.244829269	0.423766596	0.835552838
DF7546	C3H/HeJ_M1002	INBRED	Final	C3H/HeJ	FALSE	TRUE	C3H/HeJ_M002	TRUE	XY	0.616929699	0.909612626	1.0455	5356.27	3	12	0	0.046392488	311.6355011	TRUE	0.368726922	0.435751208	1.170591291	0.82893546	0.367420042	0.59425711	0.965411095	0.693766705	0.64914608	1.21166467	0.422495709	0.661841488	0.143383431	0.552063548	0.287887045	0.396171407	0.791409328
ZM2501	C3H/HeJ_M1003	INBRED	Final	C3H/HeJ	FALSE	FALSE		TRUE	XY	0.637667304	0.92543021	1.046	5142.19	1	14	0	0.043474632	273.1660534	TRUE	0.299677629	0.498620014	1.00579669	0.888726	0.399051587	0.648750533	1.162539174	0.689783615	0.648556063	1.214268084	0.450974966	0.738595481	0.145268779	0.643305385	0.297343994	0.432111416	0.998406845
TZ1815	C3H/HeNCrl_M1001	INBRED	Final	C3H/HeNCrl	FALSE	TRUE	C3H/HeNCrl_M1002	TRUE	XY	0.651328273	0.719639469	1.054	5524.06	1	6	0	0.031306831	101.0594146	TRUE	0.304848054	0.46632339	1.138292498	1.013565473	0.482977796	0.694597378	0.924500602	0.791989452	0.735147238	1.532567475	0.551586711	0.838151123	0.146450164	0.668891663	0.2456525	0.377077492	0.880511245
WP1288	C3H/HeNCrl_M1002	INBRED	Final	C3H/HeNCrl	FALSE	TRUE	C3H/HeNCrl_M1002	TRUE	XY	0.686124402	0.727272727	1.045	5451.96	4	24	0	0.036296947	252.6443756	TRUE	0.269994861	0.40829386	0.885186957	0.669667961	0.328872817	0.636102024	0.928474177	0.604553711	0.59960136	1.140141344	0.443510581	0.69938207	0.131145602	0.520180317	0.256788591	0.384632625	0.89527508
GT5371	C3H/HeNCrl_M1002	INBRED	Final	C3H/HeNCrl	FALSE	TRUE	C3H/HeNCrl_M1002	TRUE	XY	0.713876967	0.757749165	1.0485	6704.99	1	8	0	0.048314298	177.8245502	TRUE	0.222968215	0.403132498	0.875616314	0.806563282	0.36510113	0.510664326	0.786130743	0.692170893	0.603878463	1.173752409	0.508278044	0.592096196	0.107979256	0.504847764	0.217151653	0.345414305	0.702014306
YU2851	C3H/HeNHsd_F1001	INBRED	Final	C3H/HeNHsd	FALSE	FALSE		TRUE	XX	0.866176471	0.05	1.02	4952.98	7	47	0	0.082296288	863.7782471	TRUE	0.404201499	0.490614207	1.123769003	0.859281509	0.508785104	0.793462484	1.024434769	0.660411141	0.565518681	1.279836815	0.521504732	0.905516346	0.184939347	0.533416764	0.262266607	0.480115467	0.884115068
UQ6915	C3H/HeNHsd_Mxxx	INBRED	Final	C3H/HeNHsd	FALSE	FALSE		TRUE	XY	0.669659735	0.737240076	1.058	14823.16	1	2	0	0.045481002	189.1107566	TRUE	0.225323029	0.301824919	0.905879529	0.957487948	0.34297673	0.447475344	0.600344201	0.785932121	0.566410823	1.370962451	0.53301714	0.699445857	0.122106192	0.609451569	0.193548434	0.250418887	0.653234397
ZD8738	C3H/HeNHsd_Mxxx	INBRED	Final	C3H/HeNHsd	FALSE	FALSE		TRUE	XY	0.639019793	0.734213007	1.061	14659.25	1	2	0	0.034853942	109.6390981	TRUE	0.224568063	0.32163986	0.954959999	0.823370754	0.415096192	0.448999694	0.652011406	0.867847782	0.584750133	1.272779746	0.604601076	0.790695146	0.168289615	0.589184192	0.186435151	0.223681251	0.708494503
FG1953	C3H/HeNRj_M1001	INBRED	Final	C3H/HeNRj	FALSE	TRUE	C3H/HeNRj_M1001	TRUE	XY	0.602601156	0.649325626	1.038	5247.85	4	22	0	0.067276521	757.2924794	TRUE	0.307363888	0.403403193	0.929904384	0.755737866	0.359575732	0.517354591	0.865687626	0.669035715	0.576426385	1.140847858	0.394256592	0.731537486	0.147488933	0.482292622	0.304696129	0.482483176	0.707908768
LV1369	C3H/HeNRj_M1001	INBRED	Final	C3H/HeNRj	FALSE	TRUE	C3H/HeNRj_M1001	TRUE	XY	0.609239654	0.685274302	1.039	5245.86	5	28	1	0.068867779	753.963988	TRUE	0.313389987	0.482856957	0.912719743	0.808828293	0.343127723	0.628304986	0.98611095	0.605048551	0.496582065	1.266713177	0.446447293	0.776803039	0.128291643	0.45750363	0.23561437	0.410037629	0.835706632
QE2405	C3H/HeNRj_M1001	INBRED	Final	C3H/HeNRj	FALSE	TRUE	C3H/HeNRj_M1001	TRUE	XY	0.601435407	0.677033493	1.045	5333.15	3	14	0	0.063529541	713.5452745	TRUE	0.271696899	0.398451285	0.939970019	0.675585872	0.412139258	0.483204217	0.762776388	0.560831902	0.486391827	1.158415076	0.372762896	0.673523301	0.150005189	0.525768189	0.23588316	0.432952478	0.733712883
YR6248	C3H/HeNTac_F1001	INBRED	Final	C3H/HeNTac	FALSE	FALSE		TRUE	XX	0.881033642	0.037055095	1.0255	5442.84	19	14	0	0.073786514	876.4075225	TRUE	0.289187122	0.404568007	0.835960233	0.680894203	0.303517869	0.605933373	0.823099306	0.497534134	0.542731105	1.408638924	0.415775386	0.8117082	0.149737932	0.513334701	0.245276244	0.452520891	0.713965157
XQ7810	C3H/HeNTac_F1002	INBRED	Final	C3H/HeNTac	FALSE	TRUE	C3H/HeNTac_F002	TRUE	XX	0.872568093	0.037937743	1.028	5679.56	18	20	0	0.075274544	865.0732937	TRUE	0.293860706	0.368690425	0.937924495	0.577685427	0.387177767	0.442639794	0.921021782	0.518702001	0.607969454	1.150440895	0.415701095	0.823126903	0.139447381	0.459542506	0.282240091	0.386649557	0.694243718
SY5445	C3H/HeNTac_M1003	INBRED	Final	C3H/HeNTac	FALSE	FALSE		TRUE	XY	0.580614203	0.631477927	1.042	5974.16	8	24	1	0.067531298	764.8303437	TRUE	0.257107428	0.380137349	0.771657059	0.710058404	0.36155732	0.506849799	0.985411086	0.497476091	0.511871429	1.111453985	0.497141315	0.704199836	0.108132421	0.504004209	0.22563855	0.420310385	0.72244509
ZH5639	C3H/HeOuJ_M001	INBRED	Final	C3H/HeOuJ	FALSE	FALSE		TRUE	XY	0.573557692	0.621153846	1.04	5532.64	2	19	0	0.077778388	1202.27743	TRUE	0.302568039	0.357695429	0.870109043	0.689002009	0.400351377	0.507171993	0.828176077	0.576578282	0.560491928	1.153337309	0.344139514	0.756239351	0.132486483	0.513678833	0.263707747	0.370528363	0.782808946
LS8337	C3HeB/FeJ_F001	INBRED	Final	C3HeB/FeJ	FALSE	FALSE		TRUE	XX	0.869733656	0.046973366	1.0325	4201.21	8	35	0	0.08218647	880.1113282	TRUE	0.334903677	0.499618208	1.088496458	0.904025705	0.534132091	0.653859561	1.202987339	0.623868187	0.708129666	1.600968113	0.552222126	0.916879151	0.224221225	0.654573641	0.323240365	0.51794627	0.904739785
QS8713	C3HeB/FeJ_M001	INBRED	Final	C3HeB/FeJ	FALSE	FALSE		TRUE	XY	0.620180866	0.646358877	1.0505	5171.78	2	12	0	0.044028113	267.7744588	TRUE	0.32870708	0.498087904	1.184118916	1.022279018	0.46831091	0.738430787	0.969685885	0.743458072	0.680617012	1.522493851	0.568663248	0.80571906	0.143277615	0.645812733	0.294869586	0.468890981	0.938362034
PY6128	C3N.129P2(B6)-Tcrdtm1Mom/Mmnc_M_31877	UNCLASSIFIED	Final	0	FALSE	FALSE		TRUE	XY	0.708747045	0.754137116	1.0575	10106.81	52	4	0	0.039245552	169.3021068	FALSE	0.326413502	0.435547813	1.150214295	1.007043535	0.429215451	0.641250654	0.977756358	0.850020732	0.687457112	1.813925047	0.65302489	0.974887007	0.175920948	0.686665566	0.316618129	0.431293257	0.984781323
IK7259	C3Tag-p16-Luc_F_DD	UNCLASSIFIED	Final	0	FALSE	TRUE	C3Tag-p16-Luc_F_DD	TRUE	XX	0.919447092	0.052430887	1.049	11079.05	17	23	1	0.038990775	115.8711594	FALSE	0.339379392	0.495168975	1.320059472	1.196131837	0.494627412	10.04788653	40.2121255	0.936452446	0.707551877	1.587140222	0.651139079	0.962898766	0.168065008	0.672891854	0.264463197	0.412039076	1.025810318
KQ7692	C57BL/10J	INBRED	Final	C57BL/10J	FALSE	FALSE		TRUE	XY	0.654026217	0.711610487	1.068	11177.88	2	7	0	0.026424336	134.4557615	TRUE	0.386745848	0.528185863	1.404648754	1.123200121	0.552788017	0.818043959	1.064870652	1.175803998	0.866174717	2.054056135	0.77250761	1.133398832	0.220256368	0.840588478	0.373237029	0.525859842	1.066123126
ML7111	C57BL/10ScNHsd	INBRED	Final	C57BL/10ScNHsd	FALSE	FALSE		TRUE	XY	0.679378531	0.719397363	1.062	9461.41	8	10	0	0.022978256	115.1638827	TRUE	0.370557836	0.5692597	1.328026017	1.049103561	0.530893329	0.76870141	1.112624742	0.97237082	0.865621415	1.746251162	0.774303112	1.009257496	0.154628099	0.786034977	0.324475915	0.438412409	0.954403099
TH3739	C57BL/10ScNHsd_Mxxx	INBRED	Final	C57BL/10ScNHsd	FALSE	FALSE		TRUE	XY	0.663524976	0.677662582	1.061	9308.59	11	19	0	0.023762354	78.33837077	TRUE	0.394259403	0.577423513	1.391402668	1.197495795	0.578605217	0.823110503	1.153772749	0.96061787	0.771008103	1.889437162	0.771222958	1.231228071	0.199493109	0.794427326	0.428958528	0.577316085	1.063640967
BU7560	C57BL/10SnJ	INBRED	Final	C57BL/10SnJ	FALSE	FALSE		TRUE	XY	0.614258735	0.634560907	1.059	9091.05	8	21	0	0.039221392	270.8847755	TRUE	0.345064834	0.526012125	1.310740377	1.214601816	0.516662265	0.659990119	0.950825765	0.766028532	0.832357539	1.733794044	0.673079923	1.051034265	0.205806919	0.765588538	0.326915106	0.463643059	0.960945614
SJ6488	C57BL/10SnJ_Mxxx	INBRED	Final	C57BL/10SnJ	FALSE	FALSE		TRUE	XY	0.623333333	0.634285714	1.05	8888.98	13	52	1	0.068115528	859.5628318	TRUE	0.321409368	0.534932288	1.308362252	1.183150972	0.559457049	0.593994212	0.966590582	0.953315711	0.804817158	1.713358306	0.549894642	1.081339464	0.174260802	0.786929833	0.259534971	0.443695677	1.029027474
RC3806	C57BL/6ByJ_M1001	INBRED	Final	C57BL/6ByJ	FALSE	TRUE	C57BL/6ByJ_M1001	TRUE	XY	0.601123596	0.634831461	1.068	11376.96	4	21	0	0.040250384	219.679653	TRUE	0.27098619	0.373034508	1.175181756	1.150746414	0.464359403	0.702823734	0.828780013	0.866751481	0.687617568	1.654483635	0.684453279	0.977677388	0.179661295	0.773756544	0.237585362	0.340688443	0.79098434
TX7451	C57BL/6ByJ_M1001	INBRED	Final	C57BL/6ByJ	FALSE	TRUE	C57BL/6ByJ_M1001	TRUE	XY	0.595864662	0.625	1.064	11769.3	4	11	0	0.033298924	162.8112561	TRUE	0.268665112	0.369860605	1.028183594	1.063869662	0.466892724	0.513369579	0.765041326	0.967007478	0.675486288	1.459815084	0.622297054	0.921295324	0.143848841	0.695028659	0.195423706	0.280050667	0.783054293
GI7230	C57BL/6ByJ_M1001	INBRED	Final	C57BL/6ByJ	FALSE	TRUE	C57BL/6ByJ_M1001	TRUE	XY	0.623584906	0.635849057	1.06	12048.16	4	17	0	0.029884691	105.5662617	TRUE	0.278631768	0.395247089	1.264093483	1.042731873	0.447371233	0.596771645	0.824441272	1.041818871	0.67130585	1.767904872	0.621837714	0.912836515	0.148570409	0.711892962	0.219867606	0.356485982	0.816224249
XB8053	C57BL/6-Itsn2tm1.1(KOMP)Vlcg/Mmmh_M_326SR	UNCLASSIFIED	Final	0	FALSE	FALSE		TRUE	XY	0.619114878	0.706685499	1.062	8121.83	52	5	0	0.025403031	113.3427869	FALSE	0.220147433	0.352137393	1.134350279	0.96985533	0.42551987	0.506536096	0.70489041	0.824198499	0.686667916	1.381954579	0.763251642	0.812378503	0.115737465	0.692577914	0.197615565	0.288112412	0.759434769
IP7230	C57BL/6J_F1002	INBRED	Final	C57BL/6J	FALSE	TRUE	C57BL/6J_F002	TRUE	XX	0.871075167	0.025214082	1.051	13587.62	4	3	0	0.057321546	270.9099974	TRUE	0.25412839	0.373869743	1.149502267	1.048307209	0.45379544	0.525625532	0.71366435	0.88220012	0.640803908	1.437190619	0.653904068	0.775338138	0.175233043	0.665900283	0.235140518	0.357678534	0.751124921
GC7589	C57BL/6J_M1001	INBRED	Final	C57BL/6J	FALSE	FALSE		TRUE	XY	0.650756144	0.719754253	1.058	14363.42	4	1	0	0.053717329	323.8071307	TRUE	0.219098259	0.32715053	0.973793247	0.946014345	0.464931101	0.586838013	0.659104931	0.892962908	0.562609797	1.369103039	0.615661234	0.795005726	0.116685314	0.662516375	0.210534838	0.26755469	0.681174886
YQ3875	C57BL/6J_M1003	INBRED	Final	C57BL/6J	FALSE	TRUE	C57BL/6J_M003	TRUE	XY	0.679584121	0.711247637	1.058	13122.49	2	3	0	0.047417088	254.4602975	TRUE	0.288740834	0.46949915	1.226748468	1.137969616	0.555534621	0.68035845	0.854944159	1.072814321	0.739188728	1.490189235	0.744142054	0.902343683	0.137854888	0.720366087	0.234406652	0.303829429	0.90744942
EC8331	C57BL/6JBomTac_M1001	INBRED	Final	C57BL/6JBomTac	FALSE	TRUE	C57BL/6JBomTac_M001	TRUE	XY	0.650141643	0.696883853	1.059	13216.72	4	2	0	0.040086756	173.2718755	TRUE	0.229860364	0.381713474	1.19507717	0.938356889	0.451170951	0.555735474	0.69737425	0.82615053	0.596063181	1.341936605	0.660073012	0.797474731	0.148902303	0.6003759	0.196720522	0.298409899	0.799366274
IZ2296	C57BL/6JBomTac_M1002	INBRED	Final	C57BL/6JBomTac	FALSE	TRUE	C57BL/6JBomTac_M002	TRUE	XY	0.550232558	0.553953488	1.075	11529.39	4	15	0	0.057648803	651.7336262	TRUE	0.22984735	0.426215048	1.099450946	1.029629393	0.4883172	0.644700133	0.736552338	2.199422301	0.596822496	1.58551304	0.652506269	0.86465971	0.117005311	0.663868534	0.179541137	0.300709722	0.740455406
HI0165	C57BL/6JBomTac_M1003	INBRED	Final	C57BL/6JBomTac	FALSE	TRUE	C57BL/6JBomTac_M003	TRUE	XY	0.685080264	0.717658168	1.059	14851.79	3	5	0	0.059654074	504.9026709	TRUE	0.259497326	0.378338213	1.083371035	0.933018797	0.388505337	0.529767763	0.736813502	0.701935553	0.648002663	1.493961251	0.628072406	0.977255886	0.148130285	0.742065393	0.207988386	0.275320333	0.735668858
IT8837	C57BL/6J-Cacna1ctm1Wac/Mmmh_M_387SR	UNCLASSIFIED	Final	0	FALSE	FALSE		TRUE	XY	0.638548539	0.720075401	1.061	7709.5	22	2	0	0.015629255	55.73298867	FALSE	0.216486077	0.391464938	1.01718623	1.023152893	0.481354004	0.499513411	0.69342994	0.834165346	0.49691921	1.325896155	0.628574914	0.758155256	0.14890714	0.608340145	0.166547707	0.304818623	1.28828024
CD9789	C57BL/6JEiJ_M1001	INBRED	Final	C57BL/6JEiJ	FALSE	TRUE	C57BL/6JEiJ_M1001	TRUE	XY	0.599437148	0.630393996	1.066	12383.48	2	4	0	0.03131342	122.7636978	TRUE	0.25840872	0.385917273	1.109300184	0.928817843	0.437033748	0.491703343	0.73816066	0.780394335	0.587233816	1.42092495	0.750273568	0.839182319	0.120240808	0.658215462	0.206323212	0.286833679	0.773288095
AQ2173	C57BL/6JEiJ_M1001	INBRED	Final	C57BL/6JEiJ	FALSE	TRUE	C57BL/6JEiJ_M1001	TRUE	XY	0.64084507	0.65258216	1.065	13470.23	2	3	0	0.025040633	69.70496957	TRUE	0.240381869	0.4057836	4.11923063	0.995305658	0.495165864	0.509271039	0.769994054	1.110596901	0.647056323	1.647261673	0.631169442	0.910229184	0.13823071	0.718473048	0.226128219	0.296802567	0.842301633
TD2934	C57BL/6JEiJ_M1001	INBRED	Final	C57BL/6JEiJ	FALSE	TRUE	C57BL/6JEiJ_M1001	TRUE	XY	0.597572362	0.644257703	1.071	12954.07	2	6	0	0.015926861	68.2057637	TRUE	0.266865968	0.461939819	2.118330642	1.13925599	0.576575619	0.738069286	0.86521081	1.004935254	0.703871535	1.725095108	0.719542288	1.00370012	0.17399939	0.839195817	0.222941543	0.322524158	0.816268657
RT8909	C57BL/6JOlaHsd_M_7601	INBRED	Final	C57BL/6JOlaHsd	FALSE	TRUE	C57BL/6JOlaHsd_M001	TRUE	XY	0.62406015	0.701597744	1.064	13440.82	3	4	0	0.021111355	68.70189687	TRUE	0.228185533	0.330783463	1.03632093	1.008792841	0.402877294	0.551603372	0.69088062	0.89317487	0.591035499	1.28861214	0.593565107	0.757840835	0.122462793	0.621241996	0.182429386	0.230715141	0.733214356
VQ4119	C57BL/6J-Tg(Cbln2-cre/ERT2)NIDA167Htz/Mmucd_M_5042	UNCLASSIFIED	Final	0	FALSE	FALSE		TRUE	XY	0.627840909	0.715435606	1.056	7886.26	4	2	0	0.02177685	54.47703057	FALSE	0.198573238	0.373814754	37.21840694	1.039656434	0.531684282	0.476398246	0.652780988	0.846916127	0.70477015	1.384306536	0.566555061	0.740401746	0.146964484	0.599143389	0.220763734	0.292407335	0.696147557
ZP7795	C57BL/6J-Tg(Cbln2-cre/ERT2)NIDA167Htz/Mmucd_M_5043	UNCLASSIFIED	Final	0	FALSE	FALSE		TRUE	XY	0.616185518	0.735920492	1.0565	8565.19	5	1	0	0.024369646	78.01313745	FALSE	0.263625261	0.378742404	40.00379074	1.019358793	0.380376927	0.594849737	0.698758719	0.929109756	0.778850362	1.431375421	0.583408074	0.748378177	0.144188307	0.567529847	0.24249321	0.273549153	0.744408621
VF9714	C57BL/6J-Tg(Cfh-EGFP/Rpl10A)NIDA092Htz/Mmmh_M_5047	UNCLASSIFIED	Final	0	FALSE	FALSE		TRUE	XY	0.630208333	0.704545455	1.056	8855.41	60	1	0	0.022719086	77.48324425	FALSE	0.273166476	0.365878207	1.399032441	1.086567935	0.392641521	0.593422833	0.722609459	1.019151488	21.76512339	44.57141872	0.690651579	0.936038413	0.105585223	0.710413519	0.200329611	0.378412924	0.762810892
DB0038	C57BL/6J-Tg(GFAP-CHRM3*)6Kdmc/Mmnc_M_32200	UNCLASSIFIED	Final	0	FALSE	FALSE		TRUE	XY	0.672914714	0.718837863	1.067	9249.1	4	4	0	0.0333132	157.0042782	FALSE	0.302948335	0.441340151	1.222280845	1.067130645	0.500048555	0.646981741	0.901601059	0.911764208	0.709366177	2.12885536	0.622438817	1.010044021	0.211263757	0.771101901	0.243374983	0.436582933	0.883004658
EM0574	C57BL/6J-Tg(GFAP-CHRM3*)6Kdmc/Mmnc_M_32201	UNCLASSIFIED	Final	0	FALSE	FALSE		TRUE	XY	0.683490566	0.727358491	1.06	9401.65	3	6	0	0.03249396	145.5580477	FALSE	0.345364816	0.506293971	1.174793469	0.975041352	0.448219074	0.645099356	0.921008297	0.767418278	0.716682516	1.735971408	0.717001609	0.902607277	0.213260381	0.685411418	0.270590727	0.381635035	0.843681466
DX2968	C57BL/6NCrl_M1001	INBRED	Final	C57BL/6NCrl	FALSE	TRUE	C57BL/6NCrl_M1001	TRUE	XY	0.612464855	0.678537957	1.067	12903.67	6	5	0	0.020762135	69.62765138	TRUE	0.224897324	0.393144082	1.148045817	1.096820065	0.45297204	0.55023122	0.693446332	1.044276858	0.662834877	1.608690095	0.638190718	0.964222091	0.177391446	0.761334015	0.20567798	0.276355568	0.795277857
PC6937	C57BL/6NCrl_M1001	INBRED	Final	C57BL/6NCrl	FALSE	TRUE	C57BL/6NCrl_M1001	TRUE	XY	0.613402062	0.670103093	1.067	12344.73	6	2	0	0.017273226	49.96852117	TRUE	0.234189043	0.377813108	1.0734137	0.969563699	0.45987243	0.58292091	0.761620678	0.89260777	0.576278399	1.42036343	0.601957377	0.85769408	0.127260805	0.692198329	0.191822779	0.28919228	0.726625982
PB1736	C57BL/6NCrl_M1001	INBRED	Final	C57BL/6NCrl	FALSE	TRUE	C57BL/6NCrl_M1001	TRUE	XY	0.603480715	0.65098777	1.063	12512.02	6	2	0	0.016340874	46.05864415	TRUE	0.219628862	0.383631199	1.072728741	0.874199596	0.411604308	0.499919407	0.771098711	0.809222061	0.671434522	1.390183559	0.528691747	0.845906795	0.123241523	0.663921744	0.188378904	0.299951644	0.715392264
VX2521	C57BL/6NCrl-Zbtb48em1(IMPC)Mbp/Mmucd_M_1L1R	UNCLASSIFIED	Final	0	FALSE	FALSE		TRUE	XY	0.584543326	0.693208431	1.0675	7079.67	22	8	0	0.053208873	519.8489075	FALSE	0.245774303	0.387023902	1.287772598	1.24440897	0.434342518	0.611045767	0.766844075	0.904562434	0.759499096	1.45600087	0.98380346	0.875041268	0.141249599	0.65921188	0.206365665	0.272046728	0.74749288
YL6052	C57BL/6NHsd_M1001	INBRED	Final	C57BL/6NHsd	FALSE	TRUE	C57BL/6NHsd_M1001	TRUE	XY	0.572565543	0.618913858	1.068	11433.41	3	3	0	0.025527125	90.20466095	TRUE	0.259852516	0.404341361	1.127485287	0.935154192	0.468364263	0.628508981	0.779120234	0.852414212	0.653173542	1.53305113	0.653261005	0.903754982	0.152797828	0.725417964	0.250668903	0.29544995	0.7024152
EV4551	C57BL/6NHsd_M1001	INBRED	Final	C57BL/6NHsd	FALSE	TRUE	C57BL/6NHsd_M1001	TRUE	XY	0.597274436	0.660714286	1.064	12734.78	3	3	0	0.021623106	75.39694772	TRUE	0.21296011	0.405817792	1.114035799	0.979993428	0.467617057	0.603072879	0.762635912	0.859378853	0.537268833	1.431669887	0.624353185	0.82679093	0.125326083	0.662751966	0.198432964	0.303813668	0.749443692
UG2328	C57BL/6NHsd_M1001	INBRED	Final	C57BL/6NHsd	FALSE	TRUE	C57BL/6NHsd_M1001	TRUE	XY	0.624765478	0.659474672	1.066	12305.18	3	3	0	0.016474852	49.44237129	TRUE	0.236973452	0.36334304	1.068981067	0.991777782	0.46517011	0.535872066	0.674269113	0.790642907	0.61478195	1.478564812	0.659072256	0.857037733	0.158794968	0.645907064	0.197315344	0.322222133	0.684021107
LQ8791	C57BL/6NJ_M1001	INBRED	Final	C57BL/6NJ	FALSE	TRUE	C57BL/6NJ_M	TRUE	XY	0.6496695	0.708687441	1.059	13557.36	3	1	0	0.050226224	321.1743576	TRUE	0.273135764	0.368582073	1.081110154	1.005652987	0.427811891	0.610738355	0.725436198	0.957265987	0.604099895	1.459502395	0.631538864	0.903641979	0.150766811	0.719461584	0.228953123	0.323588063	0.808121911
JP4445	C57BL/6NJ_M1001	INBRED	Final	C57BL/6NJ	FALSE	TRUE	C57BL/6NJ_M	TRUE	XY	0.648165569	0.690028222	1.063	12392.54	3	2	0	0.040304195	179.2473354	TRUE	0.260640691	0.390638262	1.071612501	0.940807993	0.381358485	0.549282101	0.771673972	0.740848974	0.621825748	1.460959664	0.580268486	0.89529674	0.167762228	0.603588969	0.233527604	0.356182047	0.667417696
UR4277	C57BL/6NJ_M1001	INBRED	Final	C57BL/6NJ	FALSE	TRUE	C57BL/6NJ_M	TRUE	XY	0.631255902	0.682719547	1.059	12248.95	3	3	0	0.037678454	142.6118347	TRUE	0.273492779	0.382318413	0.997146507	0.98090022	0.472693489	0.51286019	0.845868263	0.871748027	0.597030654	1.404773207	0.645116399	0.7479007	0.174218982	0.643483606	0.218957502	0.371215422	0.726347836
HL1160	C57BL/6NRj_M1001	INBRED	Final	C57BL/6NRj	FALSE	TRUE	C57BL/6NRj_M1001	TRUE	XY	0.658640227	0.714353163	1.059	13884.1	7	2	0	0.053369207	287.3283672	TRUE	0.188272923	0.291628564	0.96808583	1.086206562	0.424082238	0.473491276	0.671703627	0.768793107	0.507486999	1.233857477	0.596653747	0.723489484	0.127123837	0.56870811	0.161407659	0.240995103	0.582897003
RB6338	C57BL/6NRj_M1001	INBRED	Final	C57BL/6NRj	FALSE	TRUE	C57BL/6NRj_M1001	TRUE	XY	0.655335222	0.699716714	1.059	14176.33	7	2	0	0.047929936	253.5971032	TRUE	0.220931589	0.380634373	0.997366456	0.887747142	0.375908186	0.494768252	0.691434048	0.933457126	0.593453851	1.348797228	0.594300332	0.832091004	0.125490836	0.627383638	0.197018496	0.291189528	0.78631048
KE1948	C57BL/6NRj_M1001	INBRED	Final	C57BL/6NRj	FALSE	TRUE	C57BL/6NRj_M1001	TRUE	XY	0.635160681	0.698960302	1.058	13192.2	7	2	0	0.035231715	150.3379611	TRUE	0.212473971	0.366807543	0.975197158	0.894619266	0.422598069	0.509164346	0.684949982	0.921150086	0.594517785	1.26824902	0.642879681	0.78061254	0.141901988	0.584739283	0.203605096	0.27387387	0.665544582
GQ7402	C57BL/6-Ppt1tm1Abm/Mmmh_M_A0233	UNCLASSIFIED	Final	0	FALSE	FALSE		TRUE	XY	0.622128458	0.716361932	1.0665	9506.5	115	3	0	0.015021964	53.76902506	FALSE	0.263398813	0.438331811	1.057697711	0.839005166	0.461579071	0.500920587	0.740020229	0.801557092	0.584337224	1.385263169	0.733708755	0.756324868	0.156419343	0.740020229	0.195445286	0.301267652	0.724346737
BA7572	C57BL/6-Tg(Dmp1-SOST)1Btm/Mmnc_M_40457	UNCLASSIFIED	Final	0	FALSE	FALSE		TRUE	XY	0.63250715	0.691611058	1.049	6110.78	10	6	0	0.035073578	126.7995432	FALSE	0.278687842	0.361001397	0.963052231	0.691728425	0.346273326	0.476698581	0.723311956	0.596650541	0.522519248	1.202792506	0.513682405	0.704656399	0.122897574	0.476207645	0.220921073	0.329581511	0.659326668
PW2130	C57BL/6-Tg(Dmp1-SOST)1Btm/Mmnc_M_40458	UNCLASSIFIED	Final	0	FALSE	FALSE		TRUE	XY	0.656026679	0.708432587	1.0495	4799.31	13	3	0	0.025037338	49.15326104	FALSE	0.330255476	0.491945223	1.209547657	1.006602021	0.555704324	0.630089942	0.917005898	0.711768268	0.698641394	1.507298493	0.515281887	0.932633129	0.166065372	0.651134613	0.285040688	0.448814066	0.895752865
DV6305	C57BLKS/J	INBRED	Final	C57BLKS/J	FALSE	TRUE	C57BLKS/J_MjaxDNA	TRUE	XY	0.669499528	0.714825307	1.059	8504.94	3	13	0	0.021827367	80.0723662	TRUE	0.381425548	0.519345452	1.378611143	0.971435843	0.521226712	0.6088229	1.170849447	0.877843138	0.735220083	1.651276324	0.681839319	0.941453256	0.177073636	0.727107148	0.284070322	0.507705153	0.978137834
WU8495	C57BR/cdJ	INBRED	Final	C57BR/cdJ	FALSE	TRUE	C57BR/cdJ_F001	TRUE	XX	0.75	0.066602317	1.036	7461.62	19	144	0	0.118296727	2709.297073	FALSE	0.346975767	0.572396099	1.500479215	1.191162849	0.55323135	0.755600376	1.178162985	1.270234191	2.946412606	10.54423037	0.846599428	1.113163662	0.184678489	0.815775007	0.306501962	0.441995396	1.004742111
QQ6539	C57L/J	INBRED	Final	C57L/J	FALSE	FALSE		TRUE	XX	0.926315789	0.049760766	1.045	10448.44	4	12	0	0.033152866	118.0130659	TRUE	0.348090096	0.512037947	1.224201379	1.126674899	0.502849976	0.691777622	0.976891836	0.762792979	0.63511847	1.706091297	0.60841593	0.914203078	0.225009572	0.784614409	0.305500024	0.401399467	0.859840918
RM1798	C58/J	INBRED	Final	C58/J	FALSE	TRUE	C58/J_MjaxDNA	TRUE	XY	0.679146919	0.727962085	1.055	10508.38	5	12	1	0.016395783	39.87084138	TRUE	0.319459214	0.542138559	1.197044222	1.118249992	0.424803673	0.634540971	0.958092155	0.842470188	0.650147557	1.551142445	0.67279614	0.928687062	0.164725618	0.706959339	0.268737808	0.395588904	0.849131536
UA7898	CAST/EiJ_7601	INBRED	Final	CAST/EiJ	FALSE	FALSE		TRUE	XY	0.622748815	0.703791469	1.055	12089.26	13	105	2	0.023958928	162.6700977	TRUE	0.195297366	0.327480843	1.045639135	0.928923937	0.317637392	0.416320051	0.56471627	0.717661984	0.508633418	1.241267373	0.640072433	0.728663487	0.124738851	0.616745937	0.142026928	0.24054415	0.665384163
QG4701	CAST/EiJ_7602	INBRED	Final	CAST/EiJ	FALSE	FALSE		TRUE	XY	0.502798507	0.581156716	1.072	11129.73	25	158	4	0.092088733	2148.313417	TRUE	0.162088418	0.390036488	1.122758799	1.289070142	0.531998628	0.579618839	0.657877715	1.034975881	0.578630495	1.547297478	0.660932597	0.694266745	0.097037412	0.771716976	0.151396333	0.25750854	0.760665493
NZ6670	CB;B6-Tg(Ckm-rtTA)102Paa/Mmmh_M_264AA	UNCLASSIFIED	Final	0	FALSE	FALSE		TRUE	XY	0.552826691	0.641797961	1.079	10611.32	627	10	0	0.065962003	709.5840076	FALSE	0.204404435	0.371019024	1.039644874	1.017781421	0.450462518	0.556198699	0.679369099	0.977352881	0.655243909	1.496704123	0.736477945	0.849093575	0.126468765	0.66862585	0.200446397	0.294214222	21.92744105
PQ6269	CBA/CaHN-Btk<xid>/J	INBRED	Final	CBA/CaHN-Btk<xid>/J	FALSE	TRUE	CBA/CaHN-Btk<xid>/J	TRUE	XY	0.670443815	0.713408876	1.059	9372.6	3	8	0	0.02221063	66.53648147	TRUE	0.341740965	0.535710704	1.299426541	0.995668649	0.533150047	0.623093111	1.044534513	0.873930766	0.772464747	1.77752247	0.617438327	0.937413711	0.187994874	0.669611706	0.259906647	0.450462177	0.891855362
II5070	CBA/J	INBRED	Final	CBA/J	FALSE	TRUE	CBA/J	TRUE	XY	0.603204524	0.660697455	1.061	9492.41	5	22	0	0.041984406	206.4537153	TRUE	0.3367954	0.501347923	1.416710836	1.078440574	0.488811591	0.64841279	1.067589799	0.965824282	0.774302844	1.773943618	0.615649772	0.903880055	0.178774412	0.756393799	0.285701947	0.473220187	0.962558515
SP5556	CBA;B6J-Tg(Thy1-KCNB1*/HA)54Sesf/Mmmh_M_351SR	UNCLASSIFIED	Final	0	FALSE	FALSE		TRUE	XY	0.617592593	0.714814815	1.08	9532.49	919	7	0	0.033028772	156.2509308	FALSE	0.199633104	0.330344007	2.950331804	0.944978982	0.442486828	0.489484006	0.657540881	2.855812925	0.625020512	2.259641127	0.672961831	0.72258162	0.133543322	0.487805536	0.191240751	0.276318233	0.713140222
HY9780	CBA;B6J-Tg(Thy1-KCNB1/HA)18Sesf/Mmmh_M_399SR	UNCLASSIFIED	Final	0	FALSE	FALSE		TRUE	XY	0.639044944	0.72659176	1.068	8170.55	584	4	0	0.008842521	39.24520673	FALSE	0.197049277	0.407806329	0.987938982	0.965541456	0.428612775	0.497396435	0.716476066	1.322800362	0.697995047	1.298322191	0.498865125	0.751602241	0.16033202	0.62113359	0.181995202	0.260325349	0.690284423
PL3811	CC017/Unc_F_2517	CC	Final	0	FALSE	FALSE		TRUE	XX	0.869544592	0.04459203	1.054	11993.19	54	38	10	0.030103229	92.74407721	FALSE	0.177267206	0.326518523	1.044842599	0.942034289	0.432662058	0.528799917	0.692559462	0.778941789	0.509038709	1.207017912	0.56398654	0.698479487	0.133742521	0.574992783	0.16434321	0.286829346	0.649951964
KD0559	CC017/Unc_F_2520	CC	Final	0	FALSE	FALSE		TRUE	XX	0.871306006	0.038608198	1.049	11975.25	29	33	10	0.03160224	86.57212712	FALSE	0.231811457	0.374522473	0.976347102	0.843907271	0.354397631	0.505793226	0.631886634	0.77025536	0.526085079	1.194046118	0.599820496	0.615853565	0.121918129	0.57184613	0.206926798	0.250015671	0.679401302
RK2299	CC017/Unc_F_2521	CC	Final	0	FALSE	FALSE		TRUE	XX	0.873929591	0.035204567	1.051	12806.55	39	33	10	0.029694707	83.05851318	FALSE	0.176628412	0.333657472	0.900867367	1.039234098	0.426110186	0.49326334	0.7172113	0.786082325	0.453205703	1.241083984	0.694644717	0.700032586	0.114082276	0.623196884	0.154139914	0.221527322	0.61187455
EB5792	CC017/Unc_F_2524	CC	Final	0	FALSE	FALSE		TRUE	XX	0.859181732	0.042340628	1.051	12831.05	28	35	10	0.030311882	93.81947622	FALSE	0.205439082	0.335280323	0.944817143	0.934841346	0.414697024	0.48772298	0.628631121	0.707346399	0.477045759	1.143086121	0.585220814	0.685680213	0.121502097	0.515468167	0.152286785	0.27612696	0.679367404
UG5923	CC017/Unc_F_2531	CC	Final	0	FALSE	FALSE		TRUE	XX	0.89138756	0.037799043	1.045	11625.51	15	34	2	0.043320887	136.578916	FALSE	0.230269483	0.338307761	0.945420951	0.879101275	0.349232014	0.457184274	0.714033238	0.698894116	0.52272979	1.261708171	0.64513303	0.647455509	0.135908025	0.548277058	0.201711594	0.26725711	0.674121007
LZ1347	CC017/Unc_F_2532	CC	Final	0	FALSE	FALSE		TRUE	XX	0.862987631	0.037107517	1.051	11427.2	32	42	10	0.036012519	113.4526247	FALSE	0.179396552	0.350829648	0.943275822	0.933212113	0.417337638	0.517099623	0.633051053	0.775080616	0.51666207	1.170365604	0.604260094	0.774468042	0.119626872	0.607322962	0.153055888	0.253517957	0.625262617
BH4896	CC017/Unc_F_2533	CC	Final	0	FALSE	FALSE		TRUE	XX	0.874881066	0.038058991	1.051	12818.05	76	34	2	0.029345486	95.07636844	FALSE	0.174519588	0.323918341	0.92705242	0.943825648	0.359805248	0.42393359	0.601339734	0.755029313	0.500856395	1.185984254	0.526211274	0.686298085	0.120611213	0.518799848	0.177874234	0.220860507	0.665468076
KV2433	CC017/Unc_M_2515	CC	Final	0	FALSE	FALSE		TRUE	XY	0.65625	0.698390152	1.056	12823.64	32	34	2	0.027121678	87.0844821	FALSE	0.20337446	0.318942309	0.934914264	0.880483523	0.366432741	0.514830592	0.565206321	0.715631679	0.539706533	1.176421435	0.533390071	0.635779131	0.113384381	0.50375729	0.160328945	0.23207147	0.596086799
KB3626	CC017/Unc_M_2516	CC	Final	0	FALSE	FALSE		TRUE	XY	0.65108593	0.692162417	1.059	11708.76	80	39	2	0.018850209	66.36486759	FALSE	0.195921619	0.347688278	0.9838784	0.912905922	0.367246278	0.535496317	0.672743937	0.6498551	0.475199602	1.211144062	0.592889223	0.74978025	0.132550284	0.554029443	0.137930869	0.244090666	0.665740636
FW3592	CC017/Unc_M_2519	CC	Final	0	FALSE	FALSE		TRUE	XY	0.636792453	0.65	1.06	11250.94	11	36	2	0.01847573	69.54495946	FALSE	0.219626151	0.306730007	0.895036562	0.914590489	0.392500641	0.567952694	0.619059548	0.815487632	0.500669409	1.250740268	0.639057883	0.678076855	0.149765304	0.597372466	0.219092862	0.264866828	0.643946364
UU9787	CC026/GeniUnc_F_3250	CC	Final	0	FALSE	FALSE		TRUE	XX	0.851466414	0.033112583	1.057	14511.92	15	25	1	0.02790358	70.82722401	FALSE	0.228984246	0.369834021	1.098201004	1.069810541	0.472301542	0.551202223	0.669725517	0.783631914	0.599851901	1.371700394	0.747937108	0.806992028	0.161660259	0.668967519	0.195081072	0.260199974	0.78948917
UU2383	CC026/GeniUnc_F_3252	CC	Final	0	FALSE	FALSE		TRUE	XX	0.838694418	0.034058657	1.057	14749.41	21	24	1	0.03236767	87.50072992	FALSE	0.177363025	0.380354194	1.027634317	1.007904715	0.396829429	0.580972387	0.649720899	0.859288602	0.617719619	1.276118831	0.724978146	0.782946566	0.134446055	0.595142445	0.215534043	0.278451814	0.763149164
JZ1590	CC026/GeniUnc_F_3286	CC	Final	0	FALSE	FALSE		TRUE	XX	0.863033175	0.036018957	1.055	12639.04	15	22	2	0.031730727	78.2334488	FALSE	0.250731156	0.402799722	1.053165801	0.99406319	0.458500174	0.559219884	0.703930293	0.792702889	0.569189	1.44085361	0.714295008	0.869923971	0.159505841	0.695464457	0.257456353	0.300022892	0.828306872
CV7175	CC026/GeniUnc_F_3536	CC	Final	0	FALSE	FALSE		TRUE	XX	0.845825427	0.032258065	1.054	13038.18	15	22	1	0.033401054	94.76006665	FALSE	0.196269721	0.358408912	0.994310536	0.985950474	0.326425921	0.493780564	0.663052652	0.880337576	0.576767605	1.360696021	0.655843057	0.716664428	0.141200686	0.621789225	0.201178381	0.227715827	0.777332404
EG2791	CC026/GeniUnc_F_3537	CC	Final	0	FALSE	FALSE		TRUE	XX	0.84	0.034285714	1.05	14603.85	15	23	1	0.036573688	87.65067687	FALSE	0.155712402	0.310397678	1.022059507	0.982754793	0.405304182	0.500963912	0.639009736	0.840600462	0.556223327	1.16626809	0.706389245	0.717002887	0.127637607	0.596555167	0.169270474	0.20686331	0.772810103
JM2898	CC026/GeniUnc_F_3568	CC	Final	0	FALSE	FALSE		TRUE	XX	0.84047619	0.035714286	1.05	14385.84	19	22	1	0.036876785	102.6087597	FALSE	0.182262554	0.327335762	1.096008272	0.993268358	0.35514088	0.501882395	0.497086012	0.71771963	0.620193176	1.333950576	0.645426321	0.75574313	0.122133985	0.633678658	0.191785807	0.268180371	0.792932477
FT7501	CC026/GeniUnc_F_3569	CC	Final	0	FALSE	FALSE		TRUE	XX	0.845605701	0.038004751	1.0525	13025.21	19	20	1	0.038224248	113.0585452	FALSE	0.203374785	0.378112804	1.060481658	0.914994599	0.474925037	0.540259858	0.652887571	0.793461082	0.606439196	1.380322864	0.679067564	0.754920447	0.13281932	0.61258113	0.202299947	0.290513472	0.781330763
HQ2170	CC026/GeniUnc_F_40403	CC	Final	0	FALSE	FALSE		TRUE	XX	0.846372688	0.034139403	1.0545	13049.7	11	24	1	0.028550406	75.85040646	FALSE	0.187513941	0.406676127	0.955347894	0.982628222	0.443075441	0.507981166	0.624612231	0.832892938	0.577791219	1.347617556	0.586067273	0.733580283	0.137704353	0.627370916	0.219238817	0.274795664	0.837873897
NJ7695	CC026/GeniUnc_F_40404	CC	Final	0	FALSE	FALSE		TRUE	XX	0.858767773	0.029383886	1.055	14016.48	11	22	1	0.027707006	74.68014098	FALSE	0.174580212	0.308351318	0.900297383	0.876182911	0.43084998	0.533728879	0.598295733	0.667000573	0.53515577	1.179682797	0.608997421	0.712661111	0.120072945	0.608141286	0.179645678	0.2340816	0.723148765
HK9691	CC026/GeniUnc_F_40405	CC	Final	0	FALSE	FALSE		TRUE	XX	0.858695652	0.032136106	1.058	13090.91	15	22	2	0.040890622	125.4442681	FALSE	0.243604194	0.374076431	1.188229301	0.967770943	0.44618755	0.529222282	0.728444527	0.775194532	0.542361172	1.331611262	0.627458404	0.795513979	0.130854181	0.670236187	0.233138915	0.283173643	0.803534813
HZ3408	CC026/GeniUnc_F_40406	CC	Final	0	FALSE	FALSE		TRUE	XX	0.860189573	0.036492891	1.055	14300.29	15	23	1	0.035837909	98.27668064	FALSE	0.226708635	0.296567341	1.012216992	0.771452701	0.411460088	0.510898607	0.60040726	0.752012541	0.614113273	1.275078731	0.49950024	0.708027429	0.153003853	0.55327536	0.165800794	0.226638706	0.748096537
NU4507	CC029/Unc_F_1414	CC	Final	0	FALSE	FALSE		TRUE	XX	0.84351145	0.03721374	1.048	12766.62	126	24	1	0.033013398	93.12253453	FALSE	0.173734371	0.33994913	0.95240587	0.974103084	0.417573459	0.483056748	0.60681703	0.782822951	0.418043435	1.216532244	0.528801055	0.686947897	0.09963486	0.568435677	0.163786551	0.251985335	0.666268963
DR0606	CC029/Unc_F_1420	CC	Final	0	FALSE	FALSE		TRUE	XX	0.833965844	0.032732448	1.054	13380.32	197	23	1	0.024615638	76.19510245	FALSE	0.170548937	0.293864339	0.903640317	0.941158093	0.350514687	0.426297607	0.645350602	0.779577549	0.490496353	1.156175312	0.518896263	0.747216598	0.094691281	0.601928634	0.162626857	0.265613902	0.560300344
WN6310	CC029/Unc_F_1438	CC	Final	0	FALSE	FALSE		TRUE	XX	0.852997146	0.038058991	1.051	11264.26	145	20	1	0.026956951	66.16171758	FALSE	0.179328303	0.325986896	0.963223806	0.956299248	0.451694261	0.487471145	0.673191348	0.713584604	0.505581528	1.300218974	0.58343842	0.693698693	0.111148037	0.631377669	0.174179273	0.283463006	0.67141582
NY1379	CC029/Unc_F_1439	CC	Final	0	FALSE	FALSE		TRUE	XX	0.835636017	0.041924726	1.0495	11015.62	98	26	1	0.027586207	77.65637855	FALSE	0.168397258	0.403608738	1.021912632	1.056590666	0.434383223	0.584079761	0.760556457	0.877118224	0.568737909	1.372868858	0.604505305	0.824465712	0.136896531	0.667597539	0.172028466	0.252822837	0.67286279
ZD1856	CC029/Unc_F_1440	CC	Final	0	FALSE	FALSE		TRUE	XX	0.869502868	0.03585086	1.046	13014.36	96	21	1	0.032105205	77.90661015	FALSE	0.216145907	0.357067199	1.047074396	1.126755628	0.424684831	0.564146196	0.638679268	1.003122936	0.610633318	1.461616582	0.687471536	0.867503481	0.119252914	0.724123366	0.206387453	0.328022353	0.692542859
RS0847	CC031/GeniUnc_F_1270	CC	Final	0	FALSE	FALSE		TRUE	XX	0.839336493	0.023222749	1.055	17074.87	102	29	0	0.048011201	196.7431534	FALSE	0.246502553	0.464015141	1.357198898	1.313743233	0.560941186	0.577573813	0.787180046	1.159540044	0.74413434	1.756206238	0.931837044	1.004926896	0.164920691	0.774237051	0.225067548	0.281641905	0.864603751
CT3404	CC031/GeniUnc_F_1272	CC	Final	0	FALSE	FALSE		TRUE	XX	0.826850095	0.031783681	1.054	17249.71	54	37	0	0.021068526	52.0535805	FALSE	0.204235351	0.387021063	1.216310503	1.290978437	0.510559392	0.602387038	0.655025612	1.09207651	0.727084807	1.82855278	0.811839868	0.957929305	0.175887044	0.766389822	0.201974443	0.305338517	0.75560703
TP1814	CC031/GeniUnc_F_1282	CC	Final	0	FALSE	FALSE		TRUE	XX	0.857959962	0.029551954	1.049	15644.92	68	31	0	0.048015594	183.20766	FALSE	0.249473959	0.535061879	1.334682486	1.403522725	0.499970615	0.599044311	0.816495095	1.084377586	0.83477579	1.759996277	0.851778114	0.908345999	0.206840311	0.806332051	0.230617998	0.300417015	0.859064825
KP9719	CC031/GeniUnc_F_1288	CC	Final	0	FALSE	FALSE		TRUE	XX	0.790018832	0.034839925	1.062	14779.52	7	47	0	0.045086756	274.9742277	FALSE	0.263066652	0.506511563	1.368176637	1.284209118	0.572075242	0.712675166	0.775126431	1.177778089	0.832367786	2.257176827	0.83663044	1.047733308	0.182549853	0.873844086	0.207381504	0.324029371	0.834126976
TJ1489	CC031/GeniUnc_F_1294	CC	Final	0	FALSE	FALSE		TRUE	XX	0.812826603	0.033254157	1.0525	15583.16	38	33	0	0.026787832	66.89992182	FALSE	0.258933365	0.460817967	1.228313146	1.304677633	0.508305127	0.672777547	0.919839122	1.225617929	0.733355761	1.889539762	0.656927103	1.086750072	0.182248019	0.848415867	0.24269789	0.348196391	0.857592439
GB8445	CC031/GeniUnc_F_1302	CC	Final	0	FALSE	FALSE		TRUE	XX	0.756846081	0.033050047	1.059	14489.23	61	37	0	0.047555458	260.4638812	FALSE	0.297324363	0.46075614	1.280261592	1.165762725	0.526667181	0.63702504	0.793555137	1.103095473	0.671809506	1.812864218	0.787067558	1.000467496	0.194006218	0.80211322	0.220370634	0.31333626	0.909296306
UC6931	CC031/GeniUnc_M_1191	CC	Final	0	FALSE	FALSE		TRUE	XY	0.659754948	0.723845429	1.061	17371.22	111	32	1	0.052613661	321.7047901	FALSE	0.231877792	0.430539723	1.202678954	1.050185341	0.644399206	0.579924745	0.77542052	0.897691729	0.656027635	1.564944829	0.83793772	1.045752722	0.158365394	0.618609422	0.229978098	0.278736909	0.732936456
MB3268	CC031/GeniUnc_M_1218	CC	Final	0	FALSE	FALSE		TRUE	XY	0.518656716	0.628264925	1.072	15062.89	115	53	0	0.050561168	462.658836	FALSE	0.279162814	0.455622923	1.396079622	1.216034545	0.539936068	0.595503077	0.783050033	0.999542289	0.768510995	1.894655777	0.810070072	1.079009087	0.177455934	0.861720172	0.254931083	0.3575674	0.852624974
CR0631	CC031/GeniUnc_M_1230	CC	Final	0	FALSE	FALSE		TRUE	XY	0.603755869	0.697652582	1.065	14877.49	114	31	1	0.015251483	38.23750694	FALSE	0.23807779	0.464056765	1.195698985	1.117728845	0.499344975	0.732112729	0.861301186	1.027458243	0.678340219	1.725492644	0.670610421	0.940346776	0.169988349	0.813981377	0.245673157	0.299512883	0.823458781
EY5858	CC037/TauUnc.M001t_p02	CELL LINE	Final	0	FALSE	TRUE	CC037/TauUnc.M001t_p02	TRUE	XY	0.68241966	0.669659735	1.058	11104.75	3	22	1	0.015061498	51.05178209	FALSE	0.311578462	0.571647421	1.321056657	1.108084674	0.554087363	0.739053305	22.4510292	0.886197584	0.801639152	1.866409017	0.650712707	1.019563972	0.178392177	0.790923014	0.313469545	0.40730329	0.950224257
KH5880	CC037/TauUnc.M003t_p02	CELL LINE	Final	0	FALSE	TRUE	CC037/TauUnc.M003t_p02	TRUE	XY	0.68655303	0.606534091	1.056	10887.98	3	19	1	0.018659126	52.22722149	FALSE	0.390706009	0.541698176	1.28178022	1.040045802	0.527003074	0.692322965	18.97936638	1.013778309	0.779391441	1.729797125	0.684975414	1.095611654	0.237325888	0.793627321	0.337436266	0.49109192	0.989072169
MR6159	CC037/Unc_F_2393	CC	Final	0	FALSE	FALSE		TRUE	XX	0.812803104	0.034917556	1.031	12821.73	4	25	0	0.074221392	724.5639351	FALSE	0.210813917	0.24825035	0.687660489	0.49104122	0.27585972	0.367656975	0.665744577	0.463041888	0.48254003	0.940668386	0.353228349	0.636029408	0.104822014	0.431220919	0.198881053	0.27281801	0.540566502
SK7447	CC037/Unc_F_2394	CC	Final	0	FALSE	FALSE		TRUE	XX	0.792919496	0.035887488	1.031	11934.71	7	54	0	0.093059521	1347.948991	FALSE	0.265611707	0.284380484	0.725781895	0.621548153	0.286642792	0.443244773	0.67198924	0.506505606	0.534239825	1.149168632	0.454640102	0.80412478	0.122164627	0.549657034	0.199418253	0.287732051	0.64844448
IM7809	CC037/Unc_F_2398	CC	Final	0	FALSE	FALSE		TRUE	XX	0.811057692	0.032692308	1.04	13334.93	3	28	0	0.072935427	749.43251	FALSE	0.2190488	0.247470401	0.597228567	0.571581635	0.29981414	0.395202731	0.555383572	0.432323291	0.457820241	0.988681746	0.426024044	0.711289924	0.146532474	0.423174385	0.206300325	0.262543598	0.549984218
LR8140	CC037/Unc_F_2399	CC	Final	0	FALSE	FALSE		TRUE	XX	0.842836608	0.030186871	1.0435	14455.77	3	19	0	0.045435976	250.0791276	FALSE	0.138076329	0.222817562	0.727667786	0.670320453	0.276360187	0.400739565	0.500215397	0.563027675	0.449093951	0.987840668	0.349479766	0.608476646	0.087508294	0.438994179	0.14658504	0.184701301	0.484996563
CM7487	CC037/Unc_F_2404	CC	Final	0	FALSE	FALSE		TRUE	XX	0.798482693	0.036036036	1.0545	11610.21	2	17	0	0.045787393	172.4071388	FALSE	0.228850382	0.346850014	0.929871555	0.94873427	0.44814021	0.523246545	0.663381875	0.866479052	0.658214008	1.390759171	0.647792142	0.814541988	0.123856548	0.69378616	0.187679707	0.248316015	0.702399271
HV4437	CC037/Unc_F_2412	CC	Final	0	FALSE	FALSE		TRUE	XX	0.853193518	0.04099142	1.049	12001.88	2	17	0	0.029591478	89.00754983	FALSE	0.212966694	0.330698282	1.055918198	0.874696539	0.381107065	0.519418768	0.681310116	0.911524113	0.553663412	1.27663368	0.520668573	0.780544597	0.147810217	0.626735318	0.180471776	0.270874305	0.621319498
YK3592	CC037/Unc_M_2396	CC	Final	0	FALSE	FALSE		TRUE	XX	0.80294397	0.037511871	1.053	13796.78	4	17	0	0.028776631	86.16106706	FALSE	0.181709047	0.33174404	0.968269311	1.078367453	0.443291796	0.592964386	0.677331889	0.862302567	0.614418665	1.311102894	0.652253576	0.831135877	0.147280728	0.737200925	0.203815653	0.255566853	0.73234472
AC1814	CC037/Unc_M_2397	CC	Final	0	FALSE	FALSE		TRUE	XY	0.620982987	0.654536862	1.058	13525.09	3	16	1	0.021178344	60.66492162	FALSE	0.186098509	0.317927529	0.947941593	0.960362947	0.456928402	0.513268118	0.65493071	0.820326961	0.514451104	1.20745918	0.531752276	0.719329518	0.14587698	0.670753149	0.178778783	0.225432799	0.641917862
CQ1921	Cr_LTWV_2592	CROSS	Final	0	FALSE	FALSE		TRUE	XX*	0.680645161	0.039631336	1.085	9874.17	2542	76	155	0.147643312	4891.416091	FALSE	0.212473449	0.458772508	1.341377896	1.295298097	0.501915353	0.596302986	0.732921996	1.185618047	0.581922038	1.513442905	0.787002464	0.894150656	0.131352747	0.707805973	0.17540706	0.247210528	0.793686566
IF5643	Cr_LTWV_2581	CROSS	Final	0	FALSE	FALSE		TRUE	XX*	0.668478261	0.03442029	1.104	11617.36	2658	39	109	0.136410059	3711.281623	FALSE	0.22991449	0.503556632	1.311054883	1.105930874	0.469383644	0.532392781	0.718579618	0.937562195	0.616921433	1.592530129	0.765664315	0.864137612	0.177062563	0.716944135	0.193417394	0.289394427	0.761962959
FW9743	CC051/TauUnc.F001t_p02	CELL LINE	Final	0	FALSE	TRUE	CC051/TauUnc.F001t_p02	TRUE	XX	0.888254874	0.055159296	1.0515	10046.19	46	9	6	0.02177136	58.61872295	FALSE	0.397464062	0.563397593	1.359022498	1.079513586	0.5475707	0.709821243	19.05508209	1.013418886	0.757799625	1.882703547	0.66592401	1.068464623	0.17021376	0.779499391	0.303000402	0.539806563	1.055126234
JH4399	CC051/TauUnc.M002t_p02	CELL LINE	Final	0	FALSE	TRUE	CC051/TauUnc.M002t_p02	TRUE	XY	0.71333964	0.774834437	1.057	10229.77	35	6	1	0.028665715	98.42661977	FALSE	0.274786163	0.540481215	1.185168068	1.004127878	0.522787762	0.734815933	16.94583099	0.875386015	0.859452132	1.802777096	0.764533113	0.91302126	0.159925351	0.791219923	0.296292017	0.510177511	1.09582102
QK4421	CC061-F005T_p2	UNCLASSIFIED	Final	0	FALSE	TRUE	CC061/GeniUnc-F005T_p2	TRUE	XX	0.872682927	0.070243902	1.025	8852.91	39	79	0	0.078860092	695.2713944	FALSE	0.438499962	0.69005571	1.369041611	0.987020264	0.537789366	0.782680637	15.77165305	0.760766935	0.829106058	1.810591418	0.633577095	0.928169548	0.193043904	0.766301839	0.36722395	0.514972005	1.180064168
JI6667	Cr_LTWV_2926	CROSS	Final	0	FALSE	FALSE		TRUE	XX*	0.640310786	0.033820841	1.094	10181.77	2451	58	48	0.117414891	3630.692952	FALSE	0.224027856	0.465537939	1.244184516	1.113755322	0.45915398	0.597440355	0.775503705	0.884816728	0.628476217	1.48716782	0.622485117	0.807325286	0.149384642	0.704887297	0.199081308	0.322930114	0.754092889
TP5420	Cr_B2930_001_M	CROSS	Final	0	FALSE	FALSE		TRUE	XY	0.602232143	0.639732143	1.12	17622.34	2649	19	0	0.058173732	227.3465302	FALSE	0.230275875	0.44994022	1.226965246	1.106152694	0.503168108	0.627158445	0.727201907	0.963265889	0.687933571	1.515349178	0.761249596	0.974671865	0.163201926	0.788544494	0.217905214	0.234645328	0.72862056
AV2535	Cr_B2930_002_M	CROSS	Final	0	FALSE	FALSE		TRUE	XXY	0.851752022	0.65408805	1.113	15308.49	2776	13	142	0.049914342	171.7208189	FALSE	0.234575673	0.390175577	1.179410689	1.209002106	0.483914394	0.665186322	0.734624902	1.002450093	0.729790984	1.439201124	0.779632599	0.847568745	0.120913275	0.762256623	0.220727151	0.254956517	0.815233752
CB8852	Cr_B2930_003_M	CROSS	Final	0	FALSE	FALSE		TRUE	XY	0.617201426	0.64483066	1.122	14420.73	2794	15	0	0.059718867	276.7569226	FALSE	0.208311227	0.435345501	1.134408578	0.877902842	0.436940427	0.563147629	0.729574708	0.732071114	0.588735792	1.508869506	0.595184842	0.858555694	0.134251177	0.676664766	0.201654144	0.351161137	0.744067733
LL8922	Cr_B2930_004_M	CROSS	Final	0	FALSE	FALSE		TRUE	XY	0.616755793	0.663101604	1.122	15624.11	2585	17	0	0.061095981	245.1876989	FALSE	0.238285587	0.396630616	1.11871979	1.101630815	0.467354649	0.624035583	0.76253948	0.906291677	0.669606181	1.541399891	0.690855393	0.891762849	0.193035007	0.732265754	0.234317361	0.331666912	0.735337929
SN3221	Cr_B2930_005_M	CROSS	Final	0	FALSE	FALSE		TRUE	XY	0.569320215	0.634615385	1.118	15782.03	2727	11	0	0.066435317	311.1041482	FALSE	0.242871116	0.38328395	1.211757689	0.994421939	0.474907126	0.580280115	0.741032533	0.85331211	0.670952843	1.453995173	0.634075465	0.785386768	0.129831181	0.739511817	0.204029479	0.299771263	0.759091043
EI0712	Cr_B2930_006_M	CROSS	Final	0	FALSE	FALSE		TRUE	XY	0.566248881	0.613249776	1.117	12682.24	2734	12	0	0.077297386	501.0718111	FALSE	0.250586693	0.383055429	1.000848612	0.964971663	0.447633938	0.706184525	0.762168336	0.766741661	0.623233864	1.470560673	0.618423987	0.774942107	0.139644126	0.625205125	0.224566048	0.298133507	0.744032735
JG3362	Cr_B2930_007_M	CROSS	Final	0	FALSE	FALSE		TRUE	XY	0.59929078	0.647163121	1.128	12354.18	2825	13	0	0.068309906	325.0174185	FALSE	0.201794062	0.369267755	1.043938237	0.876464544	0.374610077	0.561915115	0.721941935	0.69871093	0.600849308	1.293408474	0.565881384	0.852666929	0.132586713	0.583851012	0.194994744	0.333976054	0.685678902
GA9987	Cr_B2930_008_F	CROSS	Final	0	FALSE	FALSE		TRUE	XX	0.847159603	0.027051398	1.109	13992.89	2819	16	142	0.048190204	180.3861092	FALSE	0.26070378	0.353893946	1.185030173	0.978067962	0.463449564	0.447012648	0.681846151	0.762815829	0.641968764	1.558434024	0.593658524	1.00822613	0.15214867	0.726082895	0.264848741	0.297865502	0.785613116
SL5772	Cr_B2930_009_F	CROSS	Final	0	FALSE	FALSE		TRUE	XX	0.82265343	0.028880866	1.108	14702.49	2668	15	142	0.056732923	260.4695195	FALSE	0.277708053	0.393742816	1.160143586	1.124367334	0.506036717	0.629689237	0.759191106	0.929910483	0.634450335	1.396838179	0.638395245	0.83910954	0.147526027	0.663425018	0.20615555	0.340962643	0.70362229
AP6164	Cr_B2930_010_M	CROSS	Final	0	FALSE	FALSE		TRUE	XY	0.49911426	0.548715678	1.129	9948.86	2684	108	0	0.132183176	2541.11512	FALSE	0.288475274	0.471712355	1.127365391	1.096105526	0.465681513	0.609014524	0.772651369	1.706527247	0.639369762	1.491929787	0.674951729	0.896183115	0.153183386	0.764710761	0.190574606	0.377329679	0.720685614
HV4600	Cr_B2930_011_M	CROSS	Final	0	FALSE	FALSE		TRUE	XY	0.599821747	0.64973262	1.122	11729.91	2630	12	0	0.066534153	305.8090583	FALSE	0.279115576	0.397530828	1.101628427	0.992335156	0.396507802	0.518674149	0.756783435	0.713049076	0.596935633	1.406831164	0.565648089	0.845957195	0.15345389	0.702989321	0.232653148	0.290965626	0.698300452
UW0930	Cr_B2930_012_M	CROSS	Final	0	FALSE	FALSE		TRUE	XY	0.528888889	0.604	1.125	12646.02	2613	15	0	0.093756864	811.2111203	FALSE	0.234065822	0.390636878	1.087852536	0.905344457	0.415704062	0.59014636	0.70251377	0.844218484	0.61616246	1.505533506	0.6140274	0.924639072	0.133638932	0.680846866	0.194211371	0.329748134	0.67586506
XD2584	Cr_B2930_013_M	CROSS	Final	0	FALSE	FALSE		TRUE	XY	0.574270557	0.623342175	1.131	14541.04	2555	16	0	0.084649682	579.2816786	FALSE	0.218553807	0.398664702	1.137607641	1.04607362	0.500651894	0.618043759	0.805650678	0.842580632	0.679799996	1.457529702	0.608897234	0.963135957	0.113609468	0.675604973	0.211745492	0.290625673	0.757235989
MX4770	Cr_B2930_014_F	CROSS	Final	0	FALSE	FALSE		TRUE	XX	0.811534968	0.030881017	1.101	11455.96	2820	19	142	0.059130244	289.0272693	FALSE	0.200681529	0.478091664	1.151365537	0.995202311	0.490836119	0.591918856	0.7611757	0.876050381	0.631112421	1.434711445	0.655204679	0.909220882	0.186540421	0.738480094	0.247993138	0.351170853	0.747209173
ZB6572	Cr_B2930_015_F	CROSS	Final	0	FALSE	FALSE		TRUE	XX	0.834084761	0.031559964	1.109	13555.73	2860	12	142	0.046464968	158.4376509	FALSE	0.205448185	0.381683631	1.177214414	0.982684121	0.447190987	0.584771191	0.673663494	0.790588224	0.618410104	1.500546334	0.582631874	0.858603745	0.167161791	0.595025158	0.210538284	0.310053402	0.718810456
KM1694	Cr_B2930_016_F	CROSS	Final	0	FALSE	FALSE		TRUE	XX	0.866576819	0.026954178	1.113	16083.19	2863	14	142	0.054537667	210.6096757	FALSE	0.258282112	0.428832867	1.086538255	1.086600432	0.509538255	0.563880712	0.708379419	0.872712501	0.675736639	1.546272954	0.625746552	0.987739441	0.170861638	0.756815087	0.239629095	0.283898923	0.822225001
RS8660	Cr_B2930_018_M	CROSS	Final	0	FALSE	FALSE		TRUE	XY	0.628815081	0.675044883	1.114	12440.97	2639	14	1	0.05357237	186.9006953	FALSE	0.265172291	0.421590987	1.164057324	0.95756214	0.451572576	0.581305246	0.730972056	0.798490917	0.584038152	1.38228793	0.675831652	0.772126409	0.142593405	0.651315875	0.23744133	0.33904114	0.773251724
NH6899	Cr_B2930_019_M	CROSS	Final	0	FALSE	FALSE		TRUE	XY	0.570598749	0.637622878	1.119	11705.2	2685	18	1	0.075971887	524.9969386	FALSE	0.227847397	0.404008376	1.097375258	0.982212794	0.393243932	0.608191083	0.718911078	0.82706811	0.619638984	1.241755498	0.56359553	0.767692804	0.146857771	0.605371824	0.179151103	0.354628626	0.723524411
XJ3897	Cr_B2930_020_M	CROSS	Final	0	FALSE	FALSE		TRUE	XY	0.628737171	0.689424364	1.1205	14785.39	2448	15	1	0.056757083	204.9073619	FALSE	0.224613617	0.361640774	1.127802487	0.991519308	0.440502405	0.498600296	0.675328806	0.842723778	0.587945249	1.344164716	0.702044367	0.758045594	0.141558657	0.668633007	0.211289653	0.276353881	0.754258071
FK4752	Cr_B2930_021_M	CROSS	Final	0	FALSE	FALSE		TRUE	XY	0.574600355	0.630994671	1.126	16174.68	2561	14	1	0.081032286	461.093764	FALSE	0.288846549	0.423439644	1.136220438	1.023080629	0.457257937	0.630553501	0.833957856	0.825673302	0.730524578	1.589707047	0.717355846	1.053127595	0.169833363	0.740602058	0.248227503	0.282602221	0.83216493
XJ2818	Cr_B2930_022_M	CROSS	Final	0	FALSE	FALSE		TRUE	XY	0.570472792	0.633363069	1.121	12098.47	2771	16	1	0.084226883	587.3665537	FALSE	0.299707431	0.479151676	1.11724913	1.085013637	0.449974422	0.645701724	0.768031287	0.903503014	0.668431879	1.479774445	0.661902126	0.855232429	0.111584399	0.599745482	0.239617166	0.373022514	0.754145229
XT3562	Cr_B2930_023_F	CROSS	Final	0	FALSE	FALSE		TRUE	XX	0.807588076	0.029358627	1.107	12360.73	2790	11	100	0.068217659	427.2447487	FALSE	0.229517281	0.409118396	1.02227013	1.011429342	0.410817325	0.551747569	0.642438042	0.842588114	0.588476806	1.359952587	0.505957375	0.769776851	0.133730019	0.581438384	0.27215232	0.288575305	0.635642324
XB8078	Cr_B2930_024_F	CROSS	Final	0	FALSE	FALSE		TRUE	XX	0.841938406	0.024456522	1.104	14813.12	2745	20	102	0.039581595	130.7000387	FALSE	0.223113021	0.363664098	0.949158571	0.832235196	0.37190004	0.501042312	0.618573256	0.674807189	0.510493393	1.30775959	0.55741126	0.730298536	0.116788359	0.548365225	0.194962301	0.234319303	0.616480517
WK9040	Cr_B2930_025_M	CROSS	Final	0	FALSE	FALSE		TRUE	XY	0.543111111	0.652444444	1.125	15885.67	2461	26	0	0.091977817	799.5004946	FALSE	0.277293972	0.443733304	1.219652826	1.141909794	0.495855758	0.655937159	0.739975173	1.057053433	0.786117393	1.899636817	0.826782979	1.178294792	0.177833251	0.720649577	0.254883834	0.325135837	0.842016836
ZZ0320	Cr_B2930_026_M	CROSS	Final	0	FALSE	FALSE		TRUE	XY	0.588680927	0.662210339	1.122	13339.37	2670	11	0	0.062251263	266.5723268	FALSE	0.281647455	0.418085669	1.239638627	1.077112228	0.477983544	0.567567976	0.754833172	0.975533228	0.667047926	1.657799262	0.690437334	1.094804216	0.173921239	0.712552319	0.241090822	0.304961897	0.75753195
RG9020	Cr_B2930_027_F	CROSS	Final	0	FALSE	FALSE		TRUE	XX	0.833783784	0.027027027	1.11	13108.07	2771	14	141	0.049008346	176.5152459	FALSE	0.222992391	0.434083716	1.135407373	0.993815215	0.47802611	0.519222104	0.810721908	0.923782025	0.637622443	1.386779226	0.757777426	0.892656163	0.170200487	0.661348284	0.211701637	0.324914332	0.819495129
GG0509	Cr_B2930_028_F	CROSS	Final	0	FALSE	FALSE		TRUE	XX	0.849909584	0.027124774	1.106	14987.33	2841	9	142	0.046609928	155.7944014	FALSE	0.251879401	0.332013748	0.97408937	0.973155248	0.466527356	0.507628737	0.732285145	0.752769113	0.632334061	1.460166571	0.617654997	0.944531072	0.180352323	0.656888133	0.2072417	0.219518736	0.725212505
DL2100	Cr_B2930_029_F	CROSS	Final	0	FALSE	FALSE		TRUE	XX	0.850719424	0.023381295	1.112	16992.01	2779	9	142	0.048577861	180.8264392	FALSE	0.245232913	0.431026123	1.348104234	1.203094899	0.460863677	0.640300959	0.789900686	1.088923588	0.74411446	1.701564487	0.610286851	1.035957516	0.182909502	0.810616306	0.248999389	0.302142015	0.800258496
RT0634	Cr_B2930_030_F	CROSS	Final	0	FALSE	FALSE		TRUE	XX	0.811823105	0.032490975	1.108	13598.54	2792	8	142	0.050194377	176.6680394	FALSE	0.251938804	0.454534077	1.186524403	1.016359082	0.44328287	0.580356405	0.725298431	0.86965216	0.70787009	1.418240449	0.763390755	0.901199663	0.191049916	0.613521729	0.24524691	0.328491138	0.761478785
VD0301	Cr_B2930_031_F	CROSS	Final	0	FALSE	FALSE		TRUE	XX	0.857272727	0.025454545	1.1	13260.14	2656	17	142	0.040245992	117.4237745	FALSE	0.243436346	0.437778187	1.175402381	1.029325491	0.450673979	0.568696866	0.756100621	0.853610904	0.600144498	1.402549306	0.67661428	0.839885559	0.158218542	0.681365361	0.205729353	0.328050838	0.712285095
EC6933	Cr_B2930_032_F	CROSS	Final	0	FALSE	FALSE		TRUE	XX	0.840735756	0.026020637	1.1145	15837.4	2807	12	142	0.053065012	204.8934932	FALSE	0.210072363	0.376134977	1.11482947	0.937843346	0.44136033	0.563160628	0.7321909	0.802215021	0.490484556	1.377940843	0.669428072	0.946683181	0.151540028	0.740967593	0.248083654	0.276749975	0.727265849
UA7350	Cr_B2930_033_M	CROSS	Final	0	FALSE	FALSE		TRUE	XY	0.610865724	0.666961131	1.132	17878.8	2578	13	0	0.070081265	319.3413601	FALSE	0.238830281	0.398572502	1.078148127	1.016119373	0.44896737	0.609380776	0.784728067	0.892621185	0.666263773	1.531981594	0.667829873	1.01136514	0.155379513	0.710002715	0.228203173	0.260028566	0.841107675
AQ7697	Cr_B2930_034_M	CROSS	Final	0	FALSE	FALSE		TRUE	XY	0.606382979	0.678191489	1.128	17788.85	2736	15	0	0.07033714	324.1978866	FALSE	0.18770186	0.388501813	1.026260903	1.032107262	0.3738297	0.552256086	0.694817307	0.850757697	0.647934004	1.446243112	0.618589778	0.992588123	0.18421653	0.693693008	0.206871172	0.239307223	0.67795281
AY6532	Cr_B2930_036_M	CROSS	Final	0	FALSE	FALSE		TRUE	XY	0.61704947	0.657685512	1.132	15010.54	2886	17	0	0.072849769	344.7960105	FALSE	0.217713659	0.384463136	1.214879526	0.94367013	0.532292576	0.593582835	0.762397527	0.727222248	0.735483109	1.550443694	0.663666914	0.897102857	0.168015254	0.790178003	0.240431027	0.287464639	0.756335121
MS1182	Cr_B2930_037_M	CROSS	Final	0	FALSE	FALSE		TRUE	XY	0.621561668	0.663708962	1.127	17220.16	2627	16	0	0.070507358	298.6388941	FALSE	0.220671551	0.364804916	1.097086035	0.957424172	0.45005382	0.513351712	0.743546982	0.947610095	0.635127565	1.520833483	0.691921454	0.982859472	0.134203146	0.717472897	0.236118559	0.270322649	0.732455333
MT0407	Cr_B2930_038_F	CROSS	Final	0	FALSE	FALSE		TRUE	XY	0.600353669	0.653404067	1.131	17628.03	2790	11	1	0.068731606	331.229827	FALSE	0.233208084	0.341331317	1.098988133	1.031992573	0.470103477	0.630926858	0.766109262	0.951212152	0.699624253	1.555250021	0.647377927	0.915076528	0.168424909	0.797990299	0.262422913	0.25209845	0.723790306
II2344	Cr_B2930_039_F	CROSS	Final	0	FALSE	FALSE		TRUE	XY	0.614768683	0.666370107	1.124	16343.4	2479	11	1	0.063805183	272.6265366	FALSE	0.214887978	0.41239891	1.180354209	1.046844651	0.496714295	0.587821413	0.739197511	0.905809118	0.682354991	1.436665638	0.655738741	0.809684684	0.146725903	0.747457727	0.225167357	0.278338671	0.737300721
SS3453	Cr_B2930_040_F	CROSS	Final	0	FALSE	FALSE		TRUE	XY	0.614906832	0.648181012	1.127	15949.15	2647	13	1	0.062985943	287.3239907	FALSE	0.238884244	0.398642001	1.064571018	1.0748537	0.392873667	0.605110719	0.750761139	0.795277625	0.629438038	1.444528635	0.742547533	0.919108696	0.174115891	0.698031047	0.20972908	0.299514445	0.759852534
ER1409	Cr_B2930_041_M	CROSS	Final	0	FALSE	FALSE		TRUE	XX	0.848334833	0.02340234	1.111	17353.66	2743	10	109	0.052286405	203.5247101	FALSE	0.227329611	0.376981069	1.044102719	1.004975519	0.417548888	0.574633938	0.735752719	0.743935433	0.620387984	1.354296711	0.577054177	0.930466726	0.165498262	0.643207382	0.202089974	0.290025332	0.73321723
EJ4888	Cr_B2930_042_M	CROSS	Final	0	FALSE	FALSE		TRUE	XX	0.848648649	0.022972973	1.11	17571.52	2710	15	109	0.050196574	190.3182226	FALSE	0.166462525	0.42750991	1.234212915	0.960645272	0.480038085	0.499159934	0.729874147	0.846938562	0.667045215	1.287424013	0.582419651	0.817459045	0.135787892	0.627777132	0.218535417	0.2406166	0.641435596
XS7689	Cr_B2930_043_M	CROSS	Final	0	FALSE	FALSE		TRUE	XX	0.815412186	0.035394265	1.116	16277.03	2772	16	109	0.052970569	191.7560525	FALSE	0.18338723	0.387847096	1.035876745	0.95846706	0.479509993	0.499906831	0.68231108	0.877616944	0.606621611	1.450694358	0.722244648	0.834488691	0.141119084	0.656999342	0.191373943	0.305399638	0.690236358
KS4967	Cr_B2930_044_M	CROSS	Final	0	FALSE	FALSE		TRUE	XY	0.612688554	0.66282165	1.127	18282.27	2678	11	1	0.071235449	331.068991	FALSE	0.223331149	0.366092428	1.086024975	1.032147634	0.510275849	0.598229924	0.719440267	0.81193426	0.599214485	1.369687806	0.589204786	0.844041873	0.120882155	0.670157542	0.16841455	0.280162172	0.734044581
VU9101	Cr_B2930_045_M	CROSS	Final	0	FALSE	FALSE		TRUE	XY	0.604259095	0.646850044	1.127	16853.8	2510	19	1	0.063666813	258.6179074	FALSE	0.187850833	0.38543241	1.023567504	0.98719588	0.488495233	0.5721559	0.652849878	0.785579604	0.617249594	1.348301429	0.709394996	0.819281206	0.145189826	0.673972713	0.19170753	0.252465349	0.730221162
UL8727	Cr_B2930_046_M	CROSS	Final	0	FALSE	FALSE		TRUE	XY	0.608444444	0.666666667	1.125	15750.36	2735	10	1	0.063535032	252.8933989	FALSE	0.203106444	0.378784947	1.162703441	0.959406525	0.406149397	0.539670139	0.712110621	0.775220281	0.654651623	1.280351531	0.673381352	0.685190604	0.154853584	0.582462806	0.183170394	0.265009783	0.802711713
YU8806	Cr_B2930_047_F	CROSS	Final	0	FALSE	FALSE		TRUE	XX	0.829290207	0.030997305	1.113	16719.24	2842	14	109	0.054061059	187.2220001	FALSE	0.277823608	0.412458902	1.121223112	1.042152539	0.424899658	0.586629483	0.680712698	0.786040443	0.601522503	1.44324729	0.67538949	0.862419506	0.168129637	0.717975154	0.249114172	0.287154175	0.730954212
BH1003	Cr_B2930_048_F	CROSS	Final	0	FALSE	FALSE		TRUE	XX	0.833857207	0.032330489	1.1135	18879.86	2661	9	109	0.054524489	206.0875114	FALSE	0.215361786	0.393858888	1.138303035	1.034488696	0.491158347	0.562027523	0.728024532	0.987189612	0.686392863	1.409597443	0.711234151	0.818968011	0.151219355	0.749105198	0.226166952	0.262184171	0.787135145
YX7498	Cr_B2930_049_F	CROSS	Final	0	FALSE	FALSE		TRUE	XX	0.825581395	0.032200358	1.118	17087.15	2916	19	109	0.05389743	209.2472333	FALSE	0.241409501	0.422832399	1.07261899	0.997708891	0.467602888	0.545146546	0.709714671	0.962126593	0.576573674	1.376121941	0.612682683	0.826878749	0.162578326	0.648206457	0.22391097	0.240239031	0.734353071
HM2517	Cr_B2930_050_F	CROSS	Final	0	FALSE	FALSE		TRUE	XX	0.837240757	0.03471596	1.109	15930.13	2685	7	109	0.044559631	170.6778037	FALSE	0.254423572	0.389827383	1.205577276	0.964587369	0.443875913	0.599304673	0.658940102	0.730188746	0.651218884	1.440791962	0.706836768	0.832510587	0.177023063	0.591897325	0.234649719	0.253230863	0.64782908
CC9034	Cr_B2930_051_F	CROSS	Final	0	FALSE	FALSE		TRUE	XX	0.838868941	0.02962298	1.114	16889.07	2748	9	109	0.055116407	211.5985932	FALSE	0.250102621	0.409021995	1.180941473	1.046357369	0.488067213	0.571375544	0.682098058	0.897444468	0.666703484	1.520095786	0.658887777	0.958726715	0.184498051	0.62721048	0.240629037	0.299069209	0.791340325
AV7060	Cr_B2930_052_F	CROSS	Final	0	FALSE	FALSE		TRUE	XX	0.833032491	0.029783394	1.108	18352.26	2721	13	109	0.049543158	190.8455041	FALSE	0.271465271	0.414281504	1.180345382	1.053276532	0.457001049	0.564181335	0.730972823	0.880273273	0.699042143	1.46935618	0.720347426	1.006252339	0.175564252	0.708523267	0.267051644	0.314293794	0.77429175
SH8879	Cr_B2930_053_M	CROSS	Final	0	FALSE	FALSE		TRUE	XY	0.618479222	0.65694076	1.131	17535.51	2687	19	1	0.071757083	332.5318012	FALSE	0.164181133	0.367083693	1.176412847	0.999514662	0.440306539	0.560348666	0.552878111	0.849932477	0.630891237	1.317840151	0.525448057	0.799862649	0.134241885	0.603004966	0.157737066	0.212825282	0.632487997
HI3126	Cr_B2930_054_M	CROSS	Final	0	FALSE	FALSE		TRUE	XY	0.60509839	0.673971377	1.118	16046.05	2477	10	1	0.061343071	207.5399994	FALSE	0.20921043	0.372428219	1.013458451	0.854229184	0.437490981	0.463291731	0.629126987	0.819018015	0.559016253	1.32182104	0.579395106	0.783993808	0.154804501	0.654740775	0.1910128	0.299388415	0.693254938
XY4961	Cr_B2930_055_M	CROSS	Final	0	FALSE	FALSE		TRUE	XY	0.61934339	0.664152618	1.127	16437.86	2712	9	1	0.067670767	328.0435785	FALSE	0.236040409	0.363003381	1.134819016	0.941910734	0.420492604	0.552018213	0.793959632	0.81245352	0.619727743	1.294632973	0.668456704	0.838125956	0.146612728	0.610602469	0.204588633	0.279294205	0.687133097
TD0191	Cr_B2930_056_M	CROSS	Final	0	FALSE	FALSE		TRUE	XY	0.607269504	0.642730496	1.128	17612.73	2719	14	1	0.066974522	310.2124002	FALSE	0.202467149	0.393067884	1.274248523	1.018183788	0.456204023	0.541142569	0.700402343	0.885098259	0.59422916	1.289691895	0.619949188	0.804361218	0.170615195	0.641751595	0.17657679	0.267193047	0.655094214
EJ8227	Cr_B2930_057_F	CROSS	Final	0	FALSE	FALSE		TRUE	XX	0.840560072	0.03432701	1.107	16704.75	2582	6	109	0.043209971	149.7666375	FALSE	0.211855883	0.323201445	1.013903106	0.967209806	0.384920409	0.453523642	0.614016896	0.915128818	0.559301926	1.275984218	0.571813336	0.846705174	0.12774808	0.599470137	0.163366687	0.223349619	0.620063079
DL9785	Cr_B2930_058_F	CROSS	Final	0	FALSE	FALSE		TRUE	XX	0.830630631	0.034234234	1.11	15789.82	2693	10	109	0.048850209	206.2323041	FALSE	0.195569027	0.35016229	1.075946309	0.917299802	0.410327632	0.492659152	0.658018845	0.734777154	0.587213737	1.231679547	0.580373888	0.770306372	0.144840144	0.616156433	0.167196319	0.210578697	0.695068029
NN9127	Cr_B2930_059_F	CROSS	Final	0	FALSE	FALSE		TRUE	XX	0.83438061	0.034560144	1.114	16185.8	2661	14	109	0.049881397	172.3119134	FALSE	0.242125834	0.431180453	1.221997161	0.917656293	0.450765523	0.562715513	0.715256642	0.799775178	0.664038904	1.392517013	0.618381596	0.861310603	0.144262267	0.671761723	0.192514442	0.267147769	0.702220523
YG1571	Cr_B2930_060_F	CROSS	Final	0	FALSE	FALSE		TRUE	XX	0.767050487	0.067759079	1.129	16415.31	2679	21	109	0.097520316	926.011078	FALSE	0.283089311	0.379645489	0.999310752	1.029404602	0.446534249	0.597186254	0.685031054	0.938392028	0.591398975	1.428787758	0.630569714	0.843115143	0.125797166	0.622833036	0.17952748	0.234719844	0.748386527
ZW9172	Cr_B2930_061_F	CROSS	Final	0	FALSE	FALSE		TRUE	XX	0.749334516	0.050576752	1.127	14816.36	2620	39	109	0.104091808	1180.534347	FALSE	0.195999532	0.366689207	1.079819735	1.035004415	0.426622948	0.448288185	0.590428342	1.457577786	0.592318144	1.321579488	0.653939209	0.763547763	0.124861961	0.663253237	0.148484494	0.263222512	0.665210532
DR0909	Cr_B2930_062_F	CROSS	Final	0	FALSE	FALSE		TRUE	XX	0.84084761	0.03336339	1.109	15803.23	2820	17	142	0.050141665	186.7994719	FALSE	0.218879351	0.356193082	1.085031581	0.96549903	0.438960989	0.465094892	0.642527012	0.843372072	0.592030995	1.233292443	0.605445977	0.799393711	0.163764025	0.555013238	0.184709114	0.249695843	0.697136113
PZ1204	Cr_B2930_063_F	CROSS	Final	0	FALSE	FALSE		TRUE	XX	0.839205059	0.028906956	1.107	16549.55	2709	13	142	0.047931034	178.2126621	FALSE	0.18254268	0.391370056	1.09749179	0.953258299	0.406657476	0.487384726	0.715185422	0.788480447	0.583097273	1.40910139	0.610530036	0.814342171	0.139701647	0.610650885	0.185261786	0.266714131	0.671317171
PZ9894	Cr_B2930_064_M	CROSS	Final	0	FALSE	FALSE		TRUE	XY	0.616031887	0.678476528	1.129	17982.64	2619	15	0	0.069598067	343.1975503	FALSE	0.242289221	0.411452363	1.179748868	0.959536494	0.565044933	0.567324909	0.629607197	0.956756035	0.585842768	1.511068395	0.731038351	0.918052042	0.174112359	0.712186837	0.227163522	0.242289221	0.745107475
MX3374	Cr_B2930_065_M	CROSS	Final	0	FALSE	FALSE		TRUE	XY	0.607555556	0.657777778	1.125	16601.38	2721	13	0	0.067547771	293.5133546	FALSE	0.225282449	0.345453168	1.10629344	0.949017377	0.431470103	0.469900638	0.57471119	0.906370325	0.54109953	1.322901912	0.529714936	0.758430834	0.139566694	0.623020421	0.179382656	0.218174607	0.644343947
KA5753	Cr_B2930_066_M	CROSS	Final	0	FALSE	FALSE		TRUE	XY	0.607126949	0.654342984	1.1225	15690.08	2607	15	0	0.061587964	256.2840952	FALSE	0.199425332	0.323771392	1.045564899	0.860352367	0.40541532	0.570424008	0.681768225	0.797765062	0.581513815	1.262326022	0.59566288	0.673865144	0.142574135	0.590181711	0.236072684	0.327786667	0.633648658
JL1589	Cr_B2930_067_M	CROSS	Final	0	FALSE	FALSE		TRUE	XY	0.604982206	0.649021352	1.124	15935.62	2603	12	0	0.061802108	289.5320351	FALSE	0.182798061	0.342377694	1.016214144	0.965196354	0.408832602	0.523355932	0.721340101	0.914115811	0.609703386	1.249841739	0.633674844	0.776060289	0.119606284	0.606942275	0.195034801	0.303471138	0.642397443
DR2100	Cr_B2930_068_M	CROSS	Final	0	FALSE	FALSE		TRUE	XY	0.609777778	0.651555556	1.125	17446.06	2583	20	0	0.062721283	287.8893518	FALSE	0.211910294	0.411783488	1.092108964	1.091879686	0.449614377	0.540523148	0.669549405	0.909718227	0.563852196	1.346435709	0.680955991	0.813192142	0.150177163	0.600708652	0.194771756	0.268541988	0.671842186
YP0390	Cr_B2930_069_M	CROSS	Final	0	FALSE	FALSE		TRUE	XY	0.611160714	0.658482143	1.12	16424.82	2583	12	0	0.05739732	229.8853955	FALSE	0.197201525	0.303991113	0.922445294	0.80920206	0.411328652	0.534435007	0.658332847	0.762321796	0.504358578	1.121655974	0.539001267	0.723234615	0.140884325	0.548255553	0.184720416	0.224477315	0.619367433
RA9644	Cr_B2930_070_M	CROSS	Final	0	FALSE	FALSE		TRUE	XY	0.59839715	0.662511131	1.123	15562.74	2666	15	0	0.060752251	251.6655897	FALSE	0.215450529	0.376283417	1.153460316	0.98658736	0.379431963	0.595974844	0.648472036	0.770494271	0.530112395	1.143115093	0.604328131	0.704374797	0.136865382	0.621548752	0.154086003	0.285553877	0.629323733
SR8233	Cr_B2930_071_M	CROSS	Final	0	FALSE	FALSE		TRUE	XXY	0.815813118	0.634321653	1.113	13335.35	2799	13	142	0.059369646	316.5819216	FALSE	0.202469386	0.391890745	0.97762718	0.921760627	0.345022832	0.453381448	0.660950063	0.709767681	0.479102558	1.182646181	0.484726708	0.559190449	0.137154262	0.540893216	0.159200928	0.256761177	0.544492671
WS9450	Cr_B2930_072_M	CROSS	Final	0	FALSE	FALSE		TRUE	XY	0.595982143	0.665625	1.12	15971.67	2664	15	0	0.058139688	249.0198514	FALSE	0.150078228	0.272732901	0.975978066	0.856266104	0.406532306	0.42506512	0.530188752	0.754836513	0.499133766	1.107085204	0.567692656	0.646144062	0.106501071	0.529374811	0.114264817	0.194531938	0.595429266
CG2477	Cr_B2930_073_M	CROSS	Final	0	FALSE	FALSE		TRUE	XY	0.610017889	0.644454383	1.118	15521.95	2619	9	0	0.060481002	265.0903634	FALSE	0.187540906	0.335782618	0.997490845	0.909421996	0.39370061	0.48138291	0.650884842	0.852277103	0.488405225	1.245333464	0.598314117	0.67620383	0.126337244	0.637033486	0.198428715	0.232831616	0.575829824
MS6979	Cr_B2930_074_M	CROSS	Final	0	FALSE	FALSE		TRUE	XY	0.599821747	0.643493761	1.122	13283.91	2652	22	0	0.067715792	325.8958529	FALSE	0.198435533	0.367587521	1.024020694	0.971174813	0.352757552	0.454835921	0.65899266	0.624364305	0.550666131	1.155457887	0.502562829	0.7166564	0.113144388	0.550139178	0.185336981	0.255120645	0.623385677
ZI0006	Cr_B2930_075_F	CROSS	Final	0	FALSE	FALSE		TRUE	XX	0.767631103	0.043399638	1.106	13198.05	2790	22	142	0.093941357	1049.04768	FALSE	0.217153343	0.362629413	1.015604817	1.154564772	0.483177553	0.530229969	0.624637877	0.788449994	0.583495426	1.350502854	0.682070618	0.710938525	0.109561666	0.674114895	0.181390475	0.242763193	0.633654363
XN5023	Cr_B2930_076_F	CROSS	Final	0	FALSE	FALSE		TRUE	XX	0.783602151	0.038978495	1.116	14876.42	2734	20	142	0.08984955	878.4401326	FALSE	0.198502058	0.309079737	0.976242936	0.927037549	0.389744305	0.511346142	0.576146678	0.808595075	0.46429181	1.28209609	0.64316549	0.63032638	0.135382034	0.619235001	0.144725679	0.204551901	0.654794632
MY0047	Cr_B2930_078_M	CROSS	Final	0	FALSE	FALSE		TRUE	XY	0.603033006	0.650312221	1.121	13743.81	2595	16	0	0.070645728	366.2802583	FALSE	0.189176051	0.339862051	0.924634327	0.938022171	0.323782087	0.474831887	0.59932428	0.71173851	0.507210096	1.12035878	0.618969485	0.697986867	0.118598832	0.549774707	0.153087081	0.253641428	0.570584073
PT7458	Cr_B2930_079_M	CROSS	Final	0	FALSE	FALSE		TRUE	XY	0.588731145	0.648181012	1.127	13739.89	2772	16	0	0.076067428	410.842857	FALSE	0.196508074	0.307425965	0.954738117	0.787997377	0.372928656	0.459173866	0.595273903	0.740762658	0.459974455	1.13792731	0.585739622	0.671693709	0.129040302	0.600222995	0.174018817	0.304441953	0.630936479
IX1836	Cr_B2930_080_M	CROSS	Final	0	FALSE	FALSE		TRUE	XXY	0.847153743	0.666965486	1.1155	15398.53	2795	15	142	0.053281353	210.5760916	FALSE	0.192550794	0.279766888	0.949895605	0.903592497	0.356332617	0.430170813	0.621227959	0.764813054	0.504983129	1.136666628	0.509464075	0.674934369	0.12403778	0.596225579	0.167483473	0.232944249	0.635515033
KK8857	Cr_B2930_081_M	CROSS	Final	0	FALSE	FALSE		TRUE	XY	0.606791778	0.656389634	1.119	14382.17	2560	15	0	0.058750275	263.5386131	FALSE	0.177233364	0.33305132	0.917107914	0.962511361	0.391248387	0.480108426	0.585794858	0.781245225	0.459249262	1.150104776	0.560763861	0.656437893	0.147335229	0.507572992	0.197744875	0.264633261	0.628695205
BI9980	Cr_B2930_082_M	CROSS	Final	0	FALSE	FALSE		TRUE	XY	0.619090098	0.657448707	1.121	13794.05	2610	18	0	0.064924226	305.7460694	FALSE	0.188559582	0.349861031	1.033054226	0.940405574	0.352470852	0.489486466	0.60663844	0.678843493	0.461648373	1.043928481	0.534795862	0.583730009	0.113962193	0.483904348	0.124328982	0.222777238	0.567491122
XY9706	Cr_B2930_083_F	CROSS	Final	0	FALSE	FALSE		TRUE	XX	0.821911632	0.03471596	1.109	14115.2	2887	12	142	0.04956622	212.7665663	FALSE	0.147500613	0.359754136	0.991130437	0.885853823	0.320718191	0.549549592	0.597370396	0.707818741	0.51469354	1.146919988	0.656455656	0.648379253	0.114699083	0.600841832	0.176972397	0.227414489	0.708456352
SE6813	Cr_B2930_084_M	CROSS	Final	0	FALSE	FALSE		TRUE	XY	0.605251446	0.664441478	1.1235	16037.45	2676	15	0	0.061574786	305.0763566	FALSE	0.166921795	0.304287769	0.907625567	0.925583533	0.359159334	0.438037208	0.54965096	0.70204426	0.467343612	1.155171149	0.520781034	0.609510849	0.111551397	0.534311863	0.137365974	0.243866694	0.591739944
AS0134	Cr_B2930_085_M	CROSS	Final	0	FALSE	FALSE		TRUE	XY	0.612053571	0.640178571	1.12	15160.65	2510	10	0	0.061685702	265.1578328	FALSE	0.182973724	0.312255807	0.824766921	1.012028061	0.459874838	0.472209404	0.568247523	0.843631552	0.542259186	1.180820332	0.541137862	0.660262067	0.121037052	0.526824488	0.177499023	0.213711198	0.611319564
IR7982	Cr_B2930_086_M	CROSS	Final	0	FALSE	FALSE		TRUE	XXY	0.825675676	0.653153153	1.11	13571.23	2719	10	142	0.051234351	188.9385296	FALSE	0.182813188	0.361868427	1.074110376	0.953192826	0.381395027	0.472175296	0.639809316	0.777232369	0.621093254	1.172038118	0.62411435	0.676283531	0.080759071	0.553008052	0.197844986	0.25605636	0.690946902
DQ0963	Cr_B2930_087_M	CROSS	Final	0	FALSE	FALSE		TRUE	XY	0.600533808	0.664145907	1.124	13870.97	2674	12	0	0.067670767	325.6392696	FALSE	0.180953407	0.361041698	0.99481118	0.960422823	0.355995188	0.526855577	0.612646236	0.780550811	0.491602104	1.09725532	0.68964155	0.659074122	0.115637157	0.507823027	0.160118533	0.241583612	0.601760194
PZ2592	Cr_B2930_088_F	CROSS	Final	0	FALSE	FALSE		TRUE	XX	0.82078853	0.031362007	1.116	14998.27	2983	18	142	0.061448495	277.926172	FALSE	0.178620656	0.318770196	1.042320533	0.984180476	0.41724825	0.458919736	0.621605215	0.838363614	0.537395477	1.195004856	0.619938356	0.724483779	0.114013184	0.616204591	0.170286358	0.222025675	0.679678597
CT0037	Cr_B2930_089_F	CROSS	Final	0	FALSE	FALSE		TRUE	XX	0.762900356	0.118772242	1.124	13718.44	2849	27	142	0.100801669	1083.203951	FALSE	0.192150185	0.331889147	0.861541364	1.029490539	0.42701661	0.507054888	0.545397452	0.77968072	0.514563033	1.269386692	0.510845408	0.67573301	0.116995845	0.612096018	0.178227315	0.229034856	0.596059204
LS2615	Cr_B2930_090_M	CROSS	Final	0	FALSE	FALSE		TRUE	XY	0.618198037	0.663693131	1.121	13835.25	2548	9	1	0.062049198	270.2306161	FALSE	0.181203841	0.363347312	0.904645903	0.985743115	0.450805089	0.539347054	0.652391652	0.754016144	0.525035781	1.160441832	0.697782961	0.724309411	0.155833858	0.526987318	0.171807551	0.234545858	0.641983454
GE0080	Cr_B2930_091_M	CROSS	Final	0	FALSE	FALSE		TRUE	XY	0.610813226	0.648793566	1.119	13804.08	2532	10	1	0.054918735	208.1843364	FALSE	0.177411376	0.351128191	0.900096509	0.896112178	0.384886338	0.456749174	0.612717607	0.648576583	0.496157826	1.109092761	0.566644257	0.68508754	0.136916089	0.569614394	0.193493584	0.2897695	0.48833405
MS0931	Cr_B2930_092_F	CROSS	Final	0	FALSE	FALSE		TRUE	XX	0.781867145	0.040394973	1.114	14424.08	2790	19	109	0.076320009	560.6529817	FALSE	0.185384399	0.325427961	0.941134335	0.994170635	0.372155367	0.550329602	0.670475886	0.880957201	0.557678423	1.283617106	0.598651564	0.775716543	0.142123417	0.637406194	0.192039934	0.229546651	0.731346306
HL8869	Cr_B2930_093_F	CROSS	Final	0	FALSE	FALSE		TRUE	XX	0.773991031	0.043946188	1.115	13828.82	2946	15	109	0.07516253	561.8026399	FALSE	0.197124614	0.320562514	0.985767695	0.890097899	0.431490305	0.451231691	0.564401178	0.720886015	0.544732104	1.256362084	0.662891172	0.699264496	0.129005984	0.559773161	0.146505674	0.254613267	0.567004438
EF5168	Cr_B2930_094_F	CROSS	Final	0	FALSE	FALSE		TRUE	XX	0.799279928	0.04320432	1.111	13248.02	2729	14	109	0.066790029	432.0209054	FALSE	0.21233358	0.386850194	0.962709733	0.901115633	0.371149738	0.554346893	0.687725292	0.802912296	0.467466001	1.225088518	0.578878857	0.691197508	0.089673762	0.591409029	0.155721356	0.233166878	0.726297087
RW6200	Cr_B2930_095_F	CROSS	Final	0	FALSE	FALSE		TRUE	XX	0.828584351	0.034373587	1.1055	13378.68	2635	9	109	0.043968812	149.6019026	FALSE	0.181707034	0.357210167	1.035154552	0.976329609	0.364535255	0.510439052	0.63997352	0.708664908	0.533087029	1.245115498	0.622557749	0.714943555	0.108904627	0.570385182	0.201589416	0.295843867	0.610374184
FI8707	Cr_B2930_096_F	CROSS	Final	0	FALSE	FALSE		TRUE	XX	0.846153846	0.029411765	1.105	14748.32	2788	19	109	0.044257632	146.5247619	FALSE	0.197649631	0.289388894	0.881727549	0.888643591	0.386891525	0.585151396	0.600068349	0.680552093	0.476393245	1.176879812	0.647124556	0.67112729	0.114792736	0.561623292	0.126183864	0.236840536	0.594372785
MZ4861	Cr_B2930_097_F	CROSS	Final	0	FALSE	FALSE		TRUE	XX	0.835888188	0.036970243	1.109	15059.91	2788	15	109	0.0462047	160.8754217	FALSE	0.163613227	0.352990225	0.984999435	1.031945276	0.408634659	0.498343047	0.702593975	0.73034979	0.48898044	1.254788616	0.637985343	0.67802543	0.1398415	0.540773588	0.190638626	0.239178102	0.721916803
ZB5645	Cr_CD_02_F_301	CROSS	Final	0	FALSE	FALSE		TRUE	XX	0.855416086	0.023245002	1.0755	16071.83	1231	17	18	0.025071382	83.95433136	FALSE	0.208936979	0.378923824	1.192396743	1.063413313	0.46236173	0.535346565	0.737439271	0.838921169	0.623264359	1.378809842	0.711617697	0.918999159	0.130476726	0.638321759	0.180875461	0.262322306	0.809677458
BZ3673	Cr_CD_02_F_302	CROSS	Final	0	FALSE	FALSE		TRUE	XX	0.85200747	0.027544351	1.071	16743.69	1267	16	26	0.012552163	29.96487537	FALSE	0.165554937	0.342636607	1.153808021	1.055084244	0.423741804	0.518643245	0.578188077	0.878719262	0.585056337	1.37890779	0.616351715	0.816606298	0.121359175	0.597837274	0.198462863	0.2202024	0.713821288
XS6326	Cr_CD_02_F_307	CROSS	Final	0	FALSE	FALSE		TRUE	XX	0.877844868	0.023223409	1.0765	19198.96	1342	16	13	0.029917637	83.81283882	FALSE	0.212199004	0.357363123	1.130269608	0.981719888	0.439450907	0.615866721	0.700037951	0.897965347	0.680141039	1.465235683	0.654722994	0.858379868	0.137611627	0.670869703	0.192354178	0.310277237	0.705975772
TD2217	Cr_CD_02_F_310	CROSS	Final	0	FALSE	FALSE		TRUE	XX	0.857875116	0.027027027	1.073	17105.63	1332	14	27	0.025703931	72.3183147	FALSE	0.183039117	0.309371768	1.073622924	1.057546349	0.41237877	0.475749706	0.571449174	0.793130532	0.572969141	1.207087729	0.665219453	0.746011551	0.134107868	0.584953497	0.151470569	0.214198442	0.585070418
PR0610	Cr_CD_02_F_314	CROSS	Final	0	FALSE	FALSE		TRUE	XX	0.91086351	0.032497679	1.077	16097.36	1758	17	188	0.031550626	88.14916134	FALSE	0.201088909	0.391306469	1.062534663	1.096515396	0.461939181	0.510456462	0.618921471	0.850388038	0.591152938	1.312575707	0.735213852	0.730741068	0.142569987	0.584754372	0.180153796	0.23531813	0.752483768
RW0133	Cr_CD_02_F_315	CROSS	Final	0	FALSE	FALSE		TRUE	XX	0.899065421	0.028971963	1.07	16440.52	1279	25	93	0.018144081	53.35603685	FALSE	0.172804722	0.378455114	1.06578118	1.043032512	0.472856004	0.540919532	0.650344274	0.844681158	0.512027507	1.285421395	0.689150826	0.832455269	0.143061142	0.594628285	0.164714955	0.214105111	0.636719404
KK1677	Cr_CD_02_F_316	CROSS	Final	0	FALSE	FALSE		TRUE	XX	0.861652739	0.020891365	1.077	19650.63	1338	17	69	0.023321986	73.22793467	FALSE	0.22889853	0.445838154	1.176959802	1.044750291	0.460595952	0.533723383	0.731732316	1.03116294	0.643643531	1.451760171	0.718501187	0.912642559	0.151089314	0.742622553	0.216023623	0.25520812	0.78765928
ZC6768	Cr_CD_02_F_317	CROSS	Final	0	FALSE	FALSE		TRUE	XX	0.886300093	0.029822926	1.073	17578.61	1346	4	123	0.02545794	78.68941077	FALSE	0.266858368	0.379324579	1.167213813	1.179217036	0.498275943	0.568190446	0.736690656	0.841135756	0.659039479	1.369789522	0.665524632	0.853594077	0.16173062	0.696528216	0.190401824	0.264639763	0.709669184
RV0861	Cr_CD_02_F_330	CROSS	Final	0	FALSE	FALSE		TRUE	XX	0.903899721	0.026462396	1.077	17039.78	1700	13	220	0.018414232	30.73094387	FALSE	0.191375673	0.378701999	1.13006132	1.002418852	0.505112058	0.485862987	0.7085184	0.715560744	0.591967622	1.334406642	0.590324409	0.930586952	0.141081606	0.670431062	0.21408723	0.331753045	0.72301389
QY8267	Cr_CD_02_F_344	CROSS	Final	0	FALSE	FALSE		TRUE	XX	0.809875404	0.029995385	1.0835	16183.74	1617	12	24	0.03962662	196.499891	FALSE	0.205267756	0.393604939	1.098262824	1.093504962	0.475847981	0.573600416	0.744759864	0.832872994	0.637800656	1.495389816	0.70700592	0.840905748	0.138348738	0.690075347	0.212806187	0.280837433	0.738519032
HT8575	Cr_CD_02_F_346	CROSS	Final	0	FALSE	FALSE		TRUE	XX	0.849907063	0.030669145	1.076	13589.85	1480	24	178	0.049769383	480.7086771	FALSE	0.193600387	0.37218957	0.972049074	0.865498956	0.412219448	0.548939144	0.685290918	0.769692151	0.57653327	1.40001557	0.636136581	0.877861124	0.134291413	0.644378027	0.183372164	0.26578662	0.714503899
YX0104	Cr_CD_02_F_347	CROSS	Final	0	FALSE	FALSE		TRUE	XX	0.844939647	0.025069638	1.077	16650.75	1558	11	1	0.025884033	51.50770518	FALSE	0.16569822	0.320886405	1.035989236	0.912391215	0.420581601	0.523760123	0.591684983	0.873413997	0.556491377	1.230935384	0.584357986	0.759605325	0.140654307	0.63204352	0.156269217	0.247376212	0.617509642
KV7812	Cr_CD_02_F_349	CROSS	Final	0	FALSE	FALSE		TRUE	XX	0.875231054	0.025878004	1.082	16798.45	1784	20	167	0.024134637	57.71798412	FALSE	0.249427706	0.326041897	1.071527139	1.067300559	0.433075552	0.477067694	0.667144702	0.927228151	0.611306233	1.400724087	0.601900605	0.890677169	0.129059491	0.653810142	0.236986085	0.241212665	0.692027944
HX3365	Cr_CD_02_F_351	CROSS	Final	0	FALSE	FALSE		TRUE	XX	0.859141791	0.028451493	1.072	15274.34	1234	19	66	0.010488689	30.16406499	FALSE	0.183772261	0.316216608	0.988389677	0.913165477	0.395172557	0.449119241	0.611221171	0.815223439	0.533574608	1.231869918	0.640944223	0.722911758	0.129236353	0.654038078	0.15581688	0.216245022	0.695283723
YI8797	Cr_CD_02_F_352	CROSS	Final	0	FALSE	FALSE		TRUE	XX	0.840782123	0.029795158	1.074	15532.93	1333	19	12	0.017212827	47.81121954	FALSE	0.185348207	0.324021371	1.028396061	1.077646279	0.452265076	0.445505242	0.63690511	0.811244445	0.503382296	1.273102047	0.527395801	0.786844663	0.111826966	0.487995627	0.152385969	0.207880987	0.661304891
JA3796	Cr_CD_02_F_353	CROSS	Final	0	FALSE	FALSE		TRUE	XX	0.8081557	0.026876738	1.079	14830.32	1552	29	76	0.049090709	397.596415	FALSE	0.205794559	0.393990042	1.17576662	1.10833721	0.459261711	0.464723493	0.672945511	0.978603026	0.66269624	1.577578474	0.693511481	0.795127601	0.163111743	0.688521704	0.175114177	0.217257559	0.739633197
QJ5194	Cr_CD_02_F_354	CROSS	Final	0	FALSE	FALSE		TRUE	XX	0.844454887	0.027725564	1.064	15567.02	1212	26	120	0.018882056	70.11204471	FALSE	0.202286618	0.40438052	1.132650886	0.991390717	0.434572552	0.523093022	0.595489662	0.893298731	0.618615474	1.404636132	0.673603516	0.747284923	0.169075382	0.496112908	0.171195248	0.220787267	0.6687214
JX3711	Cr_CD_02_F_356	CROSS	Final	0	FALSE	FALSE		TRUE	XY	0.621163536	0.63032524	1.0915	15080.68	1291	23	1	0.040553481	142.3623036	FALSE	0.145550488	0.325051704	0.952543396	0.991732616	0.415962738	0.527496186	0.571260798	0.871114695	0.514167873	1.322752222	0.569404117	0.732128899	0.148733368	0.595530264	0.187458418	0.208611314	0.65892264
VK1742	Cr_CD_02_F_359	CROSS	Final	0	FALSE	FALSE		TRUE	XX	0.826672862	0.036245353	1.076	12378.8	1610	30	219	0.077185372	1177.864749	FALSE	0.20551269	0.353750027	1.08750465	1.166995407	0.514993474	0.543913891	0.748457182	0.974004127	0.608378957	1.421381987	0.624374048	0.818011594	0.163263029	0.640046006	0.204462507	0.24824705	0.698371542
KZ8030	Cr_CD_02_F_360	CROSS	Final	0	FALSE	FALSE		TRUE	XX	0.782790698	0.024186047	1.075	14410.83	1271	25	0	0.063107841	720.3579056	FALSE	0.169247721	0.358549805	1.172937364	1.239276365	0.433840407	0.498444601	0.652356633	1.061077042	0.674007018	1.661875226	0.738541819	0.853247224	0.1228243	0.671231327	0.181460759	0.239125727	0.685526133
HF3418	Cr_CD_02_F_366	CROSS	Final	0	FALSE	FALSE		TRUE	XX	0.824537037	0.027777778	1.08	15823.85	1441	17	1	0.02802438	87.34218805	FALSE	0.215244773	0.37209666	1.110286382	1.191556135	0.457600529	0.587341433	0.709562041	0.94679894	0.728710357	1.449710831	0.609143971	0.974289097	0.138272332	0.667094487	0.19887707	0.24393565	0.769724408
QJ5216	Cr_CD_02_F_368	CROSS	Final	0	FALSE	FALSE		TRUE	XX	0.835354478	0.037779851	1.072	13649.02	1424	22	177	0.05413244	521.1482553	FALSE	0.193786783	0.380173768	1.095609659	1.14103416	0.453439092	0.576891163	0.786210195	1.002416166	0.714776503	1.514027926	0.66532241	0.872883073	0.129093501	0.674846902	0.18081882	0.286320887	0.769066109
EL2206	Cr_CD_02_F_369	CROSS	Final	0	FALSE	FALSE		TRUE	XX	0.859665428	0.043680297	1.076	13974.41	1636	19	166	0.030839007	114.0894806	FALSE	0.1751773	0.358798604	0.976069597	0.940075242	0.389282889	0.553654727	0.646753447	0.797171211	0.570542735	1.394477144	0.62979388	0.815919762	0.141043488	0.578557382	0.189417612	0.27722094	0.64088558
YI6652	Cr_CD_02_F_370	CROSS	Final	0	FALSE	FALSE		TRUE	XX	0.86804901	0.033930254	1.061	15057.2	837	25	1	0.031429826	126.140679	FALSE	0.206080793	0.352389523	0.968573088	0.930119727	0.425975575	0.484685024	0.615054537	0.802738817	0.49590889	1.225460135	0.556477914	0.709892878	0.111508106	0.561326093	0.161251746	0.244733395	0.578859232
CC0558	Cr_CD_02_F_373	CROSS	Final	0	FALSE	FALSE		TRUE	XX	0.906424581	0.034450652	1.074	14322.09	1651	23	204	0.008900725	43.09232931	FALSE	0.175533011	0.340313403	0.966758182	0.844080577	0.400919073	0.568143242	0.646972506	0.716794706	0.489942378	1.25519369	0.526040455	0.838285334	0.142227822	0.537700763	0.195292694	0.253524408	0.642294418
FN4369	Cr_CD_02_F_376	CROSS	Final	0	FALSE	FALSE		TRUE	XX	0.836886006	0.038461538	1.079	13716.64	1544	21	17	0.027960685	92.73732052	FALSE	0.213682079	0.370644725	0.97006269	1.047997232	0.379611936	0.482552604	0.710961322	0.729843498	0.64425402	1.24884818	0.560705858	0.834533865	0.166075666	0.624278281	0.174313835	0.237303025	0.692297858
TL8054	Cr_CD_02_F_377	CROSS	Final	0	FALSE	FALSE		TRUE	XX	0.860093897	0.030985915	1.065	13859.33	1182	20	0	0.020802767	57.67006633	FALSE	0.175477465	0.37101362	0.917865472	1.006253587	0.444826715	0.508899078	0.642455323	0.818077095	0.623478936	1.374164603	0.57455882	0.742676622	0.120207836	0.609192531	0.179157296	0.24322966	0.698879409
YM5578	Cr_CD_02_F_380	CROSS	Final	0	FALSE	FALSE		TRUE	XX	0.870318352	0.029962547	1.068	13133.57	1582	17	28	0.012134856	26.64039172	FALSE	0.179006906	0.408647412	1.013281117	0.974753897	0.399967366	0.529711206	0.730189804	0.827878388	0.66592701	1.208049159	0.630064716	0.702855274	0.133627018	0.624430301	0.199869472	0.23923424	0.633795613
LF0726	Cr_CD_02_F_382	CROSS	Final	0	FALSE	FALSE		TRUE	XX	0.811688312	0.031539889	1.078	14545.36	1365	21	130	0.047647705	460.4427564	FALSE	0.249014191	0.324158451	1.133076443	1.054700911	0.495072111	0.523397303	0.715417357	0.961544028	0.687229666	1.48466633	0.622741728	0.86309336	0.127394615	0.682898386	0.23712036	0.290539473	0.698504742
NE5412	Cr_CD_02_F_384	CROSS	Final	0	FALSE	FALSE		TRUE	XX	0.842618384	0.033426184	1.077	12627.03	1675	28	218	0.067375357	778.526754	FALSE	0.239644705	0.373563805	1.057097663	0.962142606	0.449036841	0.55238659	0.730417422	0.834321537	0.662705517	1.418702991	0.684959371	0.897202534	0.155381002	0.652172554	0.210025697	0.317256011	0.719488483
WJ3981	Cr_CD_02_F_385	CROSS	Final	0	FALSE	FALSE		TRUE	XX	0.905756732	0.037140204	1.077	14082.89	1373	23	219	0.014806721	33.29419678	FALSE	0.210468153	0.329193777	1.057524359	0.978705314	0.402332171	0.520063681	0.793800094	0.933118082	0.533981278	1.341059897	0.542857297	0.851671736	0.127814668	0.595048286	0.173046858	0.30263673	0.700282363
IS2260	Cr_CD_02_F_386	CROSS	Final	0	FALSE	FALSE		TRUE	XX	0.813543599	0.02690167	1.078	14534.79	1419	30	0	0.04764441	352.5587434	FALSE	0.190302007	0.358243872	1.03730418	1.113741465	0.399661735	0.571594026	0.647480907	0.849134986	0.618447123	1.351240571	0.552949107	0.765611256	0.165877852	0.625464767	0.17819313	0.253529608	0.672868268
FY9566	Cr_CD_02_F_393	CROSS	Final	0	FALSE	FALSE		TRUE	XX	0.860149673	0.02525725	1.069	17036.62	1319	27	13	0.022333626	71.55499196	FALSE	0.184543604	0.364274048	1.188322286	1.347567451	0.446626045	0.61690626	0.759129273	1.024381355	0.597712316	1.550659331	0.665624832	0.859207786	0.14028601	0.735122169	0.191528556	0.258501919	0.697673435
PR7892	Cr_CD_02_F_395	CROSS	Final	0	FALSE	FALSE		TRUE	XX	0.822490706	0.028810409	1.076	17608.83	1423	35	138	0.023910608	131.1161742	FALSE	0.228976061	0.344031988	1.144255618	1.075824033	0.384295884	0.542228033	0.697491067	0.799882892	0.643143326	1.689891033	0.550916857	1.131591516	0.175480166	0.676819617	0.213756422	0.20660092	0.881319318
ET5039	Cr_CD_02_F_396	CROSS	Final	0	FALSE	FALSE		TRUE	XX	0.864312268	0.023234201	1.076	17139.06	1223	11	11	0.026980013	62.49358186	FALSE	0.201877991	0.361688342	1.044105967	1.071178622	0.4733047	0.538594142	0.818772787	0.93558196	0.681950854	1.73755103	0.689535866	0.976365982	0.169087404	0.691286253	0.229067339	0.251005525	0.74315606
UY4935	Cr_CD_02_M_303	CROSS	Final	0	FALSE	FALSE		TRUE	XY	0.623062899	0.683682771	1.097	18092.46	1526	20	1	0.034140127	76.15167081	FALSE	0.217936036	0.39546851	1.040156798	1.037061587	0.465166035	0.555700964	0.744840481	0.831561668	0.601852775	1.437283457	0.670002695	0.892913177	0.160232454	0.622248007	0.199696398	0.245516579	0.737655169
HN2348	Cr_CD_02_M_304	CROSS	Final	0	FALSE	FALSE		TRUE	XY	0.612977451	0.681546249	1.0865	16763.58	1466	12	0	0.026299143	48.98784326	FALSE	0.233064742	0.38249581	1.094038232	0.97795326	0.423895075	0.58990971	0.574757817	0.90857668	0.668651829	1.454581694	0.681298291	0.862643778	0.152294417	0.683028231	0.196795645	0.264919509	0.724785416
QD2252	Cr_CD_02_M_305	CROSS	Final	0	FALSE	FALSE		TRUE	XY	0.64868603	0.682342093	1.0845	15961.51	1438	12	1	0.027990336	57.88869817	FALSE	0.239200376	0.392256039	1.022208837	0.902420696	0.447576608	0.562039438	0.659899833	0.840271201	0.601947935	1.454498673	0.680699866	0.847538682	0.139773714	0.684270956	0.164144836	0.256805223	0.702126406
KY0585	Cr_CD_02_M_306	CROSS	Final	0	FALSE	FALSE		TRUE	XY	0.655172414	0.703168686	1.073	16952.18	911	17	3	0.026339776	115.3430135	FALSE	0.196375877	0.305683327	1.118262994	1.051958853	0.352343982	0.469202081	0.538278726	0.8604791	0.584113529	1.261253419	0.602341269	0.705513816	0.139038132	0.627175827	0.15856364	0.28391622	0.609950908
DY1458	Cr_CD_02_M_308	CROSS	Final	0	FALSE	FALSE		TRUE	XY	0.635694572	0.669273229	1.087	16645.67	1254	13	0	0.029641994	59.13338219	FALSE	0.234235091	0.413080401	1.151650856	1.107795607	0.426116824	0.523259205	0.627069986	0.773955033	0.57246119	1.242244987	0.565852864	0.808138097	0.162504724	0.579069515	0.193143323	0.307887879	0.752087484
JI7117	Cr_CD_02_M_309	CROSS	Final	0	FALSE	FALSE		TRUE	XY	0.619731357	0.668364984	1.0795	15322.67	994	13	0	0.014699099	39.55003054	FALSE	0.222350219	0.389553408	1.100786954	0.933844816	0.436477331	0.528758872	0.621170939	0.924577505	0.612882568	1.224590407	0.547228233	0.700269403	0.14879909	0.563935499	0.140184406	0.227440715	0.630699302
CM4744	Cr_CD_02_M_312	CROSS	Final	0	FALSE	FALSE		TRUE	XY	0.642399267	0.66025641	1.092	18796.34	1616	16	2	0.032640018	70.45392768	FALSE	0.196155226	0.3476741	1.118728533	1.044884363	0.508130884	0.5229742	0.676355138	0.865700528	0.643848807	1.421393866	0.673588642	0.851336028	0.181365112	0.603734611	0.175406504	0.251963969	0.670236925
UZ1143	Cr_CD_02_M_313	CROSS	Final	0	FALSE	FALSE		TRUE	XY	0.648275862	0.697931034	1.0875	16864.18	1311	19	3	0.033163848	75.95296766	FALSE	0.207421867	0.337697979	1.065809215	1.1183466	0.387982068	0.564035677	0.567237729	0.90991668	0.594751665	1.383820499	0.708128054	0.822808983	0.159331777	0.634006461	0.179967229	0.266126169	0.735582692
VE6104	Cr_CD_02_M_318	CROSS	Final	0	FALSE	FALSE		TRUE	XY	0.665439485	0.681086056	1.0865	16019.67	1391	15	3	0.032783879	82.55260572	FALSE	0.180028726	0.339208077	1.205955253	0.943652651	0.448448809	0.536590473	0.59046176	0.852452246	0.628852074	1.190287011	0.631099312	0.767369322	0.109428001	0.592896268	0.208868279	0.228281917	0.65450804
IR6258	Cr_CD_02_M_319	CROSS	Final	0	FALSE	FALSE		TRUE	XY	0.644773358	0.69426457	1.081	16874.18	1244	23	2	0.030543598	109.9875654	FALSE	0.183831121	0.332638324	1.01237493	1.085741444	0.445651201	0.538692742	0.595939957	1.040998537	0.534248082	1.210428961	0.595880695	0.683055285	0.121961459	0.558308506	0.16208192	0.234618764	0.701959904
NP1913	Cr_CD_02_M_320	CROSS	Final	0	FALSE	FALSE		TRUE	XY	0.638356164	0.676255708	1.095	19425.19	1630	23	1	0.03572919	94.96791198	FALSE	0.27505524	0.418065433	1.224080761	1.09116056	0.391296066	0.563186287	0.78171698	0.911548407	0.63500026	1.478441222	0.714433207	0.899553672	0.137913717	0.779194482	0.245866335	0.254978216	0.774561323
FY5695	Cr_CD_02_M_321	CROSS	Final	0	FALSE	FALSE		TRUE	XY	0.633854646	0.668813247	1.087	17790.74	1421	10	0	0.02984955	80.50511078	FALSE	0.19937338	0.405660468	1.074154295	1.126091425	0.528870631	0.576648295	0.691370896	0.865450218	0.681590527	1.475542877	0.785296162	0.968031673	0.145412724	0.662085999	0.227534097	0.248668687	0.779281797
ZH1483	Cr_CD_02_M_322	CROSS	Final	0	FALSE	FALSE		TRUE	XY	0.628099174	0.694214876	1.089	15795.8	1566	16	1	0.029302658	54.77213807	FALSE	0.184226192	0.347497446	1.090543086	0.969055092	0.386811695	0.503868131	0.622633882	0.848263486	0.631623614	1.329720596	0.604844343	0.802111976	0.12129807	0.612947763	0.20828322	0.246268002	0.682016758
PG0940	Cr_CD_02_M_326	CROSS	Final	0	FALSE	FALSE		TRUE	XY	0.649907749	0.687730627	1.084	16952.47	1482	15	1	0.032073358	92.80545869	FALSE	0.170476602	0.320248259	0.961924547	0.940511742	0.427548238	0.558856513	0.582687844	0.90989674	0.48317434	1.284119425	0.623979755	0.728507277	0.152485126	0.581685041	0.174015908	0.236189728	0.708392217
VG3782	Cr_CD_02_M_329	CROSS	Final	0	FALSE	FALSE		TRUE	XY	0.629953917	0.680184332	1.085	17292.44	1131	15	2	0.018125412	33.92980625	FALSE	0.248374495	0.375655582	1.118003288	1.040628416	0.546076918	0.577304444	0.662312712	0.914156932	0.709558803	1.531363216	0.738531009	0.889753198	0.143183993	0.629234665	0.193668495	0.279081563	0.838343437
WI1438	Cr_CD_02_M_337	CROSS	Final	0	FALSE	FALSE		TRUE	XY	0.633010604	0.706777317	1.0845	15023.51	1294	31	3	0.01913244	44.17082313	FALSE	0.190767662	0.359037254	1.048889329	0.894997203	0.391785924	0.473258226	0.573035172	0.939860219	0.642659378	1.315138683	0.642326566	0.77338781	0.147369017	0.596265428	0.18444424	0.22058759	0.670815247
JT5104	Cr_CD_02_M_341	CROSS	Final	0	FALSE	FALSE		TRUE	XY	0.641224863	0.664990859	1.094	15364.73	1584	28	3	0.038208873	102.2559359	FALSE	0.162189626	0.307262128	0.933176106	0.85266705	0.428318591	0.470948689	0.567793859	0.720676456	0.542476136	1.137279905	0.603655209	0.628842763	0.121707304	0.511691348	0.143575568	0.220570081	0.656178093
WS4132	Cr_CD_02_M_343	CROSS	Final	0	FALSE	FALSE		TRUE	XY	0.534309241	0.616651418	1.093	15474.49	1270	41	2	0.061900944	537.4960971	FALSE	0.191605669	0.364341572	1.121846345	1.050050764	0.438851298	0.56189251	0.593169793	0.800931083	0.618114072	1.414780071	0.717244964	0.805066922	0.140360038	0.659343218	0.204594788	0.314582258	0.660894157
KV0089	Cr_CD_02_M_350	CROSS	Final	0	FALSE	FALSE		TRUE	XY	0.644578313	0.681186284	1.079	17308.7	1178	14	1	0.020306391	29.24918245	FALSE	0.210298818	0.384199763	1.095922603	1.042365733	0.42932157	0.57190879	0.674111705	0.903996044	0.576530742	1.425410009	0.641006973	0.699474667	0.14507152	0.590743245	0.180082806	0.261602485	0.712416132
QP3946	Cr_CD_02_M_355	CROSS	Final	0	FALSE	FALSE		TRUE	XY	0.611677479	0.590824838	1.079	14257.92	1293	45	2	0.039405886	305.1458592	FALSE	0.199959001	0.339249979	1.060322758	0.918717278	0.35994023	0.464373395	0.67057454	0.805026102	0.550220402	1.262666398	0.658511071	0.655214658	0.141956162	0.530441925	0.173096743	0.218895841	0.645605966
MV3317	Cr_CD_02_M_357	CROSS	Final	0	FALSE	FALSE		TRUE	XY	0.555	0.583181818	1.1	14573.96	1456	43	3	0.080004393	788.319434	FALSE	0.225470577	0.345136033	1.160562796	1.06628508	0.480445826	0.535544083	0.702897321	1.090643588	0.70749456	1.714015528	0.639427971	1.0561986	0.134692253	0.679156353	0.235145365	0.265816499	0.77556115
ZD9665	Cr_CD_02_M_358	CROSS	Final	0	FALSE	FALSE		TRUE	XY	0.668521094	0.702364395	1.0785	16581.08	1134	19	0	0.029471777	98.08621899	FALSE	0.235509404	0.40503999	1.288758121	1.207340017	0.435013914	0.611299186	0.761952834	1.105778471	0.641876208	1.743010831	0.778960171	0.885768661	0.170193992	0.777392119	0.200951943	0.253783246	0.780286984
EA2948	Cr_CD_02_M_361	CROSS	Final	0	FALSE	FALSE		TRUE	XY	0.659143252	0.688162137	1.0855	17051.92	1206	22	0	0.04894575	212.7159651	FALSE	0.229768845	0.378197877	1.096826622	0.899370854	0.387170473	0.607380277	0.650366639	0.849464451	0.610957587	1.467693946	0.633594334	0.986164598	0.186313328	0.692707911	0.203320211	0.252346947	0.692883845
FC3218	Cr_CD_02_M_363	CROSS	Final	0	FALSE	FALSE		TRUE	XY	0.652153987	0.706232814	1.091	16738.1	1401	25	1	0.038251702	98.28992033	FALSE	0.260662735	0.389530376	1.144932535	0.909362248	0.543490465	0.660409322	0.679527377	0.933439049	0.697331066	1.538644986	0.776730739	0.95052581	0.149120831	0.726964052	0.240529033	0.297226016	0.769501725
XH8639	Cr_CD_02_M_364	CROSS	Final	0	FALSE	FALSE		TRUE	XY	0.636614535	0.693652254	1.087	15693.49	1465	10	1	0.036568197	95.71198212	FALSE	0.23321775	0.353140102	0.993023339	0.927964507	0.503393505	0.59075458	0.684105401	0.880173985	0.679007745	1.261478634	0.651352963	0.75075725	0.14451854	0.603498719	0.212699686	0.225061501	0.733106617
TS2601	Cr_CD_02_M_367	CROSS	Final	0	FALSE	FALSE		TRUE	XY	0.638425926	0.663888889	1.08	16425.73	1075	19	2	0.021874588	64.35807022	FALSE	0.165654756	0.382327036	1.096511504	1.052373431	0.527465197	0.533431447	0.611662378	0.800086291	0.567706944	1.488031436	0.602286842	0.842885002	0.148973608	0.645694354	0.158166503	0.273716935	0.710288142
HL5606	Cr_CD_02_M_371	CROSS	Final	0	FALSE	FALSE		TRUE	XY	0.650742115	0.706864564	1.078	16437.4	1098	23	2	0.019733143	45.08110921	FALSE	0.216214213	0.380534581	1.120554189	1.038667771	0.385644878	0.502512493	0.605144282	0.827624692	0.559759981	1.328494589	0.581843763	0.75918322	0.149658684	0.535607747	0.163225305	0.225278906	0.701509873
XM7891	Cr_CD_02_M_372	CROSS	Final	0	FALSE	FALSE		TRUE	XY	0.630255941	0.665447898	1.094	13897.11	1684	23	3	0.041529761	125.6533039	FALSE	0.236739858	0.326398782	0.919615617	0.960631337	0.344963793	0.473191886	0.650063183	0.698130729	0.577314249	1.239394318	0.570694167	0.785918761	0.115635547	0.579185141	0.189823631	0.271423326	0.59695862
DE8180	Cr_CD_02_M_374	CROSS	Final	0	FALSE	FALSE		TRUE	XY	0.583140343	0.597962019	1.0795	14234.56	1077	36	1	0.033251702	168.4194021	FALSE	0.227474591	0.324000252	1.023424906	0.917555787	0.431063648	0.49548434	0.653620629	0.791524466	0.534473963	1.17861063	0.477499937	0.70771434	0.122167484	0.585968365	0.164248176	0.250587359	0.66795195
FP3910	Cr_CD_02_M_375	CROSS	Final	0	FALSE	FALSE		TRUE	XY	0.635277905	0.661920073	1.0885	15148.51	1251	18	0	0.029793543	65.9770959	FALSE	0.212166134	0.384856428	1.064329364	0.966563949	0.410601541	0.521701604	0.635376179	0.885103772	0.528434941	1.337491611	0.543882009	0.763903703	0.125556934	0.559593129	0.181998143	0.239957653	0.644552001
YQ1982	Cr_CD_02_M_378	CROSS	Final	0	FALSE	FALSE		TRUE	XY	0.642460685	0.66466235	1.081	14847.55	1125	17	0	0.016225566	38.4407042	FALSE	0.1701291	0.417712066	1.027913828	1.069267457	0.489104326	0.500958135	0.64414676	0.769689374	0.599021464	1.373021314	0.648996045	0.729884822	0.124060888	0.659704884	0.176123356	0.23586386	0.697556252
UW3326	Cr_CD_02_M_379	CROSS	Final	0	FALSE	FALSE		TRUE	XY	0.640883978	0.667587477	1.086	15659.18	1378	20	3	0.021653855	45.17781119	FALSE	0.25569671	0.324793573	1.034537138	0.992006167	0.492235325	0.58195907	0.65629248	0.858601965	0.57780815	1.311052312	0.6242346	0.854259463	0.159650793	0.644414461	0.20946184	0.26980984	0.670277889
ZN2882	Cr_CD_02_M_379_cg109	CROSS	Final	0	FALSE	FALSE		TRUE	XY	0.640767824	0.682358318	1.094	13500.19	1585	22	2	0.03019877	53.913998	FALSE	0.214663567	0.351772699	1.07465115	0.979911778	0.385920354	0.485992983	0.735544935	0.71198972	0.565621463	1.236945103	0.599695045	0.72702654	0.126887057	0.623398407	0.182589956	0.246589032	0.694064053
PH6400	Cr_CD_02_M_381	CROSS	Final	0	FALSE	FALSE		TRUE	XY	0.642066421	0.688191882	1.084	14828.51	1247	20	1	0.020143861	56.72382388	FALSE	0.174933339	0.322891606	1.035033495	1.139427022	0.419866988	0.487776731	0.642141578	0.938058113	0.484674598	1.273628003	0.560541987	0.634858309	0.101426269	0.612401562	0.218160891	0.271841283	0.707556126
MN5274	Cr_CD_02_M_387	CROSS	Final	0	FALSE	FALSE		TRUE	XY	0.541743119	0.598623853	1.09	15368.39	1364	24	0	0.075379969	1022.885509	FALSE	0.154017452	0.259168362	0.782059889	0.931132126	0.314086287	0.475716769	0.619062966	0.67072746	0.558158726	1.224006039	0.435764629	0.781929752	0.121027656	0.534018264	0.172757218	0.234116938	0.589326601
IP6235	Cr_CD_02_M_388	CROSS	Final	0	FALSE	FALSE		TRUE	XY	0.647304833	0.663104089	1.076	15834.34	939	26	2	0.016766967	40.6952829	FALSE	0.231395862	0.369513426	1.138348914	1.152053309	0.451739794	0.501883984	0.675367727	0.907395129	0.642401395	1.359577	0.592446666	0.812095905	0.141780489	0.710860215	0.170199741	0.309643535	0.764667331
YX5473	Cr_CD_02_M_389	CROSS	Final	0	FALSE	FALSE		TRUE	XY	0.619375574	0.629476584	1.089	15821.66	1108	26	1	0.037359982	115.8395383	FALSE	0.225956126	0.375814021	1.05172306	0.987064846	0.454440433	0.502412657	0.651701711	0.859581347	0.569788665	1.367303183	0.618961775	0.753713792	0.151690826	0.683809603	0.168060794	0.271842601	0.756621199
GV4319	Cr_CD_02_M_397	CROSS	Final	0	FALSE	FALSE		TRUE	XY	0.623268698	0.627885503	1.083	14674.38	1184	29	0	0.019641994	32.9398145	FALSE	0.224677318	0.355517612	1.11929783	1.053332515	0.3947697	0.597231427	0.782384072	0.831926204	0.714374378	1.553455911	0.696997151	0.983346587	0.146173141	0.747016305	0.196737463	0.282260677	0.716078027
FH3636	Cr_CD_03_F_485	CROSS	Final	0	FALSE	FALSE		TRUE	XX	0.774720149	0.041977612	1.072	13255.89	1235	25	99	0.059853942	720.4685992	FALSE	0.226012767	0.386394323	1.086837761	1.049043237	0.52361636	0.527916336	0.662271723	0.92834216	0.742764253	1.755144538	0.63345434	1.003252266	0.159099107	0.720359116	0.202702371	0.273538816	0.709571457
HN9960	Cr_CD_03_F_501	CROSS	Final	0	FALSE	FALSE		TRUE	XX	0.815348837	0.040930233	1.075	11251.71	1509	28	220	0.063292335	745.9187372	FALSE	0.253117145	0.442510627	1.374191469	1.236878972	0.495302616	0.73357757	0.853825989	1.535589199	0.755352043	1.665525037	0.866268545	0.985361584	0.16139773	0.699804917	0.24760687	0.363767021	0.78014828
SD6207	Cr_CD_03_F_502	CROSS	Final	0	FALSE	FALSE		TRUE	XX	0.868347339	0.029878618	1.071	12966.65	1171	16	0	0.010607292	21.83086041	FALSE	0.250720151	0.433496761	1.175168767	1.050618461	0.433265398	0.610874905	0.810001152	0.868998665	0.633317096	1.384937703	0.658998367	0.863523079	0.185244479	0.606016286	0.228046597	0.343650874	0.801363608
MX7949	Cr_CD_03_F_503	CROSS	Final	0	FALSE	FALSE		TRUE	XX	0.792513863	0.037892791	1.082	14475.12	1130	25	1	0.050175708	372.7733434	FALSE	0.233711415	0.404210904	1.139334511	1.00696943	0.378580713	0.580168035	0.722135802	0.887177649	0.763655329	1.574909584	0.691946063	0.965726239	0.17678614	0.802342409	0.2042816	0.257821756	0.738646895
RA1770	Cr_CD_03_F_504	CROSS	Final	0	FALSE	FALSE		TRUE	XX	0.811329588	0.033707865	1.068	13514.13	1239	29	146	0.066307929	945.8205534	FALSE	0.268829809	0.459075182	1.31625231	1.108321739	0.482162135	0.711255746	0.71865541	0.934059642	0.713253655	1.699332938	0.732936762	1.068881528	0.149103238	0.770231071	0.199864936	0.299168433	0.790950132
PM6441	Cr_CD_03_F_505	CROSS	Final	0	FALSE	FALSE		TRUE	XX	0.834572491	0.038568773	1.076	10707.1	1482	14	220	0.048339556	387.8830513	FALSE	0.235731468	0.3885273	1.050611442	0.98691538	0.454091282	0.606420135	0.68795483	0.95758904	0.71588023	1.419618981	0.654052087	0.823752593	0.10329596	0.646020032	0.241335227	0.324270862	0.805353584
EH1981	Cr_CD_03_F_509	CROSS	Final	0	FALSE	FALSE		TRUE	XX	0.909430439	0.031746032	1.071	12297.43	1538	21	179	0.007936525	16.1156547	FALSE	0.249726967	0.425373418	1.170976336	0.990694771	0.468146581	0.520840516	0.730965714	0.938895332	0.65973132	1.38012572	0.678190461	0.785936548	0.152308241	0.627122882	0.217931707	0.281196956	0.756499504
FQ2521	Cr_CD_03_F_510	CROSS	Final	0	FALSE	FALSE		TRUE	XX	0.849021435	0.02749301	1.073	12342.68	1385	26	0	0.020191083	68.27158646	FALSE	0.238602939	0.410283628	1.028544757	0.971425887	0.483282354	0.53869981	0.719697761	0.829479419	0.520470384	1.214890007	0.55863065	0.688181108	0.112779386	0.607161435	0.20846362	0.256751346	0.678053649
FM1793	Cr_CD_03_F_511	CROSS	Final	0	FALSE	FALSE		TRUE	XX	0.837465565	0.034894399	1.089	15138.12	1722	13	141	0.044238963	199.8279469	FALSE	0.243293016	0.449130931	1.062681171	0.924222805	0.48136742	0.642880161	0.747648753	0.78569838	0.649287824	1.588109531	0.609784913	0.864902379	0.14156311	0.635877973	0.219974408	0.264563815	0.796994364
TJ3875	Cr_CD_03_M_499	CROSS	Final	0	FALSE	FALSE		TRUE	XY	0.618475751	0.646189376	1.0825	17109.88	1242	29	3	0.018871074	42.9843005	FALSE	0.228639835	0.44775301	1.279260917	1.182007163	0.539162187	0.653598996	0.70462215	0.934723129	0.765873312	1.739287538	0.681068506	0.978382116	0.174402164	0.786037101	0.216190887	0.298073404	0.80427218
PI7042	Cr_CD_03_M_506	CROSS	Final	0	FALSE	FALSE		TRUE	XY	0.58780037	0.639556377	1.082	11351.05	1093	19	0	0.041438612	220.4046162	FALSE	0.180247708	0.386748502	1.025456166	0.908638737	0.385338941	0.505415981	0.735615033	0.878333159	0.593601688	1.309923345	0.672449048	0.749798748	0.131794023	0.597918471	0.185445466	0.281207567	0.682051687
JT8857	Cr_CD_03_M_507	CROSS	Final	0	FALSE	FALSE		TRUE	XY	0.617539027	0.660238751	1.089	14924.41	1327	21	1	0.02762025	52.00700453	FALSE	0.207981436	0.333078518	1.13726447	0.953002566	0.458309608	0.547894395	0.732692334	0.748304342	0.685655295	1.566762217	0.682104066	0.975985051	0.160944397	0.752257598	0.211733679	0.250663193	0.626557477
QM5104	Cr_CD_03_M_508	CROSS	Final	0	FALSE	FALSE		TRUE	XY	0.540092166	0.579262673	1.085	13304.91	1075	40	0	0.081366132	1188.376549	FALSE	0.272981875	0.42660934	1.281406385	1.264645659	0.5566365	0.615486943	0.772421457	1.194145384	0.787453498	1.779042122	0.648557434	1.041269521	0.167607264	0.804815507	0.248179007	0.334011964	0.810151881
LC1866	Cr_CD_04_F_523	CROSS	Final	0	FALSE	FALSE		TRUE	XX	0.73627907	0.065116279	1.075	9151.85	1757	40	0	0.097017351	2113.194556	FALSE	0.194496279	0.391614979	1.25930877	1.19899307	0.479029037	0.638450425	0.730890791	0.996848062	0.626212457	1.442004151	0.646208422	0.833493041	0.146309279	0.606872096	0.201707938	0.318077903	0.689915451
EX4824	Cr_CD_04_F_525	CROSS	Final	0	FALSE	FALSE		TRUE	XX	0.929104478	0.027985075	1.072	12551.77	1690	11	210	0.016992093	37.47628354	FALSE	0.211125586	0.357081086	1.046226868	0.994202337	0.403927065	0.541357872	0.68516228	0.871191807	0.602305447	1.212418556	0.657676119	0.704920449	0.183081735	0.552671016	0.152886793	0.242674919	0.700936947
RA4952	Cr_CD_04_F_533	CROSS	Final	0	FALSE	FALSE		TRUE	XX	0.877349624	0.027255639	1.064	13529.49	1234	15	219	0.023338458	75.85267047	FALSE	0.205033581	0.385602088	1.119110832	1.107876115	0.442514798	0.5281056	0.751839072	0.873499228	0.68043949	1.336783469	0.708895845	0.84267767	0.170220741	0.693891585	0.224176947	0.26475497	0.632544119
JA0654	Cr_CD_04_F_534	CROSS	Final	0	FALSE	FALSE		TRUE	XX	0.871119473	0.028222013	1.063	12065.81	894	19	28	0.018987481	55.87037797	FALSE	0.178686671	0.373451828	1.097563816	0.930065782	0.440335011	0.524374105	0.710354109	0.763313656	0.638498198	1.397833673	0.572941075	0.707370473	0.129373791	0.583466682	0.187886217	0.275737734	0.655902744
EM7931	Cr_CD_04_F_535	CROSS	Final	0	FALSE	FALSE		TRUE	XX	0.854341737	0.029878618	1.071	12538.53	1358	14	1	0.013351636	38.31655623	FALSE	0.209753462	0.4228566	1.20181556	0.933682047	0.413764624	0.53881916	0.759738206	0.681339858	0.577499932	1.297042037	0.672247883	0.777124614	0.10256386	0.573671731	0.180802699	0.266378922	0.625192924
QS9722	Cr_CD_04_F_540	CROSS	Final	0	FALSE	FALSE		TRUE	XX	0.896182495	0.026536313	1.074	15443.32	1670	20	178	0.022366571	64.35024498	FALSE	0.178200002	0.362033507	1.194950158	1.050680679	0.395834524	0.479301022	0.624088524	0.989748193	0.605633945	1.410318328	0.702504295	0.776840633	0.145305525	0.691237289	0.155795496	0.216857488	0.718174499
VI7097	Cr_CD_04_F_541	CROSS	Final	0	FALSE	FALSE		TRUE	XX	0.882048872	0.031954887	1.064	12247.49	1225	16	24	0.017273226	45.52282424	FALSE	0.205184827	0.385956498	1.053684918	1.037273398	0.37942455	0.516187218	0.664462446	1.000531188	0.577179286	1.381588725	0.586977208	0.728067293	0.130883915	0.592121118	0.183955995	0.282180169	0.681853758
IN0611	Cr_CD_04_F_542	CROSS	Final	0	FALSE	FALSE		TRUE	XX	0.907943925	0.031775701	1.07	12952.32	1690	12	179	0.017316055	48.40467838	FALSE	0.242659265	0.41498363	1.139332731	0.979670192	0.459145609	0.536815103	0.673547384	0.929872157	0.569936588	1.212292644	0.582598414	0.70767255	0.140901419	0.579432957	0.165684627	0.276861637	0.673779003
GH9683	Cr_CD_04_F_543	CROSS	Final	0	FALSE	FALSE		TRUE	XX	0.855955679	0.027239151	1.083	16216.21	1597	28	28	0.030634746	63.34405029	FALSE	0.25234005	0.36747174	1.081941882	1.049011875	0.466570093	0.566285113	0.737656813	0.875111841	0.577508448	1.478890294	0.656256797	0.934805186	0.209111708	0.638681794	0.177538369	0.227426712	0.797720158
DQ6585	Cr_CD_04_F_544	CROSS	Final	0	FALSE	FALSE		TRUE	XX	0.846938776	0.029684601	1.078	14517.74	1495	18	0	0.010184494	16.73543179	FALSE	0.20003108	0.339859969	0.963923876	0.987756781	0.377055831	0.500146582	0.698180107	0.846894673	0.633431754	1.344217125	0.641697501	0.82705688	0.195898207	0.603881708	0.156911433	0.280415471	0.653269547
PK0174	Cr_CD_04_F_551	CROSS	Final	0	FALSE	FALSE		TRUE	XX	0.84729292	0.033317908	1.0805	12020.32	1495	16	1	0.018688777	47.23514289	FALSE	0.221208808	0.383850109	1.026844797	0.908295511	0.391753394	0.503896859	0.677769145	0.720280503	0.484180241	1.232662996	0.537090659	0.649067739	0.14650196	0.57802136	0.199245993	0.303985327	0.730346793
CA9124	Cr_CD_04_F_552	CROSS	Final	0	FALSE	FALSE		TRUE	XX	0.866297833	0.027201475	1.0845	16852.15	1856	13	141	0.026870195	68.68624468	FALSE	0.240859515	0.378349413	1.018445886	1.05363428	0.482609124	0.59232808	0.736879392	0.778773163	0.702521753	1.601279626	0.659085151	1.055473808	0.16988933	0.68104081	0.173627726	0.239850741	0.763344862
MA6368	Cr_CD_04_F_553	CROSS	Final	0	FALSE	FALSE		TRUE	XX	0.868101029	0.031805426	1.069	14496.4	1356	14	2	0.019151109	73.81913583	FALSE	0.205844201	0.321804021	1.017700906	0.982864672	0.421139024	0.601597614	0.576901828	0.872561428	0.548756911	1.372133716	0.694931127	0.825929163	0.128514661	0.612634836	0.184114669	0.220537504	0.680927651
JF5744	Cr_CD_04_F_555	CROSS	Final	0	FALSE	FALSE		TRUE	XX	0.897100094	0.028531338	1.069	10979.51	1466	17	179	0.010601801	43.05538645	FALSE	0.191356497	0.365681263	0.98365072	0.817340886	0.44592166	0.54292055	0.664237473	0.920259896	0.58736699	1.279474567	0.618789166	0.727263982	0.137164628	0.546108307	0.138075416	0.237988827	0.687098244
ZD9676	Cr_CD_04_F_561	CROSS	Final	0	FALSE	FALSE		TRUE	XX	0.841004184	0.041841004	1.0755	12150.53	1337	20	0	0.01842192	62.32058634	FALSE	0.203118795	0.444013736	1.086372811	0.9837435	0.49611025	0.562938638	0.818400851	0.907121297	0.635281191	1.53071575	0.649766162	0.741943249	0.139006339	0.635610395	0.167729378	0.328298571	0.737498997
VU2326	Cr_CD_04_F_562	CROSS	Final	0	FALSE	FALSE		TRUE	XX	0.849340866	0.039548023	1.062	15229.11	965	14	1	0.012042609	16.76685291	FALSE	0.257664398	0.439946858	1.086537411	0.922772118	0.564576579	0.557025253	0.660576924	0.857436726	0.578497286	1.422472952	0.643241704	0.742393906	0.175650425	0.697611256	0.178079982	0.248799798	0.779559566
TF8774	Cr_CD_04_F_568	CROSS	Final	0	FALSE	FALSE		TRUE	XX	0.877560521	0.030726257	1.074	15196.34	1185	39	124	0.020008785	64.24890741	FALSE	0.284344871	0.373313689	1.181666477	1.042619795	0.456425833	0.624558475	0.853166223	0.931606187	0.740244261	1.81767508	0.660751411	1.188049594	0.234135397	0.771501797	0.295268557	0.3093509	0.788611185
GI8467	Cr_CD_04_F_569	CROSS	Final	0	FALSE	FALSE		TRUE	XX	0.895273401	0.037998146	1.079	11927.94	1620	22	124	0.014394904	21.78575048	FALSE	0.26383436	0.459677087	1.161726317	1.043684125	0.433520011	0.55449649	0.777670009	0.954649461	0.638920132	1.45884388	0.608152032	0.934696306	0.200453751	0.665999413	0.213951473	0.348509512	0.778843724
JR5472	Cr_CD_04_F_570	CROSS	Final	0	FALSE	FALSE		TRUE	XX	0.892589118	0.038461538	1.066	11549.78	1677	25	138	0.007440149	25.86062273	FALSE	0.234723035	0.409271777	1.074046201	0.945299187	0.453168707	0.507715189	0.779062291	0.771616263	0.53247756	1.360285358	0.605292784	0.726420607	0.130651811	0.567196829	0.19818555	0.287018392	0.704775177
NE2698	Cr_CD_04_F_572	CROSS	Final	0	FALSE	FALSE		TRUE	XX	0.893925234	0.03364486	1.07	14933.75	1528	17	220	0.012787173	30.36149096	FALSE	0.214413729	0.416573331	1.108094436	1.133138388	0.444295781	0.555654317	0.771072482	0.859462901	0.601724474	1.329472259	0.608956418	0.864685971	0.145308492	0.612840239	0.184012782	0.233431061	0.854909455
RR3536	Cr_CD_04_F_579	CROSS	Final	0	FALSE	FALSE		TRUE	XX	0.850704225	0.0342723	1.065	13836.29	1097	16	0	0.008195695	19.84338803	FALSE	0.220001238	0.35854998	1.009230382	0.962469278	0.386086272	0.52803188	0.677566229	0.857094178	0.582959915	1.184927822	0.538656118	0.791541904	0.140716955	0.570962476	0.175480619	0.27796477	0.762487864
PP7960	Cr_CD_04_F_588	CROSS	Final	0	FALSE	FALSE		TRUE	XX	0.828557784	0.036294174	1.047	9469.57	1370	43	11	0.053800791	583.9072291	FALSE	0.191877746	0.336762869	0.957276704	0.811863574	0.350174247	0.49579858	0.562010658	0.63899408	0.481859195	0.961395158	0.407832612	0.581335715	0.095146863	0.435816984	0.149003577	0.317860218	0.655151094
IC4785	Cr_CD_04_F_590	CROSS	Final	0	FALSE	FALSE		TRUE	XX	0.861531191	0.029300567	1.058	12880.45	1571	29	178	0.033269273	254.9657738	FALSE	0.252165174	0.329103501	0.915108037	0.828697988	0.407361659	0.49027804	0.648347096	0.727692172	0.482980156	1.107492674	0.470946412	0.782736848	0.14448257	0.536006269	0.175537395	0.285083288	0.688873642
KT6223	Cr_CD_04_F_591	CROSS	Final	0	FALSE	FALSE		TRUE	XX	0.866383381	0.03210576	1.059	11418.51	987	25	71	0.014811114	33.10689905	FALSE	0.220781876	0.356351231	0.996539851	0.936374382	0.426588067	0.499627371	0.702543518	0.911765216	0.559530109	1.343345178	0.595436721	0.689932415	0.150632617	0.647632674	0.174803897	0.276918799	0.601742272
KP1928	Cr_CD_04_F_592	CROSS	Final	0	FALSE	FALSE		TRUE	XX	0.825458052	0.037608486	1.037	8786.28	2097	57	175	0.082521414	1320.847816	FALSE	0.237074267	0.285217529	0.761869966	0.559281299	0.276681489	0.420428392	0.72715674	0.474489975	0.42065602	0.866578716	0.315378201	0.57965398	0.107098841	0.424867132	0.211579962	0.291477291	0.516487288
SX7519	Cr_CD_04_F_598	CROSS	Final	0	FALSE	FALSE		TRUE	XX	0.807369403	0.031716418	1.072	11891.01	2875	47	177	0.070986163	1356.325876	FALSE	0.171474043	0.270792751	0.729794873	0.662685366	0.319232696	0.438902909	0.689596446	0.579008724	0.405179961	0.932973534	0.334790665	0.603649182	0.098898222	0.374064024	0.179799659	0.260112416	0.566562349
MQ1750	Cr_CD_04_F_599	CROSS	Final	0	FALSE	FALSE		TRUE	XX	0.792220114	0.041745731	1.054	9966.72	2862	69	176	0.08731935	1937.869691	FALSE	0.189430474	0.2879584	0.700832552	0.546518956	0.336419692	0.449596373	0.669327696	0.459529433	0.437857302	0.770464305	0.360800839	0.5980906	0.128026104	0.411369143	0.177992405	0.249129166	0.600598949
AP1379	Cr_CD_04_F_600	CROSS	Final	0	FALSE	FALSE		TRUE	XX	0.823584906	0.043867925	1.06	11967.77	2855	63	177	0.075056007	1618.801349	FALSE	0.212571017	0.284932063	0.81844855	0.628772367	0.276242053	0.511373673	0.608300709	0.470931702	0.500093371	0.893483445	0.358964264	0.651249413	0.082972885	0.442104265	0.219422756	0.307074877	0.543877653
EU3265	Cr_CD_04_F_602	CROSS	Final	0	FALSE	FALSE		TRUE	XX	0.836856618	0.027113971	1.088	15937.03	2893	29	179	0.057417088	625.3319193	FALSE	0.241701277	0.261717556	0.649995724	0.633681515	0.320574202	0.480014218	0.636128647	0.499465775	0.497583366	1.042791673	0.351633945	0.792870544	0.163204834	0.45441346	0.188429111	0.227520465	0.580472096
CL5198	Cr_CD_04_F_603	CROSS	Final	0	FALSE	FALSE		TRUE	XX	0.858363309	0.018884892	1.112	20040.37	2922	11	179	0.04965078	181.3325847	FALSE	0.205385462	0.330932066	1.032366332	1.001129378	0.41526186	0.526836663	0.702232654	0.863507147	0.742201983	1.438995615	0.590957246	0.916999182	0.166064824	0.645447267	0.198399562	0.266561987	0.679528479
MI9107	Cr_CD_04_F_605	CROSS	Final	0	FALSE	FALSE		TRUE	XX	0.848826715	0.023465704	1.108	17051.66	2906	8	178	0.045630354	132.654819	FALSE	0.228716797	0.365595004	1.096609075	1.02881507	0.386707323	0.625569763	0.626625379	0.807194358	0.659173539	1.493520686	0.575076132	0.936741898	0.154061289	0.662457677	0.166435454	0.229831059	0.699756109
UW5863	Cr_CD_04_F_612	CROSS	Final	0	FALSE	FALSE		TRUE	XX	0.842566944	0.024007387	1.083	19071.31	1395	25	102	0.020398638	47.16735572	FALSE	0.242301106	0.369193268	1.132958235	1.003444335	0.446586999	0.517636122	0.746461491	0.801308268	0.721083059	1.60188245	0.659052717	1.037579375	0.157514071	0.693816975	0.19778398	0.255252496	0.87046974
KV0245	Cr_CD_04_F_614	CROSS	Final	0	FALSE	FALSE		TRUE	XX	0.842226311	0.028058878	1.087	16268.82	1804	11	82	0.021496815	41.92892389	FALSE	0.270947774	0.383309963	1.167878335	1.092580916	0.490631835	0.611169173	0.798091174	0.938359508	0.775163878	1.49506867	0.709393887	1.022446749	0.188704552	0.831959645	0.224601444	0.291293444	0.802639752
ER1533	Cr_CD_04_F_615	CROSS	Final	0	FALSE	FALSE		TRUE	XX	0.865526802	0.031885397	1.082	14816.68	1702	19	65	0.02974083	61.79992632	FALSE	0.236490223	0.37518526	1.13588198	1.073182375	0.526771174	0.671337971	0.726748495	0.887715727	0.664656313	1.57437427	0.6528453	0.978559289	0.169808619	0.685173729	0.208953691	0.331113309	0.778109528
EB3043	Cr_CD_04_F_626	CROSS	Final	0	FALSE	FALSE		TRUE	XX	0.898225957	0.026610644	1.071	16731.48	1341	22	148	0.032152427	144.9213	FALSE	0.224905409	0.394824644	1.113589579	1.020053314	0.501151171	0.507785373	0.721215406	0.801005128	0.602935363	1.303710256	0.657742235	0.834534741	0.14481685	0.593671387	0.180916469	0.259451071	0.728208213
AX9483	Cr_CD_04_F_632	CROSS	Final	0	FALSE	FALSE		TRUE	XX	0.834733894	0.030812325	1.071	16186.87	1172	23	0	0.028800791	108.5564017	FALSE	0.25520683	0.424665154	1.095641039	1.06784073	0.531665451	0.620441102	0.677771516	0.89263701	0.64546138	1.35881729	0.647808961	0.855075704	0.15351948	0.659052642	0.190463001	0.276829292	0.765002706
GR0328	Cr_CD_04_F_633	CROSS	Final	0	FALSE	FALSE		TRUE	XX	0.886005561	0.033364226	1.079	16694.21	1482	18	162	0.026707665	76.13625572	FALSE	0.202465403	0.40870457	1.176216172	1.115716155	0.446382304	0.523714504	0.650045727	0.89054827	0.556061047	1.325609284	0.68173336	0.793927946	0.138311425	0.667357118	0.182877774	0.239783731	0.74600714
JM1088	Cr_CD_04_F_641	CROSS	Final	0	FALSE	FALSE		TRUE	XX	0.89471243	0.027829314	1.078	16991.6	1876	18	163	0.035298704	118.3967716	FALSE	0.218343122	0.368005267	1.08765478	1.005202296	0.457814324	0.442983471	0.693930929	0.852244406	0.590762333	1.399043852	0.730066422	0.808870044	0.139892615	0.612066972	0.186739279	0.247887124	0.688516491
BE2845	Cr_CD_04_F_642	CROSS	Final	0	FALSE	FALSE		TRUE	XX	0.878717472	0.023234201	1.076	19217.33	1583	17	90	0.041057544	187.1002419	FALSE	0.198258545	0.42399229	1.184867997	1.117324797	0.455318181	0.543571853	0.713886871	0.999826688	0.670800762	1.642423741	0.806719743	1.012159306	0.148876036	0.672726107	0.201744981	0.29749189	0.84683978
KM6387	Cr_CD_04_F_643	CROSS	Final	0	FALSE	FALSE		TRUE	XX	0.881585082	0.028904429	1.0725	17141.92	1341	21	138	0.024123655	74.74206089	FALSE	0.247055173	0.436940554	1.17093068	1.063124786	0.480751282	0.661361156	0.746299133	0.973286542	0.628167674	1.580511405	0.741865557	0.917225144	0.147591402	0.736381924	0.230895956	0.266422898	0.780542671
FY2904	Cr_CD_04_M_519	CROSS	Final	0	FALSE	FALSE		TRUE	XY	0.661141805	0.696132597	1.086	13034.14	1393	23	1	0.032648803	101.9831526	FALSE	0.236916214	0.379311451	1.143688471	1.002981108	0.513881088	0.5740308	0.668858663	0.94206418	0.531987379	1.340556024	0.646609407	0.717346697	0.143546061	0.625894583	0.181906847	0.261850725	0.711822743
ZK8562	Cr_CD_04_M_521	CROSS	Final	0	FALSE	FALSE		TRUE	XY	0.627281022	0.678375912	1.096	14723.97	1514	18	2	0.033379091	70.74314228	FALSE	0.213461485	0.323689926	0.92841823	0.82260436	0.417957995	0.479626155	0.678553514	0.632709893	0.584896693	1.27669392	0.595491664	0.817374792	0.12836214	0.578444628	0.187177809	0.241646822	0.666056882
QG7866	Cr_CD_04_M_522	CROSS	Final	0	FALSE	FALSE		TRUE	XY	0.629852126	0.67051756	1.082	15195.65	1335	21	1	0.019417966	35.08244253	FALSE	0.209467789	0.394783936	1.031215916	0.956918356	0.452037149	0.541799658	0.660649431	0.830632246	0.625902653	1.326431909	0.643144426	0.827934106	0.132669514	0.648474897	0.170377665	0.305482086	0.687433405
HQ4305	Cr_CD_04_M_529	CROSS	Final	0	FALSE	FALSE		TRUE	XY	0.647358665	0.693697868	1.079	15190.01	1230	19	1	0.022743246	52.70520014	FALSE	0.189795841	0.351810257	0.995391297	0.859775816	0.441606139	0.516392152	0.692033949	0.716457903	0.67676075	1.288149571	0.541079436	0.877879825	0.146938715	0.729163625	0.186372537	0.2363396	0.668597488
PA3975	Cr_CD_04_M_539	CROSS	Final	0	FALSE	FALSE		TRUE	XY	0.638504155	0.717913204	1.083	15416.91	1308	18	2	0.024508017	67.91872149	FALSE	0.20717507	0.352599775	0.954406382	0.84342437	0.433290379	0.468835757	0.61659556	0.821630124	0.552769552	1.313687132	0.598044505	0.806581715	0.151132722	0.643124866	0.218655968	0.246871734	0.645978874
CP7818	Cr_CD_04_M_549	CROSS	Final	0	FALSE	FALSE		TRUE	XY	0.637327189	0.653456221	1.085	11843.53	1520	19	0	0.021293653	49.11897879	FALSE	0.185079912	0.388566495	1.147968288	0.937726964	0.495882447	0.518933002	0.696329396	0.907921668	0.581161057	1.349259579	0.626417824	0.73618237	0.126144794	0.64989055	0.154345839	0.260057541	0.669225997
XM4835	Cr_CD_04_M_557	CROSS	Final	0	FALSE	FALSE		TRUE	XY	0.620498615	0.661588181	1.083	12408.33	1407	20	0	0.01824072	33.26764573	FALSE	0.169160555	0.36676974	0.988771246	0.928408571	0.370154563	0.491685824	0.596615334	0.772867899	0.606930985	1.26511786	0.498536061	0.772142579	0.153445305	0.611202309	0.164728048	0.27924789	0.581383631
ET7775	Cr_CD_04_M_558	CROSS	Final	0	FALSE	FALSE		TRUE	XY	0.648062731	0.719095941	1.084	16962.72	1304	14	2	0.035339337	100.4498946	FALSE	0.202267138	0.324889011	1.145217553	0.955094696	0.426936349	0.438785867	0.710499431	0.812900486	0.691398716	1.375899952	0.645710278	1.001195805	0.161235973	0.638635939	0.220719372	0.221132042	0.699239442
UG0670	Cr_CD_04_M_559	CROSS	Final	0	FALSE	FALSE		TRUE	XY	0.613051471	0.645220588	1.088	19487.89	1260	46	3	0.025589721	77.14499156	FALSE	0.215364527	0.328306467	1.191047422	1.060042982	0.397323691	0.546955085	0.804037829	0.926575473	0.701666557	1.810509078	0.678883176	1.0977074	0.212439633	0.718651465	0.226089136	0.300083811	0.777713788
EJ4846	Cr_CD_04_M_560	CROSS	Final	0	FALSE	FALSE		TRUE	XY	0.620515179	0.677552898	1.087	12130.37	1374	13	0	0.023244015	38.35628298	FALSE	0.268417307	0.481518886	1.246458749	1.07548286	0.490669476	0.582092938	0.832621254	0.893707626	0.693466336	1.626661643	0.745896743	1.047371588	0.169821761	0.690993203	0.291170126	0.365116786	0.872933313
GU2842	Cr_CD_04_M_574	CROSS	Final	0	FALSE	FALSE		TRUE	XY	0.604032997	0.661778185	1.091	14369.15	1362	31	4	0.029200527	60.11014987	FALSE	0.248240189	0.309552106	1.083849932	0.879244898	0.391950868	0.560228069	0.78946922	0.703242813	0.611379328	1.59522333	0.53886285	1.107650926	0.186371524	0.640121464	0.271066873	0.291179409	0.785780762
AX0971	Cr_CD_04_M_576	CROSS	Final	0	FALSE	FALSE		TRUE	XY	0.626611418	0.656537753	1.086	10706.01	1697	18	0	0.034824292	107.7342346	FALSE	0.225013804	0.409956657	1.039135977	0.909862791	0.414720336	0.546889092	0.679711686	0.746496605	0.577993117	1.254715828	0.530823349	0.715485985	0.128525942	0.622547532	0.198299836	0.335045461	0.758732723
SB2383	Cr_CD_04_M_577	CROSS	Final	0	FALSE	FALSE		TRUE	XY	0.582242991	0.614953271	1.07	10110.71	1300	34	0	0.042613661	381.0073187	FALSE	0.185743594	0.336573722	0.902804859	0.810526492	0.416093344	0.453776149	0.614298968	0.641596748	0.434291864	1.056602137	0.421038594	0.651289438	0.105630542	0.50639361	0.174765139	0.317188342	0.610046053
VZ4146	Cr_CD_04_M_583	CROSS	Final	0	FALSE	FALSE		TRUE	XY	0.598880597	0.664645522	1.072	11616.78	1437	23	2	0.031486932	204.4622638	FALSE	0.294315706	0.325994027	0.902573903	0.877610009	0.38616562	0.521745391	0.800221937	0.654054031	0.632533433	1.368882233	0.486968104	0.945442936	0.190844668	0.517441272	0.245765235	0.303268275	0.691069461
IU9915	Cr_CD_04_M_584	CROSS	Final	0	FALSE	FALSE		TRUE	XY	0.626629423	0.656424581	1.074	10045.1	1234	27	0	0.02661432	139.7263733	FALSE	0.196015915	0.355994368	0.951607988	0.906411835	0.385859668	0.507112783	0.642103936	0.745636974	0.458531896	1.060118576	0.514877761	0.616220676	0.127524828	0.500641968	0.179988204	0.293675444	0.61253729
IZ0501	Cr_CD_04_M_595	CROSS	Final	0	FALSE	FALSE		TRUE	XY	0.532212885	0.60550887	1.071	9735.02	2688	67	2	0.068815067	1278.519969	FALSE	0.174832667	0.263378942	0.67827268	0.454133503	0.327888292	0.413763797	0.666254218	0.507446167	0.428144863	0.971338249	0.340523086	0.504467232	0.087929943	0.40092356	0.182331366	0.255263912	0.564970428
EQ4900	Cr_CD_04_M_596	CROSS	Final	0	FALSE	FALSE		TRUE	XY	0.592991914	0.632973944	1.113	13927.28	2722	18	1	0.067826708	439.2649862	FALSE	0.229836622	0.317506261	0.921285129	0.781415794	0.387440929	0.550143142	0.721389735	0.644921131	0.60485589	1.382897014	0.520848128	0.966448277	0.184960681	0.621442038	0.246566373	0.279738669	0.659137829
AB0376	Cr_CD_04_M_609	CROSS	Final	0	FALSE	FALSE		TRUE	XY	0.628205128	0.677197802	1.092	15761.69	1451	18	1	0.031915221	65.92446776	FALSE	0.182721538	0.343491114	0.98891688	1.088081381	0.436184227	0.558569591	0.650691699	0.933212189	0.6032983	1.568106088	0.566373323	0.931943289	0.16134058	0.680320504	0.22148642	0.220280965	0.713565673
EL1386	Cr_CD_04_M_610	CROSS	Final	0	FALSE	FALSE		TRUE	XY	0.623496762	0.665124884	1.081	16526.42	1134	20	1	0.018720624	48.13947611	FALSE	0.205247153	0.371889446	0.96857051	1.058487158	0.419086609	0.52134713	0.653680716	0.959857188	0.589964545	1.385841844	0.503133866	0.811730705	0.137779412	0.723024241	0.185763195	0.236106836	0.659550107
SB6134	Cr_CD_04_M_617	CROSS	Final	0	FALSE	FALSE		TRUE	XY	0.669309701	0.682835821	1.072	15976.79	819	14	2	0.027945311	100.1472044	FALSE	0.231273041	0.360710835	1.062291218	0.951129941	0.430937723	0.568011596	0.712033049	0.874143245	0.656640182	1.427508592	0.633168629	0.894485258	0.184142161	0.697511981	0.260252586	0.254431641	0.855804138
GQ1020	Cr_CD_04_M_619	CROSS	Final	0	FALSE	FALSE		TRUE	XY	0.639042357	0.694290976	1.086	18653.53	1368	17	2	0.037985943	113.477425	FALSE	0.216044917	0.366365003	1.194680143	0.997130386	0.458304714	0.586323389	0.73380219	0.965393763	0.675421814	1.456936156	0.650386336	0.8953802	0.187203189	0.644006846	0.149730385	0.268421067	0.667005176
NX0047	Cr_CD_04_M_620	CROSS	Final	0	FALSE	FALSE		TRUE	XY	0.645948435	0.704880295	1.086	16373.66	1433	13	0	0.038258291	117.132542	FALSE	0.189328453	0.367724715	1.156552554	1.145864657	0.444311128	0.658313354	0.69214818	0.921846346	0.65776369	1.33006292	0.605240313	0.812402285	0.146271498	0.693858244	0.187251948	0.296329566	0.752427917
EI1783	Cr_CD_04_M_621	CROSS	Final	0	FALSE	FALSE		TRUE	XY	0.652234637	0.690875233	1.074	15011.38	1088	14	2	0.029741928	88.67746557	FALSE	0.213105047	0.431606001	1.180904396	0.999708482	0.539390923	0.611536208	0.761888846	0.930427692	0.654503621	1.411196408	0.641979786	0.780807831	0.12457219	0.645044128	0.184127024	0.303036842	0.717788958
GT4443	Cr_CD_04_M_622	CROSS	Final	0	FALSE	FALSE		TRUE	XY	0.60267035	0.662062615	1.086	16005.44	1687	17	1	0.025027454	43.31418115	FALSE	0.208804006	0.415983564	1.182785349	1.177474655	0.464654516	0.551874861	0.676769896	0.885511423	0.654777374	1.500802223	0.610354977	0.762178357	0.128518803	0.64640522	0.1899979	0.250852209	0.759679207
XX1487	Cr_CD_04_M_623	CROSS	Final	0	FALSE	FALSE		TRUE	XY	0.623048669	0.66620753	1.089	18459.85	1332	13	0	0.025326159	51.33136917	FALSE	0.240251192	0.361758165	1.096542195	1.018047499	0.530394459	0.499083255	0.638629381	0.849302862	0.609322528	1.442536415	0.683862695	0.809595055	0.146100894	0.626440764	0.217986651	0.267174494	0.72351633
LF4490	Cr_CD_04_M_624	CROSS	Final	0	FALSE	FALSE		TRUE	XY	0.625461255	0.660055351	1.084	15866.1	1347	12	0	0.021362838	50.57181781	FALSE	0.23414696	0.372996422	1.111930192	0.958899555	0.409489313	0.535355121	0.678868615	0.937470223	0.659204052	1.372233542	0.636262062	0.84576529	0.139983956	0.643132053	0.223936514	0.275555991	0.76458594
RM1995	Cr_CD_04_M_628	CROSS	Final	0	FALSE	FALSE		TRUE	XY	0.647632312	0.709842154	1.077	18419.04	858	26	0	0.030924665	116.296075	FALSE	0.226070416	0.360713699	1.172210938	1.119710916	0.432758714	0.595036445	0.707257278	0.838154438	0.645690551	1.379333569	0.659426337	0.887234086	0.143818571	0.69677899	0.187251889	0.281339312	0.786197332
WK4382	Cr_CD_04_M_630	CROSS	Final	0	FALSE	FALSE		TRUE	XY	0.64721969	0.682771194	1.097	16856.36	1609	17	1	0.039659565	89.50649023	FALSE	0.227807194	0.401984777	1.182699013	0.952815452	0.446834318	0.531668768	0.691193128	0.913423792	0.623325569	1.404514403	0.643199373	0.86881155	0.14404059	0.617808363	0.22317986	0.324150653	0.766535612
ZN1351	Cr_CD_04_M_637	CROSS	Final	0	FALSE	FALSE		TRUE	XY	0.618049225	0.660893345	1.097	17938.94	1483	17	0	0.030935647	69.81769444	FALSE	0.229444941	0.380847384	1.170414473	1.047664775	0.434529473	0.543733224	0.704110555	1.089529	0.675402065	1.558508661	0.657396546	1.011876715	0.170355622	0.773178164	0.233625789	0.314344028	0.743466271
YY1087	Cr_CD_04_M_639	CROSS	Final	0	FALSE	FALSE		TRUE	XY	0.635531136	0.672161172	1.092	17112.67	1444	24	3	0.030142763	61.58361904	FALSE	0.255307968	0.428045517	1.225057503	1.028887019	0.438330296	0.600374012	0.728407831	0.942050754	0.611944389	1.569013259	0.756165049	0.994059015	0.157485688	0.690950196	0.278390285	0.340391145	0.792804577
MH5097	Cr_CD_04_M_640	CROSS	Final	0	FALSE	FALSE		TRUE	XY	0.632162662	0.671903882	1.082	15924.29	1291	19	2	0.027329233	69.49370236	FALSE	0.224185866	0.442029218	1.138198548	0.913007927	0.422499301	0.561029839	0.778370814	0.882300116	0.612837497	1.353718405	0.729577419	0.882676899	0.17143625	0.652462505	0.237247675	0.278128627	0.673876337
QP9370	Cr_CD_F2 _589	CROSS	Final	0	FALSE	FALSE		TRUE	XX	0.800738007	0.045202952	1.084	12843.38	1348	23	114	0.050709422	426.0338476	FALSE	0.235218422	0.397091676	1.165892304	1.154602442	0.407836509	0.477755788	0.765063295	0.893689853	0.646169376	1.352291808	0.651775376	0.821746185	0.152218476	0.603423625	0.201426699	0.320087035	0.677547404
NR8611	Cr_CD_F2_527	CROSS	Final	0	FALSE	FALSE		TRUE	XX	0.816543438	0.03974122	1.082	15258.13	1390	15	1	0.021669229	55.96183037	FALSE	0.222832008	0.342243748	1.010739772	0.904697952	0.390283708	0.560225883	0.765559025	0.905615495	0.562519742	1.300028149	0.602105193	0.750485095	0.153688547	0.6005978	0.203235899	0.302789375	0.751074944
GQ1756	Cr_CD_F2_536	CROSS	Final	0	FALSE	FALSE		TRUE	XY	0.624080882	0.6796875	1.088	14785.29	1528	9	1	0.024201625	49.37776717	FALSE	0.239156684	0.387885629	0.990308872	0.981786886	0.519232428	0.504758579	0.765084958	0.900760385	0.588625742	1.232914931	0.534179721	0.763326453	0.132158417	0.622578416	0.214740518	0.222789061	0.72741237
MF8848	Cr_CD_F2_554	CROSS	Final	0	FALSE	FALSE		TRUE	XY	0.643715342	0.707486137	1.082	13406.99	998	14	2	0.020571052	39.9298453	FALSE	0.203103077	0.445290258	1.07123261	1.048781627	0.424629386	0.542180047	0.751026399	0.756247558	0.622362129	1.462744932	0.711196416	0.7491617	0.108227163	0.651675206	0.210934816	0.308048369	0.713881584
RI5939	Cr_CS02_F_307	CROSS	Final	0	FALSE	FALSE		TRUE	XX	0.840184758	0.030484988	1.0825	13969.03	1565	31	58	0.025438173	69.44556921	FALSE	0.234160851	0.415562133	1.081392176	1.085902153	0.448850056	0.553510149	0.750732143	0.863767907	0.628533252	1.385350285	0.737130626	0.896196787	0.162072811	0.687664057	0.183978412	0.326507991	0.760682727
BN7076	Cr_CS02_M_244	CROSS	Final	0	FALSE	FALSE		TRUE	XY	0.618671621	0.640501626	1.0765	11881.82	1195	38	11	0.024186251	59.62910813	FALSE	0.267383307	0	1.975455138	1.78263954	0.769579149	0.95254777	1.042937972	1.537980027	1.001614332	2.183504094	1.259739797	1.2552792	0.227490424	1.050175921	0.255179788	0.398255526	1.00498082
FT9439	Cr_KLKL_F_105	CROSS	Final	0	FALSE	FALSE		TRUE	XX	0.867070896	0.030783582	1.072	13716.98	1362	25	56	0.007755326	21.15690943	FALSE	0.255012483	0.340308253	1.172561684	1.047023806	0.472042831	0.680179091	0.675877852	1.014144838	0.652257485	1.282425552	0.605672872	0.687542231	0.151564023	0.662172207	0.19829444	0.234745624	0.711964524
BP8913	Cr_KLKL_F_106	CROSS	Final	0	FALSE	FALSE		TRUE	XX	0.854089219	0.029275093	1.076	14090.93	1446	26	122	0.010348122	36.6604936	FALSE	0.164361055	0.361154321	1.04443076	1.052804941	0.516147647	0.831385904	0.642541014	0.918463199	0.556244363	1.301617488	0.552554046	0.693566747	0.119935312	0.515863776	0.150806235	0.263786718	0.651270034
TW3928	Cr_KLKL_F_107	CROSS	Final	0	FALSE	FALSE		TRUE	XX	0.874533582	0.027052239	1.072	14513.47	1479	29	123	0.009829783	39.54639503	FALSE	0.16860195	0.320047429	0.983362089	1.062598804	0.424639893	0.585662679	0.537362733	0.869605726	0.508699713	1.236230563	0.556792954	0.71733343	0.150825365	0.515452059	0.120922118	0.266166462	0.664279281
GC7229	Cr_KLKL_F_108	CROSS	Final	0	FALSE	FALSE		TRUE	XX	0.833021515	0.028063611	1.069	15559.86	1287	33	75	0.019961564	71.50943284	FALSE	0.20225122	0.339463281	0.968839257	0.991911449	0.461636642	0.609645717	0.804698928	0.845637608	0.523976548	1.389922826	0.537537084	0.761639405	0.136569381	0.621728091	0.208485211	0.263048695	0.692744169
ML1067	Cr_KLKL_F_109	CROSS	Final	0	FALSE	FALSE		TRUE	XX	0.88028169	0.023474178	1.065	15730.11	1085	26	54	0.021461674	62.82324926	FALSE	0.242337851	0.425235542	1.197449046	1.269031528	0.629620692	0.812836245	0.841634526	1.100119757	0.669861998	1.526626746	0.817095593	0.908004073	0.166178159	0.813090534	0.198663637	0.284232039	0.786771575
ZH7806	Cr_KLKL_F_110	CROSS	Final	0	FALSE	FALSE		TRUE	XX	0.838754647	0.023698885	1.076	15982.13	1261	23	55	0.011362838	20.35055708	FALSE	0.260228119	0.479660677	1.269167386	1.335178606	0.565756828	0.701908881	0.86008553	1.00249457	0.708291008	1.780801271	0.718239619	1.157480156	0.16280682	0.793198331	0.260916387	0.316040449	0.891245329
ZJ5306	Cr_KLKL_F_111	CROSS	Final	0	FALSE	FALSE		TRUE	XX	0.855360444	0.033271719	1.082	17557.63	1331	20	0	0.035568856	117.6266385	FALSE	0.269797165	0.468286318	1.198680838	1.167355434	0.535949192	0.747595015	0.833084891	1.096616975	0.714390086	1.69310963	0.820156043	1.220209934	0.186300723	0.811783616	0.244793797	0.294629667	0.85011452
RQ4495	Cr_KLKL_F_112	CROSS	Final	0	FALSE	FALSE		TRUE	XX	0.863974002	0.028319406	1.077	17174.41	1264	19	42	0.027873929	94.50902162	FALSE	0.247053561	0.444381989	1.388053227	1.265603631	0.477920252	0.739646803	0.751816069	1.100940074	0.828499911	1.697408771	0.817436942	1.054941414	0.196862618	0.75921079	0.21968727	0.290024461	0.836360441
EA2448	Cr_KLKL_F_113	CROSS	Final	0	FALSE	FALSE		TRUE	XX	0.853351955	0.029795158	1.074	17229.08	1310	20	57	0.020629255	50.83322525	FALSE	0.265481352	0.45643755	1.318352303	1.254390683	0.5589967	0.632012778	0.897784337	1.282540761	0.712922486	1.655746947	0.867893017	1.003187515	0.185384224	0.783442784	0.231701259	0.323870998	0.828424867
KF0155	Cr_KLKL_F_114	CROSS	Final	0	FALSE	FALSE		TRUE	XX	0.825905292	0.030176416	1.077	15578.06	1229	29	94	0.017329233	65.76306823	FALSE	0.219988831	0.446204367	1.336623125	1.216903495	0.50340018	0.751056121	0.842595098	1.202845265	0.817367316	1.665803961	0.803437471	1.185384815	0.174026765	0.829563953	0.301963076	0.328538908	0.846831825
SM3226	Cr_KLKL_F_118	CROSS	Final	0	FALSE	FALSE		TRUE	XX	0.862406716	0.025652985	1.072	12017.45	1074	37	0	0.016223369	42.52574818	FALSE	0.219597284	0.381362014	1.047310125	1.004206149	0.549617303	0.566010128	0.711382033	0.934807083	0.560434903	1.352449664	0.773874477	0.692409626	0.102517565	0.629001846	0.199293481	0.275099895	0.710965971
RY5806	Cr_KLKL_F_119	CROSS	Final	0	FALSE	FALSE		TRUE	XX	0.847196262	0.026168224	1.07	13009.05	1151	32	1	0.006641775	25.82330881	FALSE	0.203320004	0.396723834	1.196167329	1.134441067	0.510644532	0.644397578	0.685984014	0.933580889	0.614725926	1.402024029	0.796829929	0.720729058	0.137980872	0.621797926	0.131985046	0.223690439	0.710889754
SR3463	Cr_KLKL_F_120	CROSS	Final	0	FALSE	FALSE		TRUE	XX	0.855679702	0.027932961	1.074	10832.5	1325	23	55	0.013828245	37.65599384	FALSE	0.23614129	0.408862304	1.200554134	1.063835897	0.498223042	0.606139057	0.755227479	1.120886451	0.709347018	1.369859499	0.750150165	0.730671739	0.180475458	0.671590259	0.171151662	0.298361473	0.832494977
HA8374	Cr_KLKL_F_123	CROSS	Final	0	FALSE	FALSE		TRUE	XX	0.846728972	0.028037383	1.07	10101.41	1271	27	68	0.010281133	23.07569521	FALSE	0.214425451	0.402517951	1.237549658	0.997781218	0.451026017	0.640504463	0.775040099	0.867403416	0.652383989	1.349415198	0.622685173	0.6721832	0.157601716	0.598827124	0.194527244	0.290751408	0.744252326
EZ4112	Cr_KLKL_F_124	CROSS	Final	0	FALSE	FALSE		TRUE	XX	0.867537313	0.030783582	1.072	11362.68	1384	32	55	0.010552383	21.47709709	FALSE	0.21297784	0.397441292	1.086803037	1.030214297	0.455526158	0.530684453	0.568703638	0.818908597	0.646150126	1.216085867	0.710131485	0.718052149	0.127082645	0.609803081	0.165893896	0.2662223	0.677656765
CQ1411	Cr_KLKL_F_125	CROSS	Final	0	FALSE	FALSE		TRUE	XX	0.832715477	0.030583874	1.079	10302.87	1584	24	23	0.014162091	33.00561824	FALSE	0.227024179	0.401344583	1.120755962	1.116194125	0.503452081	0.59789181	0.738532269	0.902855457	0.683110805	1.418537142	0.663795793	0.729990958	0.149958254	0.745132374	0.191305967	0.307972518	0.767747437
QQ1490	Cr_KLKL_F_126	CROSS	Final	0	FALSE	FALSE		TRUE	XX	0.846654275	0.028345725	1.076	10287.64	1539	25	55	0.010336042	18.22007329	FALSE	0.239802282	0.453262278	1.190943476	1.1187209	0.507113297	0.645726209	0.773743884	0.977677888	0.587695418	1.521631503	0.690148439	0.739528074	0.13637722	0.740111298	0.179924614	0.351781296	0.796003601
WX7558	Cr_KLKL_F_127	CROSS	Final	0	FALSE	FALSE		TRUE	XX	0.869036483	0.030869972	1.069	10744.46	1396	31	121	0.007207336	21.23096545	FALSE	0.213970776	0.413329368	1.107733874	1.024248974	0.504911466	0.579275385	0.642843041	0.971942938	0.613711743	1.22695813	0.761974225	0.748106611	0.12406396	0.600402556	0.161478598	0.272605656	0.736658848
WP4617	Cr_KLKL_F_128	CROSS	Final	0	FALSE	FALSE		TRUE	XX	0.888785047	0.023831776	1.07	11148.72	1303	25	121	0.009924226	33.21705111	FALSE	0.204148906	0.416191091	1.116271149	1.201034205	0.437449128	0.536742993	0.691289815	0.930061514	0.687253479	1.398007402	0.61092188	0.686087426	0.147729898	0.716404794	0.177329696	0.243346213	0.730845908
CD3490	Cr_KLKL_F_131	CROSS	Final	0	FALSE	FALSE		TRUE	XX	0.842178771	0.031191806	1.074	12323.95	1405	27	68	0.011502306	39.77201124	FALSE	0.191659322	0.42040091	1.160179928	1.134619943	0.475578022	0.647681927	0.671537914	1.044389135	0.649710497	1.388353516	0.651739067	0.773940143	0.130964499	0.615711659	0.148085632	0.258521	0.7219276
TT7460	Cr_KLKL_F_132	CROSS	Final	0	FALSE	FALSE		TRUE	XX	0.859345794	0.030841121	1.07	9793.51	1248	31	0	0.009561827	20.77056505	FALSE	0.1883901	0.398120868	1.15433609	1.11267584	0.500944083	0.589472114	0.747331786	0.912543267	0.670648336	1.43860603	0.655229959	0.724867926	0.145708766	0.564047108	0.172256964	0.280798253	0.738039917
IR5240	Cr_KLKL_F_134	CROSS	Final	0	FALSE	FALSE		TRUE	XX	0.86588785	0.028037383	1.07	9812.95	1127	29	55	0.008357127	21.13141325	FALSE	0.18526538	0.415675184	1.03587601	1.062881139	0.529096728	0.539694968	0.706719147	0.93529464	0.600023408	1.398661902	0.743201548	0.754615037	0.15112682	0.678287331	0.169164208	0.327933989	0.680936891
ZU4431	Cr_KLKL_F_135	CROSS	Final	0	FALSE	FALSE		TRUE	XX	0.873482726	0.028944911	1.071	12301.59	1609	20	122	0.007625741	24.19039725	FALSE	0.20395743	0.414580667	1.04726328	1.059456829	0.409296795	0.547896803	0.630243904	0.916060693	0.496765187	1.402583299	0.659833583	0.653736808	0.114212909	0.631300678	0.142827104	0.22875098	0.739579393
KT6211	Cr_KLKL_F_141	CROSS	Final	0	FALSE	FALSE		TRUE	XX	0.862570356	0.031894934	1.066	10274.16	1275	21	55	0.012724577	26.71355433	FALSE	0.237196908	0.441009105	1.135566813	1.158342388	0.472933843	0.655819764	0.751204651	0.713342691	0.648909226	1.468829929	0.672560785	0.765999042	0.116895152	0.697477653	0.152713151	0.267077684	0.811939518
XN8802	Cr_KLKL_F_142	CROSS	Final	0	FALSE	FALSE		TRUE	XX	0.862754159	0.025415896	1.082	11391.98	1716	26	123	0.02284318	40.1010569	FALSE	0.166520603	0.394049018	1.000528114	1.266592399	0.521770408	0.542311168	0.734200487	0.939871426	0.592346352	1.295735699	0.592434133	0.61279933	0.143609756	0.600597768	0.171699683	0.264133102	0.728143596
FJ5533	Cr_KLKL_F_143	CROSS	Final	0	FALSE	FALSE		TRUE	XX	0.850606909	0.027544351	1.071	12718.29	1390	37	121	0.006540742	28.91516845	FALSE	0.180370118	0.389439057	1.056588339	1.086623816	0.39722312	0.561946484	0.670608866	0.957203932	0.663611072	1.349316303	0.718807158	0.795389763	0.151749925	0.553376152	0.170620382	0.243193015	0.720458323
EL0554	Cr_KLKL_F_145	CROSS	Final	0	FALSE	FALSE		TRUE	XX	0.862406716	0.031716418	1.072	10924.69	1371	30	67	0.010896112	28.13927898	FALSE	0.239091384	0.419782959	1.09659831	1.158751085	0.45703801	0.631779761	0.736496661	0.967624435	0.60486825	1.34612477	0.707296756	0.757275277	0.171721071	0.597270782	0.166961212	0.323945027	0.824737126
PQ5579	Cr_KLKL_F_146	CROSS	Final	0	FALSE	FALSE		TRUE	XX	0.873120301	0.029135338	1.064	11703.57	936	32	68	0.024227982	62.24912367	FALSE	0.210363085	0.427732577	1.258162644	1.094281085	0.503350502	0.573585455	0.749514615	0.925870996	0.735587246	1.413328916	0.838974465	0.745413304	0.172853177	0.636301338	0.166615766	0.326225126	0.685517072
YJ5072	Cr_KLKL_F_177	CROSS	Final	0	FALSE	FALSE		TRUE	XX	0.86746988	0.030583874	1.079	16265.98	1283	29	67	0.021309027	74.06442872	FALSE	0.308988451	0.460839122	1.189968257	1.222981945	0.563937736	0.587114944	0.920325728	0.999017574	0.849195677	1.6957478	0.67318415	1.058097937	0.187753826	0.821715009	0.271302434	0.397947124	0.831920358
ER1871	Cr_KLKL_F_178	CROSS	Final	0	FALSE	FALSE		TRUE	XX	0.870473538	0.026926648	1.077	12742.96	1355	28	55	0.027758621	67.55284969	FALSE	0.281017933	0.457036705	1.246178377	1.155304664	0.479245047	0.612024255	0.942716678	0.888804553	0.82076698	1.733741743	0.748570248	1.067962313	0.190693543	0.762224847	0.220200033	0.381779459	0.907403059
SI0399	Cr_KLKL_F_179	CROSS	Final	0	FALSE	FALSE		TRUE	XX	0.830555556	0.02962963	1.08	12053.28	1610	18	0	0.02257852	54.35400568	FALSE	0.290460279	0.487916853	1.204319169	1.02387041	0.5162079	0.635926318	0.970109124	0.934351232	0.673675369	1.588032049	0.737143553	1.038057416	0.201438891	0.818449201	0.282495644	0.379564632	0.877852103
BU3246	Cr_KLKL_F_180	CROSS	Final	0	FALSE	FALSE		TRUE	XX	0.889302326	0.025116279	1.075	13067.31	1576	23	123	0.028915001	110.5379098	FALSE	0.18213389	0.432223617	1.177977717	1.086910772	0.485945462	0.530101452	0.667543664	1.002272082	0.69019561	1.323455248	0.660197087	0.666319235	0.147084595	0.638693044	0.19353639	0.315290599	0.709863009
CK0722	Cr_KLKL_F_181	CROSS	Final	0	FALSE	FALSE		TRUE	XX	0.882325142	0.025047259	1.058	13108.59	816	34	123	0.035101032	109.0934493	FALSE	0.25990582	0.440779521	1.20112038	1.071968471	0.490289024	0.694887618	0.791846906	0.875761318	0.705109919	1.520300289	0.572448862	0.835406115	0.163251674	0.709610783	0.190485715	0.34366766	0.774072308
VV5139	Cr_KLKL_F_182	CROSS	Final	0	FALSE	FALSE		TRUE	XX	0.843575419	0.029795158	1.074	10765.57	1410	20	9	0.017383044	52.6982922	FALSE	0.232035932	0.423572398	1.192040479	1.052150121	0.509865985	0.82290085	0.767074751	0.897118908	0.654865221	1.476930072	0.737629038	0.871110076	0.171286733	0.807667105	0.223861728	0.331426824	0.800886232
TR5872	Cr_KLKL_F_183	CROSS	Final	0	FALSE	FALSE		TRUE	XX	0.860617399	0.029934518	1.069	9802.77	1244	23	69	0.014946189	39.63772671	FALSE	0.262068739	0.416208818	1.333296386	1.068677348	0.521587178	0.654304745	0.762437428	0.965951299	0.70439262	1.647697263	0.770088326	0.84455706	0.165667432	0.632984244	0.236565747	0.382442858	0.802528131
HY5227	Cr_KLKL_F_184	CROSS	Final	0	FALSE	FALSE		TRUE	XX	0.893289842	0.027958993	1.073	11215.39	1535	34	69	0.017690534	70.98477243	FALSE	0.246001264	0.430123268	1.250692181	1.069245073	0.406851673	0.630651301	0.780356311	0.896000979	0.766625178	1.48429976	0.696453741	0.872461894	0.148902541	0.72543178	0.248141181	0.313230315	0.823689625
DI5699	Cr_KLKL_F_191	CROSS	Final	0	FALSE	FALSE		TRUE	XX	0.857879925	0.032363977	1.066	10571.9	1304	27	123	0.01613881	31.80212554	FALSE	0.241678453	0.428116117	1.189568779	1.103964474	0.52261192	0.552218713	0.855570102	0.894541344	0.726737987	1.43540921	0.696942014	0.788505514	0.135642623	0.653241252	0.215382324	0.343930668	0.816125908
CH2726	Cr_KLKL_F_192	CROSS	Final	0	FALSE	FALSE		TRUE	XX	0.868347339	0.026143791	1.071	11576.96	1461	30	68	0.013083681	41.75822574	FALSE	0.217155483	0.426882418	1.305265118	1.174747244	0.501599797	0.630303723	0.722037662	0.866030578	0.631340265	1.364520751	0.693360009	0.776628858	0.142006211	0.688350058	0.250238439	0.294032325	0.756329917
TC2496	Cr_KLKL_F_193	CROSS	Final	0	FALSE	FALSE		TRUE	XX	0.847481343	0.027052239	1.072	13048.93	1399	26	60	0.010204261	33.58673172	FALSE	0.235268352	0.386928309	0.971114188	1.102619235	0.492684116	0.581503666	0.688408993	0.789490086	0.591312901	1.271445352	0.684807164	0.709176981	0.125067736	0.608402426	0.198100551	0.320869248	0.672085814
LA6822	Cr_KLKL_F_194	CROSS	Final	0	FALSE	FALSE		TRUE	XX	0.85061263	0.033459001	1.061	10441.7	968	21	22	0.030273446	79.87717114	FALSE	0.216535717	0.433646052	1.137554729	1.139182817	0.478945209	0.609862646	0.809064013	0.984610218	0.619822715	1.427545949	0.687053176	0.736374668	0.158786474	0.682073142	0.207150268	0.296886653	0.817491763
QJ0235	Cr_KLKL_F_195	CROSS	Final	0	FALSE	FALSE		TRUE	XX	0.853488372	0.025116279	1.075	11126.17	1642	22	69	0.013181419	25.49786109	FALSE	0.192878607	0.435999125	1.083301888	1.096783617	0.558592984	0.577467405	0.780592126	0.978863425	0.677052445	1.442904547	0.576568623	0.72262069	0.134278024	0.650808012	0.225144879	0.343424584	0.816902917
EC9945	Cr_KLKL_F_203	CROSS	Final	0	FALSE	FALSE		TRUE	XX	0.879886952	0.02731983	1.0615	13952.31	1324	31	111	0.021546233	49.73689345	FALSE	0.209570988	0.444585786	1.173138827	1.018612476	0.492534825	0.574456726	0.673221713	0.967079801	0.636740306	1.394320793	0.675300221	0.799580691	0.149222571	0.586139377	0.170867727	0.30847932	0.702894213
KM7628	Cr_KLKL_F_208	CROSS	Final	0	FALSE	FALSE		TRUE	XX	0.838425926	0.031481481	1.08	11230.27	1637	20	0	0.017251263	28.89964019	FALSE	0.22127702	0.498385305	1.194628774	1.133989075	0.471404646	0.604437993	0.829454907	0.862935856	0.675317876	1.578234972	0.750204787	0.729813464	0.133389528	0.744594947	0.221187975	0.32261032	0.951001439
ZP6478	Cr_KLKL_F_209	CROSS	Final	0	FALSE	FALSE		TRUE	XX	0.857276119	0.027985075	1.072	12567	1186	28	67	0.010354711	39.46042758	FALSE	0.202435012	0.396594378	0.986393241	0.935068327	0.380838823	0.52582176	0.645500321	0.852709743	0.586297628	1.2517709	0.661176302	0.707885953	0.150155215	0.599665978	0.193284058	0.248667222	0.672157447
HX1056	Cr_KLKL_F_210	CROSS	Final	0	FALSE	FALSE		TRUE	XX	0.856145251	0.033985102	1.074	10553.85	1505	20	68	0.016684604	32.44287783	FALSE	0.245028994	0.43083791	1.07534186	1.153133354	0.507966139	0.655684701	0.80018169	0.90990465	0.687047654	1.367367907	0.678804219	0.649904821	0.137011572	0.662885862	0.182397839	0.352477903	0.780473249
UL1824	Cr_KLKL_F_214	CROSS	Final	0	FALSE	FALSE		TRUE	XX	0.834264432	0.030726257	1.074	10843.99	1456	31	55	0.00856029	26.71235833	FALSE	0.25202901	0.459056133	1.220215096	1.079953067	0.452877595	0.702785614	0.806529718	0.865456369	0.603099057	1.377537266	0.753043869	0.816028067	0.148377123	0.654002831	0.22759151	0.351070048	0.797953539
UA8722	Cr_KLKL_F_215	CROSS	Final	0	FALSE	FALSE		TRUE	XX	0.871602624	0.034676664	1.067	10716.28	1374	24	123	0.01965078	63.83926748	FALSE	0.213693616	0.37811639	1.214974186	1.014624756	0.529101662	0.592463219	0.890701122	0.747181129	0.651158976	1.430067542	0.57846582	0.711347789	0.128869382	0.66618285	0.230303863	0.337430619	0.771909867
DD7652	Cr_KLKL_F_216	CROSS	Final	0	FALSE	FALSE		TRUE	XX	0.860829493	0.02764977	1.085	11929.15	1721	31	121	0.019931913	36.35028107	FALSE	0.216276936	0.43364364	1.029914124	1.036033588	0.544213128	0.578247406	0.679931097	1.054391979	0.632065155	1.356006094	0.756717792	0.749927703	0.127838112	0.796536221	0.200768706	0.310499912	0.796452392
ZA5237	Cr_KLKL_F_217	CROSS	Final	0	FALSE	FALSE		TRUE	XX	0.87099768	0.02412993	1.0775	13701.27	1363	40	122	0.01157259	45.81309328	FALSE	0.207426022	0.389160995	1.087855333	1.151936982	0.485867357	0.679061122	0.761973141	1.018591682	0.67424405	1.374544078	0.719787272	0.777811089	0.136775639	0.706211889	0.195456329	0.336611123	0.721465949
TB8111	Cr_KLKL_F_218	CROSS	Final	0	FALSE	FALSE		TRUE	XX	0.873252563	0.029822926	1.073	11303.95	1312	22	68	0.017584011	58.65980235	FALSE	0.236731444	0.489032669	1.033178825	1.16791051	0.4979676	0.775658184	0.823871427	0.940998643	0.631106921	1.386506697	0.594836409	0.916140073	0.165340459	0.735318297	0.225142573	0.326700008	0.740095389
CK7725	Cr_KLKL_F_250	CROSS	Final	0	FALSE	FALSE		TRUE	XX	0.843311506	0.029934518	1.069	13869.12	1171	29	122	0.004744125	27.85923556	FALSE	0.256180609	0.372626341	1.259200158	1.147152687	0.449271426	0.527935385	0.674952627	0.973457475	0.653177636	1.556046645	0.834587828	0.666949236	0.128919485	0.567663928	0.209313906	0.215226321	0.73833083
QI6908	Cr_KLKL_F_256	CROSS	Final	0	FALSE	FALSE		TRUE	XX	0.868544601	0.030046948	1.065	10942.15	998	28	11	0.018205579	40.24366084	FALSE	0.202885253	0.41161945	1.364449021	1.2460079	0.472210857	0.667693539	0.645028881	1.104810731	0.6118544	1.483712649	0.803315934	0.759266073	0.169619383	0.616880837	0.168614095	0.276819564	0.80843376
IL7581	Cr_KLKL_F_257	CROSS	Final	0	FALSE	FALSE		TRUE	XX	0.848148148	0.023148148	1.08	11784.25	1569	20	55	0.016943773	35.21854804	FALSE	0.170990949	0.449922587	1.152046217	1.174449002	0.485308804	0.618367766	0.715870793	0.879733584	0.609712144	1.45685986	0.701359899	0.702293348	0.142563174	0.614718827	0.171754681	0.248467245	0.766786212
EH1329	Cr_KLKL_F_258	CROSS	Final	0	FALSE	FALSE		TRUE	XX	0.868494424	0.024163569	1.076	14459.03	1300	30	55	0.012913464	38.05466336	FALSE	0.186596143	0.451620761	1.195653861	1.242406638	0.449615094	0.551973245	0.771420822	1.035615509	0.540561695	1.462476663	0.757588639	0.776953695	0.147036101	0.711942437	0.168890949	0.249048447	0.76595711
FX7476	Cr_KLKL_F_265	CROSS	Final	0	FALSE	FALSE		TRUE	XX	0.864689527	0.030583874	1.079	11636.79	1705	24	94	0.017745443	44.4878697	FALSE	0.228413513	0.435515307	1.115084179	1.100733142	0.427007806	0.635398615	0.729324864	0.990651235	0.581345906	1.465094804	0.711622387	0.731129485	0.122284586	0.610649521	0.204094091	0.293981426	0.732934106
XB4046	Cr_KLKL_F_266	CROSS	Final	0	FALSE	FALSE		TRUE	XX	0.879213483	0.028089888	1.068	11412.12	1402	22	122	0.012775093	21.15686969	FALSE	0.171747303	0.402729899	1.179360687	1.016726506	0.496139402	0.672618518	0.726596241	0.879854421	0.659649844	1.284774975	0.592878699	0.659912722	0.118470588	0.553622172	0.227828054	0.285924208	0.696715716
UH0435	Cr_KLKL_F_267	CROSS	Final	0	FALSE	FALSE		TRUE	XX	0.872567192	0.032437442	1.079	11672.79	1501	19	68	0.020189985	53.14368697	FALSE	0.224453547	0.444794968	1.108560647	1.085344269	0.500308669	0.537831819	0.725875917	1.00644285	0.674045995	1.49458648	0.653228357	0.715424263	0.150006931	0.614420167	0.147265514	0.251610713	0.751491035
SS3134	Cr_KLKL_F_274	CROSS	Final	0	FALSE	FALSE		TRUE	XX	0.861293346	0.028584817	1.067	17659.18	1163	33	67	0.016669229	45.03091128	FALSE	0.173111138	0.401037971	1.079665341	1.064772234	0.446736593	0.560671695	0.693237339	0.920144872	0.643235005	1.352384752	0.728573077	0.794657701	0.158387914	0.657844974	0.215128954	0.237327045	0.626473181
EB6215	Cr_KLKL_F_275	CROSS	Final	0	FALSE	FALSE		TRUE	XX	0.87090739	0.030402245	1.069	15382.56	1214	23	123	0.011831759	24.76943027	FALSE	0.178058756	0.421256201	1.088700248	1.02096121	0.517729072	0.657562728	0.747404714	1.006399268	0.563300152	1.516327299	0.770482793	0.865785508	0.170517749	0.666338899	0.20919791	0.256004154	0.722766427
MI2048	Cr_KLKL_F_276	CROSS	Final	0	FALSE	FALSE		TRUE	XX	0.870111732	0.029795158	1.074	14005.34	1026	27	55	0.013693169	29.13202168	FALSE	0.220558797	0.330374087	1.079945552	0.959063051	0.429479173	0.506878246	0.608553781	0.911224141	0.687880691	1.309001111	0.627832148	0.728936472	0.163794717	0.595701536	0.166864975	0.235767287	0.667674106
QF3537	Cr_KLKL_F_279	CROSS	Final	0	FALSE	FALSE		TRUE	XX	0.878618114	0.035480859	1.071	15440.4	1122	32	55	0.014313639	47.42188661	FALSE	0.170267561	0.37097474	1.029247654	0.894406626	0.411129128	0.519545978	0.642146394	0.718051141	0.54538727	1.306895822	0.630682963	0.80820422	0.118908803	0.587873204	0.164568229	0.248439089	0.617535639
WE7340	Cr_KLKL_F_280	CROSS	Final	0	FALSE	FALSE		TRUE	XX	0.845479705	0.039667897	1.084	17533.37	1672	23	1	0.023306611	60.95278062	FALSE	0.20663451	0.412413509	1.054503302	1.039503336	0.440816486	0.579751531	0.646880656	0.901537871	0.560816213	1.330776437	0.781138905	0.817982928	0.128954079	0.680131531	0.183250533	0.241140135	0.64066394
YM5075	Cr_KLKL_F_281	CROSS	Final	0	FALSE	FALSE		TRUE	XX	0.879776328	0.032618826	1.073	16524.82	1240	25	123	0.018391171	56.95917085	FALSE	0.206598344	0.339307825	1.002552655	1.178590905	0.410655056	0.584393734	0.707844414	0.908451769	0.515225044	1.505493147	0.688540117	0.77023542	0.178458851	0.687450846	0.225479036	0.238308225	0.73229249
KW4764	Cr_KLKL_F_282	CROSS	Final	0	FALSE	FALSE		TRUE	XX	0.845149254	0.036380597	1.072	14598.97	1108	25	48	0.010471118	35.43793905	FALSE	0.191725854	0.345846315	1.096721201	0.900885469	0.448319297	0.558875041	0.718201349	0.784575894	0.597028417	1.257074979	0.662375493	0.770876298	0.136858969	0.567231795	0.152339514	0.25433301	0.69203512
LP8085	Cr_KLKL_F_283	CROSS	Final	0	FALSE	FALSE		TRUE	XX	0.861111111	0.037037037	1.08	15354.17	1649	33	122	0.019950582	44.67874278	FALSE	0.160803192	0.365959148	1.176292608	0.909264221	0.343685072	0.477980812	0.650832846	0.847847692	0.640151711	1.493339971	0.608303691	0.83293318	0.137877828	0.591435312	0.17076791	0.276406945	0.621524852
DL8761	Cr_KLKL_F_284	CROSS	Final	0	FALSE	FALSE		TRUE	XX	0.874766355	0.030841121	1.07	14980	1189	29	122	0.021419943	67.67621697	FALSE	0.235781059	0.364753031	1.144192341	0.916822498	0.448865187	0.607142902	0.721161602	0.851468688	0.732176289	1.515086894	0.745994715	0.960480712	0.190320441	0.786782435	0.208811764	0.294459301	0.72489992
BG7527	Cr_KLKL_F_288	CROSS	Final	0	FALSE	FALSE		TRUE	XX	0.864573571	0.037019681	1.067	14541.26	1002	30	55	0.015643532	34.92526127	FALSE	0.219307025	0.353270676	1.02845298	1.002595519	0.43407524	0.508277899	0.674081986	0.876815479	0.545826232	1.365975362	0.589013693	0.751998217	0.135407818	0.642447859	0.179695596	0.257405517	0.694850479
BE6669	Cr_KLKL_F_289	CROSS	Final	0	FALSE	FALSE		TRUE	XX	0.864186047	0.033488372	1.075	13385.53	1456	27	69	0.010991654	29.83992887	FALSE	0.219415976	0.402374685	1.156322943	0.987409248	0.479846379	0.61641172	0.752155278	0.849499172	0.691343359	1.293859481	0.716519792	0.826041012	0.127301608	0.710468483	0.182734586	0.27074004	0.694779905
MC4100	Cr_KLKL_F_290	CROSS	Final	0	FALSE	FALSE		TRUE	XX	0.850601295	0.028214616	1.081	14214.98	1334	25	26	0.013617395	28.32494679	FALSE	0.208230967	0.361801306	1.146184848	0.990785454	0.385579031	0.595005919	0.702287076	0.930356264	0.63264226	1.370103486	0.719381713	0.857123684	0.179528861	0.645656695	0.228843019	0.277383346	0.64544565
HR1660	Cr_KLKL_F_291	CROSS	Final	0	FALSE	FALSE		TRUE	XX	0.84501845	0.028597786	1.084	16876.58	1566	23	67	0.02480123	56.02574326	FALSE	0.243177248	0.345982445	1.151299691	1.015371668	0.446536	0.609779986	0.697534738	0.844009923	0.642073261	3.673552597	0.7184513	1.036999274	0.114596686	0.672411163	0.227297253	0.221786657	0.732435177
RN6288	Cr_KLKL_F_292	CROSS	Final	0	FALSE	FALSE		TRUE	XX	0.874299065	0.034579439	1.07	14360.75	1126	25	122	0.009381726	21.96960321	FALSE	0.230698266	0.36202846	1.138311065	1.057953142	0.525738578	0.574621821	0.744668657	0.834218301	0.628657998	1.510645393	0.676844898	0.934979059	0.159253527	0.674198797	0.228748507	0.345525143	0.715700809
QU5685	Cr_KLKL_F_293	CROSS	Final	0	FALSE	FALSE		TRUE	XX	0.885700847	0.035277516	1.063	13518.66	1128	41	120	0.016507797	35.26088633	FALSE	0.224208625	0.429702375	1.102624136	1.01800036	0.491690771	0.62484007	0.663305423	0.939664189	0.638672802	1.433574115	0.722852748	0.77219196	0.127231552	0.631941366	0.173316004	0.307278992	0.74674565
JR0375	Cr_KLKL_F_299	CROSS	Final	0	FALSE	FALSE		TRUE	XX	0.839310666	0.031672101	1.0735	14916.73	1380	27	0	0.012432462	24.63595717	FALSE	0.212982367	0.442389247	1.229626241	0.979437323	0.462702013	0.635528119	0.691907776	0.868555096	0.666231904	1.413044483	0.717181416	0.909180628	0.124155915	0.724689765	0.215462803	0.287462508	0.725091998
VY4474	Cr_KLKL_F_301	CROSS	Final	0	FALSE	FALSE		TRUE	XX	0.834718375	0.030470914	1.083	16885.25	1503	17	0	0.020678673	41.0990405	FALSE	0.206097097	0.359544677	1.043040824	1.043929174	0.468752449	0.582875755	0.698183527	0.853585476	0.663123331	1.43859327	0.638012651	0.841740815	0.159251464	0.687345662	0.224219428	0.273433993	0.692024303
BM9632	Cr_KLKL_F_302	CROSS	Final	0	FALSE	FALSE		TRUE	XX	0.825023084	0.035087719	1.083	13583.71	1610	19	0	0.027779486	65.16906628	FALSE	0.226447781	0.365437836	1.03329683	1.018941395	0.470195701	0.566413922	0.714090856	0.868246139	0.554487869	1.380477497	0.602044847	0.776224122	0.164682602	0.617210076	0.22092646	0.269734938	0.705992918
NX6900	Cr_KLKL_F_303	CROSS	Final	0	FALSE	FALSE		TRUE	XX	0.883796296	0.02962963	1.08	13407.23	1664	30	120	0.016853723	34.61004718	FALSE	0.199071703	0.389789704	1.111564476	0.910180588	0.342949303	0.588861407	0.733484873	0.878854206	0.596916762	1.239256779	0.605345051	0.771971572	0.130601181	0.631748716	0.182289712	0.300509513	0.614892139
DE1203	Cr_KLKL_F_314	CROSS	Final	0	FALSE	FALSE		TRUE	XX	0.871759259	0.033333333	1.08	14515.27	1579	30	121	0.016110257	30.92441242	FALSE	0.188766748	0.3627904	1.127502409	0.941698058	0.438434885	0.664266053	0.697885824	0.904151388	0.569262642	1.393911538	0.697885824	0.710975489	0.150393362	0.653174284	0.173128043	0.274814072	0.709942095
SK5714	Cr_KLKL_F_315	CROSS	Final	0	FALSE	FALSE		TRUE	XX	0.851679104	0.02891791	1.072	16440.1	1146	26	0	0.017037118	52.13360953	FALSE	0.186251893	0.33856239	1.043789187	0.972621743	0.479254954	0.55486276	0.617514442	0.776455068	0.509668392	1.362339535	0.712465195	0.698779148	0.128344708	0.61015439	0.19488931	0.24142187	0.625665244
LU3507	Cr_KLKL_F_316	CROSS	Final	0	FALSE	FALSE		TRUE	XX	0.87593633	0.030898876	1.068	14117.02	1081	32	122	0.006295849	16.50383876	FALSE	0.175745344	0.351986543	1.007719976	1.030033472	0.403697184	0.52907778	0.759508898	0.796981404	0.612594007	1.374157164	0.651058224	0.855775694	0.140114587	0.638732674	0.197137965	0.235318836	0.726286582
DE3979	Cr_KLKL_F_317	CROSS	Final	0	FALSE	FALSE		TRUE	XX	0.876056338	0.0342723	1.065	12828.1	1205	21	123	0.009599165	23.60418409	FALSE	0.219206212	0.325691164	1.046842182	1.047933536	0.41097267	0.599231205	0.689267896	0.82701234	0.591903544	1.385473684	0.573818252	0.844785816	0.137276721	0.670714881	0.151074551	0.244073488	0.67515825
AV0687	Cr_KLKL_F_318	CROSS	Final	0	FALSE	FALSE		TRUE	XX	0.857806691	0.029739777	1.076	13498.57	1513	31	67	0.011533055	34.0443478	FALSE	0.190094151	0.381373612	1.107153968	0.963731413	0.464271256	0.597692754	0.741485719	0.837347695	0.608730957	1.329918236	0.597470509	0.738892852	0.116530826	0.569763879	0.207058905	0.257508678	0.63458554
XI7213	Cr_KLKL_F_319	CROSS	Final	0	FALSE	FALSE		TRUE	XX	0.887859129	0.028730306	1.079	17468.21	1428	22	123	0.024405886	67.43531066	FALSE	0.194639259	0.395346684	1.240539044	1.028725732	0.441430391	0.626967402	0.711978961	0.849428626	0.617979648	1.533757364	0.71255143	0.858530874	0.166874541	0.622673889	0.206546602	0.25062667	0.718791335
JY0149	Cr_KLKL_F_325	CROSS	Final	0	FALSE	FALSE		TRUE	XX	0.858534323	0.028293135	1.078	15632.7	1560	19	54	0.015207555	31.39885026	FALSE	0.203227853	0.293999122	1.056503373	1.046396353	0.445476477	0.564585782	0.630345376	0.828711625	0.536183778	1.258643761	0.54238872	0.641731765	0.1260179	0.623116938	0.17770443	0.240009727	0.658683412
MC6975	Cr_KLKL_F_326	CROSS	Final	0	FALSE	FALSE		TRUE	XX	0.874649205	0.03554724	1.069	14269.67	1059	35	122	0.014717769	32.03464901	FALSE	0.172533736	0.378424929	0.977247339	0.93548044	0.438552445	0.581933446	0.66841055	0.829100988	0.577027938	1.412365929	0.563993301	0.841855309	0.151790444	0.688733371	0.222429764	0.253194309	0.744656166
NB1190	Cr_KLKL_F_327	CROSS	Final	0	FALSE	FALSE		TRUE	XX	0.856018519	0.031481481	1.08	12569.86	1518	18	69	0.014290578	31.41210717	FALSE	0.219175043	0.356646721	1.174635029	0.997465221	0.368580026	0.605177695	0.70422413	0.753787125	0.55458048	1.404709157	0.664446445	0.853629113	0.135880571	0.634692737	0.229596796	0.282978449	0.719419205
PM3552	Cr_KLKL_F_328	CROSS	Final	0	FALSE	FALSE		TRUE	XX	0.833645736	0.029990628	1.067	13185.5	992	25	0	0.014735339	44.32181947	FALSE	0.149103234	0.355162993	0.996322066	1.016344067	0.422737246	0.530886387	0.602252685	0.794054353	0.565014797	1.138144572	0.593682662	0.802927739	0.13545187	0.632058164	0.159265916	0.251791829	0.618861845
JF4764	Cr_KLKL_F_332	CROSS	Final	0	FALSE	FALSE		TRUE	XX	0.843604108	0.031746032	1.071	15167.35	1377	32	19	0.011616517	40.26609845	FALSE	0.186914658	0.342248321	1.015734471	1.024898894	0.381213599	0.598588424	0.658849446	0.872004681	0.544656787	1.324028278	0.620345686	0.796909162	0.163179464	0.581907857	0.157047872	0.239791398	0.630433144
IU0126	Cr_KLKL_F_336	CROSS	Final	0	FALSE	FALSE		TRUE	XX	0.862534949	0.033550792	1.073	14772.22	1125	32	122	0.006167362	17.60493853	FALSE	0.226167807	0.400684601	1.09401315	0.987800253	0.464385262	0.740579411	0.705242807	0.954900656	0.558886985	1.46552136	0.586167927	0.90555126	0.129906023	0.711132241	0.209853398	0.306047488	0.624280012
UF6388	Cr_KLKL_F_337	CROSS	Final	0	FALSE	FALSE		TRUE	XX	0.856405443	0.041295167	1.0655	13249.24	1078	29	53	0.013692071	46.05679653	FALSE	0.25858086	0.419042887	1.080967621	1.018397997	0.436251421	0.552786403	0.806008465	0.888126379	0.573315881	1.384834096	0.576485874	0.852954552	0.128384718	0.584788237	0.218201187	0.299036009	0.780573044
FL2041	Cr_KLKL_F_345	CROSS	Final	0	FALSE	FALSE		TRUE	XX	0.863742417	0.03359776	1.0715	13875	1172	31	115	0.008073797	32.1556671	FALSE	0.194017984	0.349549489	1.105152961	0.950270105	0.437477401	0.7114233	0.69427015	0.863783634	0.564252154	1.399134892	0.561513416	0.810162021	0.161945918	0.712864741	0.238846805	0.253045001	0.666162046
PG4829	Cr_KLKL_F_349	CROSS	Final	0	FALSE	FALSE		TRUE	XX	0.821727019	0.036211699	1.077	12153.27	1395	20	0	0.019859433	46.81556956	FALSE	0.255157768	0.425070954	1.17153702	1.116407803	0.43922353	0.566843555	0.732395773	0.860015798	0.705489424	1.418795677	0.568324638	0.867750345	0.158229083	0.627897107	0.25285386	0.331927261	0.761276901
KY6717	Cr_KLKL_F_350	CROSS	Final	0	FALSE	FALSE		TRUE	XX	0.837711069	0.041275797	1.066	12010.15	1376	39	69	0.027754228	120.0156001	FALSE	0.214901625	0.405323948	1.028630249	0.919139495	0.420644327	0.63038365	0.827716797	0.785002913	0.582757254	1.393072098	0.54687093	0.943702059	0.155285366	0.631715857	0.19317	0.298497607	0.690666012
QK7521	Cr_KLKL_F_351	CROSS	Final	0	FALSE	FALSE		TRUE	XX	0.851661207	0.036967712	1.0685	14233.57	1116	31	1	0.008297826	26.91888132	FALSE	0.245335523	0.365614566	1.125719099	0.92640155	0.453926924	0.631464973	0.765584536	0.852491764	0.640176773	1.69072147	0.619380863	0.976986194	0.156180088	0.741346061	0.213579608	0.289316061	0.766638383
SN3655	Cr_KLKL_F_352	CROSS	Final	0	FALSE	FALSE		TRUE	XX	0.854089219	0.041821561	1.076	12823.63	1525	26	55	0.013348342	56.03206396	FALSE	0.210704752	0.389905167	1.011647945	0.915029445	0.473890739	0.586885257	0.766397595	0.826131067	0.71313655	1.484057045	0.669233228	0.824805389	0.134673245	0.666893797	0.244158615	0.282057397	0.730058434
ND5829	Cr_KLKL_F_353	CROSS	Final	0	FALSE	FALSE		TRUE	XX	0.875116063	0.027390901	1.077	12571.84	1538	27	122	0.012824511	16.86957426	FALSE	0.215640601	0.343545464	1.175563421	0.955070709	0.398907271	0.526891678	0.801075798	0.95427528	0.70093138	1.486337242	0.565549491	0.954513909	0.14946097	0.683272873	0.220094999	0.248491788	0.809268709
IG6994	Cr_KLKL_F_354	CROSS	Final	0	FALSE	FALSE		TRUE	XX	0.858208955	0.034514925	1.072	12842.22	1349	30	68	0.009696903	24.62589277	FALSE	0.284919565	0.371976158	1.077150135	0.991962377	0.395648076	0.645994182	0.735854028	0.808738618	0.697776502	1.478093245	0.672936562	0.97202813	0.178551671	0.663903856	0.263350087	0.330550302	0.760382496
LQ1727	Cr_KLKL_F_398	CROSS	Final	0	FALSE	FALSE		TRUE	XX	0.869726472	0.019471488	1.0785	16425.03	1256	40	76	0.018895234	51.0517893	FALSE	0.210227868	0.306666022	1.072813573	1.117927634	0.454002089	0.593727823	0.682799173	0.92103307	0.627456823	1.712142518	0.581003344	0.966877723	0.160304077	0.732235903	0.184596263	0.240608322	0.745325677
CT8033	Cr_KLKL_F_399	CROSS	Final	0	FALSE	FALSE		TRUE	XX	0.849630996	0.022601476	1.084	15014.76	1406	37	0	0.019790248	31.19514485	FALSE	0.174361752	0.316888165	1.037911973	1.05782571	0.419720306	0.588820569	0.762915917	0.960321659	0.69578198	1.484738938	0.529412363	1.044572086	0.149919138	0.775436929	0.192477259	0.271999005	0.736142264
VV2837	Cr_KLKL_F_408	CROSS	Final	0	FALSE	FALSE		TRUE	XX	0.855751391	0.029220779	1.078	13764.26	1524	19	122	0.019889084	32.88299867	FALSE	0.280291121	0.315309348	1.082949571	0.957842959	0.516264568	0.620302123	0.763862323	0.809705687	0.691501008	1.567610553	0.680385263	0.887515897	0.154893901	0.755870612	0.235900795	0.294167638	0.774469504
PL8075	Cr_KLKL_F_409	CROSS	Final	0	FALSE	FALSE		TRUE	XX	0.847926267	0.031336406	1.085	14085.08	1523	23	69	0.021597848	38.9933837	FALSE	0.237556256	0.385727178	1.082563596	0.959738634	0.428538422	0.5826731	0.90521287	0.845504319	0.681288055	1.464527928	0.640393733	0.924666072	0.141923179	0.686328848	0.207808476	0.292366008	0.797936271
XZ1749	Cr_KLKL_F_410	CROSS	Final	0	FALSE	FALSE		TRUE	XX	0.847936949	0.026889198	1.0785	16120.6	1332	24	62	0.019575005	36.87990164	FALSE	0.231815232	0.310534399	1.126943354	0.939171155	0.352964589	0.634529838	0.790789557	0.888428619	0.723980618	1.452241474	0.619704085	0.941032129	0.178591397	0.728819148	0.227348896	0.251665613	0.749103756
QD7506	Cr_KLKL_F_413	CROSS	Final	0	FALSE	FALSE		TRUE	XX	0.870232558	0.025116279	1.075	14944.83	1215	31	55	0.01786734	52.96740909	FALSE	0.255874484	0.382808035	1.13316799	0.981342884	0.383878639	0.721922022	0.720583767	0.885590691	0.632660369	1.364150919	0.640756816	0.850060003	0.133825567	0.768694058	0.239480852	0.25600831	0.778061848
FB7974	Cr_KLKL_F_414	CROSS	Final	0	FALSE	FALSE		TRUE	XX	0.851162791	0.03627907	1.075	12835.05	1402	27	56	0.013984186	24.24174155	FALSE	0.237708431	0.421657826	1.033264243	1.086088339	0.438175095	0.677208023	0.790647379	0.875960631	0.701516457	1.326991147	0.743744568	0.872454607	0.164159837	0.658898786	0.238877105	0.298869072	0.715540553
ZR0312	Cr_KLKL_F_415	CROSS	Final	0	FALSE	FALSE		TRUE	XX	0.85050598	0.036798528	1.087	14117.86	1790	21	96	0.024866022	33.82495877	FALSE	0.273766636	0.420318555	1.137140897	1.001213815	0.472946915	0.549799903	0.791975357	0.838512143	0.690260249	1.638916537	0.700601758	0.879524014	0.125373078	0.756559233	0.223192411	0.299407909	0.831641415
QA3351	Cr_KLKL_F_416	CROSS	Final	0	FALSE	FALSE		TRUE	XX	0.847694457	0.030740568	1.0735	15842.56	1068	23	69	0.018968812	67.38559647	FALSE	0.216000378	0.399493393	1.040614328	1.204034836	0.477637306	0.628244232	0.713899554	0.84077295	0.616377467	1.411008898	0.722042175	0.966888892	0.149344504	0.679119832	0.226857206	0.275965416	0.726460652
LB4826	Cr_KLKL_F_421	CROSS	Final	0	FALSE	FALSE		TRUE	XX	0.838604651	0.026976744	1.075	15297.04	1190	18	0	0.019694707	54.14544748	FALSE	0.204418692	0.39955454	1.011372429	0.972018399	0.485518908	0.514936373	0.698370607	0.917171171	0.57279072	1.464662871	0.632736975	0.713210083	0.128194773	0.627311087	0.176439415	0.260311875	0.707261218
NW5190	Cr_KLKL_F_422	CROSS	Final	0	FALSE	FALSE		TRUE	XX	0.82729805	0.037140204	1.077	13241.07	1312	26	45	0.011971228	31.58620664	FALSE	0.189486157	0.372552894	1.064868399	0.997955392	0.357146288	0.709081518	0.686726833	0.880442255	0.621550846	1.399508958	0.663919014	0.800614886	0.115927163	0.691862369	0.223244751	0.312361397	0.735438899
MQ1359	Cr_KLKL_F_58	CROSS	Final	0	FALSE	FALSE		TRUE	XX	0.881086142	0.029026217	1.068	10640.69	1390	25	123	0.010613881	30.55097174	FALSE	0.25289706	0.398564262	1.174547548	1.09494747	0.533517877	0.535867348	0.695067504	0.955952765	0.607949119	1.442199285	0.79665863	0.705311197	0.15967005	0.644412909	0.216245312	0.278929198	0.764705825
JW7946	Cr_KLKL_F_59	CROSS	Final	0	FALSE	FALSE		TRUE	XX	0.853624535	0.033457249	1.076	10101.36	1227	31	0	0.012212827	35.20678641	FALSE	0.17660991	0.400936175	1.090645392	1.083814628	0.49795283	0.567448433	0.663673115	0.955713045	0.62843033	1.472475226	0.60001831	0.767619531	0.179777801	0.568042413	0.186608565	0.276695459	0.684759388
FD9803	Cr_KLKL_F_60	CROSS	Final	0	FALSE	FALSE		TRUE	XX	0.835973905	0.027958993	1.073	11025.46	1470	29	0	0.013949045	42.52497756	FALSE	0.189289185	0.320893692	1.096553064	1.021635543	0.44370038	0.591086544	0.698292973	0.917240789	0.589907455	1.228701767	0.654848066	0.693667315	0.15119553	0.652761985	0.168065577	0.253141406	0.669722732
RZ2764	Cr_KLKL_F_63	CROSS	Final	0	FALSE	FALSE		TRUE	XX	0.851869159	0.036448598	1.07	10773.52	1297	20	21	0.010556776	27.57463553	FALSE	0.220540785	0.510975177	1.085810649	1.115977213	0.543740706	0.721398561	0.771428646	1.078941955	0.696244288	1.567083364	0.667284387	0.729659558	0.163270724	0.667191567	0.171160441	0.300737434	0.788878843
JN5993	Cr_KLKL_F_64	CROSS	Final	0	FALSE	FALSE		TRUE	XX	0.867006487	0.032437442	1.079	11718.13	1637	20	93	0.018001318	31.9574093	FALSE	0.180062793	0.411328275	1.226645774	1.131664784	0.511002845	0.6065812	0.744743125	1.12364303	0.70386631	1.366429118	0.69644192	0.61750444	0.133895034	0.613408225	0.154632123	0.322747622	0.804650272
SF6727	Cr_KLKL_F_65	CROSS	Final	0	FALSE	FALSE		TRUE	XX	0.871735075	0.035447761	1.072	12955.65	1315	26	63	0.008470239	25.26208882	FALSE	0.179226886	0.376052277	1.178250824	1.132865204	0.506342968	0.541385606	0.708031104	1.116038563	0.584069701	1.332469307	0.663494535	0.713820087	0.14325801	0.666504806	0.172125735	0.250469959	0.771246789
XF1135	Cr_KLKL_F_66	CROSS	Final	0	FALSE	FALSE		TRUE	XX	0.858818011	0.03564728	1.066	11674.88	1409	27	122	0.006448495	14.31134841	FALSE	0.229723912	0.477949078	1.14151028	1.141852895	0.538849041	0.619535068	0.791870829	0.995812899	0.710156954	1.442840899	0.663132932	0.7219772	0.127024818	0.692083969	0.188866974	0.332679967	0.830072493
GP4069	Cr_KLKL_F_67	CROSS	Final	0	FALSE	FALSE		TRUE	XX	0.880373832	0.037383178	1.07	11316.47	1280	23	122	0.011559411	29.98958243	FALSE	0.256970579	0.464985966	1.215573346	1.136396716	0.513499325	0.633943238	0.84346086	0.955421562	0.697037115	1.494547252	0.838600687	0.785492256	0.152079218	0.62183699	0.215084728	0.263686454	0.856892609
BI1988	Cr_KLKL_F_71	CROSS	Final	0	FALSE	FALSE		TRUE	XX	0.86372093	0.027906977	1.075	12650.02	1434	28	55	0.017238085	44.37813108	FALSE	0.180315916	0.398418333	1.064029914	1.034622847	0.432726579	0.529090061	0.689564112	1.191223386	0.517627628	1.3147805	0.608536574	0.784267517	0.129169753	0.643081973	0.158972077	0.235098437	0.744979043
BL6736	Cr_KLKL_F_72	CROSS	Final	0	FALSE	FALSE		TRUE	XX	0.843384759	0.039270687	1.0695	11968.9	1280	32	67	0.006370525	28.26775167	FALSE	0.257918409	0.441728094	1.149144734	1.147807936	0.47330994	0.56137149	0.818872149	1.041699618	0.623198384	1.370718955	0.730225751	0.739249135	0.142786706	0.63731831	0.156154683	0.331442283	0.665808811
IE8245	Cr_KLKL_F_73	CROSS	Final	0	FALSE	FALSE		TRUE	XX	0.867924528	0.039150943	1.06	11445.54	1076	29	82	0.013979794	28.79932104	FALSE	0.228473309	0.438598857	1.03245472	1.187012763	0.471187975	0.533308252	0.665499501	0.939667472	0.624784946	1.465199768	0.696253843	0.745006465	0.137782948	0.698175989	0.18068176	0.26193613	0.7346094
SE1886	Cr_KLKL_F_81	CROSS	Final	0	FALSE	FALSE		TRUE	XX	0.855876866	0.031716418	1.072	12087.45	1510	25	123	0.014866022	46.75392771	FALSE	0.197891252	0.43838869	1.167988587	1.239054049	0.4927426	0.601367689	0.776921719	1.164431178	0.673177726	1.455394194	0.685504564	0.647117632	0.125915755	0.608234317	0.163144461	0.235616341	0.709992779
SC4697	Cr_KLKL_F_82	CROSS	Final	0	FALSE	FALSE		TRUE	XX	0.844811321	0.03490566	1.06	12163.31	973	36	55	0.020725895	56.36902505	FALSE	0.159002808	0.390765433	1.133819921	1.093945897	0.4547283	0.636997807	0.626556567	0.86580071	0.594246276	1.289040863	0.633955871	0.70712676	0.153412223	0.636997807	0.152836722	0.201178837	0.705071398
XI3899	Cr_KLKL_F_83	CROSS	Final	0	FALSE	FALSE		TRUE	XX	0.869827987	0.027894003	1.0755	13801.34	1579	23	122	0.018375796	37.56814238	FALSE	0.175635168	0.380542863	1.287194205	1.223359807	0.570234641	0.575523984	0.756593408	1.207781605	0.664428419	1.32190099	0.70746773	0.872451755	0.134552189	0.685078593	0.145420702	0.309752616	0.7554341
TF7360	Cr_KLKL_F_84	CROSS	Final	0	FALSE	FALSE		TRUE	XX	0.867385192	0.039362699	1.067	11883	1048	38	69	0.019997804	53.27359924	FALSE	0.217116809	0.471429598	1.097618038	1.159976006	0.508288964	0.657241193	0.821930183	0.986787481	0.584111539	1.377092815	0.764621444	0.761591907	0.130270085	0.685264409	0.194816051	0.290330617	0.8488594
WQ1224	Cr_KLKL_F_85	CROSS	Final	0	FALSE	FALSE		TRUE	XX	0.854732896	0.032802249	1.067	11358.64	1040	32	0	0.013408741	37.34974112	FALSE	0.189635434	0.445211881	1.15498016	1.214934538	0.489671442	0.615654871	0.742782804	0.983744821	0.625867365	1.408179561	0.647260777	0.699115592	0.117971904	0.628596565	0.144119409	0.313946128	0.715666874
IC0177	Cr_KLKL_F_86	CROSS	Final	0	FALSE	FALSE		TRUE	XX	0.850279851	0.029850746	1.072	11971.75	1186	29	0	0.007972765	47.93299013	FALSE	0.192118946	0.381648462	1.174097349	1.300561734	0.540271888	0.556142583	0.707498901	0.983732533	0.631904272	1.346920871	0.721030757	0.680685778	0.114603128	0.577693317	0.206653162	0.278739531	0.652202056
UH9457	Cr_KLKL_F_87	CROSS	Final	0	FALSE	FALSE		TRUE	XX	0.862745098	0.025210084	1.071	12955.05	1250	23	33	0.012247968	35.31023504	FALSE	0.207100695	0.323966312	1.092392482	1.156768918	0.491159791	0.590966425	0.665917887	0.891930125	0.559009776	1.314853981	0.735697622	0.687453889	0.130142293	0.60215897	0.147201276	0.283210007	0.68699075
SX9005	Cr_KLKL_F_95	CROSS	Final	0	FALSE	FALSE		TRUE	XX	0.858878505	0.031775701	1.07	11176.2	1454	35	55	0.008440589	29.67501584	FALSE	0.232189919	0.429573719	1.115495845	1.193876719	0.458563905	0.612283474	0.664716342	0.955512964	0.538286918	1.369517879	0.735312814	0.762871386	0.101823556	0.63366821	0.218768536	0.288112346	0.734507531
UV0953	Cr_KLKL_F_96	CROSS	Final	0	FALSE	FALSE		TRUE	XX	0.881993418	0.029149036	1.0635	11158.37	1326	29	116	0.011288162	24.14259679	FALSE	0.180761109	0.383747679	1.194618534	1.076500963	0.402746864	0.604389152	0.690333576	3.750367324	0.684597973	1.376544688	0.609407805	0.647316555	0.150290719	0.592290615	0.154413183	0.248154443	0.64023667
LX9724	Cr_KLKL_F_97	CROSS	Final	0	FALSE	FALSE		TRUE	XX	0.831775701	0.029906542	1.07	11411.95	1383	45	123	0.032117285	232.2549358	FALSE	0.207063667	0.366370372	1.065199294	0.985283058	0.518228745	0.547233431	0.652474	0.994922078	0.649932804	1.240541823	0.583073059	0.630129	0.140203922	0.624871353	0.152121255	0.266562706	0.703648431
LL8313	Cr_KLKL_F_98	CROSS	Final	0	FALSE	FALSE		TRUE	XX	0.829608939	0.02886406	1.074	13723.62	1564	30	122	0.04519877	415.819832	FALSE	0.184426581	0.308883554	0.865369449	0.934301707	0.421025991	0.577763082	0.61798571	1.030194785	0.52639179	1.243622464	0.443104717	0.724007312	0.124675575	0.545337231	0.192733428	0.236307942	0.639554366
CU5953	Cr_LKKL_F_156	CROSS	Final	0	FALSE	FALSE		TRUE	XX	0.868691589	0.03364486	1.07	11334.29	879	23	54	0.019805623	39.57337565	FALSE	0.181661123	0.41299452	1.082202689	1.023972314	0.474312869	0.522132359	0.69241209	0.900012198	0.622006274	1.405469495	0.667620067	0.64503374	0.148928594	0.671325637	0.166574162	0.317796681	0.712704494
ED8184	Cr_LKKL_F_157	CROSS	Final	0	FALSE	FALSE		TRUE	XX	0.869789227	0.02529274	1.0675	12115.85	1242	32	112	0.015754448	39.03928785	FALSE	0.20031614	0.449411365	1.086923466	0.993574659	0.569997225	0.474007249	0.63016635	0.869027046	0.60524032	1.3975084	0.700239857	0.616465287	0.173409234	0.619106456	0.167136458	0.212449009	0.74051768
QN0055	Cr_LKKL_F_158	CROSS	Final	0	FALSE	FALSE		TRUE	XX	0.869646182	0.025139665	1.074	12952.18	1091	40	64	0.010041731	34.58396287	FALSE	0.170782062	0.402866546	1.088311006	0.966709854	0.471272019	0.483625152	0.500842331	0.843024112	0.572490502	1.357840924	0.646918127	0.680348793	0.126619612	0.617116194	0.145072104	0.233551418	0.653094694
SH9069	Cr_LKKL_F_159	CROSS	Final	0	FALSE	FALSE		TRUE	XX	0.881419234	0.029878618	1.071	11698.3	1267	24	121	0.005256973	17.2570288	FALSE	0.202080657	0.410657985	1.195643887	1.202055076	0.477590791	0.61675632	0.792080951	1.022969214	0.662318499	1.473718497	0.761050799	0.794388979	0.142755794	0.663600736	0.196780741	0.289101854	0.747886493
RR7822	Cr_LKKL_F_160	CROSS	Final	0	FALSE	FALSE		TRUE	XX	0.845293569	0.033550792	1.073	11517.88	1200	26	0	0.007970569	24.83462118	FALSE	0.185971718	0.467881226	1.140140334	1.128766713	0.510857883	0.496705974	0.679118009	1.038211857	0.635273136	1.479091587	0.593946088	0.676600184	0.137264839	0.610876286	0.184582573	0.273227355	0.761424819
QK8116	Cr_LKKL_F_161	CROSS	Final	0	FALSE	FALSE		TRUE	XX	0.883612663	0.027932961	1.074	12479.76	1511	28	121	0.011298045	25.2064322	FALSE	0.193593445	0.370199385	1.0242183	1.080228986	0.483102185	0.497525538	0.615155992	1.312605224	0.56691789	1.428312564	0.608585353	0.662192147	0.126925504	0.721568283	0.156012598	0.218193274	0.699131956
XF2911	Cr_LKKL_F_162	CROSS	Final	0	FALSE	FALSE		TRUE	XX	0.856138707	0.027179007	1.067	12126.58	1212	37	68	0.011359543	50.8738162	FALSE	0.185295454	0.383620138	1.134285254	0.998138038	0.394670245	0.527106604	0.610312262	0.898769537	0.583429165	1.338629773	0.611466751	0.614023119	0.129220283	0.532796585	0.150990643	0.241205697	0.69211604
JM5694	Cr_LKKL_F_231	CROSS	Final	0	FALSE	FALSE		TRUE	XX	0.877102804	0.028037383	1.07	10945.6	1148	24	55	0.021649462	68.90346855	FALSE	0.230686392	0.445293257	1.133697994	1.112959059	0.497643079	0.656611127	0.748977045	0.946590774	0.614676453	1.448527818	0.66647811	0.745231246	0.134391953	0.614311009	0.172946273	0.336573729	0.827912903
KQ2564	Cr_LKKL_F_232	CROSS	Final	0	FALSE	FALSE		TRUE	XX	0.878116343	0.023084026	1.083	11841.22	1752	27	123	0.023577861	52.09352567	FALSE	0.21298476	0.483649373	1.055211964	1.019489302	0.487196304	0.56463763	0.693425005	0.942723581	0.610494381	1.371395524	0.715382196	0.76959957	0.146184226	0.587101526	0.152940285	0.276322813	0.662093781
KS2094	Cr_LKKL_F_233	CROSS	Final	0	FALSE	FALSE		TRUE	XX	0.860130112	0.020446097	1.076	14134.46	1533	17	122	0.015541401	30.04937931	FALSE	0.177509468	0.352259722	1.079772619	1.031026496	0.439351852	0.510525437	0.663131225	0.848918337	0.518803081	1.280983032	0.629383909	0.655702571	0.142488668	0.674168083	0.15869021	0.241749642	0.656622309
NW5466	Cr_LKKL_F_240	CROSS	Final	0	FALSE	FALSE		TRUE	XX	0.87593985	0.030075188	1.064	10979.88	1317	32	122	0.006833956	20.01907308	FALSE	0.213845605	0.498639133	1.036987246	0.919226443	0.396907643	0.595543615	0.770044543	0.841903224	0.603011818	1.270960568	0.716127764	0.698914468	0.163116473	0.652830193	0.267307006	0.276687797	0.802467471
SM9113	Cr_LKKL_F_241	CROSS	Final	0	FALSE	FALSE		TRUE	XX	0.847947761	0.03125	1.072	10780.99	1085	33	48	0.007434658	36.36271276	FALSE	0.213894986	0.422966668	1.228829479	1.080883901	0.46850979	0.611353796	0.769038739	0.907801488	0.526945974	1.367499472	0.712086648	0.776459207	0.133753933	0.593637429	0.187552325	0.352843247	0.720712942
LJ6029	Cr_LKKL_F_386	CROSS	Final	0	FALSE	FALSE		TRUE	XX	0.860093897	0.028169014	1.065	13889.27	1074	33	56	0.014237865	58.83834869	FALSE	0.180570986	0.343070474	1.036555217	1.141384306	0.472522879	0.584407772	0.662813595	1.025323529	0.564176334	1.203302587	0.598663376	0.813721405	0.133484293	0.638910259	0.201522404	0.267904561	0.706372386
LD1466	Cr_LKKL_F_387	CROSS	Final	0	FALSE	FALSE		TRUE	XX	0.841545894	0.030917874	1.035	12049.27	1086	72	65	0.078821656	1208.657096	FALSE	0.232213266	0.257608999	0.642030674	0.585097758	0.268895991	0.375541469	0.627921934	0.527500901	0.393965824	0.847769305	0.355457262	0.639789875	0.116770574	0.456210266	0.199680171	0.239350629	0.511068368
YD5082	Cr_LKKL_F_388	CROSS	Final	0	FALSE	FALSE		TRUE	XX	0.854527938	0.034682081	1.038	11771.28	1103	69	0	0.075768724	1295.257186	FALSE	0.214080281	0.248570993	0.62338139	0.544630429	0.295124959	0.390356703	0.591099443	0.507421237	0.379397831	0.891151646	0.309227073	0.570625892	0.106530426	0.421449315	0.246617086	0.260039579	0.548878054
FX3139	Cr_LKKL_F_389	CROSS	Final	0	FALSE	FALSE		TRUE	XX	0.811302682	0.031609195	1.044	13092.49	1383	67	0	0.070288821	1300.430694	FALSE	0.218598666	0.268016323	0.627993791	0.547260461	0.24693553	0.362650756	0.556426023	0.557037061	0.378690491	0.935269273	0.36181058	0.634638823	0.112201761	0.40809667	0.140844144	0.278938619	0.464617639
FY8327	Cr_LKKL_F_390	CROSS	Final	0	FALSE	FALSE		TRUE	XX	0.847947761	0.032182836	1.072	15330.91	1428	26	61	0.021306831	117.4793472	FALSE	0.213881666	0.303634997	1.002876065	1.080953636	0.5093632	0.496317657	0.666366301	0.939800868	0.611314113	1.346039056	0.576808653	0.71685255	0.129933601	0.633100168	0.166787258	0.244343007	0.650385512
RA0148	Cr_LKKL_F_391	CROSS	Final	0	FALSE	FALSE		TRUE	XX	0.845693229	0.027637034	1.0855	15580.54	1428	30	69	0.020248188	33.54222133	FALSE	0.25121088	0.28830845	0.967168307	1.01742332	0.390551407	0.639515894	0.76428696	0.807032603	0.621737301	1.666759159	0.702158158	1.034688452	0.134013367	0.724236989	0.226179648	0.23593541	0.731489628
JV1777	Cr_LKKL_F_392	CROSS	Final	0	FALSE	FALSE		TRUE	XX	0.875698324	0.025139665	1.074	17106.02	1224	19	122	0.021719745	49.35780988	FALSE	0.213375132	0.328305409	1.012216551	1.073715356	0.375598691	0.659650682	0.67409004	0.912777893	0.638430087	1.359871868	0.583946354	0.924820435	0.192388372	0.702442626	0.15222708	0.244007617	0.738394874
BT7570	Cr_LKKL_F_393	CROSS	Final	0	FALSE	FALSE		TRUE	XX	0.838994881	0.025127966	1.0745	15176.08	1037	29	69	0.016016912	37.4970216	FALSE	0.249207972	0.435685645	1.070764025	1.010076414	0.439441556	0.649311305	0.754476805	0.763372383	0.688583634	1.615898226	0.661765114	0.900693751	0.170597419	0.756190027	0.205718479	0.268251098	0.873677551
GM0764	Cr_LKKL_F_52	CROSS	Final	0	FALSE	FALSE		TRUE	XX	0.887951242	0.031879981	1.0665	11948.8	1095	36	107	0.014169778	41.45353723	FALSE	0.179599615	0.477872228	1.164300953	1.082953877	0.525994213	0.521558621	0.726349049	1.01583417	0.607843432	1.442153107	0.625167346	0.698814905	0.16210832	0.623660919	0.152902375	0.262955261	0.782170551
YS4929	Cr_LKKL_F_53	CROSS	Final	0	FALSE	FALSE		TRUE	XX	0.846901018	0.031452359	1.081	11187.96	1685	29	55	0.018144081	42.50966965	FALSE	0.194941656	0.485611194	1.268774325	1.132020206	0.574099154	0.69512208	0.798179269	1.179839456	0.671972199	1.452006967	0.695300843	0.801128867	0.154630474	0.708976255	0.195746092	0.319182326	0.844657793
AG1133	Cr_LKLK_F_223	CROSS	Final	0	FALSE	FALSE		TRUE	XX	0.859082397	0.031835206	1.068	10377.3	1061	30	69	0.013714035	35.41656171	FALSE	0.206508463	0.430362481	1.220934313	1.060969754	0.470449985	0.565368714	0.719455057	0.910834343	0.676476628	1.405279012	0.698158571	0.818806539	0.1324044	0.676958449	0.180971953	0.32918008	0.687943967
CP4698	Cr_LKLK_F_224	CROSS	Final	0	FALSE	FALSE		TRUE	XX	0.858534323	0.029684601	1.078	11505.84	1566	34	56	0.021803207	56.17377516	FALSE	0.226667574	0.414224561	1.104482947	1.113348013	0.445339205	0.63315693	0.662533326	1.025827213	0.502614486	1.259882342	0.722589803	0.716940497	0.129064934	0.594828556	0.166871833	0.266647284	0.661142727
YS2468	Cr_LKLK_F_225	CROSS	Final	0	FALSE	FALSE		TRUE	XX	0.88411215	0.024299065	1.07	13035.28	1083	22	122	0.020911487	66.8216549	FALSE	0.223777388	0.396309216	1.109681149	1.034653968	0.438962705	0.509233561	0.594924114	0.800213209	0.63159384	1.323178739	0.687288864	0.670795158	0.152125663	0.520280508	0.173298978	0.255690789	0.683836693
EB6844	Cr_LKLK_F_244	CROSS	Final	0	FALSE	FALSE		TRUE	XX	0.868347339	0.024276377	1.071	12126.77	1180	23	119	0.015679772	51.24312225	FALSE	0.230234484	0.360442311	1.170798428	1.09617013	0.47770357	0.622012434	0.615992693	1.015357166	0.576823144	1.261424394	0.697382892	0.765579138	0.118745579	0.583585045	0.155276338	0.2188547	0.679900904
ZF4184	Cr_LKLK_F_245	CROSS	Final	0	FALSE	FALSE		TRUE	XX	0.850553506	0.02398524	1.084	13917.62	1723	22	55	0.020785197	50.60134142	FALSE	0.215266754	0.410199566	1.235700147	1.170746494	0.443251204	0.656434268	0.662613487	0.914524449	0.632938865	1.297348637	0.597156874	0.668361598	0.119488856	0.605994595	0.167988542	0.268724186	0.651260968
CP7350	Cr_LKLK_F_246	CROSS	Final	0	FALSE	FALSE		TRUE	XX	0.831784387	0.031133829	1.076	11064.38	1397	29	2	0.013119921	33.2016216	FALSE	0.209501158	0.46130022	1.141591512	1.091069016	0.495825432	0.633745522	0.760277714	0.904434032	0.642150874	1.347658225	0.763621779	0.887442567	0.145873541	0.597412707	0.192961593	0.318228463	0.675953046
ZH6429	Cr_LKLK_F_247	CROSS	Final	0	FALSE	FALSE		TRUE	XX	0.861473881	0.029850746	1.072	10550.74	1198	30	121	0.01336152	27.67719915	FALSE	0.209274369	0.450300057	1.111201403	1.156506271	0.503092549	0.633699469	0.780134659	0.888373486	0.579769616	1.320001871	0.750089381	0.790086566	0.157524457	0.696633428	0.163779941	0.299504984	0.805535715
RU2097	Cr_LKLK_F_248	CROSS	Final	0	FALSE	FALSE		TRUE	XX	0.864359214	0.024321796	1.069	11759.72	1219	30	122	0.017949703	57.62364812	FALSE	0.201195278	0.392951556	1.065501621	1.114227274	0.434704253	0.562598462	0.63334845	1.052235998	0.581136319	1.353348627	0.634283846	0.703333113	0.132401119	0.640151333	0.172453096	0.295415214	0.72833371
MR4095	Cr_LKLK_F_360	CROSS	Final	0	FALSE	FALSE		TRUE	XX	0.842557252	0.033874046	1.048	11533.66	763	53	81	0.05352405	387.0759241	FALSE	0.207739729	0.32964376	0.838502052	0.800006043	0.344383223	0.592179611	0.674720605	0.665876927	0.502355588	1.159215432	0.459351036	0.704199532	0.139417982	0.469668661	0.192133238	0.339614573	0.65165768
ML0228	Cr_LKLK_F_361	CROSS	Final	0	FALSE	FALSE		TRUE	XX	0.817833174	0.039309684	1.043	10720.2	1204	79	15	0.080880738	1570.437064	FALSE	0.250928203	0.365758172	0.770694725	0.601574714	0.318930679	0.590101045	0.755209937	0.569205908	0.440570224	1.068823549	0.358388905	0.71174059	0.109512903	0.454562503	0.278819479	0.392623348	0.62946599
IE5172	Cr_LKLK_F_362	CROSS	Final	0	FALSE	FALSE		TRUE	XX	0.835343228	0.037105751	1.078	13805.07	1428	27	10	0.02011421	82.30800431	FALSE	0.239259846	0.410935848	1.213104644	1.085325544	0.497643094	0.620641344	0.797822568	0.967687642	0.666421611	1.540013419	0.738568994	0.947984742	0.158782193	0.664320934	0.224410234	0.305539821	0.768413093
YB0204	Cr_LKLK_F_363	CROSS	Final	0	FALSE	FALSE		TRUE	XX	0.853051643	0.038497653	1.065	11667.83	1248	39	65	0.031348561	212.7457307	FALSE	0.163440841	0.408902074	1.055980392	0.905224	0.383790293	0.545174196	0.668504753	0.647078318	0.532918276	1.191823986	0.520662355	0.672961451	0.140643115	0.529404341	0.261145382	0.277429472	0.640907505
VQ6933	Cr_LKLK_F_369	CROSS	Final	0	FALSE	FALSE		TRUE	XX	0.807710843	0.037590361	1.0375	9769.16	1151	75	2	0.084531078	1530.05785	FALSE	0.242190684	0.288151638	0.703847483	0.556240143	0.282828766	0.452034684	0.6240044	0.433506994	0.397168155	0.874179393	0.309340764	0.580602519	0.077181647	0.390719291	0.169717732	0.267679053	0.490011329
ZB8187	Cr_LKLK_F_370	CROSS	Final	0	FALSE	FALSE		TRUE	XX	0.801363194	0.041869523	1.027	10167.99	1121	81	2	0.083871074	1325.174365	FALSE	0.24380426	0.254032434	0.747345127	0.571990954	0.235444695	0.441680085	0.623131823	0.463709998	0.39939052	0.978265822	0.349724868	0.60837965	0.10267513	0.424174172	0.189712956	0.223937999	0.561566085
TE1898	Cr_LKLK_F_371	CROSS	Final	0	FALSE	FALSE		TRUE	XX	0.828837209	0.033488372	1.075	13343.33	1405	30	2	0.018949045	60.35335962	FALSE	0.200324813	0.363702326	1.111116975	1.125805962	0.41901086	0.60119927	0.686485329	0.942268564	0.711741394	1.485910985	0.653435107	0.927279801	0.143592346	0.648863535	0.183537399	0.279990086	0.775593523
JR6461	Cr_LKLK_F_372	CROSS	Final	0	FALSE	FALSE		TRUE	XX	0.811365807	0.033428844	1.047	11182.93	1030	50	66	0.06412036	868.6149887	FALSE	0.203077376	0.271932321	0.726464378	0.656089259	0.256641158	0.444963903	0.590453507	0.471611661	0.426364125	0.991690048	0.37217439	0.592241947	0.110704444	0.4002529	0.214076283	0.287849438	0.595461139
AA4846	Cr_LKLK_F_373	CROSS	Final	0	FALSE	FALSE		TRUE	XX	0.843297975	0.038090646	1.037	10199.07	1320	75	121	0.076351856	1106.851572	FALSE	0.211489775	0.250414876	0.719378991	0.592308639	0.293065804	0.432294121	0.611820213	0.421018589	0.45004083	0.909200133	0.331010423	0.581915539	0.095694956	0.390133434	0.184428497	0.279535165	0.532107099
YL1668	Cr_LKLK_F_374	CROSS	Final	0	FALSE	FALSE		TRUE	XX	0.827733081	0.03691434	1.0565	11556.96	1261	61	55	0.059617834	803.0687349	FALSE	0.187333066	0.301290409	0.774079263	0.691012408	0.321278371	0.508265325	0.558970718	0.602321233	0.445186431	1.066111179	0.379771282	0.586486614	0.085403111	0.405297034	0.166133712	0.22774163	0.41490164
UV0629	Cr_LTWV_1005	CROSS	Final	0	FALSE	FALSE		TRUE	XX	0.840909091	0.027272727	1.1	12784.21	2480	33	168	0.051198111	206.9825647	FALSE	0.210181129	0.44578424	1.284944325	1.323351074	0.462210752	0.706027119	0.742400109	0.945071975	0.632264259	1.404779639	0.704697353	0.856212369	0.123355281	0.680135807	0.20759982	0.254063381	0.777286891
CI7287	Cr_LTWV_1023	CROSS	Final	0	FALSE	FALSE		TRUE	XX	0.784747292	0.025270758	1.108	12883.58	2475	14	52	0.066881177	462.2918022	FALSE	0.203747741	0.447624085	1.333868544	1.113510511	0.548139637	0.601696186	0.753672596	1.119642348	0.744203177	1.614303054	0.854731475	0.840760202	0.169285266	0.681720537	0.170760011	0.301080947	0.789066489
ZL2221	Cr_LTWV_1039	CROSS	Final	0	FALSE	FALSE		TRUE	XX	0.832278481	0.023508137	1.106	14305.36	2783	19	167	0.06297606	357.4233688	FALSE	0.247599423	0.425434807	1.303986344	1.29699596	0.507362115	0.653531057	0.767334518	0.992914229	0.652622307	1.624215863	0.787257114	0.918606441	0.168887692	0.80207673	0.217331057	0.311421634	0.783761922
BJ3972	Cr_LTWV_1061	CROSS	Final	0	FALSE	FALSE		TRUE	XX	0.800446429	0.028571429	1.12	13967.16	2478	32	69	0.084785855	704.1474904	FALSE	0.29032396	0.428505278	1.369355379	1.238834891	0.548787461	0.647161104	0.731358632	1.105378945	0.692624905	1.770653973	0.715535797	0.976075598	0.137823335	0.773743782	0.237772102	0.304571671	0.997984138
DU6216	Cr_LTWV_1068	CROSS	Final	0	FALSE	FALSE		TRUE	XX	0.812556459	0.028906956	1.107	12310.21	2495	29	69	0.067113991	341.3071306	FALSE	0.279930148	0.479520506	1.268783803	1.090476584	0.485044374	0.660670892	0.691783268	0.93792034	0.645399021	1.36382683	0.761562722	0.769929757	0.132004205	0.698444403	0.175220351	0.269775979	0.779515293
JL2075	Cr_LTWV_1079	CROSS	Final	0	FALSE	FALSE		TRUE	XX	0.843438914	0.027149321	1.105	12789.06	2685	22	109	0.062318252	369.5517102	FALSE	0.204002439	0.429976778	1.214866194	1.070836875	0.507543056	0.578384838	0.734768464	1.207125204	0.663379339	1.417304797	0.680816113	0.829224174	0.136992056	0.647271825	0.15356872	0.27867562	0.682067182
GA8437	Cr_LTWV_1134	CROSS	Final	0	FALSE	FALSE		TRUE	XX	0.801980198	0.02340234	1.111	14217.01	2915	42	166	0.084620031	785.3312114	FALSE	0.214742786	0.386368203	1.198705064	1.036223624	0.446085407	0.568122333	0.68312543	1.132587075	0.632200511	1.784200953	0.712737848	1.075120696	0.178026201	0.736793542	0.217556317	0.305690189	0.756277247
NS5530	Cr_LTWV_1141	CROSS	Final	0	FALSE	FALSE		TRUE	XX	0.792225201	0.032171582	1.119	13966.83	2502	24	69	0.077783879	544.6883809	FALSE	0.236632112	0.430233694	1.275307466	1.102898956	0.525029736	0.589396534	0.760444678	0.99786437	0.694717513	1.512941953	0.731161006	0.905789061	0.192169618	0.65304735	0.250450568	0.287180454	0.800897671
BQ7037	Cr_LTWV_1164	CROSS	Final	0	FALSE	FALSE		TRUE	XX	0.790687161	0.028933092	1.106	11350.72	2611	35	107	0.090416209	1216.882849	FALSE	0.239191851	0.489043818	1.397708553	1.209967177	0.49706093	0.632470829	0.755458609	0.973065929	0.738807685	1.679893267	0.811842692	0.835541627	0.169240349	0.649562254	0.212497512	0.324472777	0.771580933
CV0149	Cr_LTWV_1187	CROSS	Final	0	FALSE	FALSE		TRUE	XX	0.865576748	0.026339691	1.101	12801.19	2925	28	166	0.048664617	166.5127827	FALSE	0.203496745	0.400041009	1.233713661	1.104038192	0.438553061	0.638534507	0.722823561	0.830782295	0.605803168	1.329017318	0.657360885	0.751492776	0.135768653	0.612833766	0.158657155	0.285754738	0.724776505
GY0948	Cr_LTWV_1190	CROSS	Final	0	FALSE	FALSE		TRUE	XX	0.803345389	0.023508137	1.106	14552.62	2928	27	166	0.070250384	490.2891743	FALSE	0.178180916	0.399996572	1.131342305	1.135671421	0.465826621	0.625385466	0.70124807	0.963674957	0.647237195	1.636611983	0.673074458	0.965186711	0.139699885	0.734644107	0.197009134	0.217142959	0.784394583
SU8614	Cr_LTWV_1191	CROSS	Final	0	FALSE	FALSE		TRUE	XX	0.810991957	0.025915996	1.119	15685.16	2933	43	166	0.073332967	421.2849856	FALSE	0.231556387	0.380614436	1.250991033	1.124502081	0.509908586	0.703977321	0.794699991	0.931835946	0.767731832	1.735780341	0.752239486	1.066166703	0.171754655	0.74650158	0.234042813	0.286257758	0.862024756
RM3834	Cr_LTWV_1210	CROSS	Final	0	FALSE	FALSE		TRUE	XX	0.788166215	0.037940379	1.107	11178.29	2896	39	167	0.084572809	990.0241222	FALSE	0.268198541	0.497213974	1.305924719	1.157601443	0.565024012	0.684094145	0.903805825	1.175045977	0.754587957	1.579311891	0.84306306	0.968305874	0.162994577	0.717462409	0.219174925	0.328941306	0.841810632
XN4186	Cr_LTWV_1228	CROSS	Final	0	FALSE	FALSE		TRUE	XX	0.80643699	0.033091568	1.103	11776.06	2471	18	55	0.071913024	628.7279574	FALSE	0.261547553	0.47053084	1.230462349	1.105717754	0.545513467	0.728936426	0.720869212	1.174756117	0.630516421	1.404374488	0.659728226	0.834319709	0.136378367	0.721208884	0.208813452	0.293391816	0.685033801
FD3021	Cr_LTWV_1238	CROSS	Final	0	FALSE	FALSE		TRUE	XX	0.795207957	0.03074141	1.106	12707.83	2481	16	52	0.079895673	803.8297949	FALSE	0.199640753	0.441617621	1.039910345	1.147560542	0.463179137	0.592154775	0.653298198	1.569505246	0.58766935	1.411020234	0.744344453	0.752843153	0.115440672	0.70539208	0.174538112	0.256377443	0.781722994
ES5697	Cr_LTWV_1244	CROSS	Final	0	FALSE	FALSE		TRUE	XX	0.840196956	0.028648165	1.117	15624.69	2943	30	166	0.064445421	285.8425969	FALSE	0.224772405	0.406343963	1.113941829	0.998867574	0.494665693	0.625676261	0.817936028	0.958994792	0.75374277	1.6074555	0.725262212	0.984339289	0.173315396	0.671629161	0.237444653	0.28269354	0.842704514
EI4835	Cr_LTWV_1276	CROSS	Final	0	FALSE	FALSE		TRUE	XX	0.826344576	0.035095716	1.097	12042.19	2784	28	167	0.062864046	387.2848285	FALSE	0.257428299	0.445018792	1.162745499	0.983043938	0.467190843	0.567670921	0.747787689	0.988109462	0.606949497	1.403565521	0.681686745	0.79096921	0.152630069	0.657853867	0.231187221	0.338227569	0.745545571
NQ6427	Cr_LTWV_1281	CROSS	Final	0	FALSE	FALSE		TRUE	XX	0.808743169	0.031876138	1.098	11930.5	2460	41	166	0.068173732	544.1139116	FALSE	0.233435327	0.430074205	1.265998985	1.179414176	0.412388441	0.598466152	0.800804708	0.978249083	0.533590409	1.355182176	0.722853234	0.807761667	0.146766699	0.623360332	0.182389684	0.305603304	0.752525085
SY9384	Cr_LTWV_1284	CROSS	Final	0	FALSE	FALSE		TRUE	XX	0.869863014	0.03196347	1.095	13586.34	2471	37	135	0.039972546	107.4931774	FALSE	0.220147602	0.384724679	1.052086199	1.065408405	0.471797435	0.572118793	0.649917528	0.928358978	0.585956222	1.325007399	0.751342936	0.726391402	0.119752641	0.683922273	0.131529176	0.269903463	0.690767384
WB3880	Cr_LTWV_1290	CROSS	Final	0	FALSE	FALSE		TRUE	XX	0.758544163	0.036395917	1.1265	13352.12	2516	75	70	0.129371843	2144.165762	FALSE	0.284449162	0.382486011	1.24916471	1.214713258	0.444049258	0.626192586	0.860537354	2.902160352	0.835672393	1.784285632	0.691800134	0.958798886	0.131589567	0.703558564	0.187086363	0.26527618	0.932361141
CF6491	Cr_LTWV_1291	CROSS	Final	0	FALSE	FALSE		TRUE	XX	0.775482712	0.035922766	1.1135	11480.58	2510	35	69	0.090512849	935.0140448	FALSE	0.265230515	0.489609434	1.362997407	1.142712358	0.454767987	0.655454722	0.812763855	1.002736845	0.672962549	1.526055379	0.742122821	0.833146102	0.139975513	0.676446694	0.228559892	0.287790352	0.854138073
PU0104	Cr_LTWV_1292	CROSS	Final	0	FALSE	FALSE		TRUE	XX	0.815503173	0.036264733	1.103	11300.63	2904	39	165	0.081459477	864.2937946	FALSE	0.196272246	0.416348475	1.121530408	1.21683483	0.51342271	0.597665802	0.740224228	0.963751592	0.703500611	1.447618427	0.641557161	0.780221998	0.135833137	0.685802482	0.163442217	0.283081567	0.68553701
UG9853	Cr_LTWV_1313	CROSS	Final	0	FALSE	FALSE		TRUE	XX	0.851228389	0.034121929	1.099	13679.76	2803	21	167	0.044430046	173.2814818	FALSE	0.206509468	0.441016503	1.133938006	1.057182275	0.440943402	0.593431455	0.745188502	0.845555758	0.63904629	1.311280296	0.671064395	0.764779488	0.110966858	0.70929606	0.200588312	0.292914491	0.68626934
UL3590	Cr_LTWV_1325	CROSS	Final	0	FALSE	FALSE		TRUE	XX	0.809372157	0.040036397	1.099	13307.6	2443	33	134	0.05248188	223.3862241	FALSE	0.281869077	0.392407443	1.229598429	1.133112186	0.450494566	0.732814513	0.876266411	0.939162816	0.702080188	1.602167579	0.750248164	1.046695381	0.149989517	0.776624076	0.303285416	0.413823782	0.864919508
DK4293	Cr_LTWV_1333	CROSS	Final	0	FALSE	FALSE		TRUE	XX	0.770027003	0.03240324	1.111	10360.7	2497	44	69	0.101312322	1385.892268	FALSE	0.232995916	0.380572865	1.069812234	1.143842005	0.448039371	0.62129027	0.804193029	0.976961334	0.609225444	1.367958209	0.617526044	0.819636006	0.147963024	0.750239128	0.233478509	0.265136612	0.753231205
WU3505	Cr_LTWV_1337	CROSS	Final	0	FALSE	FALSE		TRUE	XX	0.822141561	0.0353902	1.102	11741.87	2906	49	165	0.066981111	457.4660942	FALSE	0.19758349	0.387331772	1.166338747	1.03407704	0.477181161	0.594283445	0.684899321	0.994304847	0.571033319	1.424389598	0.610635182	0.7733009	0.148017287	0.518656661	0.19775382	0.287518044	0.715643994
KK3948	Cr_LTWV_1360	CROSS	Final	0	FALSE	FALSE		TRUE	XX	0.826205641	0.030937216	1.099	13191.52	2482	18	50	0.056824072	285.8132703	FALSE	0.262896244	0.361368626	1.184170192	1.083878459	0.502140923	0.708713087	0.736079161	0.939543266	0.551035985	1.342150519	0.6511003	0.713488884	0.139331977	0.609710061	0.191335098	0.327634823	0.753969447
YM9173	Cr_LTWV_1365	CROSS	Final	0	FALSE	FALSE		TRUE	XX	0.805	0.035454545	1.1	12583.61	2918	40	167	0.067746541	567.1904391	FALSE	0.20900198	0.423407812	1.126067699	1.074333749	0.402507615	0.557073717	0.728010317	0.846656688	0.634317034	1.352393797	0.632171387	0.752486595	0.117295408	0.581311589	0.194379788	0.265583504	0.685415237
PD1833	Cr_LTWV_1370	CROSS	Final	0	FALSE	FALSE		TRUE	XX	0.788374205	0.031789282	1.101	10992.36	2458	23	52	0.075082363	780.4997555	FALSE	0.21414872	0.380718944	1.085754025	0.983501195	0.461411346	0.555658616	0.705944804	0.894348372	0.563573204	1.383870149	0.668464229	0.690297574	0.150832021	0.643537828	0.181489676	0.293476538	0.751067049
UY5203	Cr_LTWV_1371	CROSS	Final	0	FALSE	FALSE		TRUE	XX	0.86040146	0.032846715	1.096	12127.48	2457	23	50	0.035593016	82.21527599	FALSE	0.202515331	0.442631228	1.194560098	1.137004845	0.528634278	0.684313816	0.750279722	1.179305482	0.592456292	1.350816838	0.573408637	0.757206142	0.116429824	0.645311474	0.175386852	0.310781874	0.750856924
EH9943	Cr_LTWV_1379	CROSS	Final	0	FALSE	FALSE		TRUE	XX	0.865454545	0.03	1.1	13591.8	2826	30	211	0.053689875	221.3422645	FALSE	0.190188197	0.348813246	1.065568918	1.07888577	0.542312262	0.615223869	0.674303606	0.870966295	0.629276459	1.420341639	0.574905442	0.808207869	0.122279607	0.675922229	0.198134164	0.273694426	0.733236196
PW1103	Cr_LTWV_1404	CROSS	Final	0	FALSE	FALSE		TRUE	XX	0.744098206	0.032577904	1.059	11128.78	2727	67	136	0.11292774	3656.452433	FALSE	0.168122621	0.288171698	0.759022866	0.716610318	0.299313977	0.460877031	0.715082748	0.562595261	0.520631998	1.037849426	0.423316766	0.706007181	0.109086511	0.452160893	0.236234298	0.283948415	0.554687836
FH8581	Cr_LTWV_1431	CROSS	Final	0	FALSE	FALSE		TRUE	XX	0.821028037	0.03271028	1.07	11123.73	2740	45	140	0.062969471	1024.285528	FALSE	0.222137629	0.344938115	0.803866724	0.758558199	0.428093641	0.50693407	0.726644457	0.658501874	0.480054608	1.097023667	0.399955609	0.58955021	0.100595713	0.445264134	0.177188695	0.337656387	0.633959756
TX1103	Cr_LTWV_1441	CROSS	Final	0	FALSE	FALSE		TRUE	XX	0.77259887	0.035310734	1.062	11219.51	2736	54	140	0.086716451	1953.386362	FALSE	0.177013017	0.338071689	0.909843343	0.7652738	0.378091248	0.489860797	0.709121634	0.720352067	0.537902094	1.027762891	0.506528186	0.663308597	0.09519129	0.511786881	0.179241278	0.308391259	0.637549905
ZM6393	Cr_LTWV_1444	CROSS	Final	0	FALSE	FALSE		TRUE	XX	0.798085688	0.030082042	1.097	14524	2758	42	141	0.086300242	1159.691841	FALSE	0.260740776	0.340402006	1.061828426	1.180459626	0.459997128	0.592605191	0.753511237	1.075116773	0.676397514	1.332139566	0.62703096	0.78366821	0.173712431	0.696089054	0.196846548	0.276232372	0.747590004
KB3897	Cr_LTWV_1449	CROSS	Final	0	FALSE	FALSE		TRUE	XX	0.814732143	0.024107143	1.12	18695.08	2470	20	52	0.056226664	174.48054	FALSE	0.211980954	0.395772666	1.158379897	1.03973903	0.458409481	0.568438454	0.857552018	1.001440175	0.763623541	1.884720893	0.681302399	1.219946911	0.168279606	0.78571492	0.261191773	0.318212136	0.885901729
EL8988	Cr_LTWV_1458	CROSS	Final	0	FALSE	FALSE		TRUE	XX	0.861359571	0.024150268	1.118	17522.71	2810	23	167	0.059714474	219.8589986	FALSE	0.214578631	0.367979524	1.114553367	1.005437851	0.406729229	0.636374019	0.687108169	0.814999316	0.684197661	1.668462992	0.600135341	1.085220012	0.149577285	0.789261294	0.197343858	0.243055954	0.811175707
PC4268	Cr_LTWV_1459	CROSS	Final	0	FALSE	FALSE		TRUE	XX	0.867805755	0.024730216	1.112	15531.75	2808	17	167	0.051852625	173.994561	FALSE	0.202424107	0.335828289	1.078178782	0.938786864	0.390941214	0.497625929	0.643778194	0.790960608	0.757802715	1.578122545	0.60379557	0.999243682	0.127480831	0.653307065	0.193861	0.256120578	0.755678035
QF2274	Cr_LTWV_1473	CROSS	Final	0	FALSE	FALSE		TRUE	XX	0.819120287	0.027827648	1.114	14319.32	2471	15	52	0.06592796	337.646596	FALSE	0.205875762	0.379766756	1.10040176	1.049142326	0.425788508	0.564063274	0.661484132	1.067858305	0.745706035	1.5725612	0.633410164	0.992016691	0.149727827	0.651707128	0.204688555	0.260766654	0.794660889
CW2438	Cr_LTWV_1499	CROSS	Final	0	FALSE	FALSE		TRUE	XX	0.857335128	0.02153432	1.1145	16138.07	2800	12	167	0.051603338	170.9890354	FALSE	0.233980881	0.412069083	1.165566836	1.037670507	0.492561977	0.603293924	0.785409869	0.862122881	0.63155009	1.411011293	0.640658985	0.933320983	0.157205904	0.670774109	0.197483334	0.289068011	0.753373822
CG0483	Cr_LTWV_1500	CROSS	Final	0	FALSE	FALSE		TRUE	XX	0.821782178	0.02970297	1.111	13288.78	2789	17	166	0.068295629	421.8557516	FALSE	0.263079016	0.380019745	1.096187649	1.024096774	0.401993164	0.516224842	0.730014168	0.735056014	0.694119233	1.606317124	0.689453644	1.014088334	0.153889184	0.67244682	0.260971975	0.307627865	0.718801704
VK1838	Cr_LTWV_1527	CROSS	Final	0	FALSE	FALSE		TRUE	XX	0.831374322	0.027124774	1.106	13600.62	2734	19	141	0.053582253	202.4653061	FALSE	0.269031803	0.41358401	1.203106695	0.964808779	0.498286015	0.605266413	0.771361751	0.894223774	0.712320336	1.77374234	0.68379223	1.073333223	0.15249302	0.775626262	0.236092135	0.312485697	0.837388141
LN7974	Cr_LTWV_1550	CROSS	Final	0	FALSE	FALSE		TRUE	XX	0.869154676	0.020683453	1.112	15094.83	2767	14	141	0.050226224	161.1791624	FALSE	0.22358643	0.391922169	1.196170838	1.035652343	0.459958691	0.62219963	0.757345205	0.987092683	0.720378915	1.636122684	0.874338875	1.044330809	0.171316891	0.685863795	0.243063292	0.271483612	0.819088184
QG9504	Cr_LTWV_1562	CROSS	Final	0	FALSE	FALSE		TRUE	XX	0.848920863	0.024280576	1.112	15248.23	2767	21	143	0.049708983	156.0896936	FALSE	0.26652278	0.372174404	1.085962282	1.03264461	0.454938121	0.588986488	0.754776249	0.776155783	0.652534858	1.475515755	0.734708343	0.913286475	0.135884646	0.615153464	0.201466039	0.298460918	0.85793578
XL6230	Cr_LTWV_1569	CROSS	Final	0	FALSE	FALSE		TRUE	XX	0.836946703	0.028003613	1.107	13311.55	2749	26	151	0.042020646	113.1049097	FALSE	0.293279125	0.446980223	1.099345981	1.057577745	0.487246005	0.614804395	0.792244275	0.984257964	0.634186058	1.40900186	0.640646612	1.022119818	0.17909258	0.672648894	0.236260975	0.341282547	0.764448866
KB2984	Cr_LTWV_1572	CROSS	Final	0	FALSE	FALSE		TRUE	XX	0.789545455	0.029090909	1.1	13014.86	2768	32	140	0.062049198	432.6705078	FALSE	0.274609215	0.4109918	1.149071297	0.990867499	0.434119213	0.689673284	0.827669409	0.792632531	0.654098559	1.608161969	0.719639035	0.863705146	0.15574507	0.726477373	0.231197294	0.338997162	0.829820796
BN2239	Cr_LTWV_1578	CROSS	Final	0	FALSE	FALSE		TRUE	XX	0.819081908	0.0270027	1.111	14850.67	2791	16	166	0.057906875	261.6190118	FALSE	0.25588068	0.406109574	1.257384193	1.018203094	0.54792134	0.614652327	0.759830945	0.825080518	0.644751976	1.594742668	0.744680115	1.009651293	0.150228894	0.705759317	0.229753916	0.321332264	0.725825749
QK9801	Cr_LTWV_1593	CROSS	Final	0	FALSE	FALSE		TRUE	XX	0.826145553	0.028301887	1.113	15024.83	2805	16	167	0.066609928	354.2039048	FALSE	0.235277158	0.436011502	1.364274731	1.102374982	0.463898667	0.541170741	0.761406134	1.049861919	0.683867834	1.689802476	0.726730207	0.913487691	0.172181614	0.747961725	0.20120024	0.294778651	0.816248673
VN6860	Cr_LTWV_1594	CROSS	Final	0	FALSE	FALSE		TRUE	XX	0.839189189	0.032432432	1.11	13047.63	2807	22	167	0.063212168	347.0469655	FALSE	0.27437935	0.442762431	1.286593895	1.099816667	0.511663838	0.644254976	0.831721984	1.085561204	0.778072391	1.675323521	0.729021334	0.969908009	0.157040024	0.728868049	0.222645813	0.374550805	0.744426431
BR1630	Cr_LTWV_1600	CROSS	Final	0	FALSE	FALSE		TRUE	XX	0.860611511	0.028776978	1.112	16173.79	2716	21	142	0.049462991	167.1241399	FALSE	0.283977891	0.466124389	1.304764953	1.154150944	0.50068647	0.616429255	0.78274768	1.004711675	0.669292547	1.532169847	0.730997301	0.868070887	0.146038706	0.67306408	0.230619972	0.313099072	0.804449453
II4071	Cr_LTWV_1608	CROSS	Final	0	FALSE	FALSE		TRUE	XX	0.822573363	0.027088036	1.1075	15303.85	2480	30	135	0.056725236	205.2474159	FALSE	0.223995955	0.401010262	1.191857125	0.989032316	0.480990148	0.659507345	0.722563382	0.887619912	0.722236667	1.491258954	0.65833117	0.885594277	0.152510665	0.724131615	0.228896684	0.269474714	0.673882814
HK8308	Cr_LTWV_1656	CROSS	Final	0	FALSE	FALSE		TRUE	XX	0.839963834	0.03164557	1.106	13454.7	2488	30	167	0.049806721	159.2965302	FALSE	0.250990395	0.427434339	1.201810687	0.993630617	0.487041771	0.674262619	0.874044136	0.859922674	0.761295415	1.503638343	0.712539212	0.925253014	0.136457911	0.632938764	0.2703145	0.36254994	0.751707686
IC9616	Cr_LTWV_1716	CROSS	Final	0	FALSE	FALSE		TRUE	XX	0.863883848	0.031760436	1.102	14540.63	2716	23	149	0.038997364	112.7896116	FALSE	0.221861092	0.392280121	1.08234652	1.031592184	0.422952796	0.531201202	0.671222648	0.816883464	0.564487243	1.335086605	0.627139275	0.802991356	0.126404429	0.650040622	0.192495102	0.319999896	0.705540281
GR4397	Cr_LTWV_1725	CROSS	Final	0	FALSE	FALSE		TRUE	XX	0.823893805	0.02920354	1.13	15333.57	2732	65	142	0.089531078	726.5373701	FALSE	0.228061669	0.440993139	1.357739745	1.217328886	0.550687084	0.524013586	0.698663043	1.219154944	0.703293405	1.503107048	0.939833203	0.886094909	0.149410719	0.646424725	0.197409972	0.274626162	0.931094209
RA5662	Cr_LTWV_1732	CROSS	Final	0	FALSE	FALSE		TRUE	XX	0.822202166	0.028880866	1.108	16041.9	2781	16	149	0.054361959	222.2551445	FALSE	0.298343739	0.438476778	1.139952351	0.971892443	0.452128529	0.627045481	0.74081007	0.860995345	0.763251304	1.494523849	0.676104512	0.841546276	0.145930358	0.733204985	0.258697559	0.272037626	0.863364142
UQ4004	Cr_LTWV_1742	CROSS	Final	0	FALSE	FALSE		TRUE	XX	0.821428571	0.028481013	1.106	13871.75	2741	16	151	0.05180101	207.5370102	FALSE	0.324472304	0.473552225	1.2080664	0.945951027	0.502531977	0.616288319	0.74777854	0.783606741	0.718438343	1.617819916	0.701425353	0.884459164	0.167174244	0.71995221	0.280137608	0.344945562	0.868743775
PE9831	Cr_LTWV_1750	CROSS	Final	0	FALSE	FALSE		TRUE	XX	0.821670429	0.032957111	1.1075	14144.03	2560	21	154	0.064874808	365.7115235	FALSE	0.277714382	0.414167732	1.090142071	0.945558082	0.429651298	0.607818366	0.757351441	0.943437045	0.615949006	1.452697914	0.714011595	0.838516439	0.152856032	0.630301353	0.204609323	0.291925327	0.762371227
PG7347	Cr_LTWV_1809	CROSS	Final	0	FALSE	FALSE		TRUE	XX	0.844827586	0.027676951	1.102	16538.81	2757	18	141	0.041972326	114.5784328	FALSE	0.231878879	0.423065584	1.106851306	1.011016098	0.511766058	0.603368796	0.688985613	0.873944541	0.56860208	1.302149553	0.713654865	0.779197683	0.130118213	0.632754229	0.192275055	0.234055578	0.731249847
PQ9198	Cr_LTWV_1822	CROSS	Final	0	FALSE	FALSE		TRUE	XX	0.824275362	0.031702899	1.104	15092.6	2747	22	129	0.058844718	293.6278186	FALSE	0.193869894	0.427361864	1.111737165	1.053562945	0.435180267	0.578098025	0.669467329	0.880034151	0.636537275	1.436929727	0.707697995	0.767594913	0.17167358	0.728701671	0.219909151	0.266488282	0.752885714
FH4892	Cr_LTWV_1833	CROSS	Final	0	FALSE	FALSE		TRUE	XX	0.781588448	0.029783394	1.108	12832.13	2549	21	155	0.067630134	457.5565766	FALSE	0.247815418	0.413181556	1.265962727	1.04674739	0.433443194	0.598653473	0.770565678	0.889252119	0.659516316	1.496633683	0.63278654	0.829324429	0.172691499	0.734016801	0.227086204	0.342811329	0.734562306
QK7994	Cr_LTWV_1884	CROSS	Final	0	FALSE	FALSE		TRUE	XX	0.845281307	0.02722323	1.102	13171.19	2740	18	143	0.053212168	227.5644114	FALSE	0.27841074	0.367848387	1.066342745	0.88010289	0.402773105	0.5581881	0.789754164	0.816251395	0.635326172	1.470026929	0.705099684	0.798713113	0.169916345	0.712919784	0.229667982	0.284636451	0.841533854
UX4360	Cr_LTWV_1907	CROSS	Final	0	FALSE	FALSE		TRUE	XX	0.859530262	0.027100271	1.107	15167.3	2571	17	154	0.055152647	206.4447016	FALSE	0.206167218	0.432245693	1.134743842	0.963256495	0.423147172	0.513341209	0.689905268	0.851766643	0.61777641	1.321131666	0.662016322	0.926071234	0.116368769	0.720299603	0.187904244	0.286801215	0.689114092
NN2381	Cr_LTWV_1925	CROSS	Final	0	FALSE	FALSE		TRUE	XX	0.833258021	0.026660642	1.1065	15054.08	2774	19	143	0.06202394	354.4719506	FALSE	0.227446672	0.359038921	1.112655305	1.019790104	0.545965012	0.600169593	0.642882271	0.976081018	0.604022369	1.372252734	0.535934507	0.788291373	0.128337316	0.567354565	0.166067956	0.24896908	0.703065298
HG8363	Cr_LTWV_1973	CROSS	Final	0	FALSE	FALSE		TRUE	XX	0.826714801	0.027075812	1.108	15324.12	2482	40	134	0.052902482	190.3544695	FALSE	0.253978762	0.388603167	1.14303494	1.07895294	0.481985389	0.53967224	0.642125132	0.928666946	0.633054462	1.6000923	0.646236299	0.855383763	0.142977252	0.746405209	0.217826595	0.305857774	0.719193199
KI7058	Cr_LTWV_2029	CROSS	Final	0	FALSE	FALSE		TRUE	XX	0.845631507	0.025350837	1.1045	15724.78	2453	33	165	0.060812651	317.4448475	FALSE	0.189764147	0.396189892	1.018201664	1.050570951	0.460356121	0.470403954	0.610183309	1.078425071	0.622393335	1.405869976	0.607194397	0.764525664	0.140288106	0.624237558	0.183531947	0.262833519	0.657560752
UM2988	Cr_LTWV_2034	CROSS	Final	0	FALSE	FALSE		TRUE	XX	0.853503185	0.029117379	1.099	13494.44	2443	24	135	0.043529541	139.7888825	FALSE	0.235874842	0.3941622	1.069625343	0.999967048	0.509024281	0.60113626	0.77128035	0.700065859	0.590687516	1.432218996	0.677241652	0.744009868	0.167179907	0.730374628	0.20097159	0.284413334	0.723557007
ZU8162	Cr_LTWV_2049	CROSS	Final	0	FALSE	FALSE		TRUE	XX	0.864791289	0.02676951	1.102	14358.03	2554	17	154	0.046210191	145.2617726	FALSE	0.198077347	0.401865785	1.110389291	0.904023898	0.465871791	0.612758263	0.70650373	0.722104759	0.603704094	1.409107203	0.681291354	0.862583665	0.14911519	0.596530407	0.242442773	0.360425552	0.719945688
SL4840	Cr_LTWV_2075	CROSS	Final	0	FALSE	FALSE		TRUE	XX	0.880845324	0.027877698	1.112	16097.06	2815	19	167	0.053745882	189.9143052	FALSE	0.261476328	0.384790776	1.089950625	0.964151251	0.459773415	0.55519457	0.65328702	0.737588131	0.61974052	1.381991541	0.649621754	0.843135359	0.160712583	0.667202605	0.220164435	0.26545221	0.761691913
IE2345	Cr_LTWV_2076	CROSS	Final	0	FALSE	FALSE		TRUE	XX	0.886630533	0.023486902	1.107	16876.53	2816	14	167	0.046021305	155.5887043	FALSE	0.185286895	0.399726701	1.207120125	1.237872891	0.478534367	0.501347112	0.653629594	1.00109437	0.630698341	1.41101274	0.710454069	0.86516596	0.132136161	0.662399169	0.160222502	0.251769753	0.744051021
CK6460	Cr_LTWV_2097	CROSS	Final	0	FALSE	FALSE		TRUE	XX	0.863224638	0.029891304	1.104	13585.75	2789	18	167	0.055018669	210.2160555	FALSE	0.249452499	0.419189136	1.095265029	0.981690167	0.425077657	0.57015611	0.619693298	0.893141523	0.564709227	1.407871922	0.639051813	0.749535201	0.130283542	0.58517184	0.192922691	0.266750031	0.726643573
JZ3328	Cr_LTWV_2098	CROSS	Final	0	FALSE	FALSE		TRUE	XX	0.875793291	0.026291931	1.103	14343.46	2792	17	167	0.045769822	134.3824579	FALSE	0.252867777	0.404853373	1.103708239	0.979052163	0.446475116	0.558512204	0.75337447	0.720118906	0.594905085	1.316836663	0.642801463	0.741243509	0.127932829	0.578172726	0.229442475	0.287238832	0.703456265
SK5811	Cr_LTWV_2116	CROSS	Final	0	FALSE	FALSE		TRUE	XX	0.852385239	0.02880288	1.111	15401.58	2816	12	167	0.049970349	171.3933903	FALSE	0.223158991	0.359638536	1.053268881	0.89601224	0.438072071	0.54104855	0.667334334	0.894259173	0.496118082	1.416153838	0.63454548	0.828876251	0.137193758	0.610327178	0.195304697	0.242312875	0.663049058
ZW8295	Cr_LTWV_2131	CROSS	Final	0	FALSE	FALSE		TRUE	XX	0.877145438	0.024390244	1.107	15676.99	2814	14	181	0.06075884	253.2967464	FALSE	0.19538192	0.358933745	1.102252554	1.05843036	0.420233786	0.517063611	0.650507612	0.795369623	0.614276163	1.301780678	0.65427109	0.727180504	0.160426225	0.646361408	0.196019797	0.304076269	0.634369308
LJ8036	Cr_LTWV_2137	CROSS	Final	0	FALSE	FALSE		TRUE	XX	0.830948122	0.029516995	1.118	14275.93	2513	20	71	0.056580277	217.3613416	FALSE	0.225974724	0.420778105	1.126931605	0.962599087	0.396471462	0.547424819	0.709095515	0.739076042	0.647523356	1.273752133	0.725486738	0.750353764	0.166433957	0.612989711	0.176100575	0.322220623	0.80134868
MF4065	Cr_LTWV_2138	CROSS	Final	0	FALSE	FALSE		TRUE	XX	0.827276806	0.031404217	1.1145	13639.09	2534	29	70	0.059102789	245.8409451	FALSE	0.222595514	0.37231226	1.065540384	0.940532034	0.462054325	0.495927555	0.737879201	0.801593134	0.562940829	1.351189964	0.615070411	0.731867069	0.128527647	0.599233576	0.209911382	0.253169404	0.706865399
RG7518	Cr_LTWV_2141	CROSS	Final	0	FALSE	FALSE		TRUE	XX	0.871841155	0.024368231	1.108	15750.32	2803	15	166	0.043476828	134.4401442	FALSE	0.167298237	0.407864848	1.085438579	0.885506076	0.404372854	0.553385743	0.639923692	0.804491825	0.599416567	1.355782372	0.615289265	0.7736353	0.126537148	0.649002875	0.165647476	0.235233384	0.698462202
LI6749	Cr_LTWV_2147	CROSS	Final	0	FALSE	FALSE		TRUE	XX	0.818548387	0.024641577	1.116	16486.68	2522	16	70	0.058817263	236.653035	FALSE	0.20101081	0.38121694	1.032591438	1.010391693	0.437808094	0.493550078	0.601758673	0.821147961	0.543287213	1.268357587	0.657076072	0.686372457	0.118701918	0.631358334	0.202041945	0.270036248	0.703598489
FX4708	Cr_LTWV_2165	CROSS	Final	0	FALSE	FALSE		TRUE	XX	0.851333032	0.028468143	1.1065	13834.38	2787	14	166	0.04601801	141.03036	FALSE	0.257763693	0.37182738	1.056932339	0.929351599	0.413607362	0.533309178	0.715247264	0.790783736	0.572776081	1.319249906	0.698838863	0.787530969	0.119701816	0.634578649	0.222489245	0.277063442	0.660311648
KY0584	Cr_LTWV_2180	CROSS	Final	0	FALSE	FALSE		TRUE	XX	0.805454545	0.027727273	1.1	12792.33	2750	24	140	0.052714694	256.5235076	FALSE	0.181671382	0.397269348	1.04930076	0.892800714	0.384761852	0.546733928	0.63209759	0.760221254	0.564478938	1.241447171	0.643197993	0.75076246	0.129139898	0.5865234	0.195429628	0.255700126	0.632019418
YZ4114	Cr_LTWV_2212	CROSS	Final	0	FALSE	FALSE		TRUE	XX	0.840381992	0.021373352	1.0995	14940.39	2761	22	142	0.038151768	90.31896549	FALSE	0.171682261	0.365184569	0.981701259	0.872467165	0.461902256	0.51973207	0.657680273	0.842146672	0.55855301	1.376135398	0.669393488	0.689406352	0.108497835	0.599248065	0.143972142	0.25180065	0.622942225
MJ8145	Cr_LTWV_2233	CROSS	Final	0	FALSE	FALSE		TRUE	XX	0.855660803	0.01939558	1.1085	15315.69	2547	17	154	0.04892159	152.5794076	FALSE	0.209458463	0.374126244	1.19380877	0.95588276	0.436807081	0.525735518	0.676757159	0.814067367	0.579863032	1.391318698	0.662849849	0.781355806	0.151935737	0.713582151	0.17929331	0.288593019	0.670489076
HW3790	Cr_LTWV_2250	CROSS	Final	0	FALSE	FALSE		TRUE	XX	0.862647325	0.029918404	1.103	13456.78	2533	23	154	0.046922908	160.9497414	FALSE	0.226800152	0.423503954	1.113936528	1.057310802	0.462889302	0.551840738	0.671928892	0.926075852	0.644284837	1.422554167	0.675718803	0.764595927	0.152339552	0.570938916	0.230367127	0.264996508	0.794097781
WQ7351	Cr_LTWV_2272	CROSS	Final	0	FALSE	FALSE		TRUE	XX	0.848868778	0.028054299	1.105	12964.31	2735	23	141	0.043561388	145.9567698	FALSE	0.198082293	0.390302338	1.087292838	1.005221359	0.444065328	0.540946699	0.697993253	0.764329224	0.593166993	1.246036359	0.589001711	0.705321064	0.144010764	0.604351546	0.210732409	0.347723901	0.656648974
ML5331	Cr_LTWV_2316	CROSS	Final	0	FALSE	FALSE		TRUE	XX	0.862567812	0.025316456	1.106	14525.12	2566	20	154	0.044437733	146.730194	FALSE	0.152494476	0.400960645	1.102091004	0.991868135	0.415142976	0.459617663	0.615485606	0.796826667	0.495899644	1.280609369	0.560752826	0.726328092	0.132047136	0.540718563	0.184026065	0.255144257	0.6736607
KI9180	Cr_LTWV_2321	CROSS	Final	0	FALSE	FALSE		TRUE	XX	0.860254083	0.029945554	1.102	14300	2544	21	154	0.050379969	140.0459747	FALSE	0.181468575	0.373146942	1.001888351	0.970909323	0.403216879	0.469091021	0.645384769	0.852937267	0.562377757	1.229091203	0.571468668	0.798461729	0.138391641	0.575594543	0.200979069	0.238181875	0.679230931
ND5645	Cr_LTWV_2325	CROSS	Final	0	FALSE	FALSE		TRUE	XX	0.856108597	0.027149321	1.105	12738.72	2530	21	154	0.059321327	270.5011489	FALSE	0.236209009	0.396036706	1.170290428	0.989974014	0.449731276	0.55649241	0.634365237	0.858877621	0.553587879	1.430442191	0.754393012	0.699442428	0.122775304	0.61772306	0.171210318	0.29759666	0.683271256
XP2118	Cr_LTWV_2342	CROSS	Final	0	FALSE	FALSE		TRUE	XX	0.846188748	0.034029038	1.102	12615.75	2780	21	143	0.047589501	180.6791712	FALSE	0.1839764	0.374056282	1.051384304	0.91948567	0.419713502	0.470523012	0.692467829	0.832451595	0.556447362	1.259299038	0.66306014	0.722985241	0.135624136	0.63824988	0.174147415	0.278620011	0.657590786
YR0171	Cr_LTWV_2422	CROSS	Final	0	FALSE	FALSE		TRUE	XX	0.83800905	0.027149321	1.105	14337.99	2470	6	58	0.052358884	193.7688543	FALSE	0.187892396	0.368182612	1.006486697	0.872855728	0.40138112	0.496791958	0.58202006	0.753243457	0.597712632	1.313433406	0.556493476	0.721649079	0.092411813	0.581392357	0.155949294	0.280583188	0.657414151
LI4488	Cr_LTWV_2427	CROSS	Final	0	FALSE	FALSE		TRUE	XX	0.816920322	0.025962399	1.117	14484.34	2508	19	69	0.068258291	348.3045134	FALSE	0.203737225	0.398361162	1.017374364	1.014336601	0.456561935	0.541481212	0.662094201	0.686741504	0.543621454	1.291256292	0.5950563	0.711734006	0.133385401	0.580143647	0.202977784	0.240052298	0.679561337
KQ4875	Cr_LTWV_2485	CROSS	Final	0	FALSE	FALSE		TRUE	XX	0.822182308	0.02649304	1.1135	13528.4	2504	19	69	0.065673183	345.9327235	FALSE	0.194036227	0.401451714	1.084163558	0.914298701	0.427766722	0.522456401	0.685372913	0.873569573	0.620546333	1.355962113	0.671697979	0.639543404	0.156042086	0.658096963	0.20364564	0.245853139	0.720040719
HV0096	Cr_LTWV_2492	CROSS	Final	0	FALSE	FALSE		TRUE	XX	0.816636852	0.030411449	1.118	13151.61	2491	21	68	0.066362838	359.137664	FALSE	0.222710395	0.372197809	1.014628715	0.923993416	0.390522563	0.449146569	0.658474571	0.821040233	0.551871644	1.308052892	0.685239357	0.787508214	0.145533525	0.562972947	0.192447938	0.278292948	0.775190329
TL0210	Cr_LTWV_2504	CROSS	Final	0	FALSE	FALSE		TRUE	XX	0.837262013	0.026291931	1.103	15140.51	2460	12	50	0.043930376	129.0283007	FALSE	0.170932201	0.337439186	1.048313714	0.9172745	0.404940233	0.48459411	0.588619696	0.773091735	0.506257851	1.278821203	0.57369285	0.756711834	0.136257006	0.589940656	0.155807211	0.233941984	0.702486433
EZ5429	Cr_LTWV_2543	CROSS	Final	0	FALSE	FALSE		TRUE	XX	0.858371041	0.028054299	1.105	15298.25	2568	18	154	0.045396442	122.153805	FALSE	0.224862296	0.385534251	0.985929656	0.960828749	0.533198184	0.552808268	0.666023819	0.862255393	0.585753209	1.395780412	0.663409142	0.841011136	0.143480448	0.615168335	0.159037781	0.279051495	0.787018038
IA8048	Cr_LTWV_2609	CROSS	Final	0	FALSE	FALSE		TRUE	XX	0.767579909	0.031050228	1.095	12027.53	2570	31	154	0.108615199	1912.582414	FALSE	0.218332424	0.408396369	1.111948908	1.021739206	0.466097322	0.539512223	0.622488521	0.850382341	0.606109432	1.447595517	0.736477002	0.830926977	0.120972459	0.596215464	0.175597136	0.240614636	0.70197283
LT4870	Cr_LTWV_2620	CROSS	Final	0	FALSE	FALSE		TRUE	XX	0.719171917	0.02340234	1.111	13101.07	2541	36	154	0.105485394	2043.341374	FALSE	0.231660469	0.419965701	1.054265042	0.995109568	0.45881749	0.449199954	0.611400448	0.751083696	0.561404531	1.473162128	0.563083783	0.826573714	0.133424218	0.647046392	0.209448543	0.238453808	0.644374854
VS3404	Cr_LTWV_2637	CROSS	Final	0	FALSE	FALSE		TRUE	XX	0.856561086	0.028959276	1.105	13168.07	2645	19	109	0.051882275	203.9276966	FALSE	0.217951386	0.412057219	1.033104757	1.120361252	0.449496255	0.511464315	0.712632684	0.876134194	0.641399792	1.36215819	0.640108791	0.812723251	0.126745945	0.599024575	0.194105833	0.29055122	0.801559887
FH6078	Cr_LTWV_2643	CROSS	Final	0	FALSE	FALSE		TRUE	XX	0.875565611	0.028054299	1.105	11967.11	2604	24	110	0.051371623	186.8680387	FALSE	0.225367745	0.356560685	1.145890949	0.967485263	0.483241257	0.50404829	0.617860255	1.024474808	0.587359985	1.276498953	0.644265968	0.746546324	0.113059903	0.527696444	0.178656373	0.302245137	0.682871789
ST3686	Cr_LTWV_2650	CROSS	Final	0	FALSE	FALSE		TRUE	XX	0.838301716	0.027100271	1.107	13173.61	2688	24	110	0.074353174	572.8800531	FALSE	0.184991108	0.342958485	1.047321428	0.953801098	0.439287461	0.532124608	0.603631224	1.287346822	0.4785326	1.359081166	0.71309252	0.703755669	0.125326352	0.618889005	0.166545134	0.233952645	0.631110412
MY5437	Cr_LTWV_2665	CROSS	Final	0	FALSE	FALSE		TRUE	XX	0.852674524	0.024478694	1.103	14250.99	2554	27	154	0.069453108	522.5324513	FALSE	0.265034225	0.424882773	1.039576925	0.959933333	0.487474917	0.517788601	0.656936832	0.844923777	0.60704556	1.396183737	0.625710931	0.986738489	0.138937719	0.677566978	0.201319352	0.307136564	0.758122787
ZU7281	Cr_LTWV_268	CROSS	Final	0	FALSE	FALSE		TRUE	XX	0.84397482	0.030125899	1.112	17183.34	2478	12	52	0.047282012	138.1954538	FALSE	0.262172575	0.449970777	1.215945345	1.083025886	0.527254945	0.675538124	0.768593384	1.024248017	0.70946634	1.782424334	0.713132682	1.086750425	0.200077539	0.740775739	0.249660454	0.336081381	0.845761161
BX2214	Cr_LTWV_2725	CROSS	Final	0	FALSE	FALSE		TRUE	XX	0.860528715	0.025524157	1.097	13706.52	2511	22	97	0.042824511	126.1092594	FALSE	0.204939012	0.364717024	0.960783853	0.959178778	0.441541794	0.570166741	0.616859859	0.714623574	0.541348333	1.282090869	0.661947901	0.738772671	0.144456833	0.574544221	0.174880317	0.205668592	0.715061322
AN2573	Cr_LTWV_2733	CROSS	Final	0	FALSE	FALSE		TRUE	XX	0.826263538	0.032490975	1.108	15172.96	2511	21	96	0.055829124	217.4379938	FALSE	0.30046877	0.383906686	1.325713819	1.097874263	0.510579416	0.555527804	0.792989743	0.922035115	0.786267257	1.813357695	0.657880952	1.142756744	0.213076449	0.75417068	0.253279553	0.346867106	0.961513244
XB5519	Cr_LTWV_274	CROSS	Final	0	FALSE	FALSE		TRUE	XX	0.794779478	0.02880288	1.111	16347.3	2474	8	52	0.059815506	289.4650229	FALSE	0.226092372	0.374985454	1.167593371	1.112110205	0.487970468	0.522777437	0.733821453	0.91372883	0.669040116	1.48825793	0.652462456	0.867788524	0.157090154	0.657172713	0.205660864	0.260104103	0.80673869
RD3579	Cr_LTWV_2775	CROSS	Final	0	FALSE	FALSE		TRUE	XX	0.82816773	0.039197812	1.097	11452.26	2806	26	166	0.069582693	566.4820801	FALSE	0.293915763	0.455630556	1.275905267	0.966795998	0.455979832	0.560849954	0.803946058	0.781505074	0.728939034	1.626141787	0.595864874	0.867077697	0.138487938	0.684493662	0.232181228	0.318277765	0.764041274
KL1564	Cr_LTWV_2782	CROSS	Final	0	FALSE	FALSE		TRUE	XX	0.865245009	0.029491833	1.102	11410.13	2783	21	166	0.051692291	215.645483	FALSE	0.199647204	0.396139316	1.073257094	0.947929833	0.43829485	0.592017938	0.712963128	1.004984411	0.663708637	1.323999259	0.69306852	0.764671578	0.135756593	0.609721509	0.201049467	0.322520505	0.733646508
ZS1615	Cr_LTWV_280	CROSS	Final	0	FALSE	FALSE		TRUE	XX	0.812331233	0.02790279	1.111	15853.72	2472	12	50	0.05967494	257.6040349	FALSE	0.291855808	0.414855338	1.223561478	1.178713957	0.475282799	0.596894642	0.698195793	0.975733194	0.648806751	1.516489589	0.650068285	0.851913668	0.139525621	0.676371261	0.218686857	0.281826615	0.756983261
HI6830	Cr_LTWV_2831	CROSS	Final	0	FALSE	FALSE		TRUE	XX	0.744131455	0.050704225	1.065	8077.91	2577	121	151	0.15556007	5471.241076	FALSE	0.307752993	0.527859519	1.496674855	1.512396749	0.651282582	0.672203843	0.938238108	1.5692184	0.89540523	1.94926735	0.918307202	1.053243148	0.177892619	0.797483823	0.265786676	0.378068239	0.911127124
CX4853	Cr_LTWV_2841	CROSS	Final	0	FALSE	FALSE		TRUE	XX	0.835159817	0.03652968	1.095	10848.78	2583	27	154	0.079829783	663.3349952	FALSE	0.21329581	0.457194131	1.172205194	1.115608985	0.443920753	0.640717017	0.759532185	0.975040225	0.642560541	1.345312165	0.659060088	0.881020464	0.128124968	0.681182384	0.204999949	0.314413141	0.834471465
IF7706	Cr_LTWV_289	CROSS	Final	0	FALSE	FALSE		TRUE	XX	0.851217313	0.026149684	1.109	16001.18	2581	21	110	0.045280035	138.119145	FALSE	0.258980961	0.48683921	1.209973549	1.143665923	0.491963833	0.683512252	0.811377852	0.984552621	0.663888694	1.490702911	0.782442479	0.830813923	0.159550771	0.785442258	0.210921994	0.365035664	0.817627392
TT6548	Cr_LTWV_2927	CROSS	Final	0	FALSE	FALSE		TRUE	XX	0.720468891	0.027953111	1.109	12292.21	2460	20	50	0.088476828	1401.067507	FALSE	0.240152004	0.395860316	1.091666581	1.073362313	0.454271271	0.556612471	0.647401643	0.925951936	0.553683788	1.291467842	0.683440715	0.740305976	0.140170022	0.610386345	0.192316849	0.288393921	0.724849038
PK9598	Cr_LTWV_296	CROSS	Final	0	FALSE	FALSE		TRUE	XX	0.856693621	0.022911051	1.113	17178.44	2598	23	110	0.04977707	177.6725166	FALSE	0.252584104	0.474781275	1.227585523	1.005446565	0.509184872	0.696570958	0.749951835	0.87411913	0.687024106	1.55683551	0.793145521	0.993396574	0.159036592	0.753852073	0.308060631	0.355038131	0.774866792
ZR3688	Cr_LTWV_2986	CROSS	Final	0	FALSE	FALSE		TRUE	XX	0.850045579	0.025524157	1.097	12533.51	2478	30	96	0.041104766	139.6459725	FALSE	0.166433889	0.40435616	1.028523137	0.943471111	0.445844953	0.642517789	0.666852562	0.927513883	0.58874193	1.356284602	0.624805266	0.904854619	0.131008843	0.63070944	0.170263624	0.292655563	0.744803621
LI5318	Cr_LTWV_3012	CROSS	Final	0	FALSE	FALSE		TRUE	XX	0.83120438	0.032846715	1.096	10188.7	2500	31	95	0.071330991	663.2775767	FALSE	0.248019962	0.432538177	1.199859135	1.122714818	0.527741724	0.680067399	0.736404343	1.048809384	0.616860095	1.494499391	0.656315586	0.81256718	0.129457194	0.604591597	0.226329257	0.365208658	0.774191318
DH7243	Cr_LTWV_3013	CROSS	Final	0	FALSE	FALSE		TRUE	XX	0.823287671	0.035159817	1.095	10396.85	2536	24	96	0.067859653	538.9885791	FALSE	0.228338372	0.42224324	1.0070357	1.107546904	0.458600403	0.566517696	0.715120385	1.105046147	0.639616753	1.41889118	0.608645837	0.792259127	0.1236913	0.573250504	0.217854428	0.301533612	0.776196571
SL7122	Cr_LTWV_3081	CROSS	Final	0	FALSE	FALSE		TRUE	XX	0.830291971	0.028284672	1.096	12444.92	2768	20	151	0.057274325	301.1083824	FALSE	0.220813048	0.444197427	1.104949135	1.129617842	0.450866817	0.570755124	0.606030571	0.899001594	0.628690425	1.340949107	0.650948509	0.736123847	0.126075572	0.579353012	0.188671411	0.231580497	0.764167426
KJ5273	Cr_LTWV_3092	CROSS	Final	0	FALSE	FALSE		TRUE	XX	0.832343536	0.022384651	1.0945	11936.76	2512	16	96	0.056688996	329.4125645	FALSE	0.229040303	0.381510439	1.067123402	1.152741247	0.419209099	0.531886205	0.683267268	0.932664848	0.55291368	1.34860673	0.530880907	0.712588448	0.143673782	0.542022956	0.212536667	0.239093279	0.731270229
VF2370	Cr_LTWV_3098	CROSS	Final	0	FALSE	FALSE		TRUE	XX	0.815327793	0.031394275	1.083	10088.89	2521	31	97	0.065953218	660.2848325	FALSE	0.180297413	0.352467071	0.932015711	0.799394524	0.414515549	0.538116909	0.729813005	0.744086137	0.495198393	1.147797717	0.474185171	0.733282169	0.12657493	0.563094891	0.20864544	0.303006703	0.741905519
SM2474	Cr_LTWV_3122	CROSS	Final	0	FALSE	FALSE		TRUE	XX	0.802389706	0.031709559	1.088	10751.75	2486	37	96	0.074679332	887.5174676	FALSE	0.235961622	0.361057555	0.845629904	0.787964864	0.385053652	0.480852024	0.697188931	2.433650688	0.590043567	1.318855261	0.515916088	0.672169744	0.141093331	0.530797389	0.249540809	0.264050077	0.644453322
VZ9179	Cr_LTWV_3123	CROSS	Final	0	FALSE	FALSE		TRUE	XX	0.82739726	0.032876712	1.095	12895.01	2493	34	96	0.07821107	787.8994688	FALSE	0.22264434	0.38945311	1.020239966	0.94548234	0.426987021	0.472586071	0.648080374	0.880495939	0.607754683	1.280805966	0.576734922	0.802868985	0.1497479	0.601550731	0.215044499	0.259945604	0.703760846
DB3842	Cr_B2930_035_F	CROSS	Final	0	FALSE	FALSE		TRUE	XO	0.563782337	0.036574487	1.121	14724.93	2538	13	0	0.076818581	440.1162229	FALSE	0.23911825	0.389000096	1.131821856	0.998782194	0.446521583	0.5951131	0.722312328	0.82485949	0.724485513	1.430634779	0.603737928	0.914095895	0.179423578	0.694672133	0.216231897	0.250731207	0.737524623
FW9166	Cr_LTWV_3131	CROSS	Final	0	FALSE	FALSE		TRUE	XX	0.790960452	0.032015066	1.062	10552.42	2508	48	97	0.079698001	1914.643413	FALSE	0.238997339	0.319358062	0.729216701	0.726184221	0.336415762	0.447006521	0.636252233	0.587069196	0.497326738	1.019576672	0.327413087	0.69244788	0.100071844	0.442552566	0.202228517	0.315093636	0.605643137
TD7334	Cr_LTWV_3138	CROSS	Final	0	FALSE	FALSE		TRUE	XX	0.764150943	0.030188679	1.06	10939.06	2458	66	97	0.095521634	2919.050181	FALSE	0.205867743	0.314103715	0.7193487	0.683970895	0.344453666	0.461922605	0.72117701	0.514486527	0.44327384	1.068373142	0.391166995	0.646307702	0.100374237	0.425722061	0.167016149	0.3034081	0.581494101
IC6373	Cr_LTWV_3152	CROSS	Final	0	FALSE	FALSE		TRUE	XX	0.81741573	0.028089888	1.068	14180.37	2728	45	138	0.074157698	1777.053355	FALSE	0.192167073	0.267905582	0.721067275	0.599772829	0.244281373	0.39307863	0.54984465	0.458380175	0.345336572	0.963233048	0.298017634	0.584893103	0.113960363	0.387013908	0.185185591	0.256904458	0.540747566
FG1616	Cr_LTWV_335	CROSS	Final	0	FALSE	FALSE		TRUE	XX	0.788203753	0.031277927	1.119	16771.01	2488	23	70	0.078871074	472.6913023	FALSE	0.221513255	0.433188102	1.190864799	1.116629536	0.47063368	0.556973167	0.707590255	0.901257833	0.657563439	1.581240917	0.708663536	0.888557342	0.1571164	0.700494675	0.232961585	0.28608899	0.867628364
IE9995	Cr_LTWV_346	CROSS	Final	0	FALSE	FALSE		TRUE	XX	0.800892857	0.028571429	1.12	15693.47	2507	27	69	0.064220294	296.4524938	FALSE	0.235511939	0.416415185	1.269508758	1.09089946	0.501673566	0.690095862	0.752733371	0.934656149	0.660401986	1.524837855	0.709530694	0.893492537	0.155669824	0.765222641	0.232007298	0.29649271	0.809508571
IS7127	Cr_LTWV_372	CROSS	Final	0	FALSE	FALSE		TRUE	XX	0.840929401	0.025915996	1.119	16683.61	2675	29	109	0.065389853	291.1544786	FALSE	0.238617379	0.4542781	1.159101451	1.101859653	0.495096596	0.656332655	0.82098524	1.013809181	0.702006215	1.660012135	0.682526022	0.908616139	0.160277034	0.778068876	0.199597054	0.287347831	0.785081746
GD5456	Cr_LTWV_379	CROSS	Final	0	FALSE	FALSE		TRUE	XX	0.861462094	0.025722022	1.108	16966.63	2560	24	153	0.050476609	173.365053	FALSE	0.201336392	0.347800366	1.096033826	1.017762535	0.453006882	0.600413884	0.706740245	0.848194385	0.555266438	1.437468755	0.647742081	0.857860418	0.169627089	0.686465152	0.2144209	0.215776502	0.689412113
BN5210	Cr_LTWV_386	CROSS	Final	0	FALSE	FALSE		TRUE	XX	0.825560538	0.02690583	1.115	15034.09	2477	8	55	0.06268065	326.89971	FALSE	0.200344651	0.471927391	1.287008188	1.074491202	0.493012801	0.589061167	0.804371803	1.153445087	0.678990107	1.545553892	0.743909224	0.952568311	0.160102781	0.692692298	0.243047595	0.301315163	0.778364247
JU4695	Cr_LTWV_396	CROSS	Final	0	FALSE	FALSE		TRUE	XX	0.847786811	0.025293586	1.107	15659.66	2678	20	110	0.04693389	175.2079347	FALSE	0.225100709	0.419166257	1.221929665	1.138019784	0.437046597	0.555376133	0.770195646	0.815854372	0.656463912	1.467528907	0.755188932	0.780668417	0.176376783	0.751038139	0.205113043	0.266097775	0.729454014
TB3581	Cr_LTWV_402	CROSS	Final	0	FALSE	FALSE		TRUE	XX	0.838883888	0.02430243	1.111	16902.45	2471	13	55	0.046425434	146.828624	FALSE	0.252685229	0.401953511	1.13474659	1.04049991	0.455614363	0.58121744	0.702205802	0.982815973	0.65327799	1.480672728	0.783318293	0.847628488	0.195415432	0.651325611	0.210797815	0.257299944	0.775627101
ZP6783	Cr_LTWV_409	CROSS	Final	0	FALSE	FALSE		TRUE	XX	0.828111012	0.022829006	1.117	18159.63	2477	7	55	0.071382605	325.7948219	FALSE	0.20694255	0.383267735	1.198868082	1.07111217	0.54147581	0.569835419	0.730025913	1.011474389	0.671434409	1.608568074	0.637182609	0.95475517	0.158813814	0.653537568	0.22368298	0.261183745	0.79054477
VU1754	Cr_LTWV_415	CROSS	Final	0	FALSE	FALSE		TRUE	XX	0.843297101	0.02807971	1.104	15680.78	2427	30	135	0.053651439	270.7602907	FALSE	0.224669912	0.416560847	1.302804892	1.073033193	0.498316972	0.662849579	0.726749452	0.943830457	0.645949912	1.546223868	0.746008695	0.813352273	0.152670954	0.715142888	0.221226206	0.301005389	0.748814677
EW1924	Cr_LTWV_431	CROSS	Final	0	FALSE	FALSE		TRUE	XX	0.799821269	0.027703307	1.119	17002.43	2513	27	69	0.065708324	309.3704158	FALSE	0.241318411	0.50733917	1.256584902	1.096901869	0.449817989	0.613029929	0.819823869	0.882344334	0.592091749	1.575362818	0.781594045	0.778770919	0.177386383	0.757773924	0.195324992	0.327717813	0.838232999
TZ8633	Cr_LTWV_439	CROSS	Final	0	FALSE	FALSE		TRUE	XX	0.834833483	0.02340234	1.111	17745.24	2499	26	69	0.053338458	190.5545792	FALSE	0.194192872	0.460912217	1.196714983	1.126780754	0.5399193	0.682492708	0.781730563	0.953269479	0.677364574	1.603809965	0.786971404	0.929093988	0.1595357	0.73642265	0.197348647	0.323185177	0.919006778
IQ8982	Cr_LTWV_448	CROSS	Final	0	FALSE	FALSE		TRUE	XX	0.809163701	0.022241993	1.124	18878.61	2528	19	70	0.068506479	297.7640038	FALSE	0.266703958	0.399287872	1.266406798	1.065968312	0.508088255	0.633892009	0.786816404	1.144152035	0.781625344	1.752459533	0.867807536	1.046475352	0.178614845	0.792431224	0.234710077	0.262360418	0.793384684
TN8580	Cr_LTWV_458	CROSS	Final	0	FALSE	FALSE		TRUE	XX	0.855275023	0.025247971	1.109	17642.48	2457	28	168	0.047658687	159.4677132	FALSE	0.264191864	0.417174881	1.323169894	1.041690212	0.531557885	0.700071597	0.844892496	0.951623515	0.732039889	1.718579128	0.819952694	0.968231157	0.167380085	0.816835218	0.248377762	0.285844147	0.837127149
CC9269	Cr_LTWV_460	CROSS	Final	0	FALSE	FALSE		TRUE	XX	0.846745027	0.023056058	1.106	16084.87	2572	21	154	0.051772458	178.7939695	FALSE	0.230278498	0.389993796	1.312164683	0.997521195	0.45017457	0.639545063	0.716636137	0.907809566	0.64998966	1.433769635	0.702150475	0.809953638	0.155736403	0.645451234	0.201991048	0.269010546	0.797519594
FM5337	Cr_LTWV_464	CROSS	Final	0	FALSE	FALSE		TRUE	XX	0.851035104	0.02610261	1.111	16327.02	2582	16	154	0.057820119	213.7897115	FALSE	0.203405097	0.394560564	1.16095863	1.043362187	0.52097674	0.534818821	0.721993159	0.840018339	0.674770838	1.430144237	0.687081715	0.950632493	0.18049829	0.652844001	0.173577249	0.266919425	0.708641063
YQ4495	Cr_LTWV_470	CROSS	Final	0	FALSE	FALSE		TRUE	XX	0.813559322	0.02765388	1.121	17494.63	2623	26	110	0.07751812	488.9456468	FALSE	0.22544062	0.37520087	1.128632111	1.065184067	0.496037957	0.614131345	0.68615345	1.084847244	0.678836918	1.554076974	0.712790196	0.949091293	0.158791593	0.621104914	0.225211979	0.257507605	0.777724412
NG7210	Cr_LTWV_477	CROSS	Final	0	FALSE	FALSE		TRUE	XX	0.84403255	0.026220615	1.106	17002.82	2597	20	109	0.059119262	253.0614951	FALSE	0.237725232	0.432634043	1.256320799	1.119343544	0.447866808	0.653479725	0.802631429	1.019536588	0.735172042	1.561211349	0.867679451	1.025712033	0.169266011	0.739289006	0.223139418	0.283599967	0.85750467
KS4121	Cr_LTWV_495	CROSS	Final	0	FALSE	FALSE		TRUE	XX	0.82400722	0.024368231	1.108	16474.16	2462	14	52	0.048811772	140.3360599	FALSE	0.222833801	0.417805789	1.37305927	1.079812173	0.498841781	0.671475758	0.724346431	1.116232844	0.643613945	1.619080898	0.690718012	0.951854218	0.157155192	0.695027792	0.22386572	0.257919047	0.789782235
SR3277	Cr_LTWV_499	CROSS	Final	0	FALSE	FALSE		TRUE	XX	0.837850045	0.028906956	1.107	16542.53	2478	9	52	0.044304854	129.1389568	FALSE	0.220099322	0.414869994	1.275741856	1.0220322	0.506331206	0.690220835	0.800300721	1.174004102	0.687500574	1.637476089	0.835664112	1.021367247	0.158440078	0.726430529	0.215263303	0.280368211	0.773158564
RJ2450	Cr_LTWV_569	CROSS	Final	0	FALSE	FALSE		TRUE	XX	0.831531532	0.021621622	1.11	17746.1	2542	21	110	0.059492642	264.6523226	FALSE	0.244222724	0.38566228	1.056739441	1.141772226	0.492051874	0.588749197	0.671978768	1.033297666	0.631237414	1.541916564	0.713565379	0.810375402	0.140932402	0.726807727	0.19418355	0.230022418	0.814996136
HR9183	Cr_LTWV_649	CROSS	Final	0	FALSE	FALSE		TRUE	XX	0.819945848	0.029783394	1.108	15992.19	2486	9	58	0.059528882	285.2565826	FALSE	0.211978417	0.449781934	1.303010697	1.130176377	0.438276321	0.61461235	0.752492117	0.864234132	0.663948919	1.384112764	0.797701673	0.798952283	0.14319486	0.686772554	0.179900268	0.316842077	0.859294222
DB0451	Cr_LTWV_669	CROSS	Final	0	FALSE	FALSE		TRUE	XX	0.81719457	0.028506787	1.105	14746.2	2438	35	168	0.070410718	512.0179182	FALSE	0.249420272	0.499450871	1.311863829	1.198275206	0.510843641	0.651490091	0.80814067	1.094926513	0.663561001	1.595733666	0.739173727	0.922543062	0.181538355	0.690347572	0.2442664	0.316420606	0.887550985
MZ9818	Cr_LTWV_672	CROSS	Final	0	FALSE	FALSE		TRUE	XX	0.84403255	0.03164557	1.106	15986.99	2483	30	167	0.043916099	133.6439482	FALSE	0.211984816	0.392881862	1.120160545	1.075436691	0.518609062	0.596609967	0.754988708	0.901420238	0.711265667	1.472134154	0.662851312	0.913992958	0.182273164	0.668856193	0.191092834	0.276912594	0.703446811
DR4366	Cr_LTWV_712	CROSS	Final	0	FALSE	FALSE		TRUE	XX	0.829279279	0.025225225	1.11	18285.28	2826	19	211	0.061429826	280.8015695	FALSE	0.234505505	0.389876341	1.347750391	1.25516228	0.58686534	0.647515202	0.715876181	1.137690772	0.69750075	1.654718535	0.655882585	0.985218442	0.16280851	0.769361812	0.218755136	0.259662346	0.803870435
PW4336	Cr_LTWV_719	CROSS	Final	0	FALSE	FALSE		TRUE	XX	0.829268293	0.028003613	1.107	15476.28	2776	17	167	0.050113112	177.2016505	FALSE	0.215878708	0.422129782	1.220965001	1.08714734	0.455858811	0.562990477	0.751601656	0.981372589	0.686598968	1.437812934	0.659331439	0.79883522	0.138405326	0.739518651	0.185703504	0.32979495	0.694934303
LD7463	Cr_LTWV_724	CROSS	Final	0	FALSE	FALSE		TRUE	XX	0.821299639	0.025270758	1.108	14548.69	2825	17	209	0.068748078	453.9450348	FALSE	0.234385312	0.461347277	1.270904523	1.212548766	0.476950053	0.579777158	0.808320021	0.874786472	0.725907121	1.509963794	0.821242144	0.84227496	0.1648258	0.742540917	0.234179108	0.350546948	0.846261573
LP4755	Cr_LTWV_733	CROSS	Final	0	FALSE	FALSE		TRUE	XX	0.830477908	0.027953111	1.109	16295.59	2451	10	52	0.04539754	125.9735724	FALSE	0.217482143	0.389737327	1.178110095	1.095449698	0.4380326	0.594946212	0.756646394	1.008248196	0.696261961	1.61473127	0.662265035	0.919267071	0.154213495	0.767692327	0.17679629	0.274552795	0.824333415
TM2064	Cr_LTWV_741	CROSS	Final	0	FALSE	FALSE		TRUE	XX	0.76618705	0.026978417	1.112	16665.15	2456	12	52	0.084125851	773.4103145	FALSE	0.199278156	0.35979278	1.156725385	1.127922761	0.425798793	0.606175227	0.686282525	0.996450783	0.64001831	1.484055207	0.700083782	0.885500675	0.155714187	0.59633433	0.210559183	0.246802485	0.776290725
RQ7807	Cr_LTWV_757	CROSS	Final	0	FALSE	FALSE		TRUE	XX	0.833861476	0.028066999	1.1045	14150.93	2825	26	210	0.064907753	339.8564599	FALSE	0.234401495	0.378773595	1.23949419	0.972798005	0.460676318	0.44944031	0.682287138	1.004598027	0.618404427	1.372347615	0.716772495	0.78637921	0.148117436	0.616920426	0.204509475	0.313972217	0.696420481
LC4455	Cr_LTWV_790	CROSS	Final	0	FALSE	FALSE		TRUE	XX	0.814914645	0.02425876	1.113	14024.08	2907	38	167	0.072901384	508.895646	FALSE	0.211350732	0.402664501	1.154799291	0.959706308	0.4520795	0.622215413	0.697443153	0.822798951	0.691596068	1.40144645	0.632554771	0.799054082	0.135124709	0.620646683	0.203578387	0.275098219	0.750779977
GD3496	Cr_LTWV_795	CROSS	Final	0	FALSE	FALSE		TRUE	XX	0.879046763	0.023381295	1.112	16136.31	2914	27	166	0.051223369	174.3309938	FALSE	0.238530391	0.424632434	1.077012124	0.988082244	0.517156694	0.578818876	0.759467379	0.862155053	0.644571213	1.571239162	0.753456091	0.824909856	0.160941394	0.741681403	0.220248639	0.289533382	0.802414005
DK9454	Cr_LTWV_801	CROSS	Final	0	FALSE	FALSE		TRUE	XX	0.795229523	0.02610261	1.111	15943.18	2801	29	167	0.088175928	867.9853303	FALSE	0.214449095	0.431595269	1.115524176	1.137665308	0.467786298	0.583007997	0.671635248	1.111948979	0.678221137	1.490543521	0.787923233	0.915438592	0.150848223	0.673705099	0.187415588	0.289528232	0.795324518
RM9632	Cr_LTWV_810	CROSS	Final	0	FALSE	FALSE		TRUE	XX	0.86569873	0.02722323	1.102	14605.29	2805	22	167	0.050216341	196.404114	FALSE	0.21978339	0.471746903	1.182722206	1.043389122	0.551512526	0.586705256	0.726723023	1.0968629	0.680301484	1.497402724	0.797450824	0.824358884	0.156381702	0.65483126	0.152889816	0.324539959	0.788755344
WL2042	Cr_LTWV_818	CROSS	Final	0	FALSE	FALSE		TRUE	XX	0.856300997	0.024932004	1.103	14444.68	2804	18	166	0.045422798	155.1661458	FALSE	0.213365727	0.462315484	1.290578805	1.056028811	0.548367917	0.50267636	0.715834398	0.899500612	0.607005416	1.331562747	0.818709631	0.752110725	0.146282213	0.644458647	0.205612008	0.267918677	0.785271719
QF9592	Cr_LTWV_833	CROSS	Final	0	FALSE	FALSE		TRUE	XX	0.839028777	0.024280576	1.112	16162.95	2513	21	70	0.050614979	183.2141041	FALSE	0.238632149	0.443235862	1.150161176	1.123309646	0.475470072	0.593579684	0.731735139	0.946361773	0.658666804	1.453199877	0.775167799	0.935596413	0.153375447	0.64988128	0.212275578	0.28150798	0.83431541
RR1362	Cr_LTWV_837	CROSS	Final	0	FALSE	FALSE		TRUE	XX	0.808652988	0.024977698	1.121	17067.98	2517	20	70	0.071084999	355.9115242	FALSE	0.268397303	0.503222973	1.363020054	1.206352429	0.499941976	0.667741556	0.809879049	1.03849426	0.758789233	1.740041806	0.854582639	1.125850815	0.186958261	0.786150408	0.244375715	0.328509863	0.941646248
GG4402	Cr_LTWV_844	CROSS	Final	0	FALSE	FALSE		TRUE	XX	0.829596413	0.023318386	1.115	14014.1	2901	32	166	0.073636064	504.7425114	FALSE	0.217852086	0.413298159	1.256591952	1.150056359	0.525042793	0.74810392	0.764159183	1.151198067	0.648846713	1.498919395	0.753241604	0.836443547	0.164334541	0.682527088	0.194018939	0.313256029	0.776789324
FL1027	Cr_LTWV_885	CROSS	Final	0	FALSE	FALSE		TRUE	XX	0.743315508	0.02540107	1.122	13498.05	2484	29	70	0.096702174	1068.877536	FALSE	0.262852855	0.435840852	1.459025963	1.234771287	0.602235303	0.627572303	0.744700365	1.124903536	0.706028102	1.557040148	0.783002204	0.881979491	0.183878463	0.733439476	0.204177697	0.316119823	0.822933909
QN2444	Cr_LTWV_902	CROSS	Final	0	FALSE	FALSE		TRUE	XX	0.828519856	0.024368231	1.108	15095.8	2795	21	166	0.065941138	367.1928829	FALSE	0.179255187	0.420978092	1.146279291	1.148001625	0.59877592	0.597053586	0.778428569	0.946621074	0.673101241	1.646087269	0.764252438	0.844009735	0.168788698	0.699267464	0.204692731	0.268617807	0.751533666
KU1065	Cr_LTWV_912	CROSS	Final	0	FALSE	FALSE		TRUE	XX	0.829257246	0.029891304	1.104	16055.49	2545	17	154	0.065395344	350.2272554	FALSE	0.243654932	0.456230158	1.22076602	1.151817653	0.519136978	0.688113418	0.759739995	1.002211532	0.652113277	1.635079058	0.76951858	1.101243061	0.158512731	0.736944058	0.233938631	0.324686391	0.810003168
ZX7257	Cr_LTWV_920	CROSS	Final	0	FALSE	FALSE		TRUE	XX	0.795289855	0.030797101	1.104	13540.97	2466	14	52	0.071850428	613.3325967	FALSE	0.220589768	0.477661406	1.29687878	1.270071252	0.536298257	0.749133782	0.746992133	1.137658311	0.615317692	1.536447982	0.668341948	0.889744066	0.164168414	0.694854076	0.198065537	0.285946964	0.804816636
DI8544	Cr_LTWV_928	CROSS	Final	0	FALSE	FALSE		TRUE	XX	0.806715064	0.033575318	1.102	13396.73	2807	31	167	0.084869317	993.7651464	FALSE	0.243492276	0.446676204	1.218581056	1.076083583	0.577155818	0.608282819	0.704052467	0.812063908	0.634781825	1.447890765	0.708979042	0.761081314	0.147946564	0.664938441	0.220800169	0.286114621	0.788625351
MD8812	Cr_LTWV_962	CROSS	Final	0	FALSE	FALSE		TRUE	XX	0.853769301	0.026339691	1.101	15653.4	2480	27	134	0.040754448	117.9253821	FALSE	0.222507582	0.414287014	1.199994952	0.94675922	0.446420609	0.639349951	0.740989217	0.965668851	0.654745968	1.48881401	0.653021103	0.888688766	0.153065796	0.613285325	0.199892686	0.280514152	0.799826278
SA0280	Cr_LTWV_963	CROSS	Final	0	FALSE	FALSE		TRUE	XX	0.82774252	0.028105168	1.103	15310.27	2486	30	134	0.055176807	244.2474452	FALSE	0.274195012	0.484511338	1.414409951	1.182016943	0.456294986	0.725330063	0.747014852	1.07953672	0.645775626	1.573780087	0.81847015	0.956416759	0.198167619	0.684638426	0.214496526	0.317499274	0.843290089
IA0010	Cr_LTWV_970	CROSS	Final	0	FALSE	FALSE		TRUE	XX	0.846642468	0.02722323	1.102	13142.52	2796	27	166	0.061974522	340.9548631	FALSE	0.25862622	0.491153942	1.296859455	1.239640591	0.519154662	0.640288214	0.7989336	0.943122092	0.657864753	1.550996429	0.656951686	0.83888028	0.15134085	0.803346757	0.197907266	0.300703389	0.791172531
SU0986	Cr_LTWV_976	CROSS	Final	0	FALSE	FALSE		TRUE	XX	0.800180832	0.029837251	1.106	13521.78	2476	13	52	0.065826927	399.7429738	FALSE	0.225709864	0.439513015	1.326156382	1.125886948	0.44491171	0.687557209	0.79242503	0.850109726	0.60531954	1.477467778	0.796936269	0.825926526	0.138665136	0.692216358	0.20973564	0.288497437	0.765357595
TF4036	Cr_LTWV_984	CROSS	Final	0	FALSE	FALSE		TRUE	XX	0.818264014	0.022603978	1.106	15053.48	2484	9	52	0.052477487	188.1946361	FALSE	0.22207483	0.426280044	1.076494952	1.022421092	0.426811482	0.540805023	0.636995377	1.120072902	0.653602828	1.425517135	0.651809223	0.843658493	0.171455321	0.693128561	0.204869511	0.234032195	0.7237527
CJ6397	Cr_LTWV_998	CROSS	Final	0	FALSE	FALSE		TRUE	XX	0.811818182	0.021818182	1.1	14201.29	2423	36	135	0.059768285	323.2388972	FALSE	0.231387432	0.422003919	1.282207469	1.057861651	0.464535267	0.689937327	0.72197667	0.955124505	0.606142122	1.441629607	0.777887084	0.846613235	0.187799842	0.658461313	0.188574419	0.229627028	0.691204817
UD4250	Cr_B2930_077_F	CROSS	Final	0	FALSE	FALSE		TRUE	XO	0.612072792	0.027518864	1.1265	15388.35	2701	17	0	0.064005052	301.4171204	FALSE	0.142120498	0.280601879	0.881251061	0.90432046	0.397963387	0.487121743	0.6104618	0.716451069	0.459763384	1.229111611	0.572965902	0.680709746	0.121650467	0.597984829	0.171493367	0.231668758	0.556589878
YX0463	Cr_MH02_F180	CROSS	Final	0	FALSE	FALSE		TRUE	XX	0.914272475	0.022242817	1.079	10694.6	1575	20	84	0.01657808	46.92660901	FALSE	0.22805893	0.294447549	1.039683167	0.883342646	0.415069123	0.481457741	0.611242815	0.798533523	0.627980227	1.336468343	0.620219304	0.799188059	0.162044332	0.71278935	0.201129462	0.239934077	0.700633687
MW9614	Cr_MH02_F181	CROSS	Final	0	FALSE	FALSE		TRUE	XX	0.94611059	0.021555764	1.067	9279.57	1198	23	100	0.005955414	41.75876348	FALSE	0.224363864	0.352602576	1.02784944	0.887864494	0.404005824	0.503687176	0.691195881	0.770078853	0.554767134	1.209431146	0.65994443	0.706606079	0.151731182	0.545607226	0.189879505	0.252705697	0.649383595
SL0187	Cr_MH02_F182	CROSS	Final	0	FALSE	FALSE		TRUE	XX	0.887337058	0.033985102	1.074	8333.35	1419	11	1	0.022989238	80.28761535	FALSE	0.174359641	0.386159206	0.983757977	0.849958252	0.427319121	0.554038861	0.683398594	0.925078097	0.800518354	1.285557356	0.59315878	0.728398502	0.142319707	0.596518773	0.197279594	0.303719375	0.606598752
YQ4439	Cr_MH02_F190	CROSS	Final	0	FALSE	FALSE		TRUE	XX	0.928110599	0.01797235	1.085	10579.94	1865	17	101	0.02501208	63.10096941	FALSE	0.198677871	0.347733533	0.986111429	0.997642685	0.454444911	0.517583263	0.623822049	0.813804218	0.568339694	1.376094728	0.596411686	0.815221995	0.113516709	0.565504139	0.19811076	0.238564674	0.58922828
TR1119	Cr_MH02_F193	CROSS	Final	0	FALSE	FALSE		TRUE	XX	0.884543762	0.025139665	1.074	8690.55	1338	16	1	0.015836811	51.35084494	FALSE	0.266496252	0.381103449	1.102346329	0.79937369	0.400895053	0.588109821	0.715834709	0.794195654	0.612158922	1.277248879	0.630339582	0.759330212	0.133363194	0.631950526	0.185949026	0.269027737	0.680624065
YS5124	Cr_MH02_F195	CROSS	Final	0	FALSE	FALSE		TRUE	XX	0.927161654	0.023496241	1.064	7160.06	1530	15	103	0.020814847	77.23918488	FALSE	0.255724101	0.366198031	0.992030744	0.937003275	0.455024097	0.636447149	0.72541288	0.845523599	0.65572073	1.394680981	0.67806691	0.880020515	0.132959773	0.615916596	0.223880794	0.310472243	0.716614071
IB4203	Cr_MH02_F197	CROSS	Final	0	FALSE	FALSE		TRUE	XX	0.93268338	0.01810585	1.077	10590.37	1576	15	116	0.019266418	67.85512555	FALSE	0.205564171	0.327467407	1.036791271	0.896663926	0.358438949	0.51395764	0.636238578	0.670798287	0.708096333	1.320728552	0.564664098	0.858799327	0.143432235	0.553333046	0.175914584	0.275627843	0.720466065
TI1484	Cr_MH02_F198	CROSS	Final	0	FALSE	FALSE		TRUE	XX	0.944547996	0.021435228	1.073	8768.06	1616	21	106	0.011989897	44.1918702	FALSE	0.190806273	0.309646761	0.927457629	0.858343104	0.403852369	0.503646445	0.623285286	0.801317917	0.592035484	1.23391098	0.723193412	0.680538573	0.15009029	0.500681135	0.176778077	0.251595122	0.638339935
RU0516	Cr_MH02_F201	CROSS	Final	0	FALSE	FALSE		TRUE	XX	0.940375587	0.033802817	1.065	6926.71	1272	19	219	0.021370525	82.49932124	FALSE	0.245715599	0.392105503	1.039166205	0.879927482	0.43267312	0.62771529	0.848599465	0.700765873	0.573721381	1.473860487	0.684452206	1.076124602	0.177573553	0.615155209	0.231711831	0.342731393	0.819003873
LB0771	Cr_MH02_F202	CROSS	Final	0	FALSE	FALSE		TRUE	XX	0.953810624	0.020323326	1.0825	11221.52	1837	16	155	0.024943993	67.50821534	FALSE	0.164327126	0.336228985	1.066254917	0.942029313	0.363319791	0.424630562	0.991309628	0.802921588	0.61337506	1.22496783	0.62923744	0.767632248	0.128592214	0.662833604	0.190615902	0.272333893	0.741432587
LD5825	Cr_MH02_F203	CROSS	Final	0	FALSE	FALSE		TRUE	XX	0.918918919	0.027958993	1.073	8405.19	1496	10	64	0.020907094	58.02951629	FALSE	0.248417963	0.341455724	1.11407366	0.835079348	0.403798163	0.421763255	0.61854645	0.761553342	0.621520803	1.301457899	0.615691071	0.702542179	0.162399674	0.498858485	0.211179063	0.274592269	0.729668278
TB3149	Cr_MH02_F210	CROSS	Final	0	FALSE	FALSE		TRUE	XX	0.879740981	0.016651249	1.081	8818.73	1140	22	11	0.018631671	65.51269295	FALSE	0.231439327	2.135796045	1.84754579	0.743418045	0.386223591	0.502566927	0.637280264	1.240428613	0.628095264	5.863318613	1.1993796	1.420273186	0.142310806	0.635239153	0.147753769	0.269766859	0.63920798
YS5726	Cr_MH02_F211	CROSS	Final	0	FALSE	FALSE		TRUE	XX	0.89546716	0.028677151	1.081	8626.55	1708	14	1	0.017826708	47.46927645	FALSE	0.212251602	0.443282429	1.163732297	0.920066066	0.341039986	0.45359941	0.729607638	0.78177215	0.638029939	1.515784791	0.772150695	0.783510967	0.129020226	0.558739882	0.165071699	0.306495487	0.724970792
SL3541	Cr_MH02_F212	CROSS	Final	0	FALSE	FALSE		TRUE	XX	0.923005566	0.020408163	1.078	9752.8	1833	18	66	0.019834175	49.16969892	FALSE	0.186715566	0.380711092	0.930604328	0.759063887	0.400602811	0.578808002	0.648736622	0.803563918	0.553892087	1.222930566	0.575937033	0.749938305	0.12570746	0.595623682	0.188048517	0.229985181	0.705643343
SG8728	Cr_MH02_F213	CROSS	Final	0	FALSE	FALSE		TRUE	XX	0.899353647	0.020775623	1.083	11186.9	1486	22	0	0.022966176	59.70305813	FALSE	0.218291	0.401004679	1.027362188	0.844112167	0.395283703	0.459465905	0.622603118	0.627340802	0.559046648	1.41540528	0.621619826	0.782432892	0.130777941	0.607317385	0.184233313	0.286495764	0.67614788
BK0294	Cr_MH02_F217	CROSS	Final	0	FALSE	FALSE		TRUE	XX	0.941479401	0.02340824	1.068	8896.19	1243	27	117	0.010737975	50.96853258	FALSE	0.200647677	0.336436133	1.011668961	0.875093651	0.345541154	0.48324054	0.667364291	0.629370501	0.585081882	1.312359457	0.630606985	0.723792938	0.143319769	0.54528957	0.156583874	0.296756228	0.702772705
FA1331	Cr_MH02_F228	CROSS	Final	0	FALSE	FALSE		TRUE	XX	0.945275959	0.018709074	1.069	9291.81	1603	24	160	0.029335603	176.327661	FALSE	0.159172463	0.339654019	0.952559482	0.884973067	0.362469815	0.551453484	0.635936502	0.831807958	0.584923826	1.392839771	0.70115524	0.740760017	0.129146015	0.621299954	0.174669985	0.253018568	0.587614368
DP7949	Cr_MH02_F229	CROSS	Final	0	FALSE	FALSE		TRUE	XX	0.953110492	0.018570102	1.077	10492.83	1426	12	139	0.021434219	54.36966902	FALSE	0.215385257	0.374351014	1.088553278	0.828089602	0.370348279	0.468796496	0.712677413	0.796925452	0.509967483	1.335674505	0.579252918	0.772051314	0.104547623	0.514446734	0.1869849	0.252458207	0.68408645
YT6097	Cr_MH02_F230	CROSS	Final	0	FALSE	FALSE		TRUE	XX	0.929840973	0.028999065	1.069	8190.01	1167	15	78	0.007974962	45.9678463	FALSE	0.208546804	0.391086307	1.890840636	0.851037016	0.452624709	1.084003821	0.777288615	0.779364315	0.646519512	1.406469927	0.718558514	0.952624218	0.136629903	0.54346711	0.208913104	0.284859305	0.683515813
KE3420	Cr_MH02_F232	CROSS	Final	0	FALSE	FALSE		TRUE	XX	0.95510397	0.036389414	1.058	7262.18	1212	23	163	0.013975401	46.83682717	FALSE	0.303214705	0.471759119	1.964010601	0.999424311	0.437747297	1.106554665	0.905237727	0.800172867	0.638926537	1.395861703	0.682577337	0.830053699	0.15284665	0.680098742	0.272369976	0.454408959	0.853738044
VD6200	Cr_MH02_F240	CROSS	Final	0	FALSE	FALSE		TRUE	XX	0.968662301	0.033676333	1.069	8101.18	1280	20	177	0.006064134	51.48451402	FALSE	0.367477305	0.4132731	2.781816778	0.923569095	0.415988753	1.719872789	0.862837206	0.796303693	0.641881756	1.290305768	0.613614271	0.970475839	0.156890714	0.703601155	0.250333885	0.349331802	0.869009146
ZX3937	Cr_MH02_F242	CROSS	Final	0	FALSE	FALSE		TRUE	XX	0.882216015	0.02141527	1.074	9219.77	1408	12	11	0.018257193	53.85397682	FALSE	0.210091942	0.331136137	0.929090125	0.900130627	0.429620124	0.533961089	0.677240105	0.745463043	0.546759669	7.240742303	0.594374724	0.673552379	0.138940515	0.612487968	0.203801114	0.251958482	0.669430802
FP1802	Cr_MH02_F244	CROSS	Final	0	FALSE	FALSE		TRUE	XX	0.945013979	0.030754893	1.073	7963.48	1308	12	112	0.013258291	35.87136746	FALSE	0.224524998	0.420670439	2.482834602	0.937781146	0.406355087	1.602440439	0.755825484	0.768633957	0.530923766	1.413954968	0.654864579	0.761853001	0.168770469	0.580776352	0.207572608	0.310542685	0.666291746
ZD9190	Cr_MH02_F249	CROSS	Final	0	FALSE	FALSE		TRUE	XX	0.883208255	0.033771107	1.066	7309.93	971	12	0	0.027824511	136.8930439	FALSE	0.254585313	0.430100067	1.139272695	0.860473734	0.437487281	0.627092463	0.885644984	0.747339906	0.608624426	1.536951097	0.588514786	0.916151446	0.127087456	0.674425359	0.261698927	0.463342534	0.749939111
SR9484	Cr_MH02_F250	CROSS	Final	0	FALSE	FALSE		TRUE	XX	0.890140845	0.038497653	1.065	6758.45	1175	16	0	0.019698001	75.24943786	FALSE	0.234373381	0.418143419	1.964800588	0.901390555	0.432791755	1.177193574	0.847384062	0.795005163	0.608275865	1.405500473	0.527488071	0.915447039	0.136273917	0.657251616	0.216617822	0.366948223	0.789382569
VW7105	Cr_MH02_F251	CROSS	Final	0	FALSE	FALSE		TRUE	XX	0.902585411	0.025392428	1.083	7841.92	1672	10	2	0.023061718	69.59791423	FALSE	0.290745043	0.390210453	1.093354386	1.007151031	0.427063662	0.606228919	1.251733922	0.779910826	0.617833217	1.374407927	0.734258754	0.93943804	0.170748953	0.614772742	0.209132399	0.350679328	0.799038789
JX7108	Cr_MH02_F252	CROSS	Final	0	FALSE	FALSE		TRUE	XX	0.958410351	0.021256932	1.082	9277.11	1907	22	208	0.022733363	62.00003352	FALSE	0.164706491	0.31313636	1.303423359	0.899202586	0.392148047	0.758425964	0.597384408	0.722746744	0.569574018	1.282080503	0.60482207	0.644274017	0.120835063	0.563106486	0.14508831	0.249862334	0.697092199
HN0614	Cr_MH02_F260	CROSS	Final	0	FALSE	FALSE		TRUE	XX	0.915954416	0.034188034	1.053	7905.2	1637	13	221	0.049431144	702.9590527	FALSE	0.224788874	0.283484449	0.749001082	0.623766988	0.314603224	0.509158817	0.672089638	0.507893826	0.471841587	1.134696792	0.404544074	0.662602207	0.124601599	0.483226505	0.159641845	0.33319859	0.621110507
ZY6202	Cr_MH02_F276	CROSS	Final	0	FALSE	FALSE		TRUE	XX	0.926168224	0.023364486	1.07	9041.46	1362	12	57	0.017555458	44.2469409	FALSE	0.263563686	0.370515462	1.10291946	1.016871391	0.518168639	0.634853359	0.796442342	0.837586148	0.679204613	1.414816058	0.67422754	0.936685209	0.17773682	0.599571439	0.216889798	0.291435297	0.857605043
MV7672	Cr_MH02_F278	CROSS	Final	0	FALSE	FALSE		TRUE	XX	0.908286778	0.030726257	1.074	8679.83	1746	16	160	0.020180101	57.59280169	FALSE	0.273853211	0.356228073	0.997830316	0.904740962	0.407611553	0.496553361	0.70531315	0.714414708	0.618099485	1.401409532	0.609343556	0.897597967	0.182492001	0.601970142	0.238368655	0.332264476	0.67098069
DR3105	Cr_MH02_F282	CROSS	Final	0	FALSE	FALSE		TRUE	XX	0.895348837	0.025116279	1.075	8479.45	1254	13	1	0.020607292	68.92909069	FALSE	0.238222908	0.3732552	1.040986935	0.838615395	0.427857777	0.526802837	0.721154991	0.829534621	0.673392477	1.326146832	0.587419953	0.875410221	0.160151836	0.621384407	0.226075898	0.298368296	0.716083909
MQ5687	Cr_MH02_F283	CROSS	Final	0	FALSE	FALSE		TRUE	XX	0.890959925	0.027958993	1.073	8654.52	1338	21	27	0.012389633	34.21877249	FALSE	0.246922887	0.385809789	1.134088972	0.930727119	0.397595533	0.614476327	0.754518695	1.054130789	0.652606675	1.571316957	0.582007759	0.884855155	0.170431099	0.603730502	0.198046714	0.294412501	0.685306337
ZF9142	Cr_MH02_F286	CROSS	Final	0	FALSE	FALSE		TRUE	XX	0.926354794	0.025011579	1.0795	9346.06	1489	15	177	0.020191083	58.87362813	FALSE	0.228224522	0.341320312	1.347412757	0.78674867	0.390966903	0.496679903	0.654179433	0.757110511	0.59297717	1.281930615	0.608170739	0.827193522	0.126684404	0.609989687	0.230578456	0.305048342	0.633208028
ID7608	Cr_MH02_F288	CROSS	Final	0	FALSE	FALSE		TRUE	XX	0.924860853	0.023191095	1.078	9014.46	1269	24	23	0.020080167	54.65512147	FALSE	0.255589281	0.377726346	1.0354472	0.88080681	0.363748807	0.506186584	0.816243893	0.853850128	0.635090553	1.40396612	0.598149915	0.813359639	0.149537479	0.597262452	0.200788454	0.334351603	0.691111641
KE1143	Cr_MH02_F290	CROSS	Final	0	FALSE	FALSE		TRUE	XX	0.945269017	0.025046382	1.078	9711.2	1692	15	148	0.020568856	47.08401677	FALSE	0.262892403	0.358349221	0.906788288	0.871880131	0.359584908	0.540921971	0.656458703	0.76005046	0.572431989	1.240114848	0.563061363	0.802372739	0.114609966	0.526505623	0.221187968	0.263098351	0.646573207
WK0174	Cr_MH02_F293	CROSS	Final	0	FALSE	FALSE		TRUE	XX	0.908878505	0.027102804	1.07	9430.38	1305	17	1	0.021544037	42.67804043	FALSE	0.260328988	0.377291462	1.035695815	0.975464913	0.412072687	0.54854658	0.747796344	0.924777639	0.625425813	1.430802051	0.655011063	0.923080994	0.173588005	0.63083387	0.209959836	0.341767955	0.776003069
GV2399	Cr_MH02_F300	CROSS	Final	0	FALSE	FALSE		TRUE	XX	0.941833411	0.031642624	1.0745	9829.78	1601	16	195	0.019628816	53.43279735	FALSE	0.261755615	0.346498106	1.008873081	0.911515862	0.414963527	0.520967938	0.743963783	0.720362033	0.660849	1.493929736	0.583532922	0.832673809	0.146798816	0.600623845	0.240391962	0.29715824	0.760444316
UC5472	Cr_MH02_F400	CROSS	Final	0	FALSE	FALSE		TRUE	XX	0.88700565	0.048493409	1.062	5267.7	1202	37	0	0.050322864	470.1706557	FALSE	0.330694381	0.50667239	1.272470974	1.066309035	0.482753049	0.626269095	1.079787394	2.805017322	0.831102182	2.528426212	0.684358923	0.856730047	0.145034734	0.742448751	0.285323568	0.445165513	0.830153001
BE6599	Cr_MH02_F401	CROSS	Final	0	FALSE	FALSE		TRUE	XX	0.883116883	0.039888683	1.078	6465.46	1742	25	108	0.04989787	333.819031	FALSE	0.287682715	0.426574693	2.506860995	1.055609963	0.482409887	0.574437422	0.874802924	0.81154366	0.563610653	1.510024919	0.595008283	0.77767134	0.166113568	0.714876081	0.21050332	0.368110141	0.827474477
JF4153	Cr_MH02_F402	CROSS	Final	0	FALSE	FALSE		TRUE	XX	0.890551918	0.037418148	1.069	6984.6	1330	17	0	0.028307709	146.8440862	FALSE	0.25441683	0.388282748	3.759556296	1.068207073	0.467886438	0.552501152	0.864043652	0.964979985	0.687655619	1.36328478	0.521862321	0.771840816	0.173381419	0.749935484	0.220341869	0.355639508	0.748790107
FE6653	Cr_MH02_F403	CROSS	Final	0	FALSE	FALSE		TRUE	XY	0.592883549	0.671441774	1.082	5047.7	1349	31	3	0.079758401	878.6241296	FALSE	0.279929732	0.474077742	1.208670415	1.02739957	0.502407503	0.632764023	0.923986038	1.128633889	0.763120544	1.644314776	0.642669534	0.913288086	0.165818249	0.737366216	0.296967211	0.392654444	0.804129359
BJ0805	Cr_MH02_F408	CROSS	Final	0	FALSE	FALSE		TRUE	XX	0.861136999	0.048462255	1.073	5179.21	1433	27	1	0.068408741	689.253098	FALSE	0.298114941	0.478065152	1.232620328	1.095340714	0.593140609	0.750500503	0.883725445	1.068888805	0.684467272	1.510075749	0.660911557	1.037609906	0.17493014	0.724820913	0.303328091	0.408556487	0.997256264
QA0802	Cr_MH02_F409	CROSS	Final	0	FALSE	FALSE		TRUE	XX	0.895550351	0.044028103	1.0675	5913.61	1804	28	151	0.062044806	643.9898474	FALSE	0.37016279	0.536051186	1.160542362	1.013762416	0.510855089	0.680801916	0.981294962	0.814899263	0.629564216	1.601558605	0.733223325	0.898435315	0.186518756	0.761125043	0.263290756	0.428840949	0.987551711
AD0996	Cr_MH02_F413	CROSS	Final	0	FALSE	FALSE		TRUE	XX	0.919962773	0.027919963	1.0745	8893.13	1391	21	139	0.033891939	135.4510488	FALSE	0.351394843	0.453496128	1.19924032	1.034618864	0.472274669	0.595965654	0.844809425	0.795108139	0.762948483	1.681185375	0.921722729	1.054859207	0.12998798	0.641843764	0.273357076	0.350495272	0.816248053
VH4739	Cr_MH02_F416	CROSS	Final	0	FALSE	FALSE		TRUE	XX	0.913302752	0.031192661	1.09	8856.7	1788	43	177	0.070466725	563.2905601	FALSE	0.262061557	0.414262755	1.126379188	0.92912734	0.450393603	0.619305318	0.759312354	1.25148225	0.750279642	1.672858265	0.707938804	1.060553299	0.150168837	0.803685552	0.219269084	0.325290541	0.80074992
DJ7590	Cr_MH02_F419	CROSS	Final	0	FALSE	FALSE		TRUE	XX	0.934395501	0.033739456	1.067	6614.36	1718	11	178	0.03010213	148.7863566	FALSE	0.231012685	0.383710861	1.056641137	0.877485357	0.422868115	0.481377218	0.768328839	0.843014877	0.693491614	1.374585951	0.552585971	0.639669287	0.116111088	0.646019112	0.249910974	0.372523073	0.73506785
PP8351	Cr_MH02_F420	CROSS	Final	0	FALSE	FALSE		TRUE	XX	0.875528417	0.045091592	1.0645	4915.68	1333	24	17	0.065649023	892.1092381	FALSE	0.273003662	0.442257795	1.180100032	0.979110749	0.514272174	0.555568555	0.753302951	0.835081991	0.655046044	1.471209004	0.65321517	0.840778044	0.153589989	0.682305725	0.236996473	0.35376555	0.77547687
EQ0441	Cr_MH02_F421	CROSS	Final	0	FALSE	FALSE		TRUE	XX	0.960295476	0.020313943	1.083	9320.38	1748	15	220	0.023074896	82.1094169	FALSE	0.243659536	0.3661867	1.081608005	0.923352692	0.364040865	0.50577325	0.68484316	0.81885054	0.600189979	1.390179041	0.633986876	0.850501602	0.18464908	0.64289209	0.19022825	0.283679354	0.681409824
TR6375	Cr_MH02_F423	CROSS	Final	0	FALSE	FALSE		TRUE	XX	0.956460674	0.022940075	1.068	9761.37	1333	21	220	0.012047002	69.3537623	FALSE	0.21708017	0.394616713	1.011538271	0.926201895	0.453829709	0.565289465	0.707482611	0.78247208	0.594281296	1.409535657	0.618765562	0.831747947	0.134817132	0.564469908	0.202225699	0.254882238	0.715575737
KT4067	Cr_MH02_F425	CROSS	Final	0	FALSE	FALSE		TRUE	XX	0.910606762	0.025474757	1.0795	8643.24	1849	15	178	0.028776631	105.3990009	FALSE	0.237642495	0.33957192	0.998353014	0.959362984	0.438956001	0.546207507	0.72438153	0.844706844	0.644781707	1.40977303	0.654615987	0.873746895	0.131200871	0.589941131	0.208602443	0.285772621	0.612964917
TB1021	Cr_MH02_F429	CROSS	Final	0	FALSE	FALSE		TRUE	XX	0.911970191	0.022822543	1.0735	8512.22	1673	12	99	0.038990775	240.0872244	FALSE	0.262563801	0.337632378	0.992808359	0.871688323	0.39919096	0.501044569	0.698525441	0.671975365	0.629800688	1.446744165	0.594792181	0.78522436	0.130518292	0.569299409	0.200300349	0.297219873	0.647774854
LD7366	Cr_MH02_F430	CROSS	Final	0	FALSE	FALSE		TRUE	XX	0.914953271	0.028037383	1.07	7841.08	1695	11	154	0.038700857	229.1988603	FALSE	0.23147336	0.372525445	0.948849474	0.905233006	0.459758381	0.51676587	0.715973246	0.871436621	0.846695115	1.41817287	0.629760578	0.794788968	0.126513263	0.686640533	0.220122875	0.289756184	0.678860988
VX5930	Cr_MH02_F431	CROSS	Final	0	FALSE	FALSE		TRUE	XX	0.876623377	0.019480519	1.078	9893.97	1745	13	1	0.035007687	124.0615721	FALSE	0.206287231	0.335557867	1.07843447	0.891451924	0.378007959	0.486862122	0.613707039	0.630687075	0.527998282	1.251873416	0.642815673	0.778150608	0.114817391	0.538004375	0.182333251	0.252476973	0.602993444
EK2330	Cr_MH02_F432	CROSS	Final	0	FALSE	FALSE		TRUE	XX	0.884722222	0.031018519	1.08	10142.58	1308	13	1	0.040865363	199.5192838	FALSE	0.196202604	0.342615099	0.954688347	0.979336916	0.403743549	0.465266375	0.696174163	1.070142241	0.67280732	1.487097423	0.636228845	0.789345751	0.137243228	0.660877413	0.186638959	0.268472206	0.673103103
JL7671	Cr_MH02_F433	CROSS	Final	0	FALSE	FALSE		TRUE	XX	0.894167451	0.025399812	1.063	8491.45	1028	19	1	0.013687678	62.25214845	FALSE	0.278868824	0.334336398	1.114650937	0.794093108	0.438558911	0.590829768	0.763356299	0.799981386	0.610378849	1.418132761	0.622744232	0.867461046	0.182418838	0.644177562	0.216570848	0.3411668	0.786791644
CD4039	Cr_MH02_F437	CROSS	Final	0	FALSE	FALSE		TRUE	XX	0.89292365	0.037243948	1.074	6768.16	1703	26	103	0.071659345	819.1506038	FALSE	0.199167984	0.347657468	0.958754489	0.877934839	0.412520039	0.561305024	0.738605901	0.800217955	0.66354853	1.443672386	0.561748277	0.95284446	0.152922006	0.622178325	0.210988043	0.317959572	0.688222902
WV0575	Cr_MH02_F438	CROSS	Final	0	FALSE	FALSE		TRUE	XX	0.938967136	0.01971831	1.065	9458.87	1369	25	220	0.046676916	318.5352524	FALSE	0.233854531	0.372666014	1.095373779	0.904653357	0.35860514	0.523423953	0.721756278	0.907402099	0.756009835	1.562131355	0.718690373	0.907930703	0.127182189	0.584213445	0.194314932	0.275297107	0.690991509
PW5264	Cr_MH02_F439	CROSS	Final	0	FALSE	FALSE		TRUE	XX	0.880645161	0.031336406	1.085	8278.27	1633	30	76	0.070082363	623.5223059	FALSE	0.296680185	0.441275536	1.127892057	0.913354594	0.463381593	0.605440183	0.87180004	0.892456519	0.855854688	2.11070557	0.820823233	1.212209145	0.164164647	0.636002108	0.274211735	0.381842861	0.856700275
JY8053	Cr_MH02_F442	CROSS	Final	0	FALSE	FALSE		TRUE	XX	0.898611111	0.02037037	1.08	10424.32	1528	31	70	0.039087415	195.4293976	FALSE	0.270329281	0.387459179	1.058294048	0.895789505	0.444345362	0.491638596	0.701436374	0.783264222	0.673616824	1.737474782	0.693570156	1.074985778	0.169987042	0.707575861	0.21114079	0.308605144	0.730790796
UX9413	Cr_MH02_F443	CROSS	Final	0	FALSE	FALSE		TRUE	XX	0.944911298	0.031279178	1.071	8641.87	1505	17	219	0.032061278	155.4830483	FALSE	0.301092351	0.420395277	1.307356409	0.992841033	0.516439339	0.584133046	0.859189355	0.848543507	0.780734085	1.669662385	0.678325657	1.054633237	0.195096734	0.750879425	0.24057302	0.340551417	0.834657619
TM1004	Cr_MH02_F445	CROSS	Final	0	FALSE	FALSE		TRUE	XX	0.916044776	0.038712687	1.072	5059.18	1856	20	167	0.04838568	323.2729698	FALSE	0.321790968	0.446909938	1.10077021	0.972883996	0.509765913	0.683311657	0.959245435	0.817720661	0.739051861	1.402795148	0.633698922	0.926829146	0.144489679	0.694182973	0.269410989	0.400855088	0.959245435
PE6880	Cr_MH02_F447	CROSS	Final	0	FALSE	FALSE		TRUE	XX	0.96287594	0.022086466	1.064	7586.79	1520	11	177	0.019945091	91.33824917	FALSE	0.243317606	0.381188796	1.03614285	0.996336828	0.43351658	0.55267103	0.733379827	0.850688965	0.660226375	1.437761889	0.543576277	0.75578719	0.124426771	0.636369123	0.220910243	0.311066929	0.70187771
BJ4963	Cr_MH02_F448	CROSS	Final	0	FALSE	FALSE		TRUE	XX	0.901401869	0.023831776	1.07	6059.92	1529	21	12	0.049187349	387.2027031	FALSE	0.268815605	0.399840523	1.181864558	1.024271616	0.500171946	0.587796922	0.821133488	0.890606397	0.667831034	1.643422107	0.590272204	0.840770724	0.180530554	0.605123895	0.256109159	0.337463421	0.762551818
WF9733	Cr_MH02_F449	CROSS	Final	0	FALSE	FALSE		TRUE	XX	0.922748815	0.033175355	1.055	6029.31	1086	25	22	0.030907094	157.3474303	FALSE	0.226891479	0.347800755	1.003265028	0.820988906	0.385284288	0.556945605	0.680508582	0.677689024	0.608361072	1.319055508	0.492593343	0.818666917	0.116431154	0.599570686	0.232862308	0.340503075	0.665083942
HC3532	Cr_MH02_F452	CROSS	Final	0	FALSE	FALSE		TRUE	XX	0.897652582	0.033802817	1.065	5937.11	1662	18	178	0.060696244	504.6844073	FALSE	0.229573131	0.414006424	1.046637883	0.866752261	0.443987361	0.514055169	0.760134659	0.833234247	0.65149587	1.484898549	0.48845347	0.973538295	0.140135616	0.63566324	0.235131394	0.381499003	0.661601803
ZW0062	Cr_MH02_F453	CROSS	Final	0	FALSE	FALSE		TRUE	XX	0.908669448	0.023180343	1.0785	8444.61	1675	32	95	0.036089392	129.8865535	FALSE	0.194680503	0.374203401	0.960968544	0.804063637	0.410084297	0.596593903	0.737630691	0.712052231	0.770669536	1.643297656	0.526845231	0.976007731	0.170878325	0.708973342	0.233166613	0.297231182	0.653316507
ZT8831	Cr_MH02_F458	CROSS	Final	0	FALSE	FALSE		TRUE	XX	0.881457565	0.026752768	1.084	8634.88	1812	15	34	0.037327037	121.2703609	FALSE	0.232081859	0.398036601	0.891731692	0.770131916	0.342448132	0.526469126	0.804990518	0.779396661	0.539439769	1.395618003	0.605914313	0.857915373	0.138392126	0.5460409	0.187842702	0.292650128	0.71743868
QA5822	Cr_MH02_F460	CROSS	Final	0	FALSE	FALSE		TRUE	XX	0.940575673	0.017641597	1.077	10855.81	1751	17	211	0.02203602	49.88116705	FALSE	0.165809815	0.357688618	1.042943738	0.918310026	0.404852299	0.452752912	0.61579923	0.776450518	0.56485877	1.278209442	0.572596562	0.629800948	0.138543312	0.563477022	0.158624723	0.228449079	0.619115427
BR0146	Cr_MH02_F461	CROSS	Final	0	FALSE	FALSE		TRUE	XX	0.93697479	0.02194211	1.071	8956.88	1536	27	193	0.014508017	49.68448218	FALSE	0.232223658	0.818253458	1.540268073	0.96350489	0.371669499	0.547400287	0.706942406	0.912817611	0.585136632	2.629374701	0.752047386	1.022007389	0.157755783	0.587146259	0.191919456	0.306356595	0.634037575
VH7761	Cr_MH02_F462	CROSS	Final	0	FALSE	FALSE		TRUE	XX	0.942001871	0.023854069	1.069	8430.23	1267	21	178	0.021860312	105.4430785	FALSE	0.234513111	0.421815187	1.281459353	0.840902097	0.398209669	0.504256569	0.731177956	0.76273106	0.599034503	1.641829021	0.666055195	0.779931061	0.138667591	0.528099328	0.178880006	0.302008286	0.669020712
RG3264	Cr_MH02_F463	CROSS	Final	0	FALSE	FALSE		TRUE	XX	0.889044944	0.021535581	1.068	9736.13	1369	18	0	0.01887327	70.30699341	FALSE	0.21240469	0.356301677	0.962805397	0.842429044	0.381671096	0.524849112	0.654880223	0.731912871	0.562646465	1.450576127	0.67932525	0.740232397	0.128490458	0.624169874	0.17101248	0.24907223	0.623553612
YC9353	Cr_MH02_F468	CROSS	Final	0	FALSE	FALSE		TRUE	XX	0.940898345	0.040189125	1.0575	5552.52	1490	14	169	0.025217439	118.0196798	FALSE	0.262043157	0.436918694	1.127956217	0.96532737	0.467715519	0.680051521	0.863391682	0.770641011	0.664563059	1.386937701	0.557944812	0.811163149	0.155424911	0.599727639	0.230165742	0.343267531	0.792432916
TR6436	Cr_MH02_F469	CROSS	Final	0	FALSE	FALSE		TRUE	XX	0.971521942	0.029878618	1.071	8367.64	1571	14	172	0.029035801	116.6127615	FALSE	0.197546768	0.314664635	0.91089018	0.856514028	0.346095246	0.470742118	0.686693122	0.791382154	0.539817757	1.208465167	0.601483899	0.698046385	0.130980797	0.577582294	0.184998426	0.252161937	0.613434702
VA1746	Cr_MH02_F470	CROSS	Final	0	FALSE	FALSE		TRUE	XX	0.959737828	0.019194757	1.068	9704.39	1445	19	177	0.012171096	38.56940284	FALSE	0.186616552	0.293475396	0.928754825	0.980690077	0.392811871	0.470302565	0.647232781	0.639298228	0.548514582	1.113001316	0.649705888	0.663204932	0.133856931	0.50111336	0.153538743	0.247516819	0.602510758
WC5172	Cr_MH02_F472	CROSS	Final	0	FALSE	FALSE		TRUE	XX	0.893190299	0.019589552	1.072	8452.96	1642	18	51	0.031251922	158.0174693	FALSE	0.253757257	0.339407725	0.941681941	0.947360425	0.37963032	0.611265149	0.698571842	0.735955195	0.601919311	1.385905018	0.694431281	0.861000147	0.133207772	0.632559465	0.223472008	0.27292214	0.671953948
HE7286	Cr_MH02_F473	CROSS	Final	0	FALSE	FALSE		TRUE	XX	0.945327103	0.019626168	1.07	8734.26	1499	24	177	0.013410938	48.70782106	FALSE	0.180553384	0.335804106	1.123964852	0.938602817	0.392935456	0.622491281	0.673669063	0.828118343	0.589861151	1.406072359	0.55917738	0.827316902	0.15238843	0.602111761	0.171508541	0.27890174	0.771330469
MH3839	Cr_MH02_F476	CROSS	Final	0	FALSE	FALSE		TRUE	XX	0.885793872	0.032033426	1.077	8480.93	1686	15	13	0.024774874	73.9086045	FALSE	0.314470125	0.437687702	1.305516768	0.975836052	0.422123377	0.801798593	0.927492314	0.783050655	0.713247013	1.687078569	0.694381164	1.11343884	0.180286772	0.746851807	0.29973118	0.384391678	0.845307958
WY5493	Cr_MH02_F477	CROSS	Final	0	FALSE	FALSE		TRUE	XX	0.884471469	0.038353601	1.069	8029.26	1173	9	0	0.027297386	119.7985144	FALSE	0.342123781	0.432916732	2.511191046	0.968707234	0.490580843	1.450694505	0.894976881	0.879657906	0.730079944	1.647973016	0.618363515	1.200858209	0.14621526	0.771677812	0.246224505	0.4143596	0.843539997
GR1021	Cr_MH02_F478	CROSS	Final	0	FALSE	FALSE		TRUE	XX	0.885078777	0.033364226	1.079	8998.44	1410	10	1	0.014931913	39.0702581	FALSE	0.245820363	0.472526304	1.045958978	1.064517749	0.484861775	1.044292023	0.922493145	0.757797947	0.627553161	2.615564228	0.819364168	1.016176041	0.151026164	0.675783739	0.228706287	0.354394728	0.818808516
TL9331	Cr_MH02_F479	CROSS	Final	0	FALSE	FALSE		TRUE	XX	0.920433145	0.024482109	1.062	9235.05	1232	24	99	0.02021085	86.17850529	FALSE	0.275147379	0.414616023	1.114666321	0.810932201	0.422304124	0.6666991	0.809741087	0.757332062	0.662692625	2.001504981	0.66182636	1.212012835	0.181049358	0.653921693	0.265726749	0.357334259	0.708712946
NP0503	Cr_MH02_F481	CROSS	Final	0	FALSE	FALSE		TRUE	XX	0.904295051	0.035480859	1.071	7680.11	1448	21	130	0.044605754	334.5255206	FALSE	0.312756086	0.431764855	1.27628441	0.897253201	0.430983615	0.838920675	0.891914733	0.778765258	0.614053997	1.819636261	0.536450905	1.025376426	0.167836218	0.688401926	0.317183108	0.449863562	0.822384446
JP5044	Cr_MH02_F485	CROSS	Final	0	FALSE	FALSE		TRUE	XX	0.907075472	0.033962264	1.06	8010.96	1047	27	148	0.020622666	111.9397533	FALSE	0.36050615	0.397205876	1.715774597	0.975039315	0.445514699	1.042446974	0.870058126	0.780306075	0.634256146	1.510680551	0.668584121	0.936217496	0.177382008	0.745978101	0.302835153	0.418926122	0.845217155
WY0955	Cr_MH02_F493	CROSS	Final	0	FALSE	FALSE		TRUE	XX	0.909836066	0.029411765	1.037	7113.97	1488	39	201	0.06869866	1047.412831	FALSE	0.314592408	0.364353674	0.771299618	0.664045817	0.320777425	0.426766109	0.818390081	0.497050383	0.569302616	1.136074998	0.414958351	0.678524377	0.131853297	0.484258645	0.207619744	0.298848731	0.636775518
TD1948	Cr_MH02_F494	CROSS	Final	0	FALSE	FALSE		TRUE	XX	0.885332059	0.031533684	1.0465	6598.11	1313	44	102	0.081656051	1703.918499	FALSE	0.275988041	0.387231986	0.863277257	0.730815121	0.332519365	0.50453827	0.768250073	0.578801939	0.494080733	1.143812053	0.439064995	0.633211443	0.12079213	0.511813079	0.204300868	0.328578843	0.671555745
GG7409	Cr_MH02_F495	CROSS	Final	0	FALSE	FALSE		TRUE	XX	0.903654485	0.025628856	1.0535	7201.61	1394	22	208	0.059867121	835.3686894	FALSE	0.237169097	0.331314676	0.778436744	0.874109758	0.38310863	0.454759247	0.684152308	0.652909306	0.561263168	1.164183672	0.528076157	0.699982095	0.116085108	0.49030684	0.194123184	0.286047038	0.627220616
EF0588	Cr_MH02_F496	CROSS	Final	0	FALSE	FALSE		TRUE	XX	0.838249286	0.03472883	1.051	6956.28	1216	47	1	0.070732484	1069.577965	FALSE	0.247977361	0.340555576	1.381485472	0.772395571	0.325317547	0.562082018	0.867992641	0.572576132	0.620446545	1.473057401	0.404239037	0.981559084	0.146630092	0.562225773	0.201975764	0.349468385	0.699080525
UN2356	Cr_MH02_F497	CROSS	Final	0	FALSE	FALSE		TRUE	XX	0.903660886	0.031791908	1.038	7812.97	1467	34	219	0.075541401	1273.437277	FALSE	0.237041725	0.339051582	1.014722892	0.65724042	0.312557178	0.452324761	0.771537537	0.588380567	0.562526124	1.147450899	0.382824946	0.797775957	0.118008893	0.612827095	0.216306974	0.41098325	0.616282887
EC1496	Cr_MH02_M183	CROSS	Final	0	FALSE	FALSE		TRUE	XY	0.65787037	0.731944444	1.08	10416.01	1280	27	2	0.01968702	56.72768621	FALSE	0.161194228	0.344085832	0.975997928	0.961981038	0.436923723	0.541762375	0.61607109	0.808179279	0.551651003	1.301266566	0.669162459	0.764016477	0.152841698	0.602246213	0.149289472	0.274577422	0.693452
MR6755	Cr_MH02_M185	CROSS	Final	0	FALSE	FALSE		TRUE	XY	0.653597786	0.742158672	1.084	10968.49	1140	24	3	0.026101472	84.13984258	FALSE	0.188540081	0.334230143	1.097051639	1.018007031	0.379906439	0.553676939	0.707663494	0.804577472	0.772759054	1.426540929	0.703378492	0.791631296	0.140037507	0.685600293	0.201303916	0.293841721	0.7315501
DV2231	Cr_MH02_M186	CROSS	Final	0	FALSE	FALSE		TRUE	XY	0.64471243	0.731910946	1.078	8761.92	1220	20	0	0.024703492	73.59529508	FALSE	0.210113682	0.329151471	0.988595714	0.912470877	0.398200236	0.575216163	0.710003918	0.843422111	0.532417341	1.304393953	0.637759507	0.730204962	0.162179001	0.572477038	0.192195242	0.286352649	0.655335557
GM1349	Cr_MH02_M187	CROSS	Final	0	FALSE	FALSE		TRUE	XY	0.67472119	0.722583643	1.076	8852.04	1238	18	1	0.015930156	29.96311472	FALSE	0.248756107	0.342858667	1.200174787	0.988246332	0.477516832	0.503951405	0.68662108	0.689558255	0.562807868	1.346920555	0.738586479	0.789196259	0.155557293	0.563033804	0.178376881	0.309307094	0.648098903
DI7179	Cr_MH02_M189	CROSS	Final	0	FALSE	FALSE		TRUE	XY	0.626327945	0.68960739	1.0825	8750.91	1460	21	1	0.041369427	189.8166779	FALSE	0.195636908	0.357448744	0.995896996	0.934074818	0.43389798	0.562798933	0.639476717	0.705641302	0.558113704	1.356773956	0.611251065	0.796603323	0.140785439	0.66861656	0.190037488	0.284199177	0.619364511
QK6445	Cr_MH02_M194	CROSS	Final	0	FALSE	FALSE		TRUE	XY	0.648029331	0.71127406	1.091	8355.29	1420	18	0	0.03255436	91.26361476	FALSE	0.222733198	0.34158009	1.014806443	0.852992749	0.422008199	0.529963784	0.679928694	0.782618154	0.551866082	1.281583605	0.618291082	0.687349145	0.113102027	0.540017298	0.188264009	0.295381802	0.67418383
WH3658	Cr_MH02_M200	CROSS	Final	0	FALSE	FALSE		TRUE	XY	0.639275766	0.675951718	1.077	7730.89	1158	15	0	0.02280145	78.91613174	FALSE	0.230374509	0.398789788	0.995486931	0.845180822	0.417416363	0.542240283	0.74894352	0.775201816	0.635114453	1.435669107	0.569145335	0.73290397	0.153410538	0.643522282	0.249001084	0.360889883	0.781410675
KS5958	Cr_MH02_M204	CROSS	Final	0	FALSE	FALSE		TRUE	XY	0.67160037	0.740055504	1.081	8233.14	1238	14	3	0.024001757	69.47526952	FALSE	0.195915632	0.454140452	1.031441754	0.865769762	0.401791018	0.489971271	0.791921837	0.72997703	0.66681762	1.493598593	0.697668563	0.817792903	0.11417278	0.620541206	0.232232293	0.331708364	0.68491522
WX6798	Cr_MH02_M207	CROSS	Final	0	FALSE	FALSE		TRUE	XY	0.655607477	0.707476636	1.07	8417.69	1253	12	1	0.017490665	45.05120859	FALSE	0.203737571	0.359362188	0.953111681	0.884209178	0.409732293	0.53637034	0.708507798	0.764104989	0.56856444	1.350726637	0.6302203	0.81328712	0.165009613	0.668116676	0.189125489	0.256364827	0.640555675
ZU4695	Cr_MH02_M208	CROSS	Final	0	FALSE	FALSE		TRUE	XY	0.628780935	0.72731439	1.091	10240.02	1483	9	1	0.036170657	110.4405277	FALSE	0.219042518	0.570604294	0.946677738	0.962009738	0.431639736	0.558983224	0.664940037	1.115720359	0.615037796	1.819527503	0.651170534	0.809568645	0.160058264	0.603612038	0.136327844	0.23554639	0.643748674
AY3116	Cr_MH02_M221	CROSS	Final	0	FALSE	FALSE		TRUE	XY	0.660368664	0.732718894	1.085	8472.86	1466	11	2	0.023793103	66.19130522	FALSE	0.232271056	0.391367287	1.126538225	0.917045784	0.439993138	0.554476331	0.723722619	0.699645741	0.598971345	1.292951939	0.605816732	0.735879082	0.125459417	0.579261352	0.16842012	0.27676607	0.6851288
MD8960	Cr_MH02_M222	CROSS	Final	0	FALSE	FALSE		TRUE	XY	0.641165756	0.696265938	1.098	9383.56	1494	22	2	0.051346365	228.2448842	FALSE	0.20940879	0.350186913	0.998768031	0.907118383	0.419137288	0.479242407	1.251230842	0.714440982	0.583573809	1.331903847	0.553947527	0.784776759	0.136728487	0.643465789	0.190546014	0.261201499	0.654655571
LQ2547	Cr_MH02_M223	CROSS	Final	0	FALSE	FALSE		TRUE	XY	0.649611695	0.705801736	1.0945	10693.03	1375	20	1	0.034433341	114.5269109	FALSE	0.203777677	0.314317013	0.895162884	0.865704431	0.392311774	0.544279982	0.639575738	0.858971071	0.624706233	1.433925251	0.585708853	0.738892807	0.163751589	0.562142091	0.18404519	0.256241778	0.617785835
ZA1008	Cr_MH02_M224	CROSS	Final	0	FALSE	FALSE		TRUE	XY	0.669452182	0.701949861	1.077	8626.09	1237	17	2	0.015350318	43.59539579	FALSE	0.223507874	0.395196236	1.01679853	0.842791622	0.375720446	0.446436112	0.663220202	0.715967133	0.534540876	1.208078609	0.65638049	0.730689902	0.143170241	0.592736391	0.180382911	0.255040106	0.677942972
IT5875	Cr_MH02_M225	CROSS	Final	0	FALSE	FALSE		TRUE	XY	0.638504155	0.704524469	1.083	7909.33	1372	19	2	0.032176587	89.13267602	FALSE	0.220119872	0.416217473	1.059508633	0.875801468	0.398769717	0.57438517	0.695255128	0.744690436	0.568063519	1.325270823	0.699680284	0.667187	0.123525052	0.655175864	0.203936447	0.288520131	0.683243992
DZ3613	Cr_MH02_M233	CROSS	Final	0	FALSE	FALSE		TRUE	XY	0.65890411	0.721004566	1.095	8782.57	1664	9	1	0.036119042	117.979082	FALSE	0.26267924	0.442011621	1.033637686	0.976479048	0.407283763	1.343911171	0.855330062	0.774715887	0.719834485	3.543721713	1.004147473	1.129053899	0.146995622	0.612007332	0.247877202	0.351149882	0.778701051
TA9071	Cr_MH02_M236	CROSS	Final	0	FALSE	FALSE		TRUE	XY	0.656593407	0.673076923	1.092	9950.95	1407	19	2	0.028113332	80.03771697	FALSE	0.195157227	0.370718337	1.044121311	0.915289404	0.424381549	2.19114736	0.663755656	0.727870131	0.560549439	5.426818003	1.435842666	1.468603353	0.142297957	0.624663914	0.199679408	0.265502262	0.647375312
IT2203	Cr_MH02_M237	CROSS	Final	0	FALSE	FALSE		TRUE	XY	0.662545788	0.743589744	1.092	7963.31	1468	10	1	0.02842192	69.21584242	FALSE	0.237087363	0.351235886	1.076185751	0.888198579	0.363919056	0.529679288	0.771789688	0.713648031	0.586188458	1.394018439	0.553664291	0.810467076	0.17756437	0.617959169	0.193512514	0.2958569	0.746297774
WC5043	Cr_MH02_M238	CROSS	Final	0	FALSE	FALSE		TRUE	XY	0.641334569	0.728452271	1.079	7111.78	1215	18	2	0.015752251	51.12009192	FALSE	0.312017417	0.447988954	1.100567968	1.018169497	0.426053525	0.570321155	0.873058198	0.80964231	0.642173746	1.648391247	0.669171197	0.843248512	0.177451996	0.576648682	0.2470548	0.346607901	0.794737467
FE1179	Cr_MH02_M246	CROSS	Final	0	FALSE	FALSE		TRUE	XY	0.659340659	0.711538462	1.092	7449.79	1678	14	1	0.036898748	129.5544586	FALSE	0.323633326	0.460549956	1.211980632	0.991303242	0.393568193	0.521491279	0.817338584	0.858413572	0.685925466	1.433463415	0.590754985	0.78606253	0.174904282	0.687938946	0.23074479	0.384977346	0.826600591
CC3956	Cr_MH02_M247	CROSS	Final	0	FALSE	FALSE		TRUE	XY	0.641483516	0.710164835	1.092	8245.92	1714	19	2	0.034316934	114.9519094	FALSE	0.24533334	0.429788116	1.074349017	0.9664169	0.452223443	0.580044175	0.853027541	0.907721232	0.680457426	1.297489574	0.555183407	0.78111322	0.193428906	0.53638624	0.212104801	0.365635206	0.842719418
QM6948	Cr_MH02_M248	CROSS	Final	0	FALSE	FALSE		TRUE	XY	0.643641354	0.746111619	1.093	9156.89	1136	27	0	0.032161212	116.9780718	FALSE	0.199303505	0.354596428	1.063570869	0.970635372	0.402538477	0.53850169	0.668349288	1.738144979	0.532058453	1.255448271	0.631546394	0.852582172	0.13399748	0.550296089	0.558705059	0.462493339	0.709302063
NH6906	Cr_MH02_M253	CROSS	Final	0	FALSE	FALSE		TRUE	XY	0.622571693	0.72386679	1.081	7295.76	1398	22	0	0.038381287	187.9169779	FALSE	0.265907859	0.381454418	0.950963261	0.932185232	0.365554773	0.495493253	0.716306429	0.806769927	0.594866035	1.395467997	0.624883469	0.8237661	0.145701059	0.579925851	0.22903713	0.294965831	0.600348672
KK7342	Cr_MH02_M254	CROSS	Final	0	FALSE	FALSE		TRUE	XY	0.637915129	0.693726937	1.084	7550.23	1437	19	1	0.03393367	105.6558934	FALSE	0.203569837	0.371908979	1.015862489	0.868582295	0.443297491	0.531109333	0.69825646	0.727129735	0.544089062	1.380222034	0.583558035	0.778518867	0.158935461	0.567002258	0.198271988	0.369127609	0.638920554
HD2058	Cr_MH02_M255	CROSS	Final	0	FALSE	FALSE		TRUE	XY	0.631868132	0.68543956	1.092	7559.89	1544	16	3	0.048077092	212.3081517	FALSE	0.257278912	0.400270431	0.98559649	0.94445832	0.380825701	0.50794397	0.7806993	0.768000701	0.580696362	1.354517254	0.610590981	0.867737616	0.132277076	0.605829006	0.225003306	0.314554886	0.714031654
DK2641	Cr_MH02_M256	CROSS	Final	0	FALSE	FALSE		TRUE	XY	0.620960295	0.670821791	1.083	9213.36	1467	35	3	0.051175049	316.0154057	FALSE	0.195911067	0.339940977	1.101334958	0.791241928	0.289904964	0.475396385	0.68867353	0.631365473	0.542907013	1.230386625	0.48321112	0.858535481	0.110057519	0.55278397	0.236287199	0.259514328	0.566134142
JC8747	Cr_MH02_M258	CROSS	Final	0	FALSE	FALSE		TRUE	XY	0.569953052	0.623943662	1.065	7252.04	1324	41	1	0.069347683	1317.347055	FALSE	0.226556983	0.31604906	1.116513628	0.621342523	0.302811403	0.443737292	0.718694459	0.53143677	0.478899819	1.017644878	0.402921183	0.690150761	0.092801491	0.500135227	0.202425838	0.306534494	0.613344772
TA0396	Cr_MH02_M263	CROSS	Final	0	FALSE	FALSE		TRUE	XY	0.607226654	0.69450962	1.0655	7949.04	1172	24	3	0.03925324	396.842771	FALSE	0.222794076	0.299155456	0.794183514	0.63818992	0.330731579	0.535158667	0.648254023	0.566986392	0.494902256	1.096106598	0.390612991	0.729144249	0.102528047	0.463451935	0.199395037	0.294500809	0.640705946
CV2941	Cr_MH02_M264	CROSS	Final	0	FALSE	FALSE		TRUE	XY	0.661887142	0.709990749	1.081	11542.65	1157	23	2	0.024833077	80.41857073	FALSE	0.194496127	0.320550409	0.952727797	0.87414963	0.402767257	0.556198278	0.732934179	0.728948958	0.657821421	1.583778927	0.600815429	1.018483949	0.125534471	0.68225256	0.165906496	0.326874782	0.659467491
MC1184	Cr_MH02_M265	CROSS	Final	0	FALSE	FALSE		TRUE	XY	0.645131938	0.703821656	1.099	10751.28	1614	23	3	0.037577421	122.1823081	FALSE	0.263131355	0.383954129	1.038387573	0.867617277	0.386093409	0.533703681	0.798602266	0.781767068	0.660572245	1.745837938	0.566257931	0.962210627	0.174676806	0.624390521	0.225275412	0.336052875	0.744562211
NP0339	Cr_MH02_M266	CROSS	Final	0	FALSE	FALSE		TRUE	XY	0.653600729	0.69325433	1.097	10725.32	1587	23	3	0.036035581	106.9195075	FALSE	0.239899639	0.271880042	1.017592174	0.915777014	0.405675605	0.526884128	0.749161913	0.852189158	0.615925774	1.533754009	0.570425959	1.024584973	0.193280976	0.7356425	0.210716356	0.278872841	0.695736925
AF2043	Cr_MH02_M267	CROSS	Final	0	FALSE	FALSE		TRUE	XY	0.653633855	0.666513339	1.087	11260.75	1271	12	0	0.021810894	53.13838453	FALSE	0.214372895	0.331061373	0.870368163	0.856514737	0.381679662	0.478653648	0.597917441	0.753946098	0.560264539	1.333569912	0.558399654	0.850653672	0.158515169	0.609728376	0.196434484	0.282041556	0.661856333
CT5181	Cr_MH02_M268	CROSS	Final	0	FALSE	FALSE		TRUE	XY	0.660386029	0.744025735	1.088	11196.44	1332	19	0	0.035389853	95.63970215	FALSE	0.325103204	0.338053744	1.073644399	0.962269758	0.429243406	0.490066286	0.771405596	0.863667028	0.753810725	1.573445918	0.68012662	1.04818989	0.169875355	0.657083591	0.217033183	0.310366383	0.771584225
XE3965	Cr_MH02_M269	CROSS	Final	0	FALSE	FALSE		TRUE	XY	0.636322258	0.73964497	1.0985	9431.55	1736	16	0	0.03972875	129.9644025	FALSE	0.294119231	0.367383971	1.065466529	0.925298677	0.451569504	0.542540773	0.772089488	0.744946545	0.635102449	1.465082745	0.580604509	1.101833832	0.149286185	0.709639514	0.246088946	0.329638316	0.718757847
TH7626	Cr_MH02_M270	CROSS	Final	0	FALSE	FALSE		TRUE	XY	0.64684355	0.725068618	1.093	9332.03	1556	7	1	0.029001757	69.74769201	FALSE	0.237890408	0.379874548	1.119692285	0.859513046	0.428952839	0.587975076	0.689132078	0.741317947	0.589796759	1.492172942	0.529252579	0.952204579	0.122052781	0.671451034	0.257500293	0.331332046	0.756105729
PU9106	Cr_MH02_M272	CROSS	Final	0	FALSE	FALSE		TRUE	XY	0.64576659	0.723112128	1.0925	10439.3	1303	14	1	0.029090709	90.61898022	FALSE	0.195127959	0.310557115	1.026696841	0.778883375	0.363817373	0.472732684	0.657898293	0.671404941	0.6378778	1.49550206	0.55520945	0.865574982	0.126732592	0.577433155	0.209688317	0.276551015	0.731274835
YX0795	Cr_MH02_M275	CROSS	Final	0	FALSE	FALSE		TRUE	XY	0.654093836	0.74425023	1.087	10266.91	1260	22	3	0.024562926	65.73847421	FALSE	0.249247409	0.380153435	1.018515108	0.967769543	0.447164852	0.547194977	0.728262165	0.737515195	0.671088179	1.565223083	0.645277096	0.970691552	0.167333743	0.710048306	0.222462322	0.304278588	0.774235114
CD1873	Cr_MH02_M279	CROSS	Final	0	FALSE	FALSE		TRUE	XY	0.658310121	0.711234912	1.077	9763.24	1327	14	0	0.024807819	63.83601227	FALSE	0.225027799	0.334417734	0.938315732	0.773206578	0.384503576	0.485187384	0.660539041	0.663406942	0.609224099	1.341358239	0.540906602	0.875017061	0.147082348	0.563235259	0.186823261	0.270197238	0.64200011
KC6754	Cr_MH02_M280	CROSS	Final	0	FALSE	FALSE		TRUE	XY	0.658016682	0.715477294	1.079	9836.62	978	19	3	0.016321107	56.27142184	FALSE	0.233616882	0.331821367	1.014169718	0.935280815	0.419351452	0.502103472	0.698614104	0.808814583	0.646055389	1.344771154	0.621555098	0.935992442	0.154422995	0.639549088	0.204135204	0.265131779	0.640260714
TN8718	Cr_MH02_M287	CROSS	Final	0	FALSE	FALSE		TRUE	XY	0.640255009	0.714936248	1.098	9845.89	1753	19	0	0.038701955	108.8891295	FALSE	0.279101325	0.345829698	2.538826716	0.915102961	0.42565999	0.527631507	0.727816628	0.784185345	0.658549123	1.46538352	0.637220419	0.956338455	0.141581968	0.69907366	0.227303044	0.320235254	0.693995397
CX8121	Cr_MH02_M289	CROSS	Final	0	FALSE	FALSE		TRUE	XY	0.65041021	0.704649043	1.097	8895.89	1720	12	2	0.031827367	82.98257889	FALSE	0.212570038	0.354658101	1.024517886	0.874336199	0.46448408	0.481458208	0.733709485	0.681550575	0.537888752	1.512046312	0.598028874	0.899628774	0.145347995	0.641869336	0.213132095	0.336897093	0.70841691
QY2738	Cr_MH02_M292	CROSS	Final	0	FALSE	FALSE		TRUE	XY	0.638229927	0.70939781	1.096	9880.1	1785	22	3	0.038239622	121.2567357	FALSE	0.238560219	0.311433939	0.969524115	0.915273679	0.380259119	0.483699316	0.754445428	0.766692261	0.674891617	1.58247307	0.602625178	0.975698139	0.16396587	0.645438489	0.224491543	0.285118429	0.721348613
TY9985	Cr_MH02_M295	CROSS	Final	0	FALSE	FALSE		TRUE	XY	0.607629428	0.685286104	1.101	8845.92	1940	12	0	0.050505161	220.525989	FALSE	0.306694996	0.395436452	1.066593175	0.944842157	0.426298131	0.6289904	0.808621195	0.724062457	0.659512939	1.51052655	0.77640296	0.906971599	0.14741256	0.704392376	0.199413923	0.316869175	0.77640296
DF8621	Cr_MH02_M296	CROSS	Final	0	FALSE	FALSE		TRUE	XY	0.671441774	0.720887246	1.082	9893.53	1425	21	1	0.02161432	56.53749604	FALSE	0.269266993	0.335572979	0.942636628	0.847827154	0.425126491	0.517712289	0.756454271	0.76231669	0.552482502	1.360788862	0.566633169	0.749075708	0.136553944	0.539443672	0.217920284	0.260170135	0.652851167
DT2452	Cr_MH02_M297	CROSS	Final	0	FALSE	FALSE		TRUE	XY	0.657628676	0.706341912	1.088	10498.14	1519	19	3	0.028062816	76.16073706	FALSE	0.227945211	0.363397818	1.044471056	0.865772679	0.392069573	0.547620985	0.728129207	0.805476265	0.701267297	1.574469866	0.629064008	0.975411182	0.168887112	0.595153229	0.206989111	0.281192755	0.693742152
TY3239	Cr_MH02_M298	CROSS	Final	0	FALSE	FALSE		TRUE	XY	0.645737855	0.707607699	1.091	9523.79	1383	25	2	0.025986163	68.60051031	FALSE	0.342825724	0.3788408	1.16056745	0.8524968	0.421155889	0.631051332	0.82908175	0.749176582	0.761566608	1.824168851	0.664441403	1.1365224	0.196980416	0.741616566	0.269535569	0.366975775	0.745186573
SS3920	Cr_MH02_M299	CROSS	Final	0	FALSE	FALSE		TRUE	XY	0.667731629	0.724326791	1.0955	9709.12	1431	22	3	0.030477707	87.81689058	FALSE	0.309605881	0.389015773	1.014716281	0.845390909	0.449989386	0.628069415	0.885765328	0.815625074	0.735700202	1.760819076	0.695531775	1.07579289	0.184671771	0.785756243	0.269540449	0.355233095	0.76361211
ZT8925	Cr_MH02_M398	CROSS	Final	0	FALSE	FALSE		TRUE	XY	0.610395584	0.655473781	1.087	6781.73	1424	14	0	0.064153306	469.2966072	FALSE	0.305674249	0.459912196	0.988980795	0.94002573	0.433517748	0.582152405	0.81100259	1.193648358	0.793013078	1.390205895	0.561213793	0.744058013	0.158514143	0.593801351	0.209238668	0.342390548	0.766176265
UE0927	Cr_MH02_M399	CROSS	Final	0	FALSE	FALSE		TRUE	XY	0.60724234	0.685236769	1.077	5543.38	1361	25	3	0.056811992	367.445992	FALSE	0.278349866	0.454235231	1.148576536	1.01634682	0.477867009	0.579790323	0.839198688	0.926870778	0.647799331	1.515861258	0.613524234	0.855614655	0.152975169	0.712020039	0.289714766	0.489412304	0.862830465
JU3308	Cr_MH02_M404	CROSS	Final	0	FALSE	FALSE		TRUE	XX	0.932647334	0.04303087	1.069	5361.21	1826	16	186	0.046533055	340.4077182	FALSE	0.316905865	0.492052779	1.083709873	0.963214765	0.449152044	0.654702523	1.058155957	0.736586969	0.687903961	1.967091966	0.689582685	0.872750172	0.164701518	0.704318155	0.34619028	0.414085356	0.883382093
EM3488	Cr_MH02_M405	CROSS	Final	0	FALSE	FALSE		TRUE	XY	0.641728625	0.675650558	1.076	6256.27	1012	23	0	0.030028553	125.7491648	FALSE	0.282277027	0.438760158	1.103533745	0.947370293	0.438440478	0.656621759	0.796961073	1.029208253	0.626731723	1.449426998	0.569189407	0.692425866	0.140978674	0.638400025	0.202676823	0.377221848	0.781776296
AA8055	Cr_MH02_M406	CROSS	Final	0	FALSE	FALSE		TRUE	XY	0.587912088	0.662545788	1.092	6568.17	1524	26	1	0.071678014	628.8737699	FALSE	0.283488334	0.432388221	1.179323648	0.976831981	0.441523184	0.632596148	0.819406129	1.200638561	0.754243397	1.532542195	0.717399049	0.788042758	0.12636698	0.643405853	0.245273741	0.376969449	0.778603297
VY3217	Cr_MH02_M407	CROSS	Final	0	FALSE	FALSE		TRUE	XY	0.580018501	0.665587419	1.081	5082.06	1576	34	3	0.079639798	845.9448087	FALSE	0.332935788	0.483465266	1.325249722	1.013958696	0.471068721	0.679645514	0.944695459	1.220174243	0.763666543	1.544845667	0.721951185	1.023010141	0.163319565	0.746744275	0.272330455	0.478546002	0.890190013
QH1637	Cr_MH02_M410	CROSS	Final	0	FALSE	FALSE		TRUE	XY	0.612009238	0.690069284	1.0825	6635.63	1298	20	2	0.049257632	269.3998957	FALSE	0.257247794	0.440802458	1.068022913	0.936761737	0.487821387	0.541621892	0.821173537	0.838504232	0.706489547	1.335669124	0.603560289	0.757276018	0.125835915	0.60717713	0.193199573	0.347367407	0.708750072
NT3334	Cr_MH02_M411	CROSS	Final	0	FALSE	FALSE		TRUE	XY	0.61712963	0.703240741	1.08	5410.27	1533	13	1	0.037014057	114.1309104	FALSE	0.323274073	0.450624466	1.141902359	0.959286702	0.441197949	0.550064976	0.958362533	0.776486211	0.620856268	1.377565277	0.660041004	0.790348735	0.189454503	0.599600397	0.266530139	0.413103233	0.791272904
HR7856	Cr_MH02_M412	CROSS	Final	0	FALSE	FALSE		TRUE	XY	0.62972973	0.693243243	1.11	9920.57	1567	36	0	0.056437514	259.7775838	FALSE	0.300083512	0.378607213	1.164852223	0.920309865	0.465497366	0.605307857	0.719817387	1.128463191	0.759331239	1.75131036	0.829690087	1.140055265	0.171159491	0.755904017	0.241115137	0.327400486	0.784027396
VH6049	Cr_MH02_M414	CROSS	Final	0	FALSE	FALSE		TRUE	XY	0.63466788	0.711101001	1.099	8617.61	1329	27	2	0.054423457	249.5991467	FALSE	0.314588319	0.406145008	1.132564365	0.942140377	0.405332718	0.630801218	0.830856645	0.975908433	0.742781199	1.60659361	0.662480529	1.142659969	0.177427348	0.738255583	0.283257133	0.333967238	0.762856366
WY8025	Cr_MH02_M415	CROSS	Final	0	FALSE	FALSE		TRUE	XY	0.651569507	0.716143498	1.115	9734.84	1434	68	4	0.059654074	265.4190347	FALSE	0.302110818	0.407402756	1.08938634	0.871817244	0.40750548	0.612542267	0.799705107	1.024875768	0.704788277	1.716618117	0.625793643	0.989230595	0.168775272	0.769504297	0.284750489	0.296255559	0.799396935
QI1648	Cr_MH02_M417	CROSS	Final	0	FALSE	FALSE		TRUE	XY	0.544144981	0.621747212	1.076	4428.91	1286	36	0	0.09280145	1420.528517	FALSE	0.324007441	0.468738292	1.164394687	0.976086529	0.541893979	0.583664973	0.86590142	0.768812082	1.05895115	2.661151014	0.646660148	0.865675631	0.184469742	0.69159219	0.228724417	0.348844249	0.802003089
SZ1451	Cr_MH02_M418	CROSS	Final	0	FALSE	FALSE		TRUE	XY	0.609677419	0.67235023	1.085	5421.71	1455	24	2	0.078996266	855.5139467	FALSE	0.320009983	0.465905024	1.15166705	1.01407198	0.452809514	0.525111482	0.858401418	0.849548115	0.783886125	1.516865762	0.629875557	0.818377114	0.141283946	0.606082307	0.268181277	0.363723162	0.849179228
BD2984	Cr_MH02_M422	CROSS	Final	0	FALSE	FALSE		TRUE	XY	0.653314917	0.706721915	1.086	8925.73	1431	20	3	0.02969251	72.63646444	FALSE	0.269669848	0.376663909	1.071060967	0.853935846	0.391228546	0.499567035	0.667508498	1.418819674	0.628408051	1.431255633	0.621013697	0.789403303	0.175447853	0.571157825	0.181273708	0.275719774	0.727671651
HG0490	Cr_MH02_M424	CROSS	Final	0	FALSE	FALSE		TRUE	XY	0.625856556	0.703060758	1.0945	10204.95	1528	22	2	0.037321546	109.7285483	FALSE	0.194905485	0.305244135	0.893292307	1.000103256	0.421756263	0.466538468	0.61509388	0.785795416	0.600689101	1.335234859	0.673300948	0.84723621	0.184420373	0.610292287	0.181774597	0.279472319	0.657524285
JQ5436	Cr_MH02_M426	CROSS	Final	0	FALSE	FALSE		TRUE	XY	0.628690037	0.697878229	1.084	8447.55	1284	19	0	0.041623106	164.0027836	FALSE	0.245396469	0.402246599	1.058412844	0.806979125	0.444625729	0.44924245	0.746133112	0.701268056	0.604435296	1.419227333	0.662203495	0.765428638	0.133293017	0.624322709	0.21414482	0.313463506	0.68848329
MQ6554	Cr_MH02_M427	CROSS	Final	0	FALSE	FALSE		TRUE	XY	0.652193784	0.719378428	1.094	10807.5	1570	18	3	0.036226664	109.0754664	FALSE	0.201896872	0.335415289	0.983391365	0.869859072	0.389174264	0.513532374	0.634281878	0.681841453	0.608929109	1.380708124	0.665278878	0.878556738	0.161091867	0.740504431	0.168586664	0.24705071	0.63585486
HD9529	Cr_MH02_M428	CROSS	Final	0	FALSE	FALSE		TRUE	XY	0.617137648	0.69006381	1.097	9977.81	1600	13	1	0.048528443	196.5276875	FALSE	0.162159789	0.329831807	0.970553395	0.899395515	0.427448392	0.490087371	0.577481274	0.878248595	0.702759232	1.265307374	0.629496682	0.694741443	0.106135486	0.696244778	0.256168368	0.274709506	0.607748429
VZ3550	Cr_MH02_M436	CROSS	Final	0	FALSE	FALSE		TRUE	XY	0.589277389	0.706293706	1.0725	7798.94	1355	28	1	0.055655612	483.3850604	FALSE	0.214259968	0.36171596	1.019369686	0.887043961	0.393130498	0.521481323	0.700608298	0.736895294	0.633547877	1.386983886	0.708558099	0.808058838	0.125017037	0.618802278	0.211182626	0.29568132	0.667142199
KX1392	Cr_MH02_M440	CROSS	Final	0	FALSE	FALSE		TRUE	XY	0.597438243	0.684354986	1.093	7734.86	1314	35	3	0.08110257	818.817406	FALSE	0.337433372	0.417331389	1.151022726	0.959293342	0.440602656	0.608802203	0.846169127	1.106678033	0.658706143	2.195644047	0.663360396	1.033373542	0.16988025	0.824966417	0.244348304	0.349844715	0.775062478
VF3912	Cr_MH02_M441	CROSS	Final	0	FALSE	FALSE		TRUE	XY	0.601201479	0.674214418	1.082	5537.35	1447	19	2	0.074300461	631.153376	FALSE	0.26149669	0.387549652	1.014383223	0.873882929	0.443533059	0.539427218	0.821691946	0.728506662	0.690221235	1.442024218	0.571391938	0.955149166	0.176979804	0.644350959	0.225378362	0.396940417	0.739522752
EF5323	Cr_MH02_M444	CROSS	Final	0	FALSE	FALSE		TRUE	XY	0.619485294	0.678768382	1.088	6168.49	1761	18	3	0.044605754	205.1031604	FALSE	0.273324574	0.367188707	1.021319583	0.895032606	0.472400836	0.571614738	0.806518242	0.872822958	0.592851701	1.399856285	0.561887885	0.739240841	0.092729334	0.643593451	0.243333443	0.328605523	0.640351167
EJ4320	Cr_MH02_M446	CROSS	Final	0	FALSE	FALSE		TRUE	XY	0.634883721	0.674418605	1.075	5559.45	1294	12	3	0.036937184	124.1657587	FALSE	0.309563198	0.399859959	1.116657951	0.915378917	0.430438543	0.658878556	0.792524957	0.721474717	0.663015659	1.305885426	0.625062239	0.777235665	0.128070306	0.693234495	0.271969527	0.346437373	0.852602882
EZ7429	Cr_MH02_M450	CROSS	Final	0	FALSE	FALSE		TRUE	XY	0.613531047	0.697868397	1.079	6552.75	1054	28	0	0.036284867	175.9786177	FALSE	0.271031236	0.39037044	0.980962154	0.924497313	0.458128249	0.694364935	0.763496213	0.860249481	0.665674691	1.570638221	0.531990365	0.825760145	0.146045548	0.740452453	0.222959817	0.332989953	0.79325471
HF6243	Cr_MH02_M451	CROSS	Final	0	FALSE	FALSE		TRUE	XY	0.631822387	0.701665125	1.081	8449.52	1171	9	0	0.038882056	159.0187259	FALSE	0.273743507	0.434462783	1.09734103	0.9686946	0.475530226	0.648084499	0.820520423	0.77483733	0.693057492	1.61145335	0.660274547	0.9670377	0.172199223	0.739332335	0.251493711	0.306408102	0.728680837
VG0944	Cr_MH02_M454	CROSS	Final	0	FALSE	FALSE		TRUE	XY	0.543761639	0.62150838	1.074	8092.31	1419	44	0	0.076581375	1195.42408	FALSE	0.223669268	0.287927842	0.764800608	0.661616167	0.279401224	0.416692139	0.683859519	0.557937429	0.467728276	1.000332998	0.38567502	0.803973623	0.127899278	0.498745396	0.232443035	0.288669287	0.552129442
RH7023	Cr_MH02_M455	CROSS	Final	0	FALSE	FALSE		TRUE	XY	0.543671182	0.614666044	1.0705	7654.06	1870	53	3	0.096872392	1988.946183	FALSE	0.272404312	0.325709328	0.760902979	0.64449423	0.280504584	0.436630796	0.73738606	0.580084002	0.527954832	1.170881267	0.419123756	0.728893839	0.125423568	0.505352459	0.204727845	0.37156732	0.587531026
FL6520	Cr_MH02_M456	CROSS	Final	0	FALSE	FALSE		TRUE	XY	0.649722736	0.719500924	1.082	10624.51	1175	24	2	0.022244674	44.62568086	FALSE	0.173843252	0.340156747	1.002869434	0.901217722	0.34994543	0.482751509	0.755046326	0.815566743	0.576214611	1.292765057	0.611416222	0.78893023	0.165842885	0.608686685	0.189279252	0.280201061	0.642476467
IR1948	Cr_MH02_M457	CROSS	Final	0	FALSE	FALSE		TRUE	XY	0.655647383	0.713498623	1.089	8413.8	1502	16	1	0.034410279	126.4573024	FALSE	0.212983469	0.335639127	0.919204323	0.819368322	0.301171936	0.497040662	0.742827388	0.618270091	0.5788111	1.243314768	0.62171681	0.780741298	0.112790911	0.545888991	0.163897435	0.270389169	0.713589702
AC2169	Cr_MH02_M459	CROSS	Final	0	FALSE	FALSE		TRUE	XY	0.612442396	0.682488479	1.085	8236.15	1612	21	1	0.037444542	137.8421471	FALSE	0.171560827	0.333408372	0.901271065	0.815429944	0.393873546	0.458709697	0.582189783	0.637434069	0.607080065	1.214888627	0.591053152	0.688064546	0.154441169	0.488213789	0.191837301	0.303904281	0.588260583
IY8907	Cr_MH02_M464	CROSS	Final	0	FALSE	FALSE		TRUE	XY	0.608494922	0.665743306	1.083	9574.84	1247	12	1	0.044699099	219.6359506	FALSE	0.212118391	0.354783936	0.925654996	0.763772423	0.375358689	0.568051171	0.703928092	0.829047655	0.690559724	1.410780514	0.621211319	0.834478554	0.149245288	0.619644713	0.186217179	0.258907676	0.695259541
GC8020	Cr_MH02_M465	CROSS	Final	0	FALSE	FALSE		TRUE	XY	0.606186519	0.680517082	1.083	8309.1	1454	16	1	0.05369866	311.9906356	FALSE	0.204594954	0.334452575	0.8942003	0.866038406	0.408588159	0.534113181	0.62606056	0.887340352	0.665415001	1.285337713	0.661684152	0.80562272	0.158500915	0.638576957	0.170896962	0.278850888	0.699955443
BD2008	Cr_MH02_M471	CROSS	Final	0	FALSE	FALSE		TRUE	XY	0.654587156	0.693119266	1.09	10521.94	1438	17	2	0.032077751	96.29727041	FALSE	0.235888031	0.319712867	1.02709184	0.919602169	0.397360135	0.530890628	0.701391485	0.783790728	0.551039001	1.509417285	0.483846077	0.809546432	0.140373336	0.637239825	0.1850419	0.285403608	0.694263523
MX6819	Cr_MH02_M474	CROSS	Final	0	FALSE	FALSE		TRUE	XY	0.625461255	0.735239852	1.084	9558.27	1292	20	1	0.034486053	138.5119482	FALSE	0.180995134	0.339915139	0.938349916	0.815942803	0.403943475	0.560980293	0.59006506	0.766561471	0.483978895	1.225640458	0.583264665	0.707241101	0.130567588	0.555435356	0.145633079	0.238118453	0.601154936
ZH0762	Cr_MH02_M475	CROSS	Final	0	FALSE	FALSE		TRUE	XY	0.623019571	0.671481827	1.073	8826.8	1039	17	3	0.040924665	263.2045884	FALSE	0.246521831	0.348370694	0.977817059	0.695835057	0.409547986	0.528843707	0.774459207	0.740358531	0.597724807	1.349639049	0.464154385	0.835409917	0.148298289	0.630465987	0.226469274	0.287533275	0.746136387
QI5526	Cr_MH02_M482	CROSS	Final	0	FALSE	FALSE		TRUE	XY	0.650139018	0.693697868	1.079	7658.03	1258	25	0	0.031513288	104.2942549	FALSE	0.299163025	0.430267206	1.051836826	0.962127093	0.465524306	0.65395392	0.902973513	0.781140644	0.791326029	2.646632996	0.618435656	1.047397043	0.209714456	0.647816573	0.234394426	0.344213764	0.924650101
YP0475	Cr_MH02_M483	CROSS	Final	0	FALSE	FALSE		TRUE	XY	0.639275766	0.679201486	1.077	8256.37	942	12	1	0.027642214	121.575318	FALSE	0.296740687	0.427669946	1.62395883	0.980939929	0.449107946	1.044769456	0.819004297	0.808103618	0.649559308	1.423144112	0.658885444	0.973430573	0.159028785	0.630422562	0.234122346	0.308610315	0.757476024
ZT8081	Cr_MH02_M484	CROSS	Final	0	FALSE	FALSE		TRUE	XY	0.668975069	0.709141274	1.083	9424.17	1446	28	3	0.028406545	80.92135585	FALSE	0.278114719	0.374038299	0.998921007	0.800176685	0.429427801	0.568113775	0.76240147	0.676027803	0.685789937	3.007586258	0.617985548	1.046352247	0.179220053	0.771102503	0.257317128	0.429640021	0.804527202
[truncated: 5,749 more rows]
